# Supplementary material for: Proteomic Analysis of the Dysferlin Protein Complex Unveils Its Importance for Sarcolemmal Maintenance and Integrity
Source: PLoS One. 2010 Nov 5;5(11):e13854. doi: 10.1371/journal.pone.0013854 (PMC2974636; doi:10.1371/journal.pone.0013854)
Supplement: Table S4 — DAVID analysis of the dysferlin protein complex. Identified proteins were uploaded into DAVID and analyzed against a background set of random proteins. Protein were clustered based on GO terms, and strongest overrepresented clusters are shown. In bold is the representative GO term that is shown in Table 2. (1.09 MB XLS) [file pone.0013854.s007.xls]

## Sheet: Proliferation
Annotation Cluster 1	Enrichment Score: 19.578442604192507
Category	Term	Count	%	PValue	Genes	List Total	Pop Hits	Pop Total	Fold Enrichment	Bonferroni	Benjamini	FDR
GOTERM_BP_FAT	GO:0006412~translation	70	1.22378e+16	1.31278e-19	11837,13667,67115,76808,107045,13669,20103,56347,13627,19933,22321,13629,231872,13665,20102,223691,16898,55949,107508,67160,75705,433546,20091,54709,269261,67025,105148,27367,19921,234734,22186,270106,66480,70223,69860,66085,100043998,22121,224045,13684,26961,27979,20226,85305,226414,668829,13681,208643,107271,216443,19944,104458,19896,100044332,19988,353172,19989,27050,67891,110954,13722,68135,1…	477	319	13588	6.25093e+15	2.27899e-16	2.27899e-16	2.21977e-17
SP_PIR_KEYWORDS	ribonucleoprotein	50	8.74126e+15	1.8157e-08	11837,76808,67115,20103,19933,20102,16898,268795,433546,20091,269261,192159,67025,15387,15388,27367,19921,15384,15382,56403,22186,66480,270106,59013,22121,11991,23983,26961,108121,18521,51810,76936,320632,668829,19944,19896,229279,19988,19989,27050,67891,110954,19983,20116,27207,20115,19899,98758,76846,16785	550	266	17854	6.10185e+15	6.80888e-07	1.36178e-07	2.50876e-06
GOTERM_MF_FAT	GO:0005198~structural molecule activity	65	1.13636e+16	1.32227e-05	11837,76808,67115,20742,20103,19933,53622,20102,16898,16905,632764,433546,20091,332131,269261,67025,16688,59042,22142,27367,227613,19921,13346,22186,270106,66480,12757,22352,21825,12385,67300,16678,22121,22145,22143,26961,22151,16661,16664,22152,22154,668829,67951,19944,19896,19988,19989,21894,223917,22330,12847,223915,27050,67891,110954,19983,18008,20116,20115,27207,77055,19899,76846,16785,68239	482	450	13288	3.98211e+15	0.00079072	0.0039536	0.00195201
GOTERM_CC_FAT	GO:0030529~ribonucleoprotein complex	63	1.1014e+16	0.000104472	11837,67115,76808,20103,19933,13629,20102,16898,13211,268795,19704,433546,20091,269261,192159,67025,15387,76071,15388,27367,15384,19921,15382,56403,13207,22186,270106,66480,13204,59013,20823,22121,11991,23983,26961,108121,18521,76479,51810,76936,18148,320632,668829,19944,53817,19896,229279,19988,19989,101943,27050,67891,110954,19983,20116,20115,27207,56463,19899,98758,76846,67465,16785	434	462	12504	3.92878e+16	0.0398037	0.0398037	0.0144686
SP_PIR_KEYWORDS	ribosomal protein	34	5.94406e+15	0.503134	11837,67115,76808,26961,20103,19933,20102,16898,268795,433546,20091,269261,668829,67025,19944,27367,19921,19896,19988,22186,270106,66480,19989,27050,67891,110954,19983,20116,20115,27207,19899,22121,76846,16785	550	177	17854	6.2356e+15	1.88675	2.69536	69.518
GOTERM_MF_FAT	GO:0003735~structural constituent of ribosome	33	5.76923e+15	0.261059	11837,67115,76808,26961,20103,19933,20102,16898,433546,20091,269261,668829,67025,19944,27367,19921,19896,19988,22186,270106,19989,66480,27050,67891,110954,19983,20116,20115,27207,19899,22121,76846,16785	482	151	13288	6.0249e+15	1327.83	26.5343	3330.67
GOTERM_CC_FAT	GO:0005840~ribosome	35	6.11888e+15	26.7716	11837,67115,76808,26961,20103,19933,20102,16898,268795,433546,18148,20091,269261,668829,67025,19944,27367,19921,19896,19988,22186,270106,66480,19989,27050,67891,110954,19983,20116,20115,27207,19899,22121,76846,16785	434	192	12504	5.25202e+15	10151.9	253.797	368.594
SP_PIR_KEYWORDS	ribosome	12	2.0979e+15	20361.4	11837,19944,110954,19921,19983,20116,269261,19899,22186,19989,16898,27050	550	23	17854	1.69366e+16	763552	636293	2.81333e+08
Annotation Cluster 2	Enrichment Score: 13.637469854987996
Category	Term	Count	%	PValue	Genes	List Total	Pop Hits	Pop Total	Fold Enrichment	Bonferroni	Benjamini	FDR
GOTERM_MF_FAT	GO:0000166~nucleotide binding	171	2.98951e+16	4.56959e-10	74558,18746,107045,50790,15944,22321,17886,11461,18641,74551,17217,17216,27407,17215,75705,76308,19345,11464,17219,110842,11947,53890,16145,14681,269523,11946,15525,15526,15953,22142,68365,74568,14828,67834,234734,77134,68015,59013,19353,433184,60440,20823,22145,100043998,22143,26926,217342,22151,22152,16562,15926,22201,51797,12709,24015,226414,22154,15481,13681,11928,216443,80914,12469,67054,124…	482	2183	13288	2.15951e+16	2.73262e-06	2.73262e-06	6.74586e-08
SP_PIR_KEYWORDS	nucleotide-binding	129	2.25524e+16	4.24045e-09	74558,18746,107045,50790,15944,22321,17886,11461,18641,74551,17217,27407,17216,17215,76308,19345,11464,17219,11947,14681,269523,15525,11946,15526,22142,68365,14828,234734,68015,19353,60440,22145,22143,22151,217342,22152,16562,51810,22201,51797,12709,24015,226414,22154,15481,13681,11928,216443,12469,80914,67054,12468,12465,11843,12466,23996,12464,11844,18655,68278,66922,104112,19330,12462,12461,53…	550	1631	17854	2.56749e+16	1.59017e-06	2.65028e-07	5.85903e-06
GOTERM_MF_FAT	GO:0032555~purine ribonucleotide binding	135	236013986013986	0.144829	74558,18746,107045,50790,15944,22321,17886,11461,18641,74551,17217,17216,27407,17215,76308,19345,11464,17219,11947,16145,14681,269523,15525,11946,15526,22142,15953,68365,74568,14828,234734,68015,19353,60440,22145,100043998,22143,22151,217342,22152,16562,22201,51797,12709,24015,226414,22154,15481,13681,11928,216443,80914,12469,67054,12468,12465,11843,12466,23996,12464,11844,18655,68278,66922,10411…	482	1796	13288	2.07224e+15	8.6608	28.8693	213.804
GOTERM_MF_FAT	GO:0032553~ribonucleotide binding	135	236013986013986	0.144829	74558,18746,107045,50790,15944,22321,17886,11461,18641,74551,17217,17216,27407,17215,76308,19345,11464,17219,11947,16145,14681,269523,15525,11946,15526,22142,15953,68365,74568,14828,234734,68015,19353,60440,22145,100043998,22143,22151,217342,22152,16562,22201,51797,12709,24015,226414,22154,15481,13681,11928,216443,80914,12469,67054,12468,12465,11843,12466,23996,12464,11844,18655,68278,66922,10411…	482	1796	13288	2.07224e+15	8.6608	28.8693	213.804
GOTERM_MF_FAT	GO:0017076~purine nucleotide binding	138	2.41259e+16	0.0271123	74558,18746,107045,50790,15944,22321,17886,11461,18641,74551,17217,17216,27407,17215,76308,19345,11464,17219,110842,11947,16145,14681,269523,11946,15525,15526,22142,15953,68365,74568,14828,234734,68015,19353,60440,22145,100043998,22143,26926,22151,217342,22152,16562,22201,51797,12709,24015,226414,22154,15481,13681,11928,216443,80914,12469,67054,12468,12465,11843,12466,23996,12464,11844,18655,6827…	482	1871	13288	2.03338e+15	162.132	4.05329	40.0245
SP_PIR_KEYWORDS	atp-binding	95	1.66084e+15	19.744	18746,107045,50790,22321,17886,11461,18641,13211,107508,17217,27407,17216,17215,19704,11464,17219,12567,19182,11947,19181,11636,269523,105148,19184,11946,15525,15526,74117,16573,13207,14828,234734,13205,108156,13204,70223,68015,14635,26395,22027,217342,229363,232087,16562,107476,238880,51810,22201,51797,17220,21454,20226,12709,67089,24015,85305,320632,226414,56454,15481,21354,13681,21355,11898,10…	550	1287	17854	2.39617e+16	749.401	93.7028	27644.6
GOTERM_MF_FAT	GO:0005524~ATP binding	100	1.74825e+16	1.60037e+06	18746,107045,50790,22321,17886,11461,18641,17217,27407,17216,17215,11464,17219,11947,269523,15525,11946,15526,74568,14828,234734,68015,100043998,217342,16562,22201,51797,12709,24015,226414,15481,13681,216443,11928,12469,80914,67054,12468,12465,12466,23996,12464,18655,68278,104112,19330,12462,12461,19139,67059,233789,13424,13211,107508,100019,19704,12567,19182,19181,11636,105148,19184,74117,16573,…	482	1443	13288	1.9105e+15	9.57021e+07	1.06336e+08	2.36255e+09
GOTERM_MF_FAT	GO:0032559~adenyl ribonucleotide binding	100	1.74825e+16	3.03741e+06	18746,107045,50790,22321,17886,11461,18641,17217,27407,17216,17215,11464,17219,11947,269523,15525,11946,15526,74568,14828,234734,68015,100043998,217342,16562,22201,51797,12709,24015,226414,15481,13681,216443,11928,12469,80914,67054,12468,12465,12466,23996,12464,18655,68278,104112,19330,12462,12461,19139,67059,233789,13424,13211,107508,100019,19704,12567,19182,19181,11636,105148,19184,74117,16573,…	482	1460	13288	1.88825e+15	1.81637e+07	1.65125e+08	4.48398e+08
GOTERM_MF_FAT	GO:0001883~purine nucleoside binding	104	1.81818e+16	3.59928e+06	18746,107045,50790,22321,17886,11461,18641,17217,27407,17216,17215,11464,17219,110842,11947,269523,15525,11946,15526,74568,14828,234734,68015,60440,100043998,26926,217342,16562,22201,51797,12709,24015,226414,15481,13681,216443,11928,12469,80914,67054,12468,12465,12466,23996,12464,18655,68278,104112,19330,12462,12461,19139,67059,233789,13424,13211,107508,100019,19704,12567,19182,19181,11636,105148…	482	1548	13288	1.85214e+16	2.15237e+09	1.79364e+08	5.31343e+08
GOTERM_MF_FAT	GO:0030554~adenyl nucleotide binding	103	1.8007e+16	478071	18746,107045,50790,22321,17886,11461,18641,17217,27407,17216,17215,11464,17219,110842,11947,269523,15525,11946,15526,74568,14828,234734,68015,100043998,26926,217342,16562,22201,51797,12709,24015,226414,15481,13681,216443,11928,12469,80914,67054,12468,12465,12466,23996,12464,18655,68278,104112,19330,12462,12461,19139,67059,233789,13424,13211,107508,100019,19704,12567,19182,19181,11636,105148,19184…	482	1535	13288	1.84987e+16	2.85886e+08	2.04205e+07	7.05752e+08
GOTERM_MF_FAT	GO:0001882~nucleoside binding	104	1.81818e+16	513889	18746,107045,50790,22321,17886,11461,18641,17217,27407,17216,17215,11464,17219,110842,11947,269523,15525,11946,15526,74568,14828,234734,68015,60440,100043998,26926,217342,16562,22201,51797,12709,24015,226414,15481,13681,216443,11928,12469,80914,67054,12468,12465,12466,23996,12464,18655,68278,104112,19330,12462,12461,19139,67059,233789,13424,13211,107508,100019,19704,12567,19182,19181,11636,105148…	482	1558	13288	1.84026e+16	3.07306e+08	2.04871e+07	7.58629e+08
UP_SEQ_FEATURE	nucleotide phosphate-binding region:ATP	52	9.09091e+15	2.39583e+12	17886,18641,13211,107508,17217,17216,17215,19704,17219,19182,12567,19181,11947,11636,269523,11946,19184,16573,13207,108156,13205,13204,14635,26395,229363,232087,16562,107476,51810,22201,17220,20226,12709,67089,85305,21354,13681,11898,21355,80914,53817,23996,353172,105787,18655,68278,19179,104112,19139,67059,12534,13424	542	907	16021	1.69467e+15	0.3192615317087165	0.013641002653925982	0.4005771159722782
Annotation Cluster 3	Enrichment Score: 12.215109519417132
Category	Term	Count	%	PValue	Genes	List Total	Pop Hits	Pop Total	Fold Enrichment	Bonferroni	Benjamini	FDR
GOTERM_CC_FAT	GO:0043232~intracellular non-membrane-bounded organelle	132	2.30769e+16	11.4166	22323,13669,20103,20102,75786,223691,17886,11461,16905,72416,17216,11464,56431,56430,269261,67025,16688,22142,76071,19291,13346,66480,12345,11867,12343,22288,12340,18538,108000,22145,22121,16678,23789,76709,22143,66592,22793,22151,16661,68089,16664,13169,22152,16562,29870,22154,668829,216443,218952,109624,68794,19988,19989,21894,56420,110954,19983,18008,27207,77055,53860,13427,13424,20740,11837,6…	434	1919	12504	1.98179e+16	4229.95	1409.98	1532.11
GOTERM_CC_FAT	GO:0043228~non-membrane-bounded organelle	132	2.30769e+16	11.4166	22323,13669,20103,20102,75786,223691,17886,11461,16905,72416,17216,11464,56431,56430,269261,67025,16688,22142,76071,19291,13346,66480,12345,11867,12343,22288,12340,18538,108000,22145,22121,16678,23789,76709,22143,66592,22793,22151,16661,68089,16664,13169,22152,16562,29870,22154,668829,216443,218952,109624,68794,19988,19989,21894,56420,110954,19983,18008,27207,77055,53860,13427,13424,20740,11837,6…	434	1919	12504	1.98179e+16	4229.95	1409.98	1532.11
GOTERM_CC_FAT	GO:0005856~cytoskeleton	84	1.46853e+16	150568	20740,22323,20742,13669,53622,286940,75786,19387,17886,11461,19385,16905,72416,13007,11426,56431,11464,56430,332131,16796,12306,16688,74117,76071,22142,227613,12387,16573,13346,22388,12345,11867,117198,22352,12343,22288,12340,19053,17755,12385,108000,23789,22145,16678,76709,13191,22143,66592,22151,22793,16661,68089,16664,13169,109711,22152,60595,16562,56327,238880,21454,29870,18148,22154,192176,6…	434	1122	12504	2.15698e+15	5.73666e+06	637406	2.08526e+07
GOTERM_CC_FAT	GO:0044430~cytoskeletal part	60	1.04895e+15	7.02675e+06	20740,20742,13669,53622,286940,17886,19385,16905,56431,56430,332131,16796,12306,16688,76071,22142,227613,16573,13346,12345,11867,22352,12343,22288,12340,19053,17755,108000,16678,76709,22145,13191,22143,22151,16661,68089,16664,22152,109711,60595,16562,56327,21454,29870,18148,22154,67951,59069,218952,109624,223917,12631,223915,56420,18008,77055,53860,13427,68239,13424	434	774	12504	2.23342e+16	2.67719e+09	1.67325e+09	9.73152e+09
Annotation Cluster 4	Enrichment Score: 10.532654625474828
Category	Term	Count	%	PValue	Genes	List Total	Pop Hits	Pop Total	Fold Enrichment	Bonferroni	Benjamini	FDR
GOTERM_CC_FAT	GO:0048770~pigment granule	24	4.1958e+15	67.9832	269378,22027,54401,12464,103963,18477,14828,14827,53605,14104,12321,19353,22631,12304,15516,20333,19345,56463,15481,22627,67300,15519,12306,71853	434	85	12504	8.13489e+15	25802.7	516.032	9381.38
GOTERM_CC_FAT	GO:0042470~melanosome	24	4.1958e+15	67.9832	269378,22027,54401,12464,103963,18477,14828,14827,53605,14104,12321,19353,22631,12304,15516,20333,19345,56463,15481,22627,67300,15519,12306,71853	434	85	12504	8.13489e+15	25802.7	516.032	9381.38
GOTERM_CC_FAT	GO:0016023~cytoplasmic membrane-bounded vesicle	43	7.51748e+15	34799.8	269378,22027,15944,109711,103963,66471,11674,53605,12321,22631,11771,12304,19345,15481,216344,12306,59042,27054,68365,54401,12464,14828,18477,14827,353172,12847,12757,14104,12343,19353,13722,15516,56447,13885,15510,20333,20334,56463,16004,22627,67300,15519,71853	434	414	12504	2.99245e+16	1.32587e+08	1.10489e+08	4.81952e+08
GOTERM_CC_FAT	GO:0031988~membrane-bounded vesicle	43	7.51748e+15	548914	269378,22027,15944,109711,103963,66471,11674,53605,12321,22631,11771,12304,19345,15481,216344,12306,59042,27054,68365,54401,12464,14828,18477,14827,353172,12847,12757,14104,12343,19353,13722,15516,56447,13885,15510,20333,20334,56463,16004,22627,67300,15519,71853	434	420	12504	2.9497e+15	2.09136e+09	1.60874e+08	7.60205e+08
GOTERM_CC_FAT	GO:0031410~cytoplasmic vesicle	46	8.04196e+15	6.15582e+06	269378,22027,15944,109711,103963,66471,11674,53605,29876,12321,22631,11771,12304,19345,15481,216344,12306,59042,27054,68365,226101,54401,12464,213827,14828,18477,14827,353172,12847,12757,14104,12343,19353,13722,15516,56447,13885,15510,20333,20334,56463,16004,22627,67300,15519,71853	434	508	12504	2.60888e+15	2.34537e+09	1.56358e+09	8.52535e+09
GOTERM_CC_FAT	GO:0031982~vesicle	46	8.04196e+15	1.17193e+08	269378,22027,15944,109711,103963,66471,11674,53605,29876,12321,22631,11771,12304,19345,15481,216344,12306,59042,27054,68365,226101,54401,12464,213827,14828,18477,14827,353172,12847,12757,14104,12343,19353,13722,15516,56447,13885,15510,20333,20334,56463,16004,22627,67300,15519,71853	434	519	12504	2.55358e+16	4.46504e+09	2.12621e+08	1.62303e+11
Annotation Cluster 5	Enrichment Score: 9.483513826550297
Category	Term	Count	%	PValue	Genes	List Total	Pop Hits	Pop Total	Fold Enrichment	Bonferroni	Benjamini	FDR
GOTERM_BP_FAT	GO:0045184~establishment of protein localization	63	1.1014e+16	666.701	20742,233726,17886,72322,19386,110750,22631,65114,76308,170625,11771,22630,11426,19345,20910,269523,15526,59042,76071,70361,75751,68365,53421,75608,68090,69482,12757,56447,20333,20334,18538,227699,67300,100043998,60595,14569,16211,108124,67437,192176,21354,216344,70572,21355,27054,11843,66525,54401,213827,238799,71805,11844,12847,30930,71810,69091,19330,56041,76983,75471,22627,22628,22629	477	656	13588	2.73573e+15	1.15737e+07	385791	1.1273e+07
GOTERM_BP_FAT	GO:0008104~protein localization	68	1.18881e+16	12013.9	20742,233726,17886,72322,19386,110750,22631,65114,76308,170625,11771,22630,11426,19345,20910,269523,15526,59042,76071,70361,75751,68365,53421,12387,75608,68090,69482,12757,56447,20333,20334,18538,227699,67300,100043998,320528,60595,14569,16211,108124,67437,18148,192176,21354,216344,70572,21355,27054,11843,66525,54401,213827,238799,71805,21894,11844,12847,30930,71810,69091,19330,56041,76983,14694,…	477	753	13588	2.57247e+16	2.08558e+06	521396	2.0314e+07
GOTERM_BP_FAT	GO:0015031~protein transport	62	1.08392e+16	15282.1	20742,233726,17886,72322,19386,110750,22631,65114,76308,170625,11771,22630,11426,19345,20910,269523,15526,59042,76071,70361,75751,68365,53421,75608,68090,69482,12757,56447,20333,20334,18538,227699,67300,100043998,60595,14569,16211,108124,67437,21354,216344,70572,21355,27054,11843,66525,54401,213827,238799,71805,11844,12847,30930,71810,69091,19330,56041,76983,75471,22627,22628,22629	477	651	13588	2.71299e+16	2.65299e+07	530599	2.58407e+07
GOTERM_BP_FAT	GO:0046907~intracellular transport	48	8.39161e+15	36728.1	20742,233726,17886,16562,72322,19385,19386,16211,108124,110750,22631,67437,11771,11426,22630,18148,192176,70572,269523,21355,15526,59042,18432,70361,75751,27054,53421,54401,16573,213827,15382,238799,12847,30930,12757,56447,20333,71810,69091,20334,56041,18538,22627,75471,67300,22628,100043998,22629	477	431	13588	3.1725e+16	6.37605e+06	1.06267e+07	6.21038e+06
SP_PIR_KEYWORDS	protein transport	44	7.69231e+16	99094.4	233726,60595,72322,19386,16211,108124,110750,65114,76308,170625,11771,19345,20910,21354,216344,70572,21355,59042,76071,70361,75751,27054,68365,11843,53421,66525,213827,75608,68090,238799,71805,11844,69482,12847,30930,56447,20333,71810,69091,20334,76983,19330,56041,227699	550	461	17854	3.09831e+15	3.71604e+07	2.47736e+06	1.36919e+08
GOTERM_BP_FAT	GO:0034613~cellular protein localization	35	6.11888e+15	1.36214e+07	20742,233726,72322,16211,108124,110750,22631,11771,67437,11426,22630,192176,70572,269523,21355,15526,75751,27054,53421,54401,12387,213827,238799,12847,12757,56447,20334,56041,18538,75471,22627,67300,22628,100043998,22629	477	299	13588	3.33453e+16	2.36466e+09	3.37809e+08	2.30323e+10
GOTERM_BP_FAT	GO:0070727~cellular macromolecule localization	35	6.11888e+15	1.62405e+06	20742,233726,72322,16211,108124,110750,22631,11771,67437,11426,22630,192176,70572,269523,21355,15526,75751,27054,53421,54401,12387,213827,238799,12847,12757,56447,20334,56041,18538,75471,22627,67300,22628,100043998,22629	477	301	13588	3.31237e+16	2.81934e+10	3.52418e+08	2.74609e+10
GOTERM_BP_FAT	GO:0006886~intracellular protein transport	33	5.76923e+15	2.60246e+07	20742,233726,72322,16211,108124,110750,22631,11771,67437,11426,22630,70572,269523,21355,15526,75751,27054,53421,54401,213827,238799,12847,12757,56447,20334,56041,18538,75471,22627,67300,22628,100043998,22629	477	276	13588	3.40598e+16	4.51786e+09	5.01986e+08	4.40049e+09
SP_PIR_KEYWORDS	transport	85	1.48601e+15	3.46468e+09	110611,233726,11739,17709,72322,19386,22273,72416,110750,65114,11771,170625,76308,19345,20910,110842,18674,67003,11947,227197,11949,16796,269523,11946,59042,76071,94280,70361,75751,68365,53421,15382,68349,75608,66445,68090,69482,56447,11950,20333,20334,67273,14057,16004,227699,66945,72736,60595,16211,29876,108124,110826,66108,67680,21354,216344,70572,71679,21355,11928,27054,11843,53382,66525,5381…	550	1571	17854	1.75637e+15	1.29917e+12	4.81204e+08	4.78714e+11
GOTERM_BP_FAT	GO:0006605~protein targeting	17	2.97203e+15	1.64493e+10	75751,20742,233726,54401,72322,238799,16211,110750,22631,67437,22630,11426,22627,70572,100043998,22628,15526	477	133	13588	3.64112e+16	0.028152421944324324	7.31945e+10	0.02781045747352051
Annotation Cluster 6	Enrichment Score: 9.33298978468303
Category	Term	Count	%	PValue	Genes	List Total	Pop Hits	Pop Total	Fold Enrichment	Bonferroni	Benjamini	FDR
GOTERM_MF_FAT	GO:0051082~unfolded protein binding	20	3.4965e+16	33282.3	12469,22027,12468,12465,12466,12464,320011,68015,56445,21454,15516,15502,18148,12406,56351,12462,15481,12461,15519,15526	482	70	13288	7.8767e+15	1.99028e+06	331713	491329
SP_PIR_KEYWORDS	Chaperone	25	4.37063e+15	325837	22027,21454,245688,15502,24015,18148,12406,15481,15526,12469,12468,12465,12466,108903,12464,68015,56445,12539,15516,15510,12462,12461,23950,268390,15519	550	150	17854	541030303030303	1.22189e+08	939915	4.50209e+08
SP_PIR_KEYWORDS	molecular chaperone	10	1.74825e+16	40208.2	12469,22027,12465,12466,15510,12406,12464,12462,15481,12461	550	14	17854	2.3187e+16	1.50781e+07	1.077e+07	5.55557e+07
GOTERM_CC_FAT	GO:0005832~chaperonin-containing T-complex	7	1.22378e+16	1.13301e+08	21454,12468,12465,12466,12464,12462,12461	434	7	12504	288110599078341	4.31678e+09	2.27199e+09	1.56914e+11
GOTERM_BP_FAT	GO:0006457~protein folding	19	3.32168e+16	4.37811e+09	12469,22027,12468,12465,12466,12464,234734,19386,68015,56445,21454,15516,15502,15510,12462,15481,12461,15519,15526	477	127	13588	4.26174e+15	7.59752e+11	4.75014e+10	7.4029e+11
Annotation Cluster 8	Enrichment Score: 8.169469664226563
Category	Term	Count	%	PValue	Genes	List Total	Pop Hits	Pop Total	Fold Enrichment	Bonferroni	Benjamini	FDR
GOTERM_MF_FAT	GO:0008135~translation factor activity, nucleic acid binding	21	3.67133e+16	251703	13684,13667,13669,56347,13627,100044332,13665,13629,223691,69860,55949,67160,27979,66085,75705,68135,54709,66656,13681,208643,224045	482	98	13288	5.90753e+16	1.50518e+09	1.50518e+06	3.71576e+08
SP_PIR_KEYWORDS	Initiation factor	15	2.62238e+16	782597	13684,13667,13669,56347,13665,100044332,223691,27979,66085,75705,68135,54709,13681,208643,224045	550	55	17854	8.85322e+15	2.93474e+08	1.72632e+08	1.08132e+10
GOTERM_MF_FAT	GO:0003743~translation initiation factor activity	16	2.7972e+15	3.75537e+06	13684,13667,13669,56347,13665,100044332,223691,69860,27979,66085,75705,68135,54709,13681,208643,224045	482	62	13288	7.11444e+15	2.24571e+09	1.40357e+09	5.54386e+09
GOTERM_CC_FAT	GO:0005852~eukaryotic translation initiation factor 3 complex	8	1.3986e+16	3.87846e+08	27979,66085,13669,56347,68135,54709,100044332,223691	434	12	12504	1.92074e+16	1.47768e+11	5.91078e+08	5.37138e+11
GOTERM_BP_FAT	GO:0006413~translational initiation	11	1.92308e+16	4.95351e+08	13684,27979,13667,66085,13669,56347,68135,54709,223691,69860,224045	477	38	13588	8.24606e+15	8.5956e+11	5.05828e+11	8.37583e+11
Annotation Cluster 9	Enrichment Score: 7.707591714193437
Category	Term	Count	%	PValue	Genes	List Total	Pop Hits	Pop Total	Fold Enrichment	Bonferroni	Benjamini	FDR
GOTERM_CC_FAT	GO:0031967~organelle envelope	55	9.61538e+15	145.622	50790,233726,17709,11739,19386,16905,22273,18673,72416,110750,18674,67003,11947,227197,11949,11946,75751,68349,66445,69482,18293,21917,11950,14057,18538,16004,108000,227699,100043998,66945,26926,66592,16211,108037,12034,66108,56454,67680,70572,71679,66525,22333,238799,71805,269951,11740,52585,22335,22334,15510,97212,56428,432676,74205,114584	434	540	12504	2.93446e+16	554800	92466.7	2.01669e+06
GOTERM_CC_FAT	GO:0031975~envelope	55	9.61538e+15	16949.8	50790,233726,17709,11739,19386,16905,22273,18673,72416,110750,18674,67003,11947,227197,11949,11946,75751,68349,66445,69482,18293,21917,11950,14057,18538,16004,108000,227699,100043998,66945,26926,66592,16211,108037,12034,66108,56454,67680,70572,71679,66525,22333,238799,71805,269951,11740,52585,22335,22334,15510,97212,56428,432676,74205,114584	434	542	12504	292363154046287	645786	92255.2	2.34741e+06
GOTERM_CC_FAT	GO:0005739~mitochondrion	94	1.64336e+16	11658.8	19285,18746,50790,68263,11739,17709,22321,22273,74551,72416,18673,22631,27407,76308,11429,20910,18674,110842,21672,67003,11947,227197,11949,11636,11946,15526,94280,11669,68349,67834,225791,66445,11564,108156,70223,68015,18293,12343,14104,66736,16828,11950,67273,14057,433184,67300,66945,12261,12934,26926,66592,14004,107476,15926,29876,110826,108037,20226,12709,24015,66108,12034,85305,56454,67680,2…	434	1322	12504	2.04859e+16	4.442e+07	555250	1.61465e+07
GOTERM_CC_FAT	GO:0019866~organelle inner membrane	36	6.29371e+15	776784	66592,17709,11739,16905,22273,18673,72416,108037,66108,12034,18674,56454,67003,11947,67680,227197,11949,71679,11946,66525,68349,22333,66445,269951,11740,52585,22335,22334,11950,15510,97212,56428,14057,432676,18538,66945	434	312	12504	3.32435e+16	2.95955e+09	2.11396e+07	1.07579e+10
GOTERM_CC_FAT	GO:0005743~mitochondrial inner membrane	33	5.76923e+15	1.0556e+08	66592,17709,11739,22273,18673,108037,66108,12034,18674,56454,67003,11947,67680,227197,11949,71679,11946,66525,68349,22333,66445,269951,11740,52585,22335,22334,11950,15510,97212,56428,14057,432676,66945	434	296	12504	3.21204e+15	4.02184e+09	2.23436e+08	1.46193e+11
GOTERM_CC_FAT	GO:0031966~mitochondrial membrane	37	6.46853e+15	1.7708e+08	26926,50790,66592,17709,11739,22273,18673,108037,66108,12034,18674,56454,67003,11947,67680,227197,11949,71679,11946,66525,68349,22333,66445,269951,11740,52585,22335,18293,22334,11950,15510,97212,56428,14057,432676,74205,66945	434	368	12504	2.89676e+16	6.74672e+09	3.0667e+08	2.45242e+11
GOTERM_CC_FAT	GO:0005740~mitochondrial envelope	37	6.46853e+15	8.39383e+07	26926,50790,66592,17709,11739,22273,18673,108037,66108,12034,18674,56454,67003,11947,67680,227197,11949,71679,11946,66525,68349,22333,66445,269951,11740,52585,22335,18293,22334,11950,15510,97212,56428,14057,432676,74205,66945	434	391	12504	2.72637e+15	3.198e+11	1.23002e+10	1.16248e+12
SP_PIR_KEYWORDS	mitochondrion inner membrane	22	3.84615e+16	2.24945e+09	11739,17709,66525,68349,66445,11740,22273,18673,11950,12034,18674,56454,56428,67003,67680,432676,11947,227197,11949,71679,66945,11946	550	183	17854	3.90251e+15	8.43507e+09	3.37416e+09	3.10806e+12
GOTERM_CC_FAT	GO:0044429~mitochondrial part	43	7.51748e+15	3.29876e+09	68263,26926,50790,66592,17709,11739,22273,18673,110826,108037,12034,66108,110842,18674,56454,67003,11947,67680,227197,11949,71679,11946,66525,11669,68349,22333,66445,269951,11740,52585,22335,18293,22334,11950,15510,97212,67273,56428,14057,432676,74205,66945,12261	434	524	12504	2.36427e+16	1.25675e+12	4.48866e+08	4.56852e+12
GOTERM_CC_FAT	GO:0031090~organelle membrane	57	9.96503e+15	4.5787e+09	50790,17709,15944,11739,103963,22273,16905,18673,72416,18674,67003,11947,227197,11949,11946,59042,68349,66445,12757,12343,18293,11950,56447,20333,20334,14057,18538,67300,66945,26926,66592,109711,108037,67437,12034,66108,56454,66624,67680,216344,71679,27054,66525,22333,269951,12847,11740,52585,22335,22334,15510,97212,20014,56041,56428,432676,74205	434	809	12504	2.02995e+16	1.74433e+11	6.01545e+09	6.34114e+11
SP_PIR_KEYWORDS	mitochondrion	51	8.91608e+15	1.10102e+10	19285,68263,50790,17709,11739,22273,74551,18673,72416,11429,110842,18674,67003,11947,227197,11949,11946,15526,94280,11669,68349,66445,67834,68015,18293,11950,67273,14057,66945,12261,26926,14004,29876,110826,12034,66108,24015,56454,67680,71679,66525,22333,269951,11740,22335,22334,15510,97212,56428,432676,74205	550	790	17854	2.09564e+16	4.12799e+11	1.25116e+11	0.0015212761556582244
SP_PIR_KEYWORDS	transit peptide	32	5.59441e+15	3.51846e+11	68263,26926,14004,22273,74551,72416,66108,11429,18674,110842,67003,11947,67680,227197,11949,11946,15526,11669,66525,68349,67834,66445,269951,68015,18293,11950,15510,97212,67273,432676,66945,12261	550	457	17854	2.27304e+15	0.013107793745198437	3.14104e+12	0.04860363230825282
UP_SEQ_FEATURE	transit peptide:Mitochondrion	32	5.59441e+15	1.37092e+12	68263,26926,14004,22273,74551,72416,66108,11429,18674,110842,67003,11947,67680,227197,11949,11946,15526,11669,66525,68349,67834,66445,269951,68015,18293,11950,15510,97212,67273,432676,66945,12261	542	449	16021	2.10666e+16	0.1975199262840216	0.008763306598171927	0.22939996253195094
Annotation Cluster 10	Enrichment Score: 7.468400802854942
Category	Term	Count	%	PValue	Genes	List Total	Pop Hits	Pop Total	Fold Enrichment	Bonferroni	Benjamini	FDR
UP_SEQ_FEATURE	domain:PCI	10	1.74825e+16	1.98048e+06	13669,56347,23997,108679,66997,26894,26572,209318,22123,26891	542	18	16021	1.64217e+15	3.17867e+10	1.58933e+10	3.31757e+10
SP_PIR_KEYWORDS	signalosome	7	1.22378e+16	6.38779e+07	108679,26754,26894,26572,209318,26893,26891	550	9	17854	2.52481e+15	2.39539e+11	1.14068e+10	8.82601e+10
GOTERM_CC_FAT	GO:0008180~signalosome	7	1.22378e+16	3.1094e+08	108679,26754,26894,26572,209318,26893,26891	434	10	12504	2.01677e+15	1.18461e+12	4.3877e+09	4.30628e+10
Annotation Cluster 11	Enrichment Score: 7.37692124382518
Category	Term	Count	%	PValue	Genes	List Total	Pop Hits	Pop Total	Fold Enrichment	Bonferroni	Benjamini	FDR
GOTERM_MF_FAT	GO:0003924~GTPase activity	22	3.84615e+16	5.92438e+07	22142,229900,14688,22151,227613,13627,22152,13629,100702,14469,19353,19345,60440,22154,14693,56055,75471,16145,22145,67951,14681,22143	482	128	13288	4.73833e+15	3.54278e+10	2.08399e+09	8.74587e+08
GOTERM_MF_FAT	GO:0005525~GTP binding	37	6.46853e+15	2.12829e+07	74558,631323,15944,22151,13627,13629,22152,56327,100702,74551,76308,19345,22154,56055,216344,16145,67951,14681,240327,22142,15953,68365,229900,11843,227613,11844,11566,14469,19353,66922,19330,60440,53860,75471,22145,67059,22143	482	354	13288	2.88145e+16	1.27271e+11	6.6985e+08	3.14188e+10
GOTERM_MF_FAT	GO:0019001~guanyl nucleotide binding	37	6.46853e+15	4.05978e+08	74558,631323,15944,22151,13627,13629,22152,56327,100702,74551,76308,19345,22154,56055,216344,16145,67951,14681,240327,22142,15953,68365,229900,11843,227613,11844,11566,14469,19353,66922,19330,60440,53860,75471,22145,67059,22143	482	363	13288	2.81001e+16	2.42772e+11	1.21387e+10	5.99325e+09
GOTERM_MF_FAT	GO:0032561~guanyl ribonucleotide binding	37	6.46853e+15	4.05978e+08	74558,631323,15944,22151,13627,13629,22152,56327,100702,74551,76308,19345,22154,56055,216344,16145,67951,14681,240327,22142,15953,68365,229900,11843,227613,11844,11566,14469,19353,66922,19330,60440,53860,75471,22145,67059,22143	482	363	13288	2.81001e+16	2.42772e+11	1.21387e+10	5.99325e+09
SP_PIR_KEYWORDS	gtp-binding	30	5.24476e+15	1.37167e+09	74558,15944,22151,13627,13629,22152,56327,74551,76308,19345,22154,56055,216344,67951,14681,22142,68365,11843,227613,11844,11566,14469,19353,66922,19330,60440,53860,75471,22145,22143	550	313	17854	3.11136e+16	5.14363e+11	2.14323e+09	1.89523e+11
UP_SEQ_FEATURE	nucleotide phosphate-binding region:GTP	29	506993006993007	1.92107e+09	74558,15944,22151,13627,13629,22152,56327,74551,76308,19345,22154,56055,216344,67951,14681,22142,68365,11843,227613,11844,11566,14469,19353,66922,19330,60440,53860,22145,22143	542	274	16021	3.12851e+15	3.08285e+12	1.02772e+12	3.21805e+12
Annotation Cluster 12	Enrichment Score: 6.9753352689547565
Category	Term	Count	%	PValue	Genes	List Total	Pop Hits	Pop Total	Fold Enrichment	Bonferroni	Benjamini	FDR
SP_PIR_KEYWORDS	actin-binding	32	5.59441e+15	28834.2	20740,22323,20742,68089,13169,109711,286940,60595,17886,15185,20430,11426,56431,192176,70435,16796,59069,74117,14086,68794,12798,22330,12631,12345,22388,11867,12343,22288,12340,71994,23789,76709	550	226	17854	4.59636e+15	1.0813e+07	1.0813e+06	3.98409e+07
GOTERM_MF_FAT	GO:0003779~actin binding	39	6.81818e+16	4126.02	22323,20740,20742,68089,13169,109711,286940,60595,17886,15185,20430,72416,11426,56431,192176,70435,16796,59069,74117,109624,14086,68794,12798,22330,21894,12631,22388,12345,11867,12343,22288,12340,17755,71994,12385,76709,22628,23789,22629	482	288	13288	3.73323e+16	2.46737e+06	352481	6.09105e+06
GOTERM_CC_FAT	GO:0030863~cortical cytoskeleton	15	2.62238e+16	90583.8	20740,20742,109624,109711,60595,17886,11461,12345,12631,12343,22288,12340,56431,16796,59069	434	43	12504	1.00504e+16	3.45125e+06	3.1375e+07	1.25452e+09
GOTERM_MF_FAT	GO:0008092~cytoskeletal protein binding	44	7.69231e+16	4.35825e+06	22323,20740,20742,68089,13169,109711,286940,75786,60595,17886,15185,20430,72416,11426,56431,56430,192176,70435,16796,12306,59069,74117,76071,109624,14086,16573,68794,12798,22330,21894,12631,22388,12345,11867,12343,22288,12340,17755,71994,12385,76709,23789,22628,22629	482	414	13288	2.92998e+15	2.60623e+09	2.0048e+07	6.43386e+08
GOTERM_CC_FAT	GO:0015629~actin cytoskeleton	27	472027972027972	9.96864e+06	20740,20742,68089,109711,60595,286940,17886,13007,11426,56431,16796,12306,59069,218952,109624,68794,21894,22330,12345,22388,12631,11867,12343,22288,12340,12385,76709	434	205	12504	3.79463e+15	3.79805e+10	2.23415e+09	1.38058e+10
GOTERM_CC_FAT	GO:0005938~cell cortex	21	3.67133e+16	1.14373e+08	218952,20740,20742,109624,13169,109711,286940,60595,17886,11461,12631,12345,12343,22288,12340,11426,56431,192176,53860,16796,59069	434	126	12504	480184331797235	4.35761e+09	2.17881e+09	1.58398e+09
GOTERM_CC_FAT	GO:0044448~cell cortex part	16	2.7972e+15	2.23746e+08	20740,20742,109624,109711,60595,17886,11461,12345,12631,12343,22288,12340,56431,53860,16796,59069	434	73	12504	6.31475e+15	8.52468e+09	3.7064e+08	3.09871e+11
SP_PIR_KEYWORDS	cytoskeleton	44	7.69231e+16	1.11412e+09	22323,20740,66592,20742,13669,22793,68089,13169,109711,286940,19387,11461,56327,238880,11426,11464,56430,192176,16796,68045,59069,74117,76071,218952,12387,16573,68794,22330,21894,12631,22388,12345,11867,117198,56420,12340,19053,69116,12385,53860,76709,23789,13191,21345	550	583	17854	2.44995e+16	4.17785e+10	1.89906e+10	1.53937e+11
GOTERM_BP_FAT	GO:0007010~cytoskeleton organization	30	5.24476e+15	4.05774e+10	22323,68089,16664,13169,109711,75786,60595,17886,19385,13007,18148,11464,22154,192176,70435,16796,16688,12798,21894,12631,12345,12343,56420,12340,19353,17755,71994,22629,22143,21345	477	326	13588	2.62145e+15	0.0070195040332940994	2.70896e+12	0.006860991370438718
GOTERM_BP_FAT	GO:0030834~regulation of actin filament depolymerization	8	1.3986e+16	1.27666e+10	20740,12340,20742,56431,13169,12345,12631,12343	477	24	13588	9.49546e+15	0.02191916378493808	6.15448e+11	0.021584770958715804
GOTERM_BP_FAT	GO:0030029~actin filament-based process	19	3.32168e+16	4.60441e+11	22323,68089,68794,13169,109711,60595,17886,12798,21894,12631,12345,12343,12340,19353,13007,11464,71994,192176,70435	477	176	13588	3.07523e+16	0.07682303413791403	0.001597409458414134	0.07782711055389635
GOTERM_BP_FAT	GO:0030036~actin cytoskeleton organization	18	3.14685e+15	6.78644e+10	22323,68089,13169,109711,60595,17886,12798,21894,12631,12345,12343,12340,19353,13007,11464,71994,192176,70435	477	165	13588	3.1076e+15	0.11114098156593388	0.0022204865450543565	0.11468960881134693
GOTERM_CC_FAT	GO:0030864~cortical actin cytoskeleton	7	1.22378e+16	7.74884e+10	22288,20740,20742,109624,56431,16796,12631	434	22	12504	916715542521994	0.029092637079044192	6.86374e+11	0.10726218658099196
GOTERM_BP_FAT	GO:0007015~actin filament organization	7	1.22378e+16	0.013226575514357675	68089,13169,11464,109711,60595,192176,12631	477	56	13588	3.5608e+16	0.9999999999084868	0.18066582763045969	2.01595e+16
Annotation Cluster 13	Enrichment Score: 6.880095454874158
Category	Term	Count	%	PValue	Genes	List Total	Pop Hits	Pop Total	Fold Enrichment	Bonferroni	Benjamini	FDR
SP_PIR_KEYWORDS	Aminoacyl-tRNA synthetase	13	2.27273e+15	1.16275e+07	107045,104458,22321,234734,353172,70223,107508,20226,85305,226414,107271,216443,105148	550	39	17854	1.08206e+15	4.36032e+09	2.29491e+08	1.60658e+10
GOTERM_BP_FAT	GO:0006418~tRNA aminoacylation for protein translation	14	2.44755e+16	3.59526e+07	107045,104458,22321,234734,353172,70223,107508,20226,85305,226414,100043998,107271,105148,216443	477	46	13588	866976574605779	6.24135e+09	6.24137e+08	6.0792e+08
GOTERM_BP_FAT	GO:0043039~tRNA aminoacylation	14	2.44755e+16	3.59526e+07	107045,104458,22321,234734,353172,70223,107508,20226,85305,226414,100043998,107271,105148,216443	477	46	13588	866976574605779	6.24135e+09	6.24137e+08	6.0792e+08
GOTERM_BP_FAT	GO:0043038~amino acid activation	14	2.44755e+16	3.59526e+07	107045,104458,22321,234734,353172,70223,107508,20226,85305,226414,100043998,107271,105148,216443	477	46	13588	866976574605779	6.24135e+09	6.24137e+08	6.0792e+08
GOTERM_MF_FAT	GO:0004812~aminoacyl-tRNA ligase activity	14	2.44755e+16	9.43769e+06	107045,104458,22321,234734,353172,70223,107508,20226,85305,226414,100043998,107271,105148,216443	482	48	13288	8.0408e+15	5.64372e+09	3.13541e+08	1.39324e+11
GOTERM_MF_FAT	GO:0016876~ligase activity, forming aminoacyl-tRNA and related compounds	14	2.44755e+16	9.43769e+06	107045,104458,22321,234734,353172,70223,107508,20226,85305,226414,100043998,107271,105148,216443	482	48	13288	8.0408e+15	5.64372e+09	3.13541e+08	1.39324e+11
GOTERM_MF_FAT	GO:0016875~ligase activity, forming carbon-oxygen bonds	14	2.44755e+16	9.43769e+06	107045,104458,22321,234734,353172,70223,107508,20226,85305,226414,100043998,107271,105148,216443	482	48	13288	8.0408e+15	5.64372e+09	3.13541e+08	1.39324e+11
SP_PIR_KEYWORDS	ligase	30	5.24476e+15	2.59779e+07	107045,50790,217342,229363,22321,59026,107476,107508,22201,51797,20226,85305,226414,11898,107271,105148,216443,117146,27053,67054,17999,104458,234734,108156,353172,70223,70790,11566,69116,74205	550	290	17854	3.35812e+16	9.74165e+09	4.87085e+08	3.58936e+11
GOTERM_BP_FAT	GO:0006399~tRNA metabolic process	16	2.7972e+15	9.09887e+09	107045,212528,104458,22321,234734,353172,70223,107508,20226,85305,226414,66965,100043998,107271,105148,216443	477	113	13588	4.03347e+16	0.015671614000598466	4.78543e+10	0.0153841108080921
UP_SEQ_FEATURE	short sequence motif:"HIGH" region	7	1.22378e+16	1.29887e+11	107045,104458,22321,107271,105148,107508,216443	542	17	16021	1.21714e+16	0.020631146450998616	0.0017357370116746207	0.021755503301901236
UP_SEQ_FEATURE	short sequence motif:"KMSKS" region	6	1.04895e+15	9.77038e+10	107045,22321,107271,105148,107508,216443	542	15	16021	1.18236e+16	0.14514397680906577	0.006512957241341155	0.1635408508080305
GOTERM_BP_FAT	GO:0034660~ncRNA metabolic process	17	2.97203e+15	0.002016101108860702	107045,212528,104458,22321,234734,353172,70223,72662,107508,20226,85305,226414,66965,100043998,107271,105148,216443	477	202	13588	2.39737e+15	0.9699076533079865	0.03776813033028481	3.35489e+15
Annotation Cluster 14	Enrichment Score: 4.821542164699642
Category	Term	Count	%	PValue	Genes	List Total	Pop Hits	Pop Total	Fold Enrichment	Bonferroni	Benjamini	FDR
GOTERM_BP_FAT	GO:0019320~hexose catabolic process	12	2.0979e+15	1.4297e+10	18746,68263,18641,66171,11674,100042025,18293,18655,16828,21991,433184,100044223,110208	477	52	13588	6.57378e+16	0.0024788823407151384	1.18182e+12	0.0024174422301848075
GOTERM_BP_FAT	GO:0006007~glucose catabolic process	12	2.0979e+15	1.4297e+10	18746,68263,18641,66171,11674,100042025,18293,18655,16828,21991,433184,100044223,110208	477	52	13588	6.57378e+16	0.0024788823407151384	1.18182e+12	0.0024174422301848075
GOTERM_BP_FAT	GO:0046365~monosaccharide catabolic process	12	2.0979e+15	2.12668e+10	18746,68263,18641,66171,11674,100042025,18293,18655,16828,21991,433184,100044223,110208	477	54	13588	6.33031e+15	0.003685110686220461	1.53818e+12	0.0035959262199569686
SP_PIR_KEYWORDS	glycolysis	10	1.74825e+16	4.14815e+08	18746,16828,68263,433184,21991,18641,100044223,11674,18655,18293,100042025	550	42	17854	7.729e+16	0.001554349539683031	4.44435e+11	0.005731346760662337
GOTERM_BP_FAT	GO:0044275~cellular carbohydrate catabolic process	12	2.0979e+15	6.29777e+09	18746,68263,18641,66171,11674,100042025,18293,18655,16828,21991,433184,100044223,110208	477	60	13588	569727463312369	0.010873410668899908	3.90387e+11	0.010648321794570759
GOTERM_BP_FAT	GO:0006006~glucose metabolic process	18	3.14685e+15	7.92715e+08	18746,68263,18641,66171,11674,74551,105787,100042025,18293,18655,16828,13722,56351,21991,433184,100044223,110208,19046,19045	477	140	13588	3.66253e+15	0.013667335392320124	4.29957e+12	0.013403129445943573
GOTERM_BP_FAT	GO:0046164~alcohol catabolic process	12	2.0979e+15	1.40454e+11	18746,68263,18641,66171,11674,100042025,18293,18655,16828,21991,433184,100044223,110208	477	65	13588	5.25902e+15	0.024088102700160707	6.58782e+11	0.023746606759944555
GOTERM_BP_FAT	GO:0006096~glycolysis	10	1.74825e+16	1.75034e+11	18746,16828,68263,433184,21991,18641,100044223,11674,18655,18293,100042025	477	44	13588	6.47418e+15	0.02992921485335376	7.40853e+11	0.029592335183870055
GOTERM_BP_FAT	GO:0019318~hexose metabolic process	19	3.32168e+16	2.67379e+10	18746,68263,18641,66171,11674,14635,74551,105787,100042025,18293,18655,16828,13722,56351,21991,433184,100044223,110208,19046,19045	477	169	13588	3.20261e+16	0.04535683504262644	0.001078897979568949	0.0452013753686642
GOTERM_BP_FAT	GO:0016052~carbohydrate catabolic process	12	2.0979e+15	1.14911e+12	18746,68263,18641,66171,11674,100042025,18293,18655,16828,21991,433184,100044223,110208	477	81	13588	4.2202e+16	0.18085729954730323	0.0035561079622000724	0.1941248053459299
GOTERM_BP_FAT	GO:0005996~monosaccharide metabolic process	19	3.32168e+16	1.33179e+11	18746,68263,18641,66171,11674,14635,74551,105787,100042025,18293,18655,16828,13722,56351,21991,433184,100044223,110208,19046,19045	477	191	13588	2.83372e+15	0.2064309471987129	0.003911224712596306	0.22495370002846293
SP_PIR_KEYWORDS	gluconeogenesis	5	0.8741258741258742	0.0015295417600460206	433184,21991,11674,18655,100042025,74551	550	17	17854	95475935828877	0.43674186888144095	0.010019940831628715	2.09278e+16
Annotation Cluster 15	Enrichment Score: 4.7845732786576995
Category	Term	Count	%	PValue	Genes	List Total	Pop Hits	Pop Total	Fold Enrichment	Bonferroni	Benjamini	FDR
SP_PIR_KEYWORDS	Intermediate filament	14	2.44755e+16	3.58282e+08	16661,16664,53622,13346,223917,223915,16905,22352,18008,332131,77055,16678,16688,68239	550	74	17854	6.14143e+15	1.34347e+12	4.79842e+09	4.95038e+11
UP_SEQ_FEATURE	region of interest:Linker 1	13	2.27273e+15	1.53205e+10	16661,16664,53622,13346,223917,223915,16905,22352,18008,77055,16678,16688,68239	542	65	16021	5.91181e+15	0.0024559268640286236	4.91669e+11	0.002566360889555419
UP_SEQ_FEATURE	region of interest:Coil 1A	13	2.27273e+15	1.53205e+10	16661,16664,53622,13346,223917,223915,16905,22352,18008,77055,16678,16688,68239	542	65	16021	5.91181e+15	0.0024559268640286236	4.91669e+11	0.002566360889555419
UP_SEQ_FEATURE	region of interest:Coil 1B	13	2.27273e+15	1.53205e+10	16661,16664,53622,13346,223917,223915,16905,22352,18008,77055,16678,16688,68239	542	65	16021	5.91181e+15	0.0024559268640286236	4.91669e+11	0.002566360889555419
UP_SEQ_FEATURE	region of interest:Rod	13	2.27273e+15	1.81585e+10	16661,16664,53622,13346,223917,223915,16905,22352,18008,77055,16678,16688,68239	542	66	16021	5.82224e+16	0.002910203020016433	4.85623e+10	0.0030417493167123055
UP_SEQ_FEATURE	region of interest:Head	13	2.27273e+15	2.14512e+10	16661,16664,53622,13346,223917,223915,16905,22352,18008,77055,16678,16688,68239	542	67	16021	5.73534e+15	0.003437001088179348	4.91725e+11	0.0035932985336772916
UP_SEQ_FEATURE	region of interest:Tail	13	2.27273e+15	3.47063e+10	16661,16664,53622,13346,223917,223915,16905,22352,18008,77055,16678,16688,68239	542	70	16021	5.48954e+15	0.0055548811533217	6.18738e+11	0.005813600742621272
UP_SEQ_FEATURE	region of interest:Linker 12	12	2.0979e+15	3.78372e+10	16661,18008,53622,16664,13346,77055,223917,16678,223915,16688,68239,22352	542	59	16021	6.01201e+15	0.006054483334554384	6.07104e+11	0.006338046118836704
UP_SEQ_FEATURE	region of interest:Coil 2	11	1.92308e+16	2.51284e+11	16661,53622,16664,77055,223917,16678,223915,16688,68239,16905,22352	542	59	16021	5.51101e+15	0.039529170754686205	0.0028766877827580695	0.04208514266764718
UP_SEQ_FEATURE	site:Stutter	8	1.3986e+16	6.25212e+09	16661,16664,13346,223917,16678,223915,16688,16905	542	31	16021	7.62814e+16	0.09547886610091683	0.004767153696821791	0.10467966017922992
GOTERM_CC_FAT	GO:0005882~intermediate filament	15	2.62238e+16	2.81255e+12	16661,16664,53622,13346,223917,223915,16905,22352,18008,56430,332131,77055,16678,16688,68239	434	137	12504	3.1545e+16	0.10163007117906642	0.0022302872894248704	0.3888144311326336
GOTERM_CC_FAT	GO:0045111~intermediate filament cytoskeleton	15	2.62238e+16	3.52013e+12	16661,16664,53622,13346,223917,223915,16905,22352,18008,56430,332131,77055,16678,16688,68239	434	140	12504	3.0869e+15	0.12553282660567788	0.0026267503673500503	0.48641041934996965
GOTERM_CC_FAT	GO:0045095~keratin filament	9	1.57343e+16	0.001567231001778886	16661,53622,16664,332131,77055,223917,16678,223915,16688	434	64	12504	4.05156e+15	0.449860507240055	0.008879497694500138	2.14878e+16
SP_PIR_KEYWORDS	keratin	10	1.74825e+16	0.006457766132694145	16661,53622,16664,332131,77055,223917,16678,223915,16688,68239	550	109	17854	2.97815e+16	0.9119204936689126	0.03459769484892816	8.56267e+15
Annotation Cluster 16	Enrichment Score: 4.33191629968471
Category	Term	Count	%	PValue	Genes	List Total	Pop Hits	Pop Total	Fold Enrichment	Bonferroni	Benjamini	FDR
GOTERM_CC_FAT	GO:0033279~ribosomal subunit	13	2.27273e+15	2.30392e+10	20103,19921,20102,19989,16898,27050,110954,18148,433546,668829,76846,22121,16785	434	66	12504	5.67491e+16	8.77409e+11	2.83156e+11	0.0031907088676952355
GOTERM_CC_FAT	GO:0022626~cytosolic ribosome	7	1.22378e+16	2.16927e+11	19944,110954,20103,19921,433546,668829,19989	434	18	12504	1.12043e+16	0.008230952452719542	2.36115e+11	0.030038593518721957
GOTERM_CC_FAT	GO:0022625~cytosolic large ribosomal subunit	5	0.8741258741258742	4.56843e+10	110954,19921,433546,668829,19989	434	7	12504	2.05793e+16	0.017255492392463267	4.14345e+12	0.06325071315035347
GOTERM_CC_FAT	GO:0015934~large ribosomal subunit	7	1.22378e+16	0.0020596188447976936	110954,19921,433546,18148,668829,19989,22121	434	39	12504	5.17122e+15	0.5441192413506946	0.011002740436282021	2.81498e+15
Annotation Cluster 17	Enrichment Score: 4.255574421005789
Category	Term	Count	%	PValue	Genes	List Total	Pop Hits	Pop Total	Fold Enrichment	Bonferroni	Benjamini	FDR
GOTERM_BP_FAT	GO:0051493~regulation of cytoskeleton organization	18	3.14685e+15	5.27582e+07	20740,20742,13169,19385,15185,12631,12345,11867,12343,12340,19353,218397,18148,56431,80880,17755,76709,74117	477	99	13588	517934057556699	9.15841e+10	8.32617e+09	8.92085e+10
GOTERM_BP_FAT	GO:0008064~regulation of actin polymerization or depolymerization	13	2.27273e+15	1.07484e+09	20740,20742,13169,12345,12631,11867,12343,12340,19353,218397,56431,76709,74117	477	50	13588	7.40646e+16	1.86575e+10	1.55492e+10	1.81744e+12
GOTERM_BP_FAT	GO:0032956~regulation of actin cytoskeleton organization	14	2.44755e+16	1.16565e+09	20740,20742,13169,12345,12631,11867,12343,12340,19353,218397,56431,80880,76709,74117	477	60	13588	6.64682e+15	2.02336e+12	1.55658e+10	1.97099e+12
GOTERM_BP_FAT	GO:0030832~regulation of actin filament length	13	2.27273e+15	1.36146e+08	20740,20742,13169,12345,12631,11867,12343,12340,19353,218397,56431,76709,74117	477	51	13588	7.26123e+15	2.36321e+12	1.68819e+11	2.30207e+12
GOTERM_BP_FAT	GO:0032970~regulation of actin filament-based process	14	2.44755e+16	1.43469e+09	20740,20742,13169,12345,12631,11867,12343,12340,19353,218397,56431,80880,76709,74117	477	61	13588	6.53786e+15	2.49031e+11	1.6604e+11	2.4259e+10
GOTERM_BP_FAT	GO:0043244~regulation of protein complex disassembly	11	1.92308e+16	1.71644e+10	20740,12340,20742,19704,56431,13169,17755,15185,12345,12631,12343	477	43	13588	7.28721e+15	0.0029753030161489002	1.29545e+12	0.00290227380830288
GOTERM_BP_FAT	GO:0030833~regulation of actin filament polymerization	11	1.92308e+16	2.68178e+10	20740,12340,19353,20742,218397,13169,76709,12345,11867,74117,12343	477	45	13588	6.96334e+15	0.0046447594668975745	1.86206e+11	0.004534511806675301
GOTERM_BP_FAT	GO:0033043~regulation of organelle organization	19	3.32168e+16	7.40343e+09	20740,20742,13169,19385,15185,12631,12345,11867,12343,12340,19353,218397,18148,56431,80880,17755,76709,22629,74117	477	154	13588	3.51455e+15	0.01277016344582449	4.43088e+12	0.012517677213508271
GOTERM_BP_FAT	GO:0030834~regulation of actin filament depolymerization	8	1.3986e+16	1.27666e+10	20740,12340,20742,56431,13169,12345,12631,12343	477	24	13588	9.49546e+15	0.02191916378493808	6.15448e+11	0.021584770958715804
GOTERM_BP_FAT	GO:0043254~regulation of protein complex assembly	12	2.0979e+15	1.40454e+11	20740,12340,19353,20742,218397,13169,76709,12345,11867,71902,74117,12343	477	65	13588	5.25902e+15	0.024088102700160707	6.58782e+11	0.023746606759944555
GOTERM_BP_FAT	GO:0032271~regulation of protein polymerization	11	1.92308e+16	2.49048e+11	20740,12340,19353,20742,218397,13169,76709,12345,11867,74117,12343	477	57	13588	549737026003163	0.04231390644446642	0.0010288804160832887	0.042102982852953996
GOTERM_BP_FAT	GO:0044087~regulation of cellular component biogenesis	13	2.27273e+15	6.08697e+11	20740,20742,13169,12345,11867,12343,12340,19353,218397,80880,76709,74117,71902	477	89	13588	4.16093e+15	0.10028126139393212	0.0020301110920595278	0.10287443674009689
GOTERM_BP_FAT	GO:0032535~regulation of cellular component size	17	2.97203e+15	1.68646e+12	20740,20742,13169,68349,12345,12631,20430,11867,12343,12340,19353,218397,18148,56431,12567,76709,74117	477	161	13588	30078779118976	0.2538245900287065	0.004711359665559578	0.2847806615503323
GOTERM_BP_FAT	GO:0043242~negative regulation of protein complex disassembly	8	1.3986e+16	1.77607e+12	20740,12340,20742,13169,17755,15185,12345,12343	477	35	13588	6.51117e+15	0.2653436864089971	0.004882525494753098	0.29989004011494735
GOTERM_BP_FAT	GO:0051494~negative regulation of cytoskeleton organization	9	1.57343e+16	2.34918e+12	20740,12340,20742,80880,13169,17755,15185,12345,12343	477	48	13588	5.34119e+15	0.3349313296127807	0.006069045501861381	0.39647941951094223
GOTERM_BP_FAT	GO:0051693~actin filament capping	6	1.04895e+15	3.99575e+12	20740,12340,20742,13169,12345,12343	477	19	13588	8.9957e+15	0.5003264846058377	0.009724246846510187	0.6734952340676004
GOTERM_BP_FAT	GO:0030835~negative regulation of actin filament depolymerization	6	1.04895e+15	6.59897e+11	20740,12340,20742,13169,12345,12343	477	21	13588	8.13896e+15	0.6820810412037274	0.014965295008951052	1.10998e+16
SP_PIR_KEYWORDS	actin capping	5	0.8741258741258742	0.0011985639174056394	20740,12340,20742,12345,12343	550	16	17854	1.01443e+16	0.36220032795002655	0.008293767916003336	1.6434e+16
GOTERM_BP_FAT	GO:0010639~negative regulation of organelle organization	9	1.57343e+16	0.001372382532905052	20740,12340,20742,80880,13169,17755,15185,12345,12343	477	62	13588	413511868533171	0.9078274020573209	0.027341276121147784	2.29539e+15
GOTERM_BP_FAT	GO:0030837~negative regulation of actin filament polymerization	6	1.04895e+15	0.001534927389884041	20740,12340,20742,13169,12345,12343	477	25	13588	6.83673e+15	0.9305175484303493	0.0298486549124094	2.56395e+15
GOTERM_BP_FAT	GO:0031333~negative regulation of protein complex assembly	6	1.04895e+15	0.0022017065579077247	20740,12340,20742,13169,12345,12343	477	27	13588	6.33031e+15	0.978211574944438	0.040308914628459314	3.65836e+15
GOTERM_BP_FAT	GO:0032272~negative regulation of protein polymerization	6	1.04895e+15	0.0022017065579077247	20740,12340,20742,13169,12345,12343	477	27	13588	6.33031e+15	0.978211574944438	0.040308914628459314	3.65836e+15
GOTERM_BP_FAT	GO:0051129~negative regulation of cellular component organization	10	1.74825e+16	0.005236837427818584	20740,12340,20742,80880,13169,17755,15185,22629,12345,12343	477	93	13588	3.06305e+16	0.9998900008198985	0.08469278057306617	8.4955e+15
GOTERM_CC_FAT	GO:0008290~F-actin capping protein complex	3	0.5244755244755245	0.01116100407878163	12340,12345,12343	434	5	12504	1.72866e+16	0.9861053418749829	0.04541729029024999	1.43962e+16
GOTERM_BP_FAT	GO:0031110~regulation of microtubule polymerization or depolymerization	3	0.5244755244755245	0.2570149463552328	17755,15185,12343	477	28	13588	3.05211e+15	1.0	0.9375094920426936	9.93417e+15
Annotation Cluster 18	Enrichment Score: 3.884334141547256
Category	Term	Count	%	PValue	Genes	List Total	Pop Hits	Pop Total	Fold Enrichment	Bonferroni	Benjamini	FDR
GOTERM_BP_FAT	GO:0034622~cellular macromolecular complex assembly	25	4.37063e+15	6.3017e+08	13669,233726,22151,27374,68089,22152,76479,16211,53605,110750,17216,668829,22154,192176,67951,70572,22142,75751,227613,238799,12343,22145,22143,17955,56086	477	217	13588	3.28184e+16	0.0010933779652578801	6.07746e+10	0.0010655458374864146
GOTERM_BP_FAT	GO:0043623~cellular protein complex assembly	17	2.97203e+15	1.04536e+10	22142,75751,233726,22151,227613,68089,22152,238799,16211,12343,110750,22154,192176,70572,67951,22145,22143	477	108	13588	4.48397e+15	0.0018130971369453297	9.0733e+10	0.0017675749646173244
GOTERM_BP_FAT	GO:0034621~cellular macromolecular complex subunit organization	26	4.54545e+15	1.65889e+10	19285,13669,233726,22151,27374,68089,22152,76479,16211,53605,110750,17216,668829,22154,192176,67951,70572,22142,75751,227613,238799,12343,22145,22143,17955,56086	477	245	13588	3.02304e+16	0.002875694618200031	1.30893e+12	0.0028049716321199014
GOTERM_BP_FAT	GO:0051258~protein polymerization	10	1.74825e+16	7.64695e+09	22142,22151,227613,68089,22152,22154,22145,67951,22143,12343	477	40	13588	7.12159e+15	0.0131874376503186	4.28139e+12	0.012929401422290265
GOTERM_BP_FAT	GO:0065003~macromolecular complex assembly	28	4.8951e+15	5.88329e+11	19285,13669,233726,22151,27374,68089,22152,76479,16211,53605,110750,17216,18148,668829,22154,192176,70572,67951,22142,75751,227613,238799,12343,15452,22145,22143,17955,56086	477	338	13588	2.35982e+16	0.09709403493149504	0.002000679636205649	0.09943359161843635
GOTERM_BP_FAT	GO:0043933~macromolecular complex subunit organization	28	4.8951e+15	2.31809e+12	19285,13669,233726,22151,27374,68089,22152,76479,16211,53605,110750,17216,18148,668829,22154,192176,70572,67951,22142,75751,227613,238799,12343,15452,22145,22143,17955,56086	477	367	13588	2.17335e+15	0.3313317410850485	0.006079433155502079	0.39124261406372485
GOTERM_BP_FAT	GO:0006461~protein complex assembly	20	3.4965e+16	4.03367e+10	22142,19285,75751,233726,22151,227613,68089,22152,238799,16211,12343,110750,18148,15452,22154,192176,70572,22145,67951,22143	477	227	13588	2.50981e+16	0.5036066565133057	0.00954845865719356	0.6798669661152945
GOTERM_BP_FAT	GO:0070271~protein complex biogenesis	20	3.4965e+16	4.03367e+10	22142,19285,75751,233726,22151,227613,68089,22152,238799,16211,12343,110750,18148,15452,22154,192176,70572,22145,67951,22143	477	227	13588	2.50981e+16	0.5036066565133057	0.00954845865719356	0.6798669661152945
GOTERM_BP_FAT	GO:0007017~microtubule-based process	18	3.14685e+15	0.0012223826258906723	22142,22151,227613,16573,22152,75786,17886,16562,19385,12343,56420,18148,17755,22154,67951,22145,22143,13424	477	211	13588	2.43012e+15	0.88037031653991	0.024961212894116458	2.04694e+15
SP_PIR_KEYWORDS	microtubule	17	2.97203e+15	0.001363579727824066	22142,76071,22151,227613,16573,22152,16562,29870,17755,56430,22154,13427,67951,22145,13191,22143,13424	550	221	17854	2.49706e+15	0.4005192069105119	0.009260335506044326	1.86768e+16
GOTERM_BP_FAT	GO:0007018~microtubule-based movement	11	1.92308e+16	0.002815106248153271	22142,22151,227613,16573,22152,22154,16562,22145,67951,22143,13424	477	101	13588	3.10248e+16	0.9925079747956772	0.04970070156677231	465493215415802
GOTERM_CC_FAT	GO:0015630~microtubule cytoskeleton	28	4.8951e+15	0.003896002757878259	13669,22151,22152,75786,17886,16562,19385,56327,21454,29870,18148,11426,56430,22154,67951,22142,76071,227613,16573,56420,19053,17755,108000,13427,22145,13191,22143,13424	434	450	12504	1.79269e+16	0.7740126267125045	0.018419206102552987	5.26267e+15
GOTERM_CC_FAT	GO:0005874~microtubule	17	2.97203e+15	0.009407481112506166	22142,76071,22151,227613,16573,22152,16562,29870,17755,56430,22154,13427,67951,22145,13191,22143,13424	434	240	12504	2.04078e+15	0.9727094877901388	0.0396554023971859	1.22697e+16
Annotation Cluster 19	Enrichment Score: 3.730232224731465
Category	Term	Count	%	PValue	Genes	List Total	Pop Hits	Pop Total	Fold Enrichment	Bonferroni	Benjamini	FDR
SP_PIR_KEYWORDS	Spliceosome	15	2.62238e+16	7.78827e+08	15387,108121,53817,15382,229279,56403,13207,101943,76479,51810,59013,76936,192159,98758,67465	550	111	17854	4.38673e+16	0.002916352665595867	7.89324e+10	0.010760524057296106
SP_PIR_KEYWORDS	mrna splicing	19	3.32168e+16	2.59535e+10	15387,108121,53817,230908,229279,15382,56403,13207,101943,13204,76479,51810,59013,68278,71514,76936,192159,98758,67465	550	191	17854	3.22919e+15	0.009685474047123277	2.43287e+12	0.03585398445690169
UP_SEQ_FEATURE	domain:RRM 2	13	2.27273e+15	3.85904e+10	15388,15384,15382,229279,230908,72459,56403,71514,59013,17184,76936,98758,11991	542	88	16021	4.36668e+15	0.06005958691306734	0.003863691416337245	0.06462438433697537
UP_SEQ_FEATURE	domain:RRM 1	13	2.27273e+15	3.85904e+10	15388,15384,15382,229279,230908,72459,56403,71514,59013,17184,76936,98758,11991	542	88	16021	4.36668e+15	0.06005958691306734	0.003863691416337245	0.06462438433697537
GOTERM_CC_FAT	GO:0005681~spliceosome	15	2.62238e+16	9.72088e+10	15387,108121,53817,15382,229279,56403,13207,101943,13204,76479,59013,76936,192159,98758,67465	434	124	12504	3.48521e+16	0.036360841876770134	8.04858e+11	0.13454290934948876
GOTERM_BP_FAT	GO:0016071~mRNA metabolic process	25	4.37063e+15	1.62478e+12	108121,23983,27374,76479,71514,319322,76936,19704,192159,15387,15388,53817,230908,229279,15382,56403,13207,101943,13204,59013,68278,98758,67465,233789,11991	477	302	13588	2.35814e+15	0.24578990832809033	0.00461365724464835	0.27437785152036875
GOTERM_BP_FAT	GO:0008380~RNA splicing	19	3.32168e+16	2.52402e+12	15387,108121,27374,53817,230908,229279,15382,56403,13207,101943,13204,76479,59013,68278,71514,76936,192159,98758,67465	477	201	13588	2.69274e+15	0.35481896769581445	0.006423754364814238	0.42592835288594033
GOTERM_BP_FAT	GO:0006397~mRNA processing	22	3.84615e+16	3.66401e+11	15387,15388,108121,23983,27374,53817,230908,229279,15382,56403,13207,101943,13204,76479,59013,68278,71514,319322,76936,192159,98758,67465	477	262	13588	2.39199e+15	0.47069415624766675	0.00904723749404257	0.6177429300445292
SP_PIR_KEYWORDS	mrna processing	19	3.32168e+16	4.69367e+12	15387,108121,53817,230908,229279,15382,56403,13207,101943,13204,76479,51810,59013,68278,71514,76936,192159,98758,67465	550	240	17854	2.56989e+16	0.1614273474802962	0.00358649302608105	0.6465779814081807
GOTERM_BP_FAT	GO:0006396~RNA processing	30	5.24476e+15	7.44543e+11	83701,108121,23983,212528,27374,76479,71514,319322,76936,192159,53890,15387,15388,53817,19896,229279,15382,230908,13207,56403,234734,101943,72662,13204,59013,68278,20823,66965,98758,67465	477	437	13588	1.95559e+16	0.7255562226221924	0.016440393647516593	1.25152e+16
UP_SEQ_FEATURE	domain:RRM 3	5	0.8741258741258742	0.06038077678922105	59013,15388,76936,56403,98758	542	44	16021	3.35898e+15	1.0	0.7553414469252406	6.47703e+15
Annotation Cluster 20	Enrichment Score: 3.6679867004593456
Category	Term	Count	%	PValue	Genes	List Total	Pop Hits	Pop Total	Fold Enrichment	Bonferroni	Benjamini	FDR
GOTERM_CC_FAT	GO:0046930~pore complex	14	2.44755e+16	1.11769e+10	75751,233726,22333,238799,71805,19386,69482,22335,16211,22334,110750,227699,100043998,70572	434	73	12504	5.52541e+15	4.25749e+12	1.41945e+11	0.0015479021622355482
GOTERM_BP_FAT	GO:0006605~protein targeting	17	2.97203e+15	1.64493e+10	75751,20742,233726,54401,72322,238799,16211,110750,22631,67437,22630,11426,22627,70572,100043998,22628,15526	477	133	13588	3.64112e+16	0.028152421944324324	7.31945e+10	0.02781045747352051
GOTERM_CC_FAT	GO:0005635~nuclear envelope	18	3.14685e+15	2.19916e+10	75751,233726,71805,238799,19386,69482,16211,16905,72416,110750,21917,18538,16004,108000,227699,70572,100043998,114584	434	153	12504	3.38954e+16	0.008343874409090235	2.3272e+12	0.03045236679968255
GOTERM_BP_FAT	GO:0006913~nucleocytoplasmic transport	14	2.44755e+16	2.88575e+11	18432,75751,20742,233726,15382,72322,238799,16211,110750,18148,75471,70572,100043998,15526	477	96	13588	4.15426e+15	0.04886310193842114	0.0011379265041983055	0.04878370169568713
GOTERM_CC_FAT	GO:0005643~nuclear pore	11	1.92308e+16	3.06773e+09	110750,75751,233726,71805,238799,69482,227699,19386,70572,100043998,16211	434	59	12504	5.37155e+15	0.011620197819166456	2.99654e+11	0.04247741817248185
GOTERM_BP_FAT	GO:0051169~nuclear transport	14	2.44755e+16	3.6051e+11	18432,75751,20742,233726,15382,72322,238799,16211,110750,18148,75471,70572,100043998,15526	477	98	13588	4.06948e+15	0.060667336626524015	0.0013030167609321408	0.0609408595969807
UP_SEQ_FEATURE	domain:Importin N-terminal	6	1.04895e+15	6.69909e+10	110750,75751,233726,238799,70572,16211	542	14	16021	126681602530311	0.10194506134387582	0.004875531895628393	0.1121594601109055
GOTERM_BP_FAT	GO:0000059~protein import into nucleus, docking	6	1.04895e+15	1.15905e+12	110750,75751,233726,238799,70572,16211	477	15	13588	1.13945e+15	0.18226932109317528	0.0035239908545188214	0.19580196883932643
GOTERM_MF_FAT	GO:0008565~protein transporter activity	10	1.74825e+16	5.84838e+11	110750,75751,233726,11771,53421,56041,72322,238799,70572,16211	482	66	13288	4.17704e+16	0.2951961210151517	0.015095156299510082	0.8599015485202699
GOTERM_BP_FAT	GO:0051170~nuclear import	9	1.57343e+16	8.78911e+11	110750,75751,20742,233726,15382,238799,70572,100043998,16211	477	58	13588	4.4203e+15	0.7826966071662589	0.018899874336109623	1.4758e+16
GOTERM_BP_FAT	GO:0006606~protein import into nucleus	8	1.3986e+16	0.003255000536899485	110750,75751,20742,233726,238799,70572,100043998,16211	477	56	13588	4.06948e+15	0.9965171258538903	0.055567141164390654	5.36363e+15
GOTERM_BP_FAT	GO:0034504~protein localization in nucleus	8	1.3986e+16	0.005273434942330421	110750,75751,20742,233726,238799,70572,100043998,16211	477	61	13588	3.73592e+15	0.9998968066939546	0.08447601556379214	8.55241e+15
GOTERM_BP_FAT	GO:0033365~protein localization in organelle	9	1.57343e+16	0.020398888939851395	110750,75751,20742,233726,11426,238799,70572,100043998,16211	477	97	13588	2.64307e+16	0.9999999999999997	0.25598292758223895	2.94247e+15
GOTERM_BP_FAT	GO:0017038~protein import	8	1.3986e+16	0.02466717614376188	110750,75751,20742,233726,238799,70572,100043998,16211	477	82	13588	2.77916e+16	1.0	0.2854611961160889	3.4448e+16
Annotation Cluster 21	Enrichment Score: 3.499733265159635
Category	Term	Count	%	PValue	Genes	List Total	Pop Hits	Pop Total	Fold Enrichment	Bonferroni	Benjamini	FDR
GOTERM_BP_FAT	GO:0009064~glutamine family amino acid metabolic process	10	1.74825e+16	1.43635e+11	27053,14583,51797,236539,69051,229363,56454,14630,11898,69719	477	43	13588	6.62474e+15	0.024626848920216826	6.55973e+10	0.024284326297796532
GOTERM_BP_FAT	GO:0006541~glutamine metabolic process	6	1.04895e+15	3.99575e+12	27053,14583,51797,236539,229363,69719	477	19	13588	8.9957e+15	0.5003264846058377	0.009724246846510187	0.6734952340676004
UP_SEQ_FEATURE	active site:For GATase activity	4	0.6993006993006993	0.0012107447452604186	27053,14583,51797,229363	542	7	16021	1.68909e+16	0.8569301996634913	0.05403994214207697	2.00893e+15
SP_PIR_KEYWORDS	glutamine amidotransferase	4	0.6993006993006993	0.0014426366752211058	27053,14583,51797,229363	550	8	17854	1.62309e+15	0.4180550096545572	0.009620908522651184	1.97497e+16
Annotation Cluster 22	Enrichment Score: 3.3480535096767734
Category	Term	Count	%	PValue	Genes	List Total	Pop Hits	Pop Total	Fold Enrichment	Bonferroni	Benjamini	FDR
SP_PIR_KEYWORDS	purine biosynthesis	7	1.22378e+16	3.33276e+09	67054,100046995,229363,11564,108156,11566,23918	550	11	17854	2.06575e+16	1.24971e+11	4.80685e+09	4.60486e+11
GOTERM_BP_FAT	GO:0009260~ribonucleotide biosynthetic process	15	2.62238e+16	3.24088e+10	67054,229363,11564,11566,100046995,11950,432676,11947,11949,19139,71679,11946,11928,23918,11973	477	111	13588	3.84951e+16	0.05470909570616311	0.00124949791834994	0.054785688694758417
GOTERM_BP_FAT	GO:0009152~purine ribonucleotide biosynthetic process	14	2.44755e+16	9.12826e+10	67054,229363,11564,11566,100046995,11950,432676,11947,11949,71679,11946,11928,23918,11973	477	107	13588	3.72719e+16	0.1465546984435061	0.0028771952086341646	0.15423715546606376
GOTERM_BP_FAT	GO:0009156~ribonucleoside monophosphate biosynthetic process	6	1.04895e+15	2.25345e+10	67054,100046995,229363,19139,11566,23918	477	17	13588	1.0054e+16	0.3237841049623177	0.006001042650526811	0.380352097079506
GOTERM_BP_FAT	GO:0009161~ribonucleoside monophosphate metabolic process	6	1.04895e+15	3.99575e+12	67054,100046995,229363,19139,11566,23918	477	19	13588	8.9957e+15	0.5003264846058377	0.009724246846510187	0.6734952340676004
GOTERM_BP_FAT	GO:0009168~purine ribonucleoside monophosphate biosynthetic process	5	0.8741258741258742	8.26304e+11	67054,100046995,229363,11566,23918	477	13	13588	1.09563e+16	0.7618982076445836	0.018001284283489682	1.38805e+16
GOTERM_BP_FAT	GO:0009127~purine nucleoside monophosphate biosynthetic process	5	0.8741258741258742	8.26304e+11	67054,100046995,229363,11566,23918	477	13	13588	1.09563e+16	0.7618982076445836	0.018001284283489682	1.38805e+16
GOTERM_BP_FAT	GO:0009167~purine ribonucleoside monophosphate metabolic process	5	0.8741258741258742	0.0014919506794314574	67054,100046995,229363,11566,23918	477	15	13588	9.49546e+15	0.9251268850768468	0.029353222024334102	249301198973757
GOTERM_BP_FAT	GO:0009126~purine nucleoside monophosphate metabolic process	5	0.8741258741258742	0.0014919506794314574	67054,100046995,229363,11566,23918	477	15	13588	9.49546e+15	0.9251268850768468	0.029353222024334102	249301198973757
GOTERM_BP_FAT	GO:0009124~nucleoside monophosphate biosynthetic process	6	1.04895e+15	0.01993765685804726	67054,100046995,229363,19139,11566,23918	477	45	13588	3.79818e+16	0.9999999999999993	0.25274258758409274	2.88607e+15
GOTERM_BP_FAT	GO:0009123~nucleoside monophosphate metabolic process	6	1.04895e+15	0.055163023960091914	67054,100046995,229363,19139,11566,23918	477	59	13588	2.89692e+16	1.0	0.4978470924169297	6.16901e+15
Annotation Cluster 23	Enrichment Score: 3.162153893102379
Category	Term	Count	%	PValue	Genes	List Total	Pop Hits	Pop Total	Fold Enrichment	Bonferroni	Benjamini	FDR
SP_PIR_KEYWORDS	amino-acid biosynthesis	7	1.22378e+16	3.00951e+11	27053,236539,69051,56454,108156,107272,11898	550	21	17854	1.08206e+15	0.0112223859595324	2.75226e+11	0.041574400025568004
GOTERM_BP_FAT	GO:0046394~carboxylic acid biosynthetic process	17	2.97203e+15	3.42363e+11	27053,19082,13244,232087,108156,107476,14104,105787,236539,69051,13361,56351,21991,56454,14873,107272,11898	477	141	13588	3.43453e+16	0.05770345203002958	0.0012912362271599864	0.0578741961358431
GOTERM_BP_FAT	GO:0016053~organic acid biosynthetic process	17	2.97203e+15	3.42363e+11	27053,19082,13244,232087,108156,107476,14104,105787,236539,69051,13361,56351,21991,56454,14873,107272,11898	477	141	13588	3.43453e+16	0.05770345203002958	0.0012912362271599864	0.0578741961358431
GOTERM_BP_FAT	GO:0008652~cellular amino acid biosynthetic process	9	1.57343e+16	1.24739e+12	27053,236539,13361,69051,232087,56454,108156,107272,11898	477	44	13588	5.82676e+15	0.19471577787951633	0.0037268310438948182	0.21071083817374436
GOTERM_BP_FAT	GO:0009309~amine biosynthetic process	10	1.74825e+16	9.76312e+11	27053,236539,13361,69051,232087,56454,20810,108156,107272,11898	477	73	13588	3.90224e+16	0.816530221989326	0.020717025331360772	1.63808e+16
GOTERM_BP_FAT	GO:0009084~glutamine family amino acid biosynthetic process	3	0.5244755244755245	0.09522264563524033	69051,56454,11898	477	15	13588	569727463312369	1.0	0.6716119315800586	8.15852e+15
GOTERM_BP_FAT	GO:0009066~aspartate family amino acid metabolic process	3	0.5244755244755245	0.17911126282491494	27053,236539,108156	477	22	13588	3.88451e+15	1.0	0.8620028326788997	9.64466e+15
Annotation Cluster 24	Enrichment Score: 2.981244397582176
Category	Term	Count	%	PValue	Genes	List Total	Pop Hits	Pop Total	Fold Enrichment	Bonferroni	Benjamini	FDR
UP_SEQ_FEATURE	repeat:HEAT 6	8	1.3986e+16	1.81101e+11	75751,75786,238799,67088,70572,51792,16211,71902	542	26	16021	9.09509e+15	0.028648639646475016	0.0022334269530568385	0.030332533934929184
UP_SEQ_FEATURE	repeat:HEAT 4	9	1.57343e+16	2.60917e+10	75751,108903,75786,238799,67088,70572,51792,16211,71902	542	37	16021	7.19004e+15	0.04101294746263562	0.0027879534323068667	0.04369804383356213
UP_SEQ_FEATURE	repeat:HEAT 5	8	1.3986e+16	4.98427e+11	75751,75786,238799,67088,70572,51792,16211,71902	542	30	16021	7.88241e+15	0.07688318190320986	0.0044345542540557	0.08346030072434729
UP_SEQ_FEATURE	repeat:HEAT 3	9	1.57343e+16	5.73387e+11	75751,108903,75786,238799,67088,70572,51792,16211,71902	542	41	16021	6.48857e+16	0.08792337216478274	0.004590992561484208	0.09600655506362132
UP_SEQ_FEATURE	repeat:HEAT 8	6	1.04895e+15	1.38182e+11	75786,238799,67088,51792,16211,71902	542	16	16021	1.10846e+16	0.1989229479793958	0.00849441460463185	0.23122210656228992
UP_SEQ_FEATURE	repeat:HEAT 2	9	1.57343e+16	1.84023e+12	75751,108903,75786,238799,67088,70572,51792,16211,71902	542	48	16021	5.54232e+15	0.2557537863339865	0.01088049915788536	0.3078157168378559
UP_SEQ_FEATURE	repeat:HEAT 1	9	1.57343e+16	1.84023e+12	75751,108903,75786,238799,67088,70572,51792,16211,71902	542	48	16021	5.54232e+15	0.2557537863339865	0.01088049915788536	0.3078157168378559
UP_SEQ_FEATURE	repeat:HEAT 7	6	1.04895e+15	5.59678e+11	75786,238799,67088,51792,16211,71902	542	21	16021	8.44544e+15	0.5928341533426472	0.028568954490868714	0.9334134771400548
UP_SEQ_FEATURE	repeat:HEAT 10	4	0.6993006993006993	0.006707776800711363	75786,67088,51792,71902	542	12	16021	98530135301353	0.9999796463836118	0.20533540618510038	1.06619e+16
UP_SEQ_FEATURE	repeat:HEAT 9	4	0.6993006993006993	0.00850383515087947	75786,67088,51792,71902	542	13	16021	9.09509e+15	0.9999988854050466	0.24401601857848587	1.33298e+16
UP_SEQ_FEATURE	repeat:HEAT 15	3	0.5244755244755245	0.010635666884735322	67088,51792,71902	542	5	16021	1.77354e+15	0.9999999647806749	0.2905274114016154	1.63991e+16
UP_SEQ_FEATURE	repeat:HEAT 14	3	0.5244755244755245	0.021353854570459	67088,51792,71902	542	7	16021	126681602530311	0.9999999999999991	0.4798631894767361	3.03425e+15
UP_SEQ_FEATURE	repeat:HEAT 13	3	0.5244755244755245	0.027842231919557953	67088,51792,71902	542	8	16021	1.10846e+16	1.0	0.5484636487469816	3.76876e+15
UP_SEQ_FEATURE	repeat:HEAT 12	3	0.5244755244755245	0.03500792058803558	67088,51792,71902	542	9	16021	98530135301353	1.0	0.6145125197644365	4.49506e+15
UP_SEQ_FEATURE	repeat:HEAT 11	3	0.5244755244755245	0.04279795546088411	67088,51792,71902	542	10	16021	886771217712177	1.0	0.6661077436365783	5.19398e+16
Annotation Cluster 25	Enrichment Score: 2.8704207227632312
Category	Term	Count	%	PValue	Genes	List Total	Pop Hits	Pop Total	Fold Enrichment	Bonferroni	Benjamini	FDR
GOTERM_CC_FAT	GO:0001725~stress fiber	6	1.04895e+15	9.76547e+11	218952,109711,286940,60595,17886,12306	434	23	12504	7.51593e+15	0.3108153965644542	0.006289394611039945	1.34399e+16
GOTERM_CC_FAT	GO:0032432~actin filament bundle	6	1.04895e+15	0.0011988504122611753	218952,109711,286940,60595,17886,12306	434	24	12504	7.20276e+15	0.36684246716011537	0.007344445495045204	1.64759e+16
GOTERM_CC_FAT	GO:0042641~actomyosin	6	1.04895e+15	0.0020906425159745554	218952,109711,286940,60595,17886,12306	434	27	12504	6.40246e+15	0.5494871126898457	0.01101346659635627	2.85681e+15
Annotation Cluster 26	Enrichment Score: 2.6972771013894294
Category	Term	Count	%	PValue	Genes	List Total	Pop Hits	Pop Total	Fold Enrichment	Bonferroni	Benjamini	FDR
UP_SEQ_FEATURE	domain:Actin-binding	7	1.22378e+16	3.4371e+09	20742,11426,68794,109711,286940,60595,192176	542	14	16021	1.47795e+16	0.005501367584948569	6.89332e+11	0.005757441621023762
UP_SEQ_FEATURE	domain:CH 2	7	1.22378e+16	5.07457e+10	20742,11426,68794,109711,286940,60595,192176	542	21	16021	9.85301e+15	0.07822022147206498	0.004277610946591293	0.08497180865233434
UP_SEQ_FEATURE	domain:CH 1	7	1.22378e+16	5.07457e+10	20742,11426,68794,109711,286940,60595,192176	542	21	16021	9.85301e+15	0.07822022147206498	0.004277610946591293	0.08497180865233434
UP_SEQ_FEATURE	region of interest:Self-association site, tail	3	0.5244755244755245	0.0033381608505397855	68794,286940,192176	542	3	16021	295590405904059	0.9953305343173191	0.11995199731563111	5.44723e+15
UP_SEQ_FEATURE	region of interest:Hinge 2	3	0.5244755244755245	0.0033381608505397855	68794,286940,192176	542	3	16021	295590405904059	0.9953305343173191	0.11995199731563111	5.44723e+15
UP_SEQ_FEATURE	repeat:Filamin 14	3	0.5244755244755245	0.0033381608505397855	68794,286940,192176	542	3	16021	295590405904059	0.9953305343173191	0.11995199731563111	5.44723e+15
UP_SEQ_FEATURE	repeat:Filamin 13	3	0.5244755244755245	0.0033381608505397855	68794,286940,192176	542	3	16021	295590405904059	0.9953305343173191	0.11995199731563111	5.44723e+15
UP_SEQ_FEATURE	repeat:Filamin 12	3	0.5244755244755245	0.0033381608505397855	68794,286940,192176	542	3	16021	295590405904059	0.9953305343173191	0.11995199731563111	5.44723e+15
UP_SEQ_FEATURE	repeat:Filamin 11	3	0.5244755244755245	0.0033381608505397855	68794,286940,192176	542	3	16021	295590405904059	0.9953305343173191	0.11995199731563111	5.44723e+15
UP_SEQ_FEATURE	repeat:Filamin 10	3	0.5244755244755245	0.0033381608505397855	68794,286940,192176	542	3	16021	295590405904059	0.9953305343173191	0.11995199731563111	5.44723e+15
UP_SEQ_FEATURE	repeat:Filamin 1	3	0.5244755244755245	0.0033381608505397855	68794,286940,192176	542	3	16021	295590405904059	0.9953305343173191	0.11995199731563111	5.44723e+15
UP_SEQ_FEATURE	repeat:Filamin 21	3	0.5244755244755245	0.0033381608505397855	68794,286940,192176	542	3	16021	295590405904059	0.9953305343173191	0.11995199731563111	5.44723e+15
UP_SEQ_FEATURE	repeat:Filamin 20	3	0.5244755244755245	0.0033381608505397855	68794,286940,192176	542	3	16021	295590405904059	0.9953305343173191	0.11995199731563111	5.44723e+15
UP_SEQ_FEATURE	repeat:Filamin 2	3	0.5244755244755245	0.0033381608505397855	68794,286940,192176	542	3	16021	295590405904059	0.9953305343173191	0.11995199731563111	5.44723e+15
UP_SEQ_FEATURE	repeat:Filamin 19	3	0.5244755244755245	0.0033381608505397855	68794,286940,192176	542	3	16021	295590405904059	0.9953305343173191	0.11995199731563111	5.44723e+15
UP_SEQ_FEATURE	repeat:Filamin 18	3	0.5244755244755245	0.0033381608505397855	68794,286940,192176	542	3	16021	295590405904059	0.9953305343173191	0.11995199731563111	5.44723e+15
UP_SEQ_FEATURE	repeat:Filamin 17	3	0.5244755244755245	0.0033381608505397855	68794,286940,192176	542	3	16021	295590405904059	0.9953305343173191	0.11995199731563111	5.44723e+15
UP_SEQ_FEATURE	repeat:Filamin 16	3	0.5244755244755245	0.0033381608505397855	68794,286940,192176	542	3	16021	295590405904059	0.9953305343173191	0.11995199731563111	5.44723e+15
UP_SEQ_FEATURE	repeat:Filamin 15	3	0.5244755244755245	0.0033381608505397855	68794,286940,192176	542	3	16021	295590405904059	0.9953305343173191	0.11995199731563111	5.44723e+15
UP_SEQ_FEATURE	repeat:Filamin 6	3	0.5244755244755245	0.0033381608505397855	68794,286940,192176	542	3	16021	295590405904059	0.9953305343173191	0.11995199731563111	5.44723e+15
UP_SEQ_FEATURE	repeat:Filamin 7	3	0.5244755244755245	0.0033381608505397855	68794,286940,192176	542	3	16021	295590405904059	0.9953305343173191	0.11995199731563111	5.44723e+15
UP_SEQ_FEATURE	repeat:Filamin 4	3	0.5244755244755245	0.0033381608505397855	68794,286940,192176	542	3	16021	295590405904059	0.9953305343173191	0.11995199731563111	5.44723e+15
UP_SEQ_FEATURE	repeat:Filamin 5	3	0.5244755244755245	0.0033381608505397855	68794,286940,192176	542	3	16021	295590405904059	0.9953305343173191	0.11995199731563111	5.44723e+15
UP_SEQ_FEATURE	repeat:Filamin 24	3	0.5244755244755245	0.0033381608505397855	68794,286940,192176	542	3	16021	295590405904059	0.9953305343173191	0.11995199731563111	5.44723e+15
UP_SEQ_FEATURE	repeat:Filamin 3	3	0.5244755244755245	0.0033381608505397855	68794,286940,192176	542	3	16021	295590405904059	0.9953305343173191	0.11995199731563111	5.44723e+15
UP_SEQ_FEATURE	repeat:Filamin 22	3	0.5244755244755245	0.0033381608505397855	68794,286940,192176	542	3	16021	295590405904059	0.9953305343173191	0.11995199731563111	5.44723e+15
UP_SEQ_FEATURE	repeat:Filamin 23	3	0.5244755244755245	0.0033381608505397855	68794,286940,192176	542	3	16021	295590405904059	0.9953305343173191	0.11995199731563111	5.44723e+15
UP_SEQ_FEATURE	region of interest:Hinge 1	3	0.5244755244755245	0.0033381608505397855	68794,286940,192176	542	3	16021	295590405904059	0.9953305343173191	0.11995199731563111	5.44723e+15
UP_SEQ_FEATURE	repeat:Filamin 8	3	0.5244755244755245	0.0033381608505397855	68794,286940,192176	542	3	16021	295590405904059	0.9953305343173191	0.11995199731563111	5.44723e+15
UP_SEQ_FEATURE	repeat:Filamin 9	3	0.5244755244755245	0.0033381608505397855	68794,286940,192176	542	3	16021	295590405904059	0.9953305343173191	0.11995199731563111	5.44723e+15
Annotation Cluster 27	Enrichment Score: 2.6903476759752114
Category	Term	Count	%	PValue	Genes	List Total	Pop Hits	Pop Total	Fold Enrichment	Bonferroni	Benjamini	FDR
GOTERM_CC_FAT	GO:0044449~contractile fiber part	11	1.92308e+16	7.52714e+11	20740,70361,20742,12387,68794,11464,109711,286940,13346,22330,12345	434	86	12504	3.68514e+16	0.24940720805774885	0.005202637256155884	103742602556548
GOTERM_CC_FAT	GO:0030016~myofibril	11	1.92308e+16	0.001172099622868256	20740,70361,20742,12387,68794,11464,109711,286940,13346,22330,12345	434	91	12504	3.48266e+15	0.360348558236367	0.007298349425909456	1.6111e+16
GOTERM_CC_FAT	GO:0043292~contractile fiber	11	1.92308e+16	0.0016305425553607483	20740,70361,20742,12387,68794,11464,109711,286940,13346,22330,12345	434	95	12504	333601746301237	0.46299278095137897	0.009101617539392981	2.23467e+15
GOTERM_CC_FAT	GO:0030017~sarcomere	10	1.74825e+16	0.0017318175696188918	20740,70361,20742,12387,68794,11464,109711,286940,13346,12345	434	80	12504	3.60138e+15	0.4833525234673345	0.009525279166990752	2.37193e+16
GOTERM_CC_FAT	GO:0031674~I band	8	1.3986e+16	0.0022129462093923085	20740,12387,68794,11464,109711,286940,13346,12345	434	53	12504	4.34884e+15	0.5700415865240783	0.011495969250346016	3.02157e+16
GOTERM_CC_FAT	GO:0030018~Z disc	7	1.22378e+16	0.0048253538822308085	20740,12387,68794,109711,286940,13346,12345	434	46	12504	4.38429e+15	0.841644022734155	0.022223838888939307	6.47948e+15
GOTERM_CC_FAT	GO:0014704~intercalated disc	4	0.6993006993006993	0.005528884043227061	20740,12387,22330,12345	434	11	12504	1.04767e+16	0.8790465701311659	0.024544924487290176	7.39095e+15
Annotation Cluster 28	Enrichment Score: 2.6771852454808687
Category	Term	Count	%	PValue	Genes	List Total	Pop Hits	Pop Total	Fold Enrichment	Bonferroni	Benjamini	FDR
GOTERM_BP_FAT	GO:0015980~energy derivation by oxidation of organic compounds	13	2.27273e+15	1.56706e+12	18432,17709,67834,269951,15926,22273,11429,56351,67680,227197,19046,66945,19045	477	98	13588	3.7788e+15	0.2381935818315033	0.0045241152191513034	0.26464303268084466
GOTERM_BP_FAT	GO:0045333~cellular respiration	10	1.74825e+16	1.94733e+12	18432,17709,11429,67834,67680,227197,269951,15926,66945,22273	477	59	13588	4.8282e+15	0.2868683955735567	0.005268716635112969	0.3287631581422201
SP_PIR_KEYWORDS	tricarboxylic acid cycle	6	1.04895e+15	2.1944e+12	11429,67834,67680,269951,15926,66945	550	19	17854	102511004784689	0.0790033611630061	0.001827192918002818	0.30277387129349354
GOTERM_BP_FAT	GO:0006084~acetyl-CoA metabolic process	7	1.22378e+16	6.25142e+11	11429,104112,67834,67680,269951,15926,66945	477	31	13588	6.43241e+15	0.6622963268393867	0.01437023455460551	1.05181e+16
GOTERM_BP_FAT	GO:0006099~tricarboxylic acid cycle	6	1.04895e+15	0.0010298876287544428	11429,67834,67680,269951,15926,66945	477	23	13588	7.43123e+15	0.8328403970051794	0.021578489979060644	172723715967531
GOTERM_BP_FAT	GO:0046356~acetyl-CoA catabolic process	6	1.04895e+15	0.0012638831512978483	11429,67834,67680,269951,15926,66945	477	24	13588	7.12159e+15	0.8886958643585827	0.025498558436581775	2.11574e+16
GOTERM_BP_FAT	GO:0006732~coenzyme metabolic process	14	2.44755e+16	0.0015434798727663231	14870,59027,67834,108156,269951,14630,15926,66171,104112,11429,21991,67680,110208,66945	477	143	13588	2.78888e+16	0.9315431084278482	0.029680409590290724	2.57806e+15
GOTERM_BP_FAT	GO:0009060~aerobic respiration	6	1.04895e+15	0.0022017065579077247	11429,67834,67680,269951,15926,66945	477	27	13588	6.33031e+15	0.978211574944438	0.040308914628459314	3.65836e+15
GOTERM_BP_FAT	GO:0009109~coenzyme catabolic process	6	1.04895e+15	0.003057733083815087	11429,67834,67680,269951,15926,66945	477	29	13588	5.89373e+15	0.9950893883963238	0.05333292189484773	5.04644e+15
GOTERM_BP_FAT	GO:0051187~cofactor catabolic process	6	1.04895e+15	0.0047575030934312885	11429,67834,67680,269951,15926,66945	477	32	13588	5.34119e+15	0.999746141637364	0.07869825066220204	7.74708e+15
UP_SEQ_FEATURE	site:Critical for catalysis	3	0.5244755244755245	0.00652698311323527	67834,269951,15926	542	4	16021	2.21693e+15	0.9999727414984261	0.2042589142777329	103891667090659
GOTERM_BP_FAT	GO:0051186~cofactor metabolic process	14	2.44755e+16	0.011809904964593458	14870,59027,67834,108156,269951,14630,15926,66171,104112,11429,21991,67680,110208,66945	477	182	13588	2.19126e+16	0.9999999988956623	0.16682656352531477	1.81991e+15
GOTERM_MF_FAT	GO:0004448~isocitrate dehydrogenase activity	3	0.5244755244755245	0.01780418220366431	67834,269951,15926	482	6	13288	1.37842e+16	0.9999784000781744	0.23552849081583793	2.32949e+15
UP_SEQ_FEATURE	metal ion-binding site:Magnesium or manganese	3	0.5244755244755245	0.08944807664499688	67834,269951,15926	542	15	16021	5.91181e+15	1.0	0.8509897762282501	7.91887e+15
Annotation Cluster 29	Enrichment Score: 2.6642786368228553
Category	Term	Count	%	PValue	Genes	List Total	Pop Hits	Pop Total	Fold Enrichment	Bonferroni	Benjamini	FDR
SP_PIR_KEYWORDS	electron transport	14	2.44755e+16	1.17396e+11	72736,17709,53382,68349,66445,22273,110826,66108,67273,110842,67003,67680,227197,66945	550	100	17854	4.54465e+15	0.004392695488516063	1.12875e+12	0.016219377739434826
GOTERM_BP_FAT	GO:0022900~electron transport chain	15	2.62238e+16	3.58746e+10	72736,18432,17709,53382,68349,66445,22273,110826,66108,67273,110842,67003,67680,227197,66945	477	112	13588	3.81514e+16	0.060379644684609435	0.0013242152739169066	0.06064277174265831
SP_PIR_KEYWORDS	respiratory chain	8	1.3986e+16	0.0028485334956516676	17709,66108,67273,68349,67003,66445,227197,22273	550	62	17854	4.18862e+15	0.6568969220158244	0.016836408190238683	3.86477e+15
GOTERM_CC_FAT	GO:0070469~respiratory chain	8	1.3986e+16	0.007015136448024939	17709,66108,67273,68349,67003,66445,227197,22273	434	65	12504	354597660404112	0.9315865595210108	0.03001957304420899	928947097116678
GOTERM_BP_FAT	GO:0022904~respiratory electron transport chain	4	0.6993006993006993	0.07329860325251777	18432,17709,227197,22273	477	28	13588	4.06948e+15	1.0	0.5880774256529884	7.2395e+15
SP_PIR_KEYWORDS	ubiquinone	3	0.5244755244755245	0.1675465483192799	66108,68349,227197	550	24	17854	4.05773e+15	1.0	0.5042588808535906	9.20638e+15
Annotation Cluster 30	Enrichment Score: 2.6132264329700523
Category	Term	Count	%	PValue	Genes	List Total	Pop Hits	Pop Total	Fold Enrichment	Bonferroni	Benjamini	FDR
GOTERM_MF_FAT	GO:0048037~cofactor binding	19	3.32168e+16	0.0014937247189185303	26926,11657,22235,67834,269951,18984,15926,14104,100042025,18293,108037,236539,13361,97212,66108,110842,433184,110208,107272,66945	482	226	13288	2.3177e+15	0.5909488950829178	0.03379703009879198	2.18259e+16
GOTERM_MF_FAT	GO:0050662~coenzyme binding	15	2.62238e+16	0.0020224380941257555	26926,22235,67834,269951,18984,15926,100042025,18293,236539,13361,97212,66108,110842,433184,110208,66945	482	160	13288	2.58454e+16	0.7019942860205615	0.04231583439556419	2.94443e+16
GOTERM_MF_FAT	GO:0051287~NAD or NADH binding	7	1.22378e+16	0.00478822881849786	236539,22235,97212,433184,67834,269951,15926,100042025	482	44	13288	4.38589e+15	0.9433145666502387	0.0884313049456058	6.84039e+15
Annotation Cluster 31	Enrichment Score: 2.574435726902853
Category	Term	Count	%	PValue	Genes	List Total	Pop Hits	Pop Total	Fold Enrichment	Bonferroni	Benjamini	FDR
GOTERM_CC_FAT	GO:0031974~membrane-enclosed lumen	66	1.15385e+16	8.95149e+09	83701,230233,68263,11737,223691,320011,11674,13211,16905,72416,71514,12304,26754,110842,12567,269261,192159,53890,227197,19045,19184,15387,15388,18451,11669,12387,15382,13207,14828,14827,13205,72662,18293,59013,52377,67273,18538,16004,108000,12261,26926,22027,21849,76479,12321,110826,20020,19672,107094,245688,66108,12406,18148,23942,21355,216443,18432,19988,12631,17184,15510,97212,19983,98758,718…	434	1174	12504	1.6197e+16	0.03353162488428796	7.5764e+11	0.12390013775201991
GOTERM_CC_FAT	GO:0043233~organelle lumen	63	1.1014e+16	1.99282e+11	83701,230233,68263,11737,223691,320011,11674,13211,16905,71514,72416,12304,26754,110842,269261,12567,192159,53890,19045,19184,15387,15388,18451,11669,12387,15382,13207,14828,14827,13205,72662,18293,59013,52377,67273,18538,108000,12261,22027,21849,76479,12321,110826,20020,19672,107094,245688,66108,12406,18148,23942,21355,216443,18432,19988,12631,17184,15510,97212,19983,98758,71853,56086	434	1136	12504	1.5978e+16	0.0731225830068527	0.0016143117312769073	0.2756373469493423
GOTERM_CC_FAT	GO:0070013~intracellular organelle lumen	62	1.08392e+16	3.23325e+11	83701,230233,68263,11737,223691,320011,13211,16905,71514,72416,12304,26754,110842,269261,12567,192159,53890,19045,19184,15387,15388,18451,11669,12387,15382,13207,14828,14827,13205,72662,18293,59013,52377,67273,18538,108000,12261,22027,21849,76479,12321,110826,20020,19672,107094,245688,66108,12406,18148,23942,21355,216443,18432,19988,12631,17184,15510,97212,19983,98758,71853,56086	434	1133	12504	1.5766e+16	0.11591905784617007	0.0025112630616188625	0.44685156682511273
GOTERM_CC_FAT	GO:0031981~nuclear lumen	40	6.99301e+15	0.06910585284776076	83701,230233,11737,223691,21849,76479,13211,16905,71514,72416,20020,107094,245688,26754,18148,269261,12567,192159,53890,23942,19045,19184,216443,18432,15387,15388,12387,15382,13207,19988,13205,72662,12631,59013,17184,19983,18538,98758,108000,56086	434	883	12504	1.30514e+16	0.9999999999985841	0.21791783839751044	6.2907e+15
GOTERM_CC_FAT	GO:0005654~nucleoplasm	24	4.1958e+15	0.33674755890957503	83701,15387,15388,230233,12387,15382,223691,21849,13205,76479,72416,59013,20020,245688,18148,26754,12567,192159,53890,98758,23942,19045,19184,56086	434	599	12504	1.15437e+16	1.0	0.7082327303988649	9.96609e+15
Annotation Cluster 32	Enrichment Score: 2.4199394987348666
Category	Term	Count	%	PValue	Genes	List Total	Pop Hits	Pop Total	Fold Enrichment	Bonferroni	Benjamini	FDR
GOTERM_CC_FAT	GO:0005912~adherens junction	16	2.7972e+15	3.5033e+08	22323,218952,20740,22793,12387,109711,286940,17886,22330,21894,12343,110829,12558,12385,16796,76709	434	106	12504	4.34884e+15	0.0013338691869884123	4.17104e+10	0.004851698005181593
GOTERM_CC_FAT	GO:0070161~anchoring junction	16	2.7972e+15	2.21312e+11	22323,218952,20740,22793,12387,109711,286940,17886,22330,21894,12343,110829,12558,12385,16796,76709	434	123	12504	3.74778e+16	0.008396633565175393	2.27868e+12	0.030645704634124638
GOTERM_CC_FAT	GO:0005925~focal adhesion	11	1.92308e+16	2.24303e+11	22323,218952,110829,22793,109711,286940,22330,21894,16796,76709,12343	434	57	12504	5.56003e+15	0.00850964509048302	2.24871e+12	0.031059872813621325
GOTERM_CC_FAT	GO:0005924~cell-substrate adherens junction	11	1.92308e+16	4.13915e+10	22323,218952,110829,22793,109711,286940,22330,21894,16796,76709,12343	434	61	12504	5.19544e+15	0.015646797198293205	3.84572e+11	0.05730892311005542
GOTERM_CC_FAT	GO:0030055~cell-substrate junction	11	1.92308e+16	8.29859e+10	22323,218952,110829,22793,109711,286940,22330,21894,16796,76709,12343	434	66	12504	4.80184e+16	0.031124278264731964	7.18354e+11	0.11486794673043477
GOTERM_CC_FAT	GO:0016323~basolateral plasma membrane	13	2.27273e+15	0.0036113613394716613	218952,22323,22793,12387,109711,286940,21894,22330,12343,110829,16796,76709,11928	434	141	12504	2.65634e+16	0.7480234259671024	0.017297002890941826	4.88706e+15
GOTERM_CC_FAT	GO:0030054~cell junction	21	3.67133e+16	0.20012698563082962	22323,218952,20740,22793,12387,109711,286940,17886,22330,21894,12345,20430,12343,22288,110829,12558,12385,66395,16796,76709,12306	434	470	12504	1.2873e+15	1.0	0.5021030186808761	9.54615e+15
SP_PIR_KEYWORDS	cell adhesion	10	1.74825e+16	0.8302305018137668	218952,13722,21825,22793,12387,12558,12385,12555,22330,12552	550	380	17854	0.8542583732057415	1.0	0.9913478487557538	1e+16
GOTERM_BP_FAT	GO:0007155~cell adhesion	17	2.97203e+15	0.8348569082439022	19944,218952,22793,12387,23837,17886,22330,21894,19353,110829,21825,13722,12558,12385,12555,23950,12552	477	561	13588	0.863223429261165	1.0	0.999935542008275	1e+16
GOTERM_BP_FAT	GO:0022610~biological adhesion	17	2.97203e+15	0.8368170470154085	19944,218952,22793,12387,23837,17886,22330,21894,19353,110829,21825,13722,12558,12385,12555,23950,12552	477	562	13588	0.86168744451159	1.0	0.9999358240228056	1e+16
SP_PIR_KEYWORDS	cell junction	8	1.3986e+16	0.9594304806398619	22323,218952,110829,22793,12387,12385,22330,20430	550	392	17854	0.6624860853432282	1.0	0.999668487692563	100.0
Annotation Cluster 33	Enrichment Score: 2.3479011230080005
Category	Term	Count	%	PValue	Genes	List Total	Pop Hits	Pop Total	Fold Enrichment	Bonferroni	Benjamini	FDR
GOTERM_BP_FAT	GO:0044271~nitrogen compound biosynthetic process	30	5.24476e+15	8.68996e+08	229363,232087,59027,69719,51797,56454,20810,11947,11949,71679,107272,11898,11946,11928,27053,67054,11564,108156,11566,100046995,236539,13361,69051,11950,15452,432676,19139,15519,23918,11973	477	302	13588	2.82977e+16	0.0015074398544320244	7.93956e+10	0.0014693692458322971
GOTERM_BP_FAT	GO:0034654~nucleobase, nucleoside, nucleotide and nucleic acid biosynthetic process	21	3.67133e+16	4.66224e+09	67054,229363,59027,11564,108156,11566,69719,51797,100046995,13361,11950,15452,432676,11947,11949,19139,71679,23918,11928,11946,11973	477	179	13588	3.34198e+15	0.008060998228086591	2.9972e+11	0.007883056508128927
GOTERM_BP_FAT	GO:0034404~nucleobase, nucleoside and nucleotide biosynthetic process	21	3.67133e+16	4.66224e+09	67054,229363,59027,11564,108156,11566,69719,51797,100046995,13361,11950,15452,432676,11947,11949,19139,71679,23918,11928,11946,11973	477	179	13588	3.34198e+15	0.008060998228086591	2.9972e+11	0.007883056508128927
GOTERM_BP_FAT	GO:0009259~ribonucleotide metabolic process	17	2.97203e+15	7.40458e+09	67054,229363,11564,11566,100046995,11950,432676,11947,227197,11949,19139,71679,11636,23918,11928,11946,11973	477	125	13588	3.87415e+16	0.012772129945894606	4.28388e+11	0.012519617153772256
GOTERM_BP_FAT	GO:0009165~nucleotide biosynthetic process	20	3.4965e+16	1.12298e+11	67054,229363,59027,11564,108156,11566,51797,100046995,13361,11950,15452,432676,11947,11949,19139,71679,23918,11928,11946,11973	477	174	13588	327429576616304	0.01930623383809038	5.56846e+11	0.01898669378278539
GOTERM_BP_FAT	GO:0009150~purine ribonucleotide metabolic process	16	2.7972e+15	1.71661e+10	67054,229363,11564,11566,100046995,11950,432676,11947,227197,11949,71679,11636,23918,11946,11928,11973	477	119	13588	3.8301e+15	0.029360952996530076	7.44738e+11	0.029022095797281988
GOTERM_BP_FAT	GO:0009260~ribonucleotide biosynthetic process	15	2.62238e+16	3.24088e+10	67054,229363,11564,11566,100046995,11950,432676,11947,11949,19139,71679,11946,11928,23918,11973	477	111	13588	3.84951e+16	0.05470909570616311	0.00124949791834994	0.054785688694758417
GOTERM_BP_FAT	GO:0006163~purine nucleotide metabolic process	18	3.14685e+15	4.59493e+10	67054,229363,11564,108156,11566,100046995,11950,15452,432676,11947,227197,11949,71679,11636,23918,11928,11946,11973	477	160	13588	3.20472e+15	0.07667112231023288	0.001626630581447186	0.07766697059312655
GOTERM_BP_FAT	GO:0006164~purine nucleotide biosynthetic process	16	2.7972e+15	9.04698e+10	67054,229363,11564,108156,11566,100046995,11950,15452,432676,11947,11949,71679,23918,11946,11928,11973	477	137	13588	3.32688e+15	0.14534957765659007	0.0029043437726686827	0.15286485988501575
GOTERM_BP_FAT	GO:0009152~purine ribonucleotide biosynthetic process	14	2.44755e+16	9.12826e+10	67054,229363,11564,11566,100046995,11950,432676,11947,11949,71679,11946,11928,23918,11973	477	107	13588	3.72719e+16	0.1465546984435061	0.0028771952086341646	0.15423715546606376
GOTERM_CC_FAT	GO:0045259~proton-transporting ATP synthase complex	6	1.04895e+15	3.78336e+12	11950,11947,432676,11949,71679,11946	434	19	12504	909822944457919	0.13426239489277347	0.0027687256193272836	0.5226957010624922
GOTERM_BP_FAT	GO:0006119~oxidative phosphorylation	9	1.57343e+16	6.92343e+11	11950,11947,432676,227197,11949,71679,11946,22273,11973	477	56	13588	4.57817e+15	0.6995046104143888	0.015493307142625867	1.16425e+16
GOTERM_CC_FAT	GO:0045261~proton-transporting ATP synthase complex, catalytic core F(1)	4	0.6993006993006993	7.62855e+10	11947,432676,11949,11946	434	6	12504	1.92074e+16	0.25230400418121346	0.005178665776473745	1.05133e+15
GOTERM_BP_FAT	GO:0015985~energy coupled proton transport, down electrochemical gradient	7	1.22378e+16	0.0016528322623766347	11950,11947,432676,11949,71679,11946,11973	477	37	13588	5.38931e+15	0.9433968517923372	0.03140399559704188	2.75832e+16
GOTERM_BP_FAT	GO:0015986~ATP synthesis coupled proton transport	7	1.22378e+16	0.0016528322623766347	11950,11947,432676,11949,71679,11946,11973	477	37	13588	5.38931e+15	0.9433968517923372	0.03140399559704188	2.75832e+16
GOTERM_MF_FAT	GO:0046961~proton-transporting ATPase activity, rotational mechanism	5	0.8741258741258742	0.0016836112611165138	11947,432676,11949,11946,11973	482	15	13288	9.18949e+15	0.6349233750786056	0.03663247769747657	2.45684e+16
GOTERM_CC_FAT	GO:0033178~proton-transporting two-sector ATPase complex, catalytic domain	5	0.8741258741258742	0.002357301025707098	11947,432676,11949,11946,11973	434	17	12504	8.47384e+15	0.5931016750998566	0.011917641473814578	3.2157e+15
SP_PIR_KEYWORDS	Hydrogen ion transport	7	1.22378e+16	0.002418437748535241	11950,11947,432676,11949,71679,11946,11973	550	45	17854	5.04962e+15	0.5966749977134607	0.015019606495120574	3.29026e+15
GOTERM_CC_FAT	GO:0016469~proton-transporting two-sector ATPase complex	7	1.22378e+16	0.003034867668416955	11950,11947,432676,11949,71679,11946,11973	434	42	12504	4.80184e+16	0.6858996396113973	0.01473703274032212	4.12209e+15
GOTERM_BP_FAT	GO:0034220~ion transmembrane transport	7	1.22378e+16	0.003218616597230398	11950,11947,432676,11949,71679,11946,11973	477	42	13588	4.74773e+15	0.9962892816429098	0.05550741886302102	530520588168204
SP_PIR_KEYWORDS	atp synthesis	4	0.6993006993006993	0.003967343136198385	11947,432676,11949,11946	550	11	17854	1.18043e+16	0.77478791476347	0.022673055667071118	5.34447e+15
GOTERM_BP_FAT	GO:0046034~ATP metabolic process	10	1.74825e+16	0.004214596328613556	11950,11947,432676,227197,11949,71679,11636,11928,11946,11973	477	90	13588	3.16515e+16	0.9993457367825728	0.07069660221708729	6.89245e+15
GOTERM_MF_FAT	GO:0046933~hydrogen ion transporting ATP synthase activity, rotational mechanism	4	0.6993006993006993	0.006258804521209914	11947,432676,11949,11946	482	11	13288	1.00249e+16	0.9765884742190934	0.10454853659607666	8.85203e+15
SP_PIR_KEYWORDS	cf(1)	3	0.5244755244755245	0.008873318835689734	11947,11949,11946	550	5	17854	1.94771e+15	0.9646460601342254	0.04536046922525361	1.15869e+15
GOTERM_BP_FAT	GO:0009205~purine ribonucleoside triphosphate metabolic process	10	1.74825e+16	0.008908837477549385	11950,11947,432676,227197,11949,71679,11636,11928,11946,11973	477	101	13588	2.82043e+15	0.9999998208504067	0.13397630221140888	1.40422e+16
GOTERM_BP_FAT	GO:0015992~proton transport	7	1.22378e+16	0.009318639535358008	11950,11947,432676,11949,71679,11946,11973	477	52	13588	3.8347e+15	0.9999999126204308	0.1385257658473571	1.46412e+16
GOTERM_BP_FAT	GO:0009199~ribonucleoside triphosphate metabolic process	10	1.74825e+16	0.009478133936970688	11950,11947,432676,227197,11949,71679,11636,11928,11946,11973	477	102	13588	2.79278e+16	0.999999933927523	0.13954639216712428	1.48733e+16
GOTERM_BP_FAT	GO:0006818~hydrogen transport	7	1.22378e+16	0.01020610607290627	11950,11947,432676,11949,71679,11946,11973	477	53	13588	3.76235e+15	0.9999999815616841	0.1482310330997243	1.5925e+15
GOTERM_MF_FAT	GO:0019829~cation-transporting ATPase activity	5	0.8741258741258742	0.011723803269917678	11947,432676,11949,11946,11973	482	25	13288	551369294605809	0.9991345450497288	0.1735381264936724	1.59783e+16
GOTERM_BP_FAT	GO:0009144~purine nucleoside triphosphate metabolic process	10	1.74825e+16	0.012033594742910964	11950,11947,432676,227197,11949,71679,11636,11928,11946,11973	477	106	13588	2.68739e+15	0.9999999992545483	0.16836357237943278	1.85116e+16
GOTERM_MF_FAT	GO:0015077~monovalent inorganic cation transmembrane transporter activity	9	1.57343e+16	0.013354261265459492	11950,17709,11947,432676,11949,71679,11928,11946,11973	482	87	13288	2.85191e+16	0.99967757832417	0.18628482324698337	1.80016e+16
GOTERM_BP_FAT	GO:0009141~nucleoside triphosphate metabolic process	10	1.74825e+16	0.01961899665871344	11950,11947,432676,227197,11949,71679,11636,11928,11946,11973	477	115	13588	2.47708e+16	0.9999999999999989	0.25102625672107415	2.84686e+15
GOTERM_BP_FAT	GO:0006754~ATP biosynthetic process	8	1.3986e+16	0.02466717614376188	11950,11947,432676,11949,71679,11928,11946,11973	477	82	13588	2.77916e+16	1.0	0.2854611961160889	3.4448e+16
GOTERM_MF_FAT	GO:0015078~hydrogen ion transmembrane transporter activity	8	1.3986e+16	0.028803355805746257	11950,17709,11947,432676,11949,71679,11946,11973	482	82	13288	2.68961e+16	0.9999999743144118	0.3339893843413465	3.50436e+15
GOTERM_MF_FAT	GO:0015405~P-P-bond-hydrolysis-driven transmembrane transporter activity	9	1.57343e+16	0.04019841190687701	53421,11947,432676,21354,11949,21355,11928,11946,11973	482	107	13288	231884282778144	0.9999999999778937	0.4001940891000674	4.543e+15
GOTERM_MF_FAT	GO:0015399~primary active transmembrane transporter activity	9	1.57343e+16	0.042104531078938426	53421,11947,432676,21354,11949,21355,11928,11946,11973	482	108	13288	2.29737e+16	0.9999999999932666	0.40843182957391644	4.70082e+16
GOTERM_BP_FAT	GO:0009201~ribonucleoside triphosphate biosynthetic process	8	1.3986e+16	0.044535970468424016	11950,11947,432676,11949,71679,11928,11946,11973	477	93	13588	2.45044e+16	1.0	0.44096127615578573	5.37144e+15
GOTERM_BP_FAT	GO:0009206~purine ribonucleoside triphosphate biosynthetic process	8	1.3986e+16	0.044535970468424016	11950,11947,432676,11949,71679,11928,11946,11973	477	93	13588	2.45044e+16	1.0	0.44096127615578573	5.37144e+15
GOTERM_BP_FAT	GO:0009145~purine nucleoside triphosphate biosynthetic process	8	1.3986e+16	0.046736444492306434	11950,11947,432676,11949,71679,11928,11946,11973	477	94	13588	2.42437e+15	1.0	0.4499696024478985	5.54842e+16
GOTERM_BP_FAT	GO:0009142~nucleoside triphosphate biosynthetic process	8	1.3986e+16	0.049005256196513955	11950,11947,432676,11949,71679,11928,11946,11973	477	95	13588	2.39885e+16	1.0	0.46369895210430123	5.72422e+15
GOTERM_MF_FAT	GO:0043492~ATPase activity, coupled to movement of substances	8	1.3986e+16	0.06189547451307278	11947,432676,21354,11949,21355,11928,11946,11973	482	97	13288	2.27369e+16	1.0	0.48845795404665493	6.10633e+15
GOTERM_MF_FAT	GO:0042626~ATPase activity, coupled to transmembrane movement of substances	8	1.3986e+16	0.06189547451307278	11947,432676,21354,11949,21355,11928,11946,11973	482	97	13288	2.27369e+16	1.0	0.48845795404665493	6.10633e+15
GOTERM_MF_FAT	GO:0016820~hydrolase activity, acting on acid anhydrides, catalyzing transmembrane movement of substances	8	1.3986e+16	0.06189547451307278	11947,432676,21354,11949,21355,11928,11946,11973	482	97	13288	2.27369e+16	1.0	0.48845795404665493	6.10633e+15
GOTERM_BP_FAT	GO:0055085~transmembrane transport	23	4.02098e+15	0.08585406674983415	94280,53421,11739,66525,22333,71805,69482,19386,11740,22335,22334,11950,18674,14057,432676,11947,21354,11949,227699,71679,21355,11946,11973	477	460	13588	1.42432e+16	1.0	0.638867625486147	7.80813e+15
GOTERM_MF_FAT	GO:0022890~inorganic cation transmembrane transporter activity	9	1.57343e+16	0.08994653406140912	11950,17709,11947,432676,11949,71679,11928,11946,11973	482	127	13288	1.95367e+16	1.0	0.6030630834958148	7.51272e+15
GOTERM_MF_FAT	GO:0042625~ATPase activity, coupled to transmembrane movement of ions	6	1.04895e+15	0.10425219545085355	11947,432676,11949,11928,11946,11973	482	69	13288	2.39726e+16	1.0	0.642533272945804	8.03147e+15
GOTERM_MF_FAT	GO:0015662~ATPase activity, coupled to transmembrane movement of ions, phosphorylative mechanism	3	0.5244755244755245	0.6165795899845952	11947,11928,11973	482	57	13288	1.45097e+15	1.0	0.996375951680513	9.99999e+15
SP_PIR_KEYWORDS	ion transport	16	2.7972e+15	0.7013587269307475	94280,22333,22335,29876,22334,11950,14057,432676,11947,11949,16796,71679,11946,11928,114584,11973	550	543	17854	0.9565176628160054	1.0	0.9718002306681783	1e+16
GOTERM_BP_FAT	GO:0015672~monovalent inorganic cation transport	8	1.3986e+16	0.9105306900499563	11950,11947,432676,11949,71679,11928,11946,11973	477	303	13588	0.752115463118639	1.0	0.9999890058577338	100.0
GOTERM_BP_FAT	GO:0006811~ion transport	19	3.32168e+16	0.946127476101625	94280,11739,22333,22335,29876,22334,12343,12729,11950,14057,432676,11947,11949,16796,71679,11928,11946,114584,11973	477	712	13588	0.7601700704308294	1.0	0.9999980301209368	100.0
GOTERM_BP_FAT	GO:0006812~cation transport	10	1.74825e+16	0.9945072000655509	94280,11950,14057,11947,432676,11949,71679,11928,11946,11973	477	515	13588	0.5531334595265719	1.0	0.9999999990450984	100.0
Annotation Cluster 34	Enrichment Score: 2.2902083705651335
Category	Term	Count	%	PValue	Genes	List Total	Pop Hits	Pop Total	Fold Enrichment	Bonferroni	Benjamini	FDR
GOTERM_BP_FAT	GO:0046394~carboxylic acid biosynthetic process	17	2.97203e+15	3.42363e+11	27053,19082,13244,232087,108156,107476,14104,105787,236539,69051,13361,56351,21991,56454,14873,107272,11898	477	141	13588	3.43453e+16	0.05770345203002958	0.0012912362271599864	0.0578741961358431
GOTERM_BP_FAT	GO:0016053~organic acid biosynthetic process	17	2.97203e+15	3.42363e+11	27053,19082,13244,232087,108156,107476,14104,105787,236539,69051,13361,56351,21991,56454,14873,107272,11898	477	141	13588	3.43453e+16	0.05770345203002958	0.0012912362271599864	0.0578741961358431
SP_PIR_KEYWORDS	Fatty acid biosynthesis	7	1.22378e+16	0.002710281875782983	19082,13244,56351,21991,107476,14104,105787	550	46	17854	4.93984e+15	0.638587568159473	0.016281095350473507	368044476479531
SP_PIR_KEYWORDS	lipid synthesis	10	1.74825e+16	0.003428465919261452	19082,15490,13244,104112,56348,56351,21991,107476,14104,105787	550	99	17854	3.27897e+15	0.7241460489345556	0.019922063133137158	463442558324354
GOTERM_BP_FAT	GO:0006633~fatty acid biosynthetic process	7	1.22378e+16	0.06438953814146939	19082,13244,56351,21991,107476,14104,105787	477	81	13588	246178533530036	1.0	0.5467805951012756	6.75475e+15
GOTERM_BP_FAT	GO:0006631~fatty acid metabolic process	10	1.74825e+16	0.19744374220999075	19082,50790,97212,13244,56351,21991,74205,107476,14104,105787	477	184	13588	1.54817e+16	1.0	0.88576980334968	975746079929317
GOTERM_BP_FAT	GO:0008610~lipid biosynthetic process	10	1.74825e+16	0.6717297589365239	19082,15490,13244,104112,56348,56351,21991,107476,14104,105787	477	285	13588	0.9995218654602965	1.0	0.999161064441728	1e+16
Annotation Cluster 35	Enrichment Score: 2.200790741292249
Category	Term	Count	%	PValue	Genes	List Total	Pop Hits	Pop Total	Fold Enrichment	Bonferroni	Benjamini	FDR
GOTERM_BP_FAT	GO:0015931~nucleobase, nucleoside, nucleotide and nucleic acid transport	10	1.74825e+16	0.0010777815762675353	72416,11739,53817,18148,15382,75786,71805,69482,227699,19386	477	74	13588	3.84951e+16	0.8461900949210857	0.02230221749880934	1.80687e+16
GOTERM_BP_FAT	GO:0051236~establishment of RNA localization	9	1.57343e+16	0.002064185733237553	72416,53817,18148,15382,75786,71805,69482,227699,19386	477	66	13588	3.88451e+15	0.9723223474665932	0.038240195567080026	3.43359e+15
GOTERM_BP_FAT	GO:0050658~RNA transport	9	1.57343e+16	0.002064185733237553	72416,53817,18148,15382,75786,71805,69482,227699,19386	477	66	13588	3.88451e+15	0.9723223474665932	0.038240195567080026	3.43359e+15
GOTERM_BP_FAT	GO:0050657~nucleic acid transport	9	1.57343e+16	0.002064185733237553	72416,53817,18148,15382,75786,71805,69482,227699,19386	477	66	13588	3.88451e+15	0.9723223474665932	0.038240195567080026	3.43359e+15
GOTERM_BP_FAT	GO:0006403~RNA localization	9	1.57343e+16	0.0022739187419034256	72416,53817,18148,15382,75786,71805,69482,227699,19386	477	67	13588	3.82653e+16	0.9807841135844022	0.040746775787294354	3.77619e+15
SP_PIR_KEYWORDS	mRNA transport	7	1.22378e+16	0.010108367450991793	72416,53817,15382,71805,69482,227699,19386	550	60	17854	3.78721e+15	0.9778501923994144	0.050852222715628836	1.3097e+16
GOTERM_BP_FAT	GO:0051028~mRNA transport	7	1.22378e+16	0.021040892682638923	72416,53817,15382,71805,69482,227699,19386	477	62	13588	3.2162e+15	0.9999999999999999	0.26110266040040697	3.02027e+16
SP_PIR_KEYWORDS	translocation	6	1.04895e+15	0.049398490170647624	53421,66525,71805,69482,227699,19386	550	65	17854	2.99648e+16	0.9999999943838668	0.20028626011816641	5.03402e+16
SP_PIR_KEYWORDS	nuclear pore complex	4	0.6993006993006993	0.06884500857632057	71805,69482,227699,19386	550	31	17854	4.18862e+15	0.9999999999975832	0.25958600942604004	626770098918453
Annotation Cluster 36	Enrichment Score: 2.1842833427794996
Category	Term	Count	%	PValue	Genes	List Total	Pop Hits	Pop Total	Fold Enrichment	Bonferroni	Benjamini	FDR
UP_SEQ_FEATURE	domain:MCM	5	0.8741258741258742	8.07818e+10	17217,17220,17216,17215,17219	542	8	16021	1.84744e+15	0.12160595477060254	0.005621530485042214	0.1352340888623349
GOTERM_BP_FAT	GO:0006270~DNA replication initiation	5	0.8741258741258742	2.63926e+11	17217,17220,17216,17215,17219	477	10	13588	1.42432e+16	0.36760171058246616	0.006619096322476592	0.4453350313583737
GOTERM_BP_FAT	GO:0006268~DNA unwinding during replication	5	0.8741258741258742	4.03292e+12	17217,17220,17216,17219,19291	477	11	13588	1.29484e+16	0.5035414674468337	0.009678625983652323	0.6797399308002938
GOTERM_BP_FAT	GO:0032508~DNA duplex unwinding	5	0.8741258741258742	5.88257e+11	17217,17220,17216,17219,19291	477	12	13588	1.18693e+16	0.6399510514545736	0.013709418759508818	0.9900399193700782
GOTERM_BP_FAT	GO:0032392~DNA geometric change	5	0.8741258741258742	8.26304e+11	17217,17220,17216,17219,19291	477	13	13588	1.09563e+16	0.7618982076445836	0.018001284283489682	1.38805e+16
GOTERM_BP_FAT	GO:0006261~DNA-dependent DNA replication	6	1.04895e+15	0.006208097748399569	17217,17220,17216,17215,17219,19291	477	34	13588	5.02701e+15	0.9999798206333234	0.09696065063945203	9.99451e+15
GOTERM_MF_FAT	GO:0003697~single-stranded DNA binding	6	1.04895e+15	0.006248345246767883	72416,17217,17220,17219,15382,19291	482	33	13288	5.01245e+15	0.9764406572392103	0.10736972771554631	883786388066612
SP_PIR_KEYWORDS	dna replication	7	1.22378e+16	0.04686914946593036	17217,17220,17216,245688,17215,17219,18538	550	85	17854	2.67333e+15	0.9999999847876061	0.19289335417410636	48483028607499
GOTERM_MF_FAT	GO:0043566~structure-specific DNA binding	7	1.22378e+16	0.0569168717121573	72416,17217,17220,12387,17219,15382,19291	482	76	13288	2.5392e+16	0.9999999999999994	0.4774058515573525	5.78988e+15
GOTERM_BP_FAT	GO:0006260~DNA replication	10	1.74825e+16	0.08646203388354551	18673,17217,17220,17216,245688,17215,19704,17219,19291,18538	477	152	13588	1.8741e+15	1.0	0.6391874084277818	7.83265e+15
GOTERM_MF_FAT	GO:0003678~DNA helicase activity	3	0.5244755244755245	0.22859046298109056	17217,17220,17219	482	25	13288	3.30822e+16	1.0	0.8841651242776962	9.78321e+15
GOTERM_BP_FAT	GO:0006259~DNA metabolic process	14	2.44755e+16	0.7190230268051782	26926,19291,18673,13194,71514,17220,17217,17216,17215,245688,19704,17219,18538,233789	477	421	13588	0.9472903190466943	1.0	0.9995963533318555	999999999523999
Annotation Cluster 37	Enrichment Score: 2.109172740976508
Category	Term	Count	%	PValue	Genes	List Total	Pop Hits	Pop Total	Fold Enrichment	Bonferroni	Benjamini	FDR
SP_PIR_KEYWORDS	er-golgi transport	14	2.44755e+16	7.8514e+08	70361,27054,11843,213827,68090,11844,12847,108124,56447,20333,20334,76983,56041,59042	550	79	17854	5.75273e+15	2.94384e+11	9.49762e+09	0.0010848230976301387
GOTERM_CC_FAT	GO:0030120~vesicle coat	7	1.22378e+16	3.28002e+11	27054,56447,20334,67300,12847,12757,59042	434	28	12504	7.20276e+15	0.1174937400729964	0.0024966660679781594	0.4533026127383377
GOTERM_CC_FAT	GO:0044433~cytoplasmic vesicle part	12	2.0979e+15	4.30497e+11	27054,56447,15944,20334,109711,216344,67300,12847,11674,12757,59042,12343	434	95	12504	3.63929e+15	0.15130427569042326	0.0030334370256510645	0.5945593990742237
GOTERM_CC_FAT	GO:0048475~coated membrane	9	1.57343e+16	8.12957e+11	27054,56447,11771,20334,213827,67300,12847,12757,59042	434	58	12504	4.47068e+15	0.2664523632066712	0.005421439070227629	1.12002e+16
GOTERM_CC_FAT	GO:0030117~membrane coat	9	1.57343e+16	8.12957e+11	27054,56447,11771,20334,213827,67300,12847,12757,59042	434	58	12504	4.47068e+15	0.2664523632066712	0.005421439070227629	1.12002e+16
GOTERM_CC_FAT	GO:0030659~cytoplasmic vesicle membrane	11	1.92308e+16	8.24782e+11	27054,56447,15944,20334,109711,216344,67300,12847,12757,59042,12343	434	87	12504	3.64278e+15	0.26975235746030823	0.0054055366368362945	1.13623e+16
GOTERM_CC_FAT	GO:0005798~Golgi-associated vesicle	7	1.22378e+16	0.0013419441339607562	68365,56447,16004,67300,12847,12757,59042	434	36	12504	5.60215e+15	0.4004788809330275	0.007962258157035773	1.84255e+16
GOTERM_CC_FAT	GO:0012506~vesicle membrane	11	1.92308e+16	0.0019089825506922685	27054,56447,15944,20334,109711,216344,67300,12847,12757,59042,12343	434	97	12504	3.26723e+16	0.5171346580940723	0.01034635383071525	2.61162e+16
GOTERM_CC_FAT	GO:0030133~transport vesicle	6	1.04895e+15	0.002905535262217207	68365,27054,20334,16004,67300,12757	434	29	12504	5.96091e+15	0.6699860272099539	0.014294515264506424	3.94969e+15
GOTERM_CC_FAT	GO:0030660~Golgi-associated vesicle membrane	5	0.8741258741258742	0.00531330796499621	56447,67300,12847,12757,59042	434	21	12504	6.85978e+15	0.8686339414449318	0.023874289341643262	7.11254e+15
GOTERM_BP_FAT	GO:0048193~Golgi vesicle transport	7	1.22378e+16	0.009318639535358008	70361,27054,56447,20333,20334,16562,59042	477	52	13588	3.8347e+15	0.9999999126204308	0.1385257658473571	1.46412e+16
GOTERM_CC_FAT	GO:0030662~coated vesicle membrane	7	1.22378e+16	0.00966139886555982	27054,56447,20334,67300,12847,12757,59042	434	53	12504	3.80523e+16	0.9752490178015915	0.03983212884559473	1.25807e+15
GOTERM_CC_FAT	GO:0044431~Golgi apparatus part	16	2.7972e+15	0.012622882693579838	27054,68365,15944,12847,12757,386649,56447,20333,20334,56041,192176,16004,108000,216344,67300,59042	434	227	12504	2.03074e+16	0.9920923917549261	0.05071124823181017	1.61323e+15
GOTERM_CC_FAT	GO:0030658~transport vesicle membrane	4	0.6993006993006993	0.01650417471256078	27054,20334,67300,12757	434	16	12504	7.20276e+15	0.998236682908773	0.06391358656231516	2.05846e+16
GOTERM_CC_FAT	GO:0000139~Golgi membrane	11	1.92308e+16	0.020683710631571695	27054,56447,15944,20333,20334,56041,216344,67300,12847,12757,59042	434	137	12504	2.3133e+16	0.999651939486434	0.07804279459688157	251330627132201
GOTERM_BP_FAT	GO:0016192~vesicle-mediated transport	26	4.54545e+15	0.022644256911046736	13169,16562,108124,11771,16971,20910,192176,59042,70361,27054,11843,12387,213827,68090,353172,11844,12847,30930,12757,19353,56447,20333,20334,56041,76983,67300	477	466	13588	1.58937e+15	1.0	0.27246905399346744	3.21107e+16
GOTERM_CC_FAT	GO:0030140~trans-Golgi network transport vesicle	4	0.6993006993006993	0.022853006901733024	68365,16004,67300,12757	434	18	12504	6.40246e+16	0.9998504722226846	0.0843126410972791	2.73974e+16
GOTERM_CC_FAT	GO:0030663~COPI coated vesicle membrane	3	0.5244755244755245	0.04478886515295202	56447,12847,59042	434	10	12504	8.64332e+15	0.9999999738264643	0.1518544262706466	4.69859e+15
GOTERM_CC_FAT	GO:0030126~COPI vesicle coat	3	0.5244755244755245	0.04478886515295202	56447,12847,59042	434	10	12504	8.64332e+15	0.9999999738264643	0.1518544262706466	4.69859e+15
GOTERM_CC_FAT	GO:0030137~COPI-coated vesicle	3	0.5244755244755245	0.06277910369257611	56447,12847,59042	434	12	12504	7.20276e+15	0.9999999999813023	0.20278394541231126	5.92589e+15
GOTERM_CC_FAT	GO:0030135~coated vesicle	9	1.57343e+16	0.06614918616599738	68365,27054,56447,20334,16004,67300,12847,12757,59042	434	124	12504	2.09113e+15	0.9999999999952606	0.21104528907951603	6.12416e+15
SP_PIR_KEYWORDS	cytoplasmic vesicle	12	2.0979e+15	0.10314135773481367	13722,56447,13885,226101,15944,213827,216344,67300,12847,12757,59042,29876	550	232	17854	1.67906e+16	1.0	0.35834895996364946	7.77778e+15
GOTERM_CC_FAT	GO:0005794~Golgi apparatus	30	5.24476e+15	0.14730184102529764	15944,16562,14569,108124,11771,192176,216344,59042,70361,68365,27054,11843,213827,68090,11844,12847,12757,19070,386649,56447,13722,20333,20334,56041,76983,26395,60440,16004,108000,67300	434	682	12504	1.26735e+16	1.0	0.39705852661110386	8.89956e+15
SP_PIR_KEYWORDS	golgi apparatus	19	3.32168e+16	0.43644002659783476	70361,27054,15944,11843,213827,68090,11844,12847,19070,386649,13722,56447,20333,20334,76983,56041,60440,216344,59042	550	553	17854	1.11532e+16	1.0	0.8433791450306246	9.99638e+15
GOTERM_CC_FAT	GO:0030136~clathrin-coated vesicle	4	0.6993006993006993	0.7036638606267415	68365,16004,67300,12757	434	104	12504	110811768876285	1.0	0.9590674736846478	1e+16
Annotation Cluster 38	Enrichment Score: 2.0924018561464224
Category	Term	Count	%	PValue	Genes	List Total	Pop Hits	Pop Total	Fold Enrichment	Bonferroni	Benjamini	FDR
UP_SEQ_FEATURE	repeat:WD 5	17	2.97203e+15	0.0014068746271186463	14688,216961,12237,12847,22388,11867,71978,27979,245688,18786,98193,54709,14694,14693,70465,13427,23789	542	202	16021	2.48764e+15	0.8956102358713867	0.060838030996154924	2.33077e+15
UP_SEQ_FEATURE	repeat:WD 4	17	2.97203e+15	0.0030243084782699686	14688,216961,12237,12847,22388,11867,71978,27979,245688,18786,98193,54709,14694,14693,70465,13427,23789	542	218	16021	2.30506e+15	0.9922601266903976	0.11443927673492171	4.94723e+15
UP_SEQ_FEATURE	repeat:WD 3	17	2.97203e+15	0.005318137473376692	14688,216961,12237,12847,22388,11867,71978,27979,245688,18786,98193,54709,14694,14693,70465,13427,23789	542	231	16021	2.17534e+15	0.999808071607692	0.17676108521679867	85450383318312
UP_SEQ_FEATURE	repeat:WD 1	17	2.97203e+15	0.006218416120247462	14688,216961,12237,12847,22388,11867,71978,27979,245688,18786,98193,54709,14694,14693,70465,13427,23789	542	235	16021	2.13831e+16	0.9999551289955309	0.19947109533508522	9.92179e+15
UP_SEQ_FEATURE	repeat:WD 2	17	2.97203e+15	0.006218416120247462	14688,216961,12237,12847,22388,11867,71978,27979,245688,18786,98193,54709,14694,14693,70465,13427,23789	542	235	16021	2.13831e+16	0.9999551289955309	0.19947109533508522	9.92179e+15
SP_PIR_KEYWORDS	wd repeat	17	2.97203e+15	0.00755926437051716	14688,216961,12237,12847,22388,11867,71978,27979,245688,18786,98193,54709,14694,14693,70465,13427,23789	550	263	17854	2.09829e+16	0.9418943663962053	0.039834770323968205	9.95343e+15
UP_SEQ_FEATURE	repeat:WD 6	11	1.92308e+16	0.046663309967566256	14688,245688,18786,98193,14694,14693,13427,12847,22388,11867,71978	542	161	16021	2.01956e+16	1.0	0.6871703318867579	5.50895e+15
UP_SEQ_FEATURE	repeat:WD 7	9	1.57343e+16	0.05906489964227889	14688,245688,18786,98193,14694,14693,13427,22388,71978	542	124	16021	2.14541e+16	1.0	0.757353001314748	6.39347e+15
Annotation Cluster 39	Enrichment Score: 2.085458910205717
Category	Term	Count	%	PValue	Genes	List Total	Pop Hits	Pop Total	Fold Enrichment	Bonferroni	Benjamini	FDR
UP_SEQ_FEATURE	short sequence motif:Prevents secretion from ER	11	1.92308e+16	2.51284e+11	12321,19672,22027,12304,67511,12406,52377,14828,14827,320011,71853	542	59	16021	5.51101e+15	0.039529170754686205	0.0028766877827580695	0.04208514266764718
GOTERM_CC_FAT	GO:0005788~endoplasmic reticulum lumen	12	2.0979e+15	3.40049e+10	12321,18451,19672,22027,12304,12406,52377,14828,14827,320011,21355,71853	434	72	12504	4.80184e+16	0.012872505646146282	3.23849e+12	0.04708389865692997
SP_PIR_KEYWORDS	endoplasmic reticulum	40	6.99301e+15	1.38877e+12	19285,72736,50790,22027,103963,56348,320011,12321,19672,67437,12304,12406,107513,66624,21354,216344,21356,21355,18451,70361,27054,53421,13244,14828,14827,68090,18984,13722,67511,20333,52377,20334,20014,26433,80898,76983,60440,74205,71853,56086	550	678	17854	1.91515e+15	0.05074945499485617	0.001182993023396306	0.19171581151712358
GOTERM_CC_FAT	GO:0044432~endoplasmic reticulum part	19	3.32168e+16	0.0011392120355688965	18451,22027,27054,103963,14828,14827,320011,12321,19672,67437,12304,20333,12406,20014,52377,66624,21354,71853,21355	434	231	12504	2.36974e+15	0.35227380153313415	0.00721198798179723	1.56623e+16
GOTERM_CC_FAT	GO:0005783~endoplasmic reticulum	47	8.21678e+15	0.0012587168444465858	19285,72736,22027,50790,15944,103963,56348,320011,108124,12321,19672,67437,12304,12406,107513,66624,216197,21354,216344,21356,269523,21355,15953,70361,18451,27054,68365,53421,13244,14828,14827,68090,18984,13722,15490,67511,20333,52377,20334,20014,26433,80898,76983,60440,74205,71853,56086	434	838	12504	1.61589e+16	0.38113813738072366	0.0075880987213633455	1.7292e+16
UP_SEQ_FEATURE	glycosylation site:N-linked (GlcNAc...)	22	3.84615e+16	1.0	18451,22027,103963,320011,11287,12321,12304,21825,15490,67511,16971,12406,107513,20014,52377,80898,26433,12558,16004,12555,21356,12552	542	3444	16021	0.18882081677959636	1.0	1.0	100.0
SP_PIR_KEYWORDS	signal	29	506993006993007	1.0	72736,11657,22027,103963,320011,12321,19672,12304,16971,12406,107513,11949,21356,230598,18451,70361,14828,14827,11287,21825,67511,20014,52377,26433,12558,16004,12555,71853,12552	550	2970	17854	0.3169672482399755	1.0	1.0	100.0
SP_PIR_KEYWORDS	glycoprotein	25	4.37063e+15	1.0	20742,22027,103963,320011,12321,19672,12304,107513,12406,16971,21356,18451,18477,11287,21825,67511,15490,20014,52377,80898,26433,12558,16004,12555,12552	550	3600	17854	0.22542929292929292	1.0	1.0	100.0
UP_SEQ_FEATURE	signal peptide	29	506993006993007	1.0	72736,11657,22027,103963,320011,12321,19672,12304,16971,12406,107513,11949,21356,230598,18451,70361,14828,14827,11287,21825,67511,20014,52377,26433,12558,16004,12555,71853,12552	542	2963	16021	0.28930549345992956	1.0	1.0	100.0
Annotation Cluster 40	Enrichment Score: 1.9002303449150841
Category	Term	Count	%	PValue	Genes	List Total	Pop Hits	Pop Total	Fold Enrichment	Bonferroni	Benjamini	FDR
UP_SEQ_FEATURE	repeat:Spectrin 4	5	0.8741258741258742	9.82486e+11	20740,20742,11426,109711,60595	542	14	16021	1.05568e+16	0.7935432636548891	0.046683205156614394	1.63312e+16
UP_SEQ_FEATURE	repeat:Spectrin 3	5	0.8741258741258742	0.0016929049631821485	20740,20742,11426,109711,60595	542	16	16021	9.2372e+15	0.9340866956881713	0.07086171898786475	2.79834e+15
UP_SEQ_FEATURE	repeat:Spectrin 2	5	0.8741258741258742	0.0026977889783623716	20740,20742,11426,109711,60595	542	18	16021	8.21084e+15	0.986908635748393	0.10521733505194142	4.4244e+15
UP_SEQ_FEATURE	repeat:Spectrin 1	5	0.8741258741258742	0.0026977889783623716	20740,20742,11426,109711,60595	542	18	16021	8.21084e+15	0.986908635748393	0.10521733505194142	4.4244e+15
UP_SEQ_FEATURE	repeat:Spectrin 17	3	0.5244755244755245	0.021353854570459	20740,20742,11426	542	7	16021	126681602530311	0.9999999999999991	0.4798631894767361	3.03425e+15
UP_SEQ_FEATURE	repeat:Spectrin 8	3	0.5244755244755245	0.021353854570459	20740,20742,11426	542	7	16021	126681602530311	0.9999999999999991	0.4798631894767361	3.03425e+15
UP_SEQ_FEATURE	repeat:Spectrin 7	3	0.5244755244755245	0.021353854570459	20740,20742,11426	542	7	16021	126681602530311	0.9999999999999991	0.4798631894767361	3.03425e+15
UP_SEQ_FEATURE	repeat:Spectrin 12	3	0.5244755244755245	0.021353854570459	20740,20742,11426	542	7	16021	126681602530311	0.9999999999999991	0.4798631894767361	3.03425e+15
UP_SEQ_FEATURE	repeat:Spectrin 11	3	0.5244755244755245	0.021353854570459	20740,20742,11426	542	7	16021	126681602530311	0.9999999999999991	0.4798631894767361	3.03425e+15
UP_SEQ_FEATURE	repeat:Spectrin 10	3	0.5244755244755245	0.021353854570459	20740,20742,11426	542	7	16021	126681602530311	0.9999999999999991	0.4798631894767361	3.03425e+15
UP_SEQ_FEATURE	repeat:Spectrin 16	3	0.5244755244755245	0.021353854570459	20740,20742,11426	542	7	16021	126681602530311	0.9999999999999991	0.4798631894767361	3.03425e+15
UP_SEQ_FEATURE	repeat:Spectrin 15	3	0.5244755244755245	0.021353854570459	20740,20742,11426	542	7	16021	126681602530311	0.9999999999999991	0.4798631894767361	3.03425e+15
UP_SEQ_FEATURE	repeat:Spectrin 14	3	0.5244755244755245	0.021353854570459	20740,20742,11426	542	7	16021	126681602530311	0.9999999999999991	0.4798631894767361	3.03425e+15
UP_SEQ_FEATURE	repeat:Spectrin 13	3	0.5244755244755245	0.021353854570459	20740,20742,11426	542	7	16021	126681602530311	0.9999999999999991	0.4798631894767361	3.03425e+15
UP_SEQ_FEATURE	repeat:Spectrin 9	3	0.5244755244755245	0.021353854570459	20740,20742,11426	542	7	16021	126681602530311	0.9999999999999991	0.4798631894767361	3.03425e+15
UP_SEQ_FEATURE	repeat:Spectrin 6	3	0.5244755244755245	0.027842231919557953	20740,20742,11426	542	8	16021	1.10846e+16	1.0	0.5484636487469816	3.76876e+15
UP_SEQ_FEATURE	repeat:Spectrin 5	3	0.5244755244755245	0.03500792058803558	20740,20742,11426	542	9	16021	98530135301353	1.0	0.6145125197644365	4.49506e+15
Annotation Cluster 41	Enrichment Score: 1.800471325033821
Category	Term	Count	%	PValue	Genes	List Total	Pop Hits	Pop Total	Fold Enrichment	Bonferroni	Benjamini	FDR
GOTERM_MF_FAT	GO:0016887~ATPase activity	23	4.02098e+15	5.858e+10	53817,13207,17886,13205,13204,13211,68278,100019,27407,19704,24015,320632,15481,432676,11947,21354,11949,13681,21355,11928,11946,11973,13424	482	281	13288	2.25649e+15	0.29560157832310585	0.014494394364834684	0.8613098856819601
GOTERM_MF_FAT	GO:0042623~ATPase activity, coupled	19	3.32168e+16	0.0012792622851270498	53817,13207,17886,13205,13204,13211,68278,19704,320632,15481,432676,11947,21354,11949,13681,21355,11928,11946,11973	482	223	13288	2.34888e+15	0.5348933669527214	0.030155513226888808	1.87198e+16
GOTERM_MF_FAT	GO:0004386~helicase activity	12	2.0979e+15	0.0071350748066886386	68278,17217,17220,19704,53817,17219,320632,13207,13205,13204,13681,13211	482	129	13288	2.56451e+15	0.9861859544191744	0.11214458701674623	1.00314e+16
GOTERM_MF_FAT	GO:0070035~purine NTP-dependent helicase activity	9	1.57343e+16	0.01250863283061231	68278,19704,53817,320632,13207,13205,13204,13681,13211	482	86	13288	2.88507e+15	0.9994618318835508	0.1797022404417159	1.6958e+15
GOTERM_MF_FAT	GO:0008026~ATP-dependent helicase activity	9	1.57343e+16	0.01250863283061231	68278,19704,53817,320632,13207,13205,13204,13681,13211	482	86	13288	2.88507e+15	0.9994618318835508	0.1797022404417159	1.6958e+15
UP_SEQ_FEATURE	short sequence motif:Q motif	5	0.8741258741258742	0.02423963187979622	68278,53817,13207,13205,13681	542	33	16021	4.47864e+16	1.0	0.5113313701429911	337044929490859
SP_PIR_KEYWORDS	helicase	9	1.57343e+16	0.03191794509257739	68278,19704,53817,320632,13207,13205,13204,13681,13211	550	120	17854	2.43464e+15	0.9999947872887126	0.1427107296003407	3.61224e+16
UP_SEQ_FEATURE	domain:Helicase C-terminal	7	1.22378e+16	0.07062478803418107	68278,53817,13207,13205,13204,13681,13211	542	86	16021	2.40597e+16	1.0	0.795783690829168	7.06804e+15
UP_SEQ_FEATURE	domain:Helicase ATP-binding	7	1.22378e+16	0.08041918165400036	68278,53817,13207,13205,13204,13681,13211	542	89	16021	2.32487e+15	1.0	0.8257943332255316	7.54482e+15
UP_SEQ_FEATURE	short sequence motif:DEAD box	3	0.5244755244755245	0.2690801708013626	13207,13205,13681	542	30	16021	2.9559e+16	1.0	0.9934670491292139	9.94756e+15
Annotation Cluster 42	Enrichment Score: 1.7571117419597788
Category	Term	Count	%	PValue	Genes	List Total	Pop Hits	Pop Total	Fold Enrichment	Bonferroni	Benjamini	FDR
GOTERM_CC_FAT	GO:0005853~eukaryotic translation elongation factor 1 complex	3	0.5244755244755245	0.006853199605847445	66656,55949,67160	434	4	12504	2.16083e+16	0.9272013033602898	0.02966664377503303	9.08438e+15
SP_PIR_KEYWORDS	elongation factor	5	0.8741258741258742	0.008848227024977753	13627,13629,66656,55949,67160	550	27	17854	6.01145e+15	0.9643088275323249	0.04585685910639703	1.1556e+16
GOTERM_MF_FAT	GO:0003746~translation elongation factor activity	5	0.8741258741258742	0.02461185583058827	13627,13629,66656,55949,67160	482	31	13288	4.44653e+15	0.9999996626128627	0.298693568150014	3.07799e+16
GOTERM_BP_FAT	GO:0006414~translational elongation	5	0.8741258741258742	0.0627565457904766	11837,13627,66656,55949,67160	477	43	13588	3.31237e+16	1.0	0.5422111225187148	6.65763e+15
Annotation Cluster 43	Enrichment Score: 1.7548974653693277
Category	Term	Count	%	PValue	Genes	List Total	Pop Hits	Pop Total	Fold Enrichment	Bonferroni	Benjamini	FDR
UP_SEQ_FEATURE	domain:KH 3	4	0.6993006993006993	0.006707776800711363	15387,110611,23983,18521	542	12	16021	98530135301353	0.9999796463836118	0.20533540618510038	1.06619e+16
UP_SEQ_FEATURE	domain:KH 1	4	0.6993006993006993	0.02846849446192047	15387,110611,23983,18521	542	20	16021	5.91181e+15	1.0	0.5503217975793551	3.83566e+16
UP_SEQ_FEATURE	domain:KH 2	4	0.6993006993006993	0.02846849446192047	15387,110611,23983,18521	542	20	16021	5.91181e+15	1.0	0.5503217975793551	3.83566e+16
Annotation Cluster 44	Enrichment Score: 1.6799583732826513
Category	Term	Count	%	PValue	Genes	List Total	Pop Hits	Pop Total	Fold Enrichment	Bonferroni	Benjamini	FDR
GOTERM_CC_FAT	GO:0005913~cell-cell adherens junction	6	1.04895e+15	0.003927994851270634	20740,22793,12387,17886,12385,22330	434	31	12504	5.57633e+15	0.7767611511957238	0.018342202386293138	5.3048e+15
GOTERM_CC_FAT	GO:0014704~intercalated disc	4	0.6993006993006993	0.005528884043227061	20740,12387,22330,12345	434	11	12504	1.04767e+16	0.8790465701311659	0.024544924487290176	7.39095e+15
GOTERM_CC_FAT	GO:0005916~fascia adherens	3	0.5244755244755245	0.022383816354113455	20740,12387,22330	434	7	12504	1.23476e+16	0.9998204631189858	0.0834352127075958	2.69131e+16
GOTERM_CC_FAT	GO:0005911~cell-cell junction	8	1.3986e+16	0.3921245030985423	20740,22793,12387,17886,12385,66395,22330,12345	434	173	12504	1.3323e+15	1.0	0.759728598233002	9.98986e+15
Annotation Cluster 45	Enrichment Score: 1.675396537399092
Category	Term	Count	%	PValue	Genes	List Total	Pop Hits	Pop Total	Fold Enrichment	Bonferroni	Benjamini	FDR
SP_PIR_KEYWORDS	one-carbon metabolism	5	0.8741258741258742	9.21169e+11	269378,108037,13361,232087,108156	550	15	17854	1.08206e+15	0.29220280214643957	0.00662407250247754	1.26529e+16
GOTERM_BP_FAT	GO:0000096~sulfur amino acid metabolic process	4	0.6993006993006993	0.04498480872093942	269378,232087,108156,14630	477	23	13588	4.95415e+15	1.0	0.4419159570826462	5.40807e+15
GOTERM_BP_FAT	GO:0006730~one-carbon metabolic process	7	1.22378e+16	0.22719830011229164	269378,108037,13361,27374,232087,108156,15469	477	117	13588	1.70431e+16	1.0	0.9144260501240682	9.87196e+15
Annotation Cluster 46	Enrichment Score: 1.6071758112901104
Category	Term	Count	%	PValue	Genes	List Total	Pop Hits	Pop Total	Fold Enrichment	Bonferroni	Benjamini	FDR
GOTERM_CC_FAT	GO:0000267~cell fraction	36	6.29371e+15	0.0015513748504254001	19285,26926,50790,11461,18641,20430,29876,268795,16905,16971,66624,21356,269523,12306,14681,11928,76071,19944,109624,68365,17999,12387,13346,14630,18984,12847,22335,12343,19353,15452,56041,16004,98732,74205,16785,114584	434	596	12504	1.74027e+16	0.44652172691207104	0.008922573362375563	2.12725e+16
GOTERM_CC_FAT	GO:0005626~insoluble fraction	30	5.24476e+15	0.009531372260393547	19285,26926,50790,20430,268795,16905,16971,66624,21356,12306,14681,269523,11928,76071,19944,109624,68365,17999,12387,13346,18984,12847,22335,12343,19353,56041,16004,74205,16785,114584	434	528	12504	1.63699e+16	0.9739794835185602	0.03973212743279542	1.24216e+15
GOTERM_CC_FAT	GO:0005624~membrane fraction	28	4.8951e+15	0.018882672907996154	19285,50790,26926,20430,268795,16971,66624,21356,12306,14681,269523,11928,76071,19944,109624,68365,17999,12387,18984,12847,22335,12343,19353,56041,16004,74205,16785,114584	434	510	12504	1.58178e+16	0.9992990608784058	0.0721425904873021	2.32035e+15
GOTERM_CC_FAT	GO:0005792~microsome	12	2.0979e+15	0.04248544713582697	19285,26926,50790,56041,66624,74205,18984,12847,21356,269523,22335,11928	434	176	12504	1.96439e+15	0.9999999344774099	0.14575061121705435	4.51877e+16
GOTERM_CC_FAT	GO:0042598~vesicular fraction	12	2.0979e+15	0.051852636404438227	19285,26926,50790,56041,66624,74205,18984,12847,21356,269523,22335,11928	434	182	12504	1.89963e+16	0.9999999984522682	0.17270441301611572	5.21648e+16
SP_PIR_KEYWORDS	microsome	5	0.8741258741258742	0.36982685775388346	19285,50790,66624,74205,21356	550	100	17854	1.62309e+15	1.0	0.7869170316814218	9.98305e+15
Annotation Cluster 47	Enrichment Score: 1.60623430051966
Category	Term	Count	%	PValue	Genes	List Total	Pop Hits	Pop Total	Fold Enrichment	Bonferroni	Benjamini	FDR
UP_SEQ_FEATURE	repeat:1-2	5	0.8741258741258742	0.006831863322900965	59013,15387,67115,56403,22201	542	23	16021	6.42588e+15	0.9999833444702607	0.20484986982655173	1.08487e+16
UP_SEQ_FEATURE	repeat:2-1	4	0.6993006993006993	0.036602432203780476	59013,15387,67115,56403	542	22	16021	5.37437e+15	1.0	0.6251133198184837	4.64547e+15
UP_SEQ_FEATURE	repeat:2-2	4	0.6993006993006993	0.036602432203780476	59013,15387,67115,56403	542	22	16021	5.37437e+15	1.0	0.6251133198184837	4.64547e+15
UP_SEQ_FEATURE	repeat:1-1	4	0.6993006993006993	0.04106801753593924	59013,15387,56403,22201	542	23	16021	5.1407e+16	1.0	0.6622937427604745	5.04639e+15
Annotation Cluster 48	Enrichment Score: 1.585944125756692
Category	Term	Count	%	PValue	Genes	List Total	Pop Hits	Pop Total	Fold Enrichment	Bonferroni	Benjamini	FDR
SP_PIR_KEYWORDS	Redox-active center	7	1.22378e+16	0.001131538787355323	72736,12304,53382,21672,18477,14827,71853	550	39	17854	5.82648e+15	0.34594726601246084	0.007978703549322619	1.55216e+16
GOTERM_BP_FAT	GO:0045454~cell redox homeostasis	8	1.3986e+16	0.005769932521784421	72736,26926,12304,53382,21672,18477,14827,71853	477	62	13588	3.67566e+15	0.9999566243381212	0.09123840943645156	9.32114e+15
UP_SEQ_FEATURE	domain:Thioredoxin 2	3	0.5244755244755245	0.027842231919557953	12304,14827,71853	542	8	16021	1.10846e+16	1.0	0.5484636487469816	3.76876e+15
UP_SEQ_FEATURE	domain:Thioredoxin 1	3	0.5244755244755245	0.027842231919557953	12304,14827,71853	542	8	16021	1.10846e+16	1.0	0.5484636487469816	3.76876e+15
GOTERM_MF_FAT	GO:0003756~protein disulfide isomerase activity	3	0.5244755244755245	0.031677473944907664	12304,14827,71853	482	8	13288	1.03382e+15	0.9999999956350336	0.35434641633278985	37824278304851
GOTERM_MF_FAT	GO:0016864~intramolecular oxidoreductase activity, transposing S-S bonds	3	0.5244755244755245	0.031677473944907664	12304,14827,71853	482	8	13288	1.03382e+15	0.9999999956350336	0.35434641633278985	37824278304851
GOTERM_MF_FAT	GO:0016862~intramolecular oxidoreductase activity, interconverting keto- and enol-groups	3	0.5244755244755245	0.039767244301270425	12304,14827,71853	482	9	13288	9.18949e+15	0.9999999999710828	0.4032817823859285	4.5067e+15
GOTERM_MF_FAT	GO:0016860~intramolecular oxidoreductase activity	5	0.8741258741258742	0.04746095038738616	12304,56351,21991,14827,71853	482	38	13288	362742956977506	0.9999999999997645	0.434555028293826	5.12183e+15
UP_SEQ_FEATURE	domain:Thioredoxin	4	0.6993006993006993	0.09233907055408816	72736,53382,21672,18477	542	32	16021	3.69488e+15	1.0	0.8533558480646581	8.02683e+15
SP_PIR_KEYWORDS	Isomerase	7	1.22378e+16	0.1561571801142749	14583,12304,56351,21991,14827,19386,71853	550	118	17854	1.9257e+16	1.0	0.4920386261636449	9.04246e+15
Annotation Cluster 49	Enrichment Score: 1.5560622406411175
Category	Term	Count	%	PValue	Genes	List Total	Pop Hits	Pop Total	Fold Enrichment	Bonferroni	Benjamini	FDR
SP_PIR_KEYWORDS	magnesium	22	3.84615e+16	0.013375632210223296	18746,11544,50790,14208,232087,67834,18641,269951,11566,15926,16434,67895,105787,20020,104112,15452,76952,100044223,19139,74205,11928,53893	550	403	17854	1.77211e+16	0.993588803733451	0.0659630833580579	1.69775e+16
UP_SEQ_FEATURE	metal ion-binding site:Magnesium	9	1.57343e+16	0.023256472024847076	18746,104112,232087,76952,19139,100044223,11566,11928,16434	542	103	16021	2.58283e+15	1.0	0.5031160087171993	3.25766e+16
GOTERM_MF_FAT	GO:0000287~magnesium ion binding	22	3.84615e+16	0.06901684878351769	18746,11544,50790,14208,232087,67834,18641,269951,11566,15926,16434,67895,105787,20020,104112,15452,76952,100044223,19139,74205,11928,53893	482	409	13288	1.4829e+16	1.0	0.5216128918945533	6.5206e+15
Annotation Cluster 50	Enrichment Score: 1.5323348008439353
Category	Term	Count	%	PValue	Genes	List Total	Pop Hits	Pop Total	Fold Enrichment	Bonferroni	Benjamini	FDR
GOTERM_BP_FAT	GO:0030163~protein catabolic process	34	5.94406e+15	0.0022136744379596188	22027,22225,217342,17886,59026,15185,26443,19386,67088,73677,22201,19167,67089,26446,19182,19181,269523,19184,117146,231915,74996,17999,23996,22186,70790,22284,13194,107260,19053,69116,19179,80898,22230,71902	477	556	13588	1.74197e+16	0.9786605673506066	0.04010141899792907	3.6779e+16
GOTERM_BP_FAT	GO:0009057~macromolecule catabolic process	37	6.46853e+15	0.004870102998162619	26926,22027,217342,22225,17886,59026,15185,26443,19386,67088,73677,22201,19167,67089,19704,26446,19182,19181,269523,19184,117146,231915,74996,17999,23996,22186,70790,22284,13194,107260,19053,69116,19179,80898,22230,233789,71902	477	654	13588	1.61161e+15	0.9997914127274435	0.07973143733404808	7.92341e+15
GOTERM_BP_FAT	GO:0006511~ubiquitin-dependent protein catabolic process	12	2.0979e+15	0.01073187996502829	231915,22027,19053,74996,22225,19167,22230,26443,15185,73677,22284,19184	477	141	13588	2.42437e+16	0.9999999926695948	0.15400613409455832	1.6677e+16
GOTERM_BP_FAT	GO:0051603~proteolysis involved in cellular protein catabolic process	29	506993006993007	0.02219904091714199	22027,22225,217342,17886,59026,19386,26443,15185,67088,73677,22201,19167,26446,269523,19184,117146,231915,74996,17999,22186,70790,22284,13194,107260,19053,69116,80898,22230,71902	477	534	13588	1.54701e+16	1.0	0.2696913834069763	3.15859e+16
GOTERM_BP_FAT	GO:0044257~cellular protein catabolic process	29	506993006993007	0.022920365376411046	22027,22225,217342,17886,59026,19386,26443,15185,67088,73677,22201,19167,26446,269523,19184,117146,231915,74996,17999,22186,70790,22284,13194,107260,19053,69116,80898,22230,71902	477	537	13588	1.53837e+16	1.0	0.2716339281302381	3.24343e+15
GOTERM_BP_FAT	GO:0044265~cellular macromolecule catabolic process	32	5.59441e+15	0.023863663386465797	26926,22027,22225,217342,17886,59026,15185,26443,19386,67088,73677,22201,19704,19167,26446,269523,19184,117146,231915,74996,17999,22186,70790,22284,13194,107260,19053,69116,80898,22230,233789,71902	477	609	13588	1.49682e+16	1.0	0.2793309347249333	3.35288e+16
GOTERM_BP_FAT	GO:0019941~modification-dependent protein catabolic process	26	4.54545e+15	0.05424838338582984	22027,22225,217342,59026,26443,15185,19386,67088,73677,22201,19167,269523,19184,117146,231915,74996,17999,22186,70790,22284,13194,107260,19053,69116,22230,71902	477	508	13588	1.45796e+16	1.0	0.4943308900773855	6.10582e+15
GOTERM_BP_FAT	GO:0043632~modification-dependent macromolecule catabolic process	26	4.54545e+15	0.05424838338582984	22027,22225,217342,59026,26443,15185,19386,67088,73677,22201,19167,269523,19184,117146,231915,74996,17999,22186,70790,22284,13194,107260,19053,69116,22230,71902	477	508	13588	1.45796e+16	1.0	0.4943308900773855	6.10582e+15
SP_PIR_KEYWORDS	ubl conjugation pathway	19	3.32168e+16	0.24385052190390277	22225,217342,17999,74996,59026,22186,19386,67088,70790,22284,22201,13194,107260,69116,98193,22230,269523,117146,71902	550	484	17854	1.27433e+16	1.0	0.638558858458831	9.78976e+15
GOTERM_BP_FAT	GO:0006508~proteolysis	38	6.64336e+15	0.4711228140862812	22027,22225,217342,17886,59026,75221,15185,26443,19386,67088,73677,12333,12334,22201,22273,19167,26446,66624,67003,230598,269523,19184,117146,231915,74996,17999,22186,70790,22019,22284,13194,107260,19072,19053,69116,80898,22230,71902	477	1034	13588	1.04689e+16	1.0	0.9913140882892234	9.99979e+15
Annotation Cluster 51	Enrichment Score: 1.4845296580896323
Category	Term	Count	%	PValue	Genes	List Total	Pop Hits	Pop Total	Fold Enrichment	Bonferroni	Benjamini	FDR
SP_PIR_KEYWORDS	threonine protease	4	0.6993006993006993	0.02547318915544301	19167,26446,26443,73677	550	21	17854	6.1832e+15	0.9999372415922405	0.11666792829758532	2.99894e+16
GOTERM_CC_FAT	GO:0005839~proteasome core complex	4	0.6993006993006993	0.030345244743016662	19167,26446,26443,73677	434	20	12504	5.76221e+16	0.9999920360753282	0.108726384100575	3.47385e+15
GOTERM_MF_FAT	GO:0070003~threonine-type peptidase activity	4	0.6993006993006993	0.03862368453618055	19167,26446,26443,73677	482	21	13288	5.25114e+15	0.9999999999410798	0.40074117005430754	4.40933e+16
GOTERM_MF_FAT	GO:0004298~threonine-type endopeptidase activity	4	0.6993006993006993	0.03862368453618055	19167,26446,26443,73677	482	21	13288	5.25114e+15	0.9999999999410798	0.40074117005430754	4.40933e+16
Annotation Cluster 52	Enrichment Score: 1.4037401796242661
Category	Term	Count	%	PValue	Genes	List Total	Pop Hits	Pop Total	Fold Enrichment	Bonferroni	Benjamini	FDR
GOTERM_BP_FAT	GO:0000377~RNA splicing, via transesterification reactions with bulged adenosine as nucleophile	5	0.8741258741258742	0.03946933601234359	27374,15382,192159,76479,67465	477	37	13588	3.84951e+16	1.0	0.40881204299794094	4.93845e+15
GOTERM_BP_FAT	GO:0000375~RNA splicing, via transesterification reactions	5	0.8741258741258742	0.03946933601234359	27374,15382,192159,76479,67465	477	37	13588	3.84951e+16	1.0	0.40881204299794094	4.93845e+15
GOTERM_BP_FAT	GO:0000398~nuclear mRNA splicing, via spliceosome	5	0.8741258741258742	0.03946933601234359	27374,15382,192159,76479,67465	477	37	13588	3.84951e+16	1.0	0.40881204299794094	4.93845e+15
Annotation Cluster 53	Enrichment Score: 1.3350789123352027
Category	Term	Count	%	PValue	Genes	List Total	Pop Hits	Pop Total	Fold Enrichment	Bonferroni	Benjamini	FDR
GOTERM_BP_FAT	GO:0010638~positive regulation of organelle organization	7	1.22378e+16	0.009318639535358008	19353,18148,56431,19385,76709,12631,12343	477	52	13588	3.8347e+15	0.9999999126204308	0.1385257658473571	1.46412e+16
GOTERM_BP_FAT	GO:0051495~positive regulation of cytoskeleton organization	5	0.8741258741258742	0.012055615095697494	19353,56431,76709,12631,12343	477	26	13588	5.47815e+15	0.9999999992828414	0.1673094997101583	1.85423e+16
GOTERM_BP_FAT	GO:0051130~positive regulation of cellular component organization	9	1.57343e+16	0.06476161285795959	19353,18148,56431,60595,19385,76709,12631,71902,12343	477	122	13588	2.10145e+16	1.0	0.5464695027548518	6.7765e+15
GOTERM_BP_FAT	GO:0032273~positive regulation of protein polymerization	3	0.5244755244755245	0.1417336248984417	19353,76709,12343	477	19	13588	4.49785e+15	1.0	0.7958319413530152	9.24557e+15
GOTERM_BP_FAT	GO:0031334~positive regulation of protein complex assembly	3	0.5244755244755245	0.20477314545559594	19353,76709,12343	477	24	13588	3.5608e+16	1.0	0.8929693661959277	9.79231e+15
Annotation Cluster 54	Enrichment Score: 1.3175153793350283
Category	Term	Count	%	PValue	Genes	List Total	Pop Hits	Pop Total	Fold Enrichment	Bonferroni	Benjamini	FDR
UP_SEQ_FEATURE	repeat:Spectrin 4	5	0.8741258741258742	9.82486e+11	20740,20742,11426,109711,60595	542	14	16021	1.05568e+16	0.7935432636548891	0.046683205156614394	1.63312e+16
UP_SEQ_FEATURE	repeat:Spectrin 3	5	0.8741258741258742	0.0016929049631821485	20740,20742,11426,109711,60595	542	16	16021	9.2372e+15	0.9340866956881713	0.07086171898786475	2.79834e+15
UP_SEQ_FEATURE	repeat:Spectrin 2	5	0.8741258741258742	0.0026977889783623716	20740,20742,11426,109711,60595	542	18	16021	8.21084e+15	0.986908635748393	0.10521733505194142	4.4244e+15
UP_SEQ_FEATURE	repeat:Spectrin 1	5	0.8741258741258742	0.0026977889783623716	20740,20742,11426,109711,60595	542	18	16021	8.21084e+15	0.986908635748393	0.10521733505194142	4.4244e+15
UP_SEQ_FEATURE	calcium-binding region:5	3	0.5244755244755245	0.021353854570459	12321,19672,52377	542	7	16021	126681602530311	0.9999999999999991	0.4798631894767361	3.03425e+15
UP_SEQ_FEATURE	domain:EF-hand 6	3	0.5244755244755245	0.027842231919557953	12321,19672,52377	542	8	16021	1.10846e+16	1.0	0.5484636487469816	3.76876e+15
UP_SEQ_FEATURE	calcium-binding region:2	8	1.3986e+16	0.07889800256675286	20740,12321,11426,52377,109711,60595,12333,12334	542	110	16021	2.14975e+15	1.0	0.8277396618572741	7.4759e+15
UP_SEQ_FEATURE	calcium-binding region:4	3	0.5244755244755245	0.0792373776680923	12321,19672,52377	542	14	16021	633408012651555	1.0	0.8250734889205981	7.49143e+15
UP_SEQ_FEATURE	domain:EF-hand 5	3	0.5244755244755245	0.0792373776680923	12321,19672,52377	542	14	16021	633408012651555	1.0	0.8250734889205981	7.49143e+15
UP_SEQ_FEATURE	calcium-binding region:1	8	1.3986e+16	0.11179241288653233	20740,12321,19672,11426,109711,60595,12333,12334	542	120	16021	1.9706e+16	1.0	0.8933815869776758	8.62738e+15
UP_SEQ_FEATURE	domain:EF-hand 2	9	1.57343e+16	0.17437413986584935	20740,12321,19672,11426,52377,109711,60595,12333,12334	542	160	16021	1.6627e+16	1.0	0.9633696890609121	9.59635e+15
UP_SEQ_FEATURE	domain:EF-hand 1	9	1.57343e+16	0.17849096221281324	20740,12321,19672,11426,52377,109711,60595,12333,12334	542	161	16021	1.65237e+16	1.0	0.9639090718924663	9.62877e+15
UP_SEQ_FEATURE	domain:EF-hand 4	4	0.6993006993006993	0.2839755056033514	12321,19672,52377,12333	542	55	16021	2.14975e+15	1.0	0.9950495349064865	9.96286e+15
UP_SEQ_FEATURE	domain:EF-hand 3	5	0.8741258741258742	0.3001057637364739	20740,12321,19672,52377,12333	542	82	16021	1.80238e+15	1.0	0.9961521877115317	9.97464e+15
SP_PIR_KEYWORDS	calcium	20	3.4965e+16	0.8059839527751885	20740,22027,109711,60595,67268,12757,12333,12334,12321,22070,19672,21825,16971,107513,11426,52377,12558,12555,12306,12552	550	731	17854	0.8881482402686233	1.0	0.9887629967098182	99999999985544
GOTERM_MF_FAT	GO:0005509~calcium ion binding	22	3.84615e+16	0.9756194882692811	20740,22027,109711,60595,67268,12757,12333,12334,22288,12321,22070,20846,19672,21825,16971,107513,11426,52377,12558,12555,12306,12552	482	840	13288	0.7220312191266548	1.0	0.9999999507036021	100.0
Annotation Cluster 55	Enrichment Score: 1.27958631436921
Category	Term	Count	%	PValue	Genes	List Total	Pop Hits	Pop Total	Fold Enrichment	Bonferroni	Benjamini	FDR
GOTERM_BP_FAT	GO:0032886~regulation of microtubule-based process	6	1.04895e+15	0.01993765685804726	18148,17755,19385,15185,108000,12343	477	45	13588	3.79818e+16	0.9999999999999993	0.25274258758409274	2.88607e+15
GOTERM_BP_FAT	GO:0070507~regulation of microtubule cytoskeleton organization	5	0.8741258741258742	0.03616745765039295	18148,17755,19385,15185,12343	477	36	13588	3.95644e+15	1.0	0.3839774510241173	4.63606e+15
GOTERM_BP_FAT	GO:0000226~microtubule cytoskeleton organization	9	1.57343e+16	0.04108698408613239	56420,18148,17755,75786,22154,17886,19385,22143,12343	477	111	13588	2.30971e+16	1.0	0.419308280616266	5.08067e+15
GOTERM_BP_FAT	GO:0031110~regulation of microtubule polymerization or depolymerization	3	0.5244755244755245	0.2570149463552328	17755,15185,12343	477	28	13588	3.05211e+15	1.0	0.9375094920426936	9.93417e+15
Annotation Cluster 56	Enrichment Score: 1.2668809238711025
Category	Term	Count	%	PValue	Genes	List Total	Pop Hits	Pop Total	Fold Enrichment	Bonferroni	Benjamini	FDR
GOTERM_CC_FAT	GO:0031968~organelle outer membrane	8	1.3986e+16	0.03098660343961928	72416,26926,50790,11739,22333,74205,22335,22334	434	87	12504	2.64929e+16	0.9999938106273168	0.10991094150182967	3.53337e+16
GOTERM_CC_FAT	GO:0019867~outer membrane	8	1.3986e+16	0.036326608299274865	72416,26926,50790,11739,22333,74205,22335,22334	434	90	12504	2.56098e+16	0.9999992461592764	0.1267719285645761	4.00981e+15
SP_PIR_KEYWORDS	Porin	3	0.5244755244755245	0.04319602306585624	22333,22335,22334	550	11	17854	8.85322e+15	0.9999999356402396	0.18086251528241615	4.56711e+15
GOTERM_CC_FAT	GO:0005741~mitochondrial outer membrane	7	1.22378e+16	0.05860453709392534	26926,50790,11739,22333,74205,22335,22334	434	80	12504	2.52097e+15	0.9999999998983352	0.1918838235930066	5.66725e+15
SP_PIR_KEYWORDS	mitochondrion outer membrane	5	0.8741258741258742	0.16248809652277343	50790,22333,74205,22335,22334	550	69	17854	2.35231e+16	1.0	0.4961691586669855	9.13709e+15
Annotation Cluster 57	Enrichment Score: 1.1286855766886021
Category	Term	Count	%	PValue	Genes	List Total	Pop Hits	Pop Total	Fold Enrichment	Bonferroni	Benjamini	FDR
GOTERM_BP_FAT	GO:0006098~pentose-phosphate shunt	3	0.5244755244755245	0.029806541265989202	21991,110208,66171	477	8	13588	1.06824e+16	1.0	0.3324123046729852	4.00501e+15
GOTERM_BP_FAT	GO:0043603~cellular amide metabolic process	5	0.8741258741258742	0.04657156492815154	59027,21991,110208,11898,66171	477	39	13588	3.6521e+15	1.0	0.45115425216061944	5.53539e+15
GOTERM_BP_FAT	GO:0009820~alkaloid metabolic process	4	0.6993006993006993	0.05011793003287458	59027,21991,110208,66171	477	24	13588	4.74773e+15	1.0	0.46903247929878855	5.80803e+15
GOTERM_BP_FAT	GO:0046496~nicotinamide nucleotide metabolic process	4	0.6993006993006993	0.05011793003287458	59027,21991,110208,66171	477	24	13588	4.74773e+15	1.0	0.46903247929878855	5.80803e+15
GOTERM_BP_FAT	GO:0006769~nicotinamide metabolic process	4	0.6993006993006993	0.05011793003287458	59027,21991,110208,66171	477	24	13588	4.74773e+15	1.0	0.46903247929878855	5.80803e+15
GOTERM_BP_FAT	GO:0019362~pyridine nucleotide metabolic process	4	0.6993006993006993	0.07329860325251777	59027,21991,110208,66171	477	28	13588	4.06948e+15	1.0	0.5880774256529884	7.2395e+15
GOTERM_BP_FAT	GO:0006739~NADP metabolic process	3	0.5244755244755245	0.08441914289601186	21991,110208,66171	477	14	13588	6.10422e+15	1.0	0.6347955680494419	774922565828139
GOTERM_BP_FAT	GO:0006733~oxidoreduction coenzyme metabolic process	4	0.6993006993006993	0.14704509119978754	59027,21991,110208,66171	477	38	13588	2.99857e+16	1.0	0.8048091110119283	9.32074e+15
GOTERM_BP_FAT	GO:0019748~secondary metabolic process	4	0.6993006993006993	0.43694910037158874	59027,21991,110208,66171	477	69	13588	1.65138e+15	1.0	0.9876321567087423	9.99939e+15
Annotation Cluster 58	Enrichment Score: 1.0989985829835491
Category	Term	Count	%	PValue	Genes	List Total	Pop Hits	Pop Total	Fold Enrichment	Bonferroni	Benjamini	FDR
UP_SEQ_FEATURE	metal ion-binding site:Iron	7	1.22378e+16	0.00477920470783452	56420,18451,19053,26433,227699,19046,19045	542	47	16021	4.40241e+15	0.9995421696729154	0.163738763119738	7.71143e+15
SP_PIR_KEYWORDS	iron	13	2.27273e+15	0.28353528584870136	94280,18451,66445,56420,19053,11429,26433,14057,67680,227197,227699,19046,19045	550	321	17854	1.31465e+16	1.0	0.6960244913447162	99001781376619
GOTERM_MF_FAT	GO:0005506~iron ion binding	15	2.62238e+16	0.372427295797932	94280,18451,17709,66445,18984,56420,19053,11429,26433,14057,67680,227197,227699,19046,19045	482	343	13288	1.20562e+15	1.0	0.9593340400175437	998969574782479
Annotation Cluster 59	Enrichment Score: 1.0814480685114445
Category	Term	Count	%	PValue	Genes	List Total	Pop Hits	Pop Total	Fold Enrichment	Bonferroni	Benjamini	FDR
SP_PIR_KEYWORDS	LIM domain	6	1.04895e+15	0.07393151356774032	13008,13007,110829,22793,68337,16796	550	73	17854	2.66809e+16	0.9999999999996901	0.27387240712422734	6.53975e+15
UP_SEQ_FEATURE	domain:LIM zinc-binding 1	5	0.8741258741258742	0.087783541637943	13008,13007,110829,22793,68337	542	50	16021	2.9559e+16	1.0	0.8490136690856787	7.85421e+15
UP_SEQ_FEATURE	domain:LIM zinc-binding 2	5	0.8741258741258742	0.087783541637943	13008,13007,110829,22793,68337	542	50	16021	2.9559e+16	1.0	0.8490136690856787	7.85421e+15
Annotation Cluster 60	Enrichment Score: 1.0521404140588655
Category	Term	Count	%	PValue	Genes	List Total	Pop Hits	Pop Total	Fold Enrichment	Bonferroni	Benjamini	FDR
SP_PIR_KEYWORDS	coated pit	4	0.6993006993006993	0.0635768490969297	11771,16971,67300,12757	550	30	17854	4.32824e+15	0.9999999999799528	0.2441555584029621	5.96512e+15
GOTERM_CC_FAT	GO:0005905~coated pit	4	0.6993006993006993	0.09774776255622195	11771,16971,67300,12757	434	32	12504	3.60138e+15	1.0	0.28669465197434085	7.59383e+15
GOTERM_CC_FAT	GO:0030118~clathrin coat	4	0.6993006993006993	0.11224653215224886	11771,213827,67300,12757	434	34	12504	3.38954e+16	1.0	0.31915895871974054	807740300319701
Annotation Cluster 61	Enrichment Score: 1.0274093480386068
Category	Term	Count	%	PValue	Genes	List Total	Pop Hits	Pop Total	Fold Enrichment	Bonferroni	Benjamini	FDR
SP_PIR_KEYWORDS	blocked amino end	5	0.8741258741258742	0.014407360635300709	11843,11461,11844,14681,16905	550	31	17854	5.23578e+15	0.9956694377821289	0.06910242608876471	1.8169e+15
SP_PIR_KEYWORDS	myristate	7	1.22378e+16	0.11958898790621818	11843,19179,11844,22330,56327,14681,17357	550	109	17854	2.0847e+16	1.0	0.40164692906660093	8.27925e+15
SP_PIR_KEYWORDS	myristylation	3	0.5244755244755245	0.15660395686712572	11843,11844,14681	550	23	17854	4.23415e+15	1.0	0.48947229810412773	9.04944e+15
UP_SEQ_FEATURE	lipid moiety-binding region:N-myristoyl glycine	6	1.04895e+15	0.28792823769713893	11843,19179,11844,56327,14681,17357	542	106	16021	1.67315e+16	1.0	0.9952201083847225	9.96615e+15
Annotation Cluster 62	Enrichment Score: 1.0071248259927414
Category	Term	Count	%	PValue	Genes	List Total	Pop Hits	Pop Total	Fold Enrichment	Bonferroni	Benjamini	FDR
SP_PIR_KEYWORDS	Redox-active center	7	1.22378e+16	0.001131538787355323	72736,12304,53382,21672,18477,14827,71853	550	39	17854	5.82648e+15	0.34594726601246084	0.007978703549322619	1.55216e+16
GOTERM_BP_FAT	GO:0045454~cell redox homeostasis	8	1.3986e+16	0.005769932521784421	72736,26926,12304,53382,21672,18477,14827,71853	477	62	13588	3.67566e+15	0.9999566243381212	0.09123840943645156	9.32114e+15
UP_SEQ_FEATURE	domain:Thioredoxin	4	0.6993006993006993	0.09233907055408816	72736,53382,21672,18477	542	32	16021	3.69488e+15	1.0	0.8533558480646581	8.02683e+15
GOTERM_BP_FAT	GO:0019725~cellular homeostasis	16	2.7972e+15	0.22264290398070738	72736,13667,26926,14688,53382,18477,14827,14630,12729,12304,12709,18148,21672,227197,71853,224045	477	343	13588	1.32881e+16	1.0	0.9118756070765534	9.85858e+15
GOTERM_BP_FAT	GO:0042592~homeostatic process	20	3.4965e+16	0.6641890043956736	72736,13667,26926,14688,53382,12387,18477,14827,107476,14630,19353,12729,12304,12709,18148,21672,14057,227197,71853,224045	477	584	13588	0.9755607248499468	1.0	0.9990791063564481	1e+16
UP_SEQ_FEATURE	disulfide bond	17	2.97203e+15	1.0	72736,70361,22027,11657,53382,18477,14827,11287,21825,12304,16971,21672,12462,16004,21356,71853,114584	542	2379	16021	0.21122475411387154	1.0	1.0	100.0
SP_PIR_KEYWORDS	disulfide bond	19	3.32168e+16	1.0	72736,70361,11657,22027,27374,53382,18477,14827,11287,12304,21825,16971,18148,21672,12462,16004,21356,71853,114584	550	2469	17854	0.24980743031775837	1.0	1.0	100.0
Annotation Cluster 63	Enrichment Score: 0.9575041169155065
Category	Term	Count	%	PValue	Genes	List Total	Pop Hits	Pop Total	Fold Enrichment	Bonferroni	Benjamini	FDR
SP_PIR_KEYWORDS	prenylation	12	2.0979e+15	0.005227719597690587	14469,56445,19353,68365,66922,76308,15502,19345,19330,216344,53605,16905	550	145	17854	2.6865e+16	0.8599193534322357	0.028491203372212892	6.98607e+15
UP_SEQ_FEATURE	short sequence motif:Effector region	7	1.22378e+16	0.090934121542983	19353,68365,66922,76308,19345,19330,216344	542	92	16021	2.24906e+16	1.0	0.8523207939998659	797503496489094
UP_SEQ_FEATURE	lipid moiety-binding region:S-geranylgeranyl cysteine	7	1.22378e+16	0.10215693465312017	14469,19353,68365,76308,19345,19330,216344	542	95	16021	2.17803e+16	1.0	0.878665563359479	8.35546e+15
GOTERM_BP_FAT	GO:0007264~small GTPase mediated signal transduction	14	2.44755e+16	0.11999060765076947	68365,11843,13169,11844,56327,14569,29875,19353,76308,66922,22630,19345,19330,216344	477	258	13588	1.54577e+16	1.0	0.7458306110858599	8.8483e+15
SP_PIR_KEYWORDS	lipoprotein	21	3.67133e+16	0.35528851458407384	110611,68365,11843,11844,22330,56327,53605,16905,56445,14469,19353,76308,66922,15502,19345,19179,19330,216197,216344,14681,17357	550	589	17854	1.15738e+16	1.0	0.7730322181298711	9.97677e+15
UP_SEQ_FEATURE	propeptide:Removed in mature form	6	1.04895e+15	0.8688401140378241	14469,19353,66922,11464,19330,216344	542	220	16021	0.8061556524656156	1.0	0.9999999999774101	1e+16
Annotation Cluster 64	Enrichment Score: 0.8904542687030741
Category	Term	Count	%	PValue	Genes	List Total	Pop Hits	Pop Total	Fold Enrichment	Bonferroni	Benjamini	FDR
GOTERM_BP_FAT	GO:0000096~sulfur amino acid metabolic process	4	0.6993006993006993	0.04498480872093942	269378,232087,108156,14630	477	23	13588	4.95415e+15	1.0	0.4419159570826462	5.40807e+15
GOTERM_BP_FAT	GO:0006790~sulfur metabolic process	7	1.22378e+16	0.11187547667927275	269378,236539,14870,232087,108156,14630,15926	477	94	13588	2.12133e+15	1.0	0.7262051261222285	8.65492e+15
GOTERM_BP_FAT	GO:0044272~sulfur compound biosynthetic process	3	0.5244755244755245	0.4234834250956303	232087,108156,14630	477	41	13588	2.08437e+15	1.0	0.986260249748014	9.9991e+15
Annotation Cluster 65	Enrichment Score: 0.8728424276117571
Category	Term	Count	%	PValue	Genes	List Total	Pop Hits	Pop Total	Fold Enrichment	Bonferroni	Benjamini	FDR
SP_PIR_KEYWORDS	manganese	11	1.92308e+16	0.014234630364904037	56420,19053,14208,67834,269951,107476,15926,19046,19045,233789,74551	550	145	17854	2.46262e+16	0.9953752961744664	0.06917554298614936	1.79707e+16
UP_SEQ_FEATURE	metal ion-binding site:Manganese	5	0.8741258741258742	0.019644840738862995	56420,19053,19046,19045,74551	542	31	16021	4.76759e+15	0.9999999999999852	0.45794104694205284	2.82765e+16
GOTERM_MF_FAT	GO:0004722~protein serine/threonine phosphatase activity	5	0.8741258741258742	0.033344066701301876	56420,66525,14208,19046,19045	482	34	13288	4.05419e+15	0.9999999984418518	0.3627935044893523	3.93855e+16
GOTERM_MF_FAT	GO:0030145~manganese ion binding	11	1.92308e+16	0.042637594471001135	56420,19053,14208,67834,269951,107476,15926,19046,19045,233789,74551	482	148	13288	2.04901e+15	0.9999999999951731	0.40615462788227785	4.74419e+15
UP_SEQ_FEATURE	active site:Proton donor	9	1.57343e+16	0.2309816605063399	56420,236539,19053,80898,11564,76952,100044223,19046,19045	542	173	16021	1.53775e+16	1.0	0.985848844440266	9877174374751
SP_PIR_KEYWORDS	protein phosphatase	6	1.04895e+15	0.30965281538283373	56420,19053,14208,674044,19046,19045	550	120	17854	1.62309e+16	1.0	0.7238107321549396	9.94024e+15
GOTERM_MF_FAT	GO:0004721~phosphoprotein phosphatase activity	8	1.3986e+16	0.3123264610207068	56420,19053,66525,14208,26395,674044,19046,19045	482	152	13288	1.45097e+16	1.0	0.9369856014506426	996024816280421
GOTERM_MF_FAT	GO:0016791~phosphatase activity	10	1.74825e+16	0.5042166823025873	56420,19053,66525,14208,26395,674044,76952,19046,19045,11928	482	238	13288	1.15834e+16	1.0	0.9879234535576669	999968249664629
GOTERM_BP_FAT	GO:0006470~protein amino acid dephosphorylation	5	0.8741258741258742	0.5695398080859858	66525,14208,674044,19046,19045	477	114	13588	1.2494e+16	1.0	0.9969925038747512	9.99999e+15
GOTERM_BP_FAT	GO:0016311~dephosphorylation	5	0.8741258741258742	0.7327691032571435	66525,14208,674044,19046,19045	477	141	13588	1.01016e+16	1.0	0.9996679204293369	1e+16
Annotation Cluster 66	Enrichment Score: 0.8509283129529783
Category	Term	Count	%	PValue	Genes	List Total	Pop Hits	Pop Total	Fold Enrichment	Bonferroni	Benjamini	FDR
GOTERM_BP_FAT	GO:0006790~sulfur metabolic process	7	1.22378e+16	0.11187547667927275	269378,236539,14870,232087,108156,14630,15926	477	94	13588	2.12133e+15	1.0	0.7262051261222285	8.65492e+15
GOTERM_BP_FAT	GO:0006575~cellular amino acid derivative metabolic process	9	1.57343e+16	0.1222382604666588	269378,18451,236539,14870,232087,15452,20810,14630,15926	477	141	13588	1.81828e+16	1.0	0.7484518727308918	8.89704e+15
GOTERM_BP_FAT	GO:0006749~glutathione metabolic process	3	0.5244755244755245	0.20477314545559594	14870,14630,15926	477	24	13588	3.5608e+16	1.0	0.8929693661959277	9.79231e+15
Annotation Cluster 67	Enrichment Score: 0.7792235735456274
Category	Term	Count	%	PValue	Genes	List Total	Pop Hits	Pop Total	Fold Enrichment	Bonferroni	Benjamini	FDR
UP_SEQ_FEATURE	repeat:15	4	0.6993006993006993	0.056010879730672924	20020,13669,76936,16004	542	26	16021	4.54754e+15	1.0	0.7434645940660911	6.19229e+15
UP_SEQ_FEATURE	repeat:14	4	0.6993006993006993	0.09233907055408816	20020,13669,76936,16004	542	32	16021	3.69488e+15	1.0	0.8533558480646581	8.02683e+15
UP_SEQ_FEATURE	repeat:13	4	0.6993006993006993	0.10615436900187084	20020,13669,76936,16004	542	34	16021	3.47753e+15	1.0	0.8858314846393879	8.4739e+15
UP_SEQ_FEATURE	repeat:18	3	0.5244755244755245	0.11091635746569511	20020,13669,76936	542	17	16021	5.2163e+15	1.0	0.894211283336196	8.60453e+15
UP_SEQ_FEATURE	repeat:19	3	0.5244755244755245	0.11091635746569511	20020,13669,76936	542	17	16021	5.2163e+15	1.0	0.894211283336196	8.60453e+15
UP_SEQ_FEATURE	repeat:20	3	0.5244755244755245	0.11091635746569511	20020,13669,76936	542	17	16021	5.2163e+15	1.0	0.894211283336196	8.60453e+15
UP_SEQ_FEATURE	repeat:12	4	0.6993006993006993	0.11334707749067519	20020,13669,76936,16004	542	35	16021	3.37818e+16	1.0	0.8940899182646608	866707837946421
UP_SEQ_FEATURE	repeat:1	9	1.57343e+16	0.1285341069542972	19944,22323,71514,20020,76936,16004,19989,22330,19386	542	148	16021	1.79751e+15	1.0	0.9209825888238149	900203531382525
UP_SEQ_FEATURE	repeat:16	3	0.5244755244755245	0.13355100865629474	20020,13669,76936	542	19	16021	4.66722e+15	1.0	0.926798964482721	9.09403e+15
UP_SEQ_FEATURE	repeat:2	9	1.57343e+16	0.13934945139615157	19944,22323,71514,13669,76936,16004,19989,22330,19386	542	151	16021	1.7618e+16	1.0	0.9332138434990515	9.19041e+15
UP_SEQ_FEATURE	repeat:17	3	0.5244755244755245	0.14522684357037574	20020,13669,76936	542	20	16021	4.43386e+15	1.0	0.9390920563602869	9.27821e+15
UP_SEQ_FEATURE	repeat:11	4	0.6993006993006993	0.15183273229208133	20020,13669,76936,16004	542	40	16021	2.9559e+16	1.0	0.9452224724869689	9.36617e+15
UP_SEQ_FEATURE	repeat:9	4	0.6993006993006993	0.20247079884207095	20020,13669,76936,16004	542	46	16021	2.57035e+16	1.0	0.9772319487546375	9.77399e+15
UP_SEQ_FEATURE	repeat:10	4	0.6993006993006993	0.20247079884207095	20020,13669,76936,16004	542	46	16021	2.57035e+16	1.0	0.9772319487546375	9.77399e+15
UP_SEQ_FEATURE	repeat:6	5	0.8741258741258742	0.21825977262608576	20020,13669,76936,16004,19989	542	71	16021	2.08162e+16	1.0	0.9822734183472395	9.83832e+15
UP_SEQ_FEATURE	repeat:8	4	0.6993006993006993	0.311847809451578	20020,13669,76936,16004	542	58	16021	2.03855e+15	1.0	0.9968736702712425	998090142860494
UP_SEQ_FEATURE	repeat:5	5	0.8741258741258742	0.31542618868713096	20020,13669,76936,16004,19989	542	84	16021	1.75947e+16	1.0	0.9969501292285341	9.9825e+15
UP_SEQ_FEATURE	repeat:3	6	1.04895e+15	0.3747913122962185	71514,20020,76936,16004,19989,22330	542	119	16021	1.49037e+16	1.0	0.999128283908124	9.99617e+15
UP_SEQ_FEATURE	repeat:7	4	0.6993006993006993	0.39530218624659796	20020,13669,76936,16004	542	67	16021	1.76472e+16	1.0	0.9994332156294653	9997809821245
UP_SEQ_FEATURE	repeat:4	5	0.8741258741258742	0.44575358566806345	20020,13669,76936,16004,19989	542	101	16021	1.46332e+15	1.0	0.9998178655078609	9.99949e+15
Annotation Cluster 68	Enrichment Score: 0.7451550923855714
Category	Term	Count	%	PValue	Genes	List Total	Pop Hits	Pop Total	Fold Enrichment	Bonferroni	Benjamini	FDR
GOTERM_BP_FAT	GO:0010608~posttranscriptional regulation of gene expression	12	2.0979e+15	0.015025105109205593	13684,83701,19704,13665,20910,12567,56463,192176,224045,208643,19045,11991	477	148	13588	2.30971e+15	0.9999999999961445	0.2011869917678163	2.25848e+16
GOTERM_BP_FAT	GO:0006417~regulation of translation	7	1.22378e+16	0.1384785365417548	13684,19704,13665,12567,224045,208643,19045	477	100	13588	1.99405e+16	1.0	0.789610621642101	9.1957e+15
SP_PIR_KEYWORDS	translation regulation	3	0.5244755244755245	0.5812736653816207	13684,13665,208643	550	63	17854	1.5458e+15	1.0	0.9311505560769116	9.99994e+15
GOTERM_BP_FAT	GO:0032268~regulation of cellular protein metabolic process	8	1.3986e+16	0.864567684783822	13684,19704,13665,12567,22627,224045,208643,19045	477	280	13588	0.8138963761605271	1.0	0.9999546988452264	1e+16
Annotation Cluster 69	Enrichment Score: 0.7223999112042226
Category	Term	Count	%	PValue	Genes	List Total	Pop Hits	Pop Total	Fold Enrichment	Bonferroni	Benjamini	FDR
UP_SEQ_FEATURE	domain:HECT	4	0.6993006993006993	0.03240154553072247	17999,59026,70790,117146	542	21	16021	5.63029e+15	1.0	0.591812196337235	4.24063e+16
UP_SEQ_FEATURE	active site:Glycyl thioester intermediate	6	1.04895e+15	0.054676856540724426	17999,217342,59026,70790,22201,117146	542	61	16021	2.90745e+16	1.0	0.7399718353742114	6.10114e+15
GOTERM_MF_FAT	GO:0016881~acid-amino acid ligase activity	8	1.3986e+16	0.3951017718057115	67054,17999,217342,69116,59026,14630,70790,117146	482	166	13288	1.3286e+15	1.0	0.9658727432291359	9.99401e+15
GOTERM_MF_FAT	GO:0004842~ubiquitin-protein ligase activity	5	0.8741258741258742	0.5227545438035199	17999,217342,69116,59026,70790	482	104	13288	1.32541e+15	1.0	0.9900269236703845	9.99982e+15
GOTERM_MF_FAT	GO:0019787~small conjugating protein ligase activity	5	0.8741258741258742	0.6677661276496392	17999,217342,69116,59026,70790	482	125	13288	1.10274e+16	1.0	0.9980037207476274	1e+16
Annotation Cluster 70	Enrichment Score: 0.7004106381891838
Category	Term	Count	%	PValue	Genes	List Total	Pop Hits	Pop Total	Fold Enrichment	Bonferroni	Benjamini	FDR
UP_SEQ_FEATURE	metal ion-binding site:Iron	7	1.22378e+16	0.00477920470783452	56420,18451,19053,26433,227699,19046,19045	542	47	16021	4.40241e+15	0.9995421696729154	0.163738763119738	7.71143e+15
SP_PIR_KEYWORDS	dioxygenase	3	0.5244755244755245	0.6464331206016685	18451,26433,227699	550	71	17854	1.37163e+15	1.0	0.9558007676809568	999999422929688
GOTERM_MF_FAT	GO:0016702~oxidoreductase activity, acting on single donors with incorporation of molecular oxygen, incorporation of two atoms of oxygen	3	0.5244755244755245	0.7111255456010706	18451,26433,227699	482	68	13288	1.21626e+16	1.0	0.998756541735499	1e+16
GOTERM_MF_FAT	GO:0016701~oxidoreductase activity, acting on single donors with incorporation of molecular oxygen	3	0.5244755244755245	0.7186740016962222	18451,26433,227699	482	69	13288	1.19863e+16	1.0	0.9988540276998736	1e+16
Annotation Cluster 71	Enrichment Score: 0.6445062089549726
Category	Term	Count	%	PValue	Genes	List Total	Pop Hits	Pop Total	Fold Enrichment	Bonferroni	Benjamini	FDR
SP_PIR_KEYWORDS	Aminotransferase	3	0.5244755244755245	0.1675465483192799	14583,107435,107272	550	24	17854	4.05773e+15	1.0	0.5042588808535906	9.20638e+15
GOTERM_MF_FAT	GO:0008483~transaminase activity	3	0.5244755244755245	0.21511250667777634	14583,107435,107272	482	24	13288	3.44606e+15	1.0	0.8699795401222414	9.72004e+15
GOTERM_MF_FAT	GO:0016769~transferase activity, transferring nitrogenous groups	3	0.5244755244755245	0.3233554810237901	14583,107435,107272	482	32	13288	258454356846473	1.0	0.9420740170131567	9.96869e+15
Annotation Cluster 72	Enrichment Score: 0.6162353751087285
Category	Term	Count	%	PValue	Genes	List Total	Pop Hits	Pop Total	Fold Enrichment	Bonferroni	Benjamini	FDR
SP_PIR_KEYWORDS	Flavoprotein	7	1.22378e+16	0.09788677060837886	110826,26926,66108,67273,110842,18984,66945	550	103	17854	2.20614e+15	1.0	0.34591196884410114	759097308494991
SP_PIR_KEYWORDS	FAD	7	1.22378e+16	0.11958898790621818	110826,26926,66108,67273,110842,18984,66945	550	109	17854	2.0847e+16	1.0	0.40164692906660093	8.27925e+15
GOTERM_MF_FAT	GO:0009055~electron carrier activity	10	1.74825e+16	0.3098840939561669	110826,26926,17709,24015,110842,66445,67680,227197,18984,66945	482	202	13288	1.36478e+16	1.0	0.9396467042036997	9.95811e+15
UP_SEQ_FEATURE	nucleotide phosphate-binding region:FAD	4	0.6993006993006993	0.311847809451578	26926,110842,18984,66945	542	58	16021	2.03855e+15	1.0	0.9968736702712425	998090142860494
GOTERM_MF_FAT	GO:0050660~FAD binding	3	0.5244755244755245	0.7332734330113049	26926,110842,66945	482	71	13288	1.16486e+15	1.0	0.9990241901487805	1e+16
Annotation Cluster 73	Enrichment Score: 0.6089260902603306
Category	Term	Count	%	PValue	Genes	List Total	Pop Hits	Pop Total	Fold Enrichment	Bonferroni	Benjamini	FDR
GOTERM_BP_FAT	GO:0014075~response to amine stimulus	3	0.5244755244755245	0.15400773559835113	15452,234734,12631	477	20	13588	4.27296e+15	1.0	0.8187480511661468	9.40865e+15
GOTERM_BP_FAT	GO:0010243~response to organic nitrogen	3	0.5244755244755245	0.15400773559835113	15452,234734,12631	477	20	13588	4.27296e+15	1.0	0.8187480511661468	9.40865e+15
GOTERM_BP_FAT	GO:0009719~response to endogenous stimulus	7	1.22378e+16	0.6282560195412104	26395,232087,15452,234734,224045,12631,12343	477	184	13588	1.08372e+16	1.0	0.9986493218388243	1e+16
Annotation Cluster 74	Enrichment Score: 0.6015398407553293
Category	Term	Count	%	PValue	Genes	List Total	Pop Hits	Pop Total	Fold Enrichment	Bonferroni	Benjamini	FDR
UP_SEQ_FEATURE	compositionally biased region:Asp/Glu-rich (highly acidic)	7	1.22378e+16	2.88113e+12	67628,11737,18148,19387,66471,230598,56086	542	28	16021	7.38976e+15	0.37028507826536416	0.015821370525016865	0.48153384516821385
UP_SEQ_FEATURE	repeat:LRR 4	5	0.8741258741258742	0.9435802370897386	67628,11737,19387,66471,107702	542	221	16021	0.6687565744435724	1.0	0.9999999999999977	100.0
UP_SEQ_FEATURE	repeat:LRR 3	5	0.8741258741258742	0.9678726707826577	67628,11737,19387,66471,107702	542	245	16021	0.6032457263348143	1.0	1.0	100.0
SP_PIR_KEYWORDS	leucine-rich repeat	5	0.8741258741258742	0.9716155644511584	67628,11737,19387,66471,107702	550	275	17854	0.5902148760330578	1.0	0.9998473888821755	100.0
UP_SEQ_FEATURE	repeat:LRR 2	5	0.8741258741258742	0.9807385627672095	67628,11737,19387,66471,107702	542	266	16021	0.5556210637294342	1.0	1.0	100.0
UP_SEQ_FEATURE	repeat:LRR 1	5	0.8741258741258742	0.9807385627672095	67628,11737,19387,66471,107702	542	266	16021	0.5556210637294342	1.0	1.0	100.0
Annotation Cluster 75	Enrichment Score: 0.6010773494876888
Category	Term	Count	%	PValue	Genes	List Total	Pop Hits	Pop Total	Fold Enrichment	Bonferroni	Benjamini	FDR
GOTERM_MF_FAT	GO:0005080~protein kinase C binding	3	0.5244755244755245	0.05793575404466085	14694,192176,22628	482	11	13288	7.51867e+16	0.9999999999999997	0.4773817420681675	5.85653e+16
GOTERM_MF_FAT	GO:0019900~kinase binding	5	0.8741258741258742	0.37030138574715693	68473,14694,192176,22628,12343	482	85	13288	1.62167e+16	1.0	0.9598882300010374	9.98917e+15
GOTERM_MF_FAT	GO:0019901~protein kinase binding	3	0.5244755244755245	0.7332734330113049	14694,192176,22628	482	71	13288	1.16486e+15	1.0	0.9990241901487805	1e+16
Annotation Cluster 76	Enrichment Score: 0.6010190163750693
Category	Term	Count	%	PValue	Genes	List Total	Pop Hits	Pop Total	Fold Enrichment	Bonferroni	Benjamini	FDR
SP_PIR_KEYWORDS	4fe-4s	3	0.5244755244755245	0.15660395686712572	11429,67680,227197	550	23	17854	4.23415e+15	1.0	0.48947229810412773	9.04944e+15
GOTERM_MF_FAT	GO:0051539~4 iron, 4 sulfur cluster binding	3	0.5244755244755245	0.20171220982483934	11429,67680,227197	482	23	13288	3.59589e+15	1.0	0.8540639884404596	9.64056e+15
GOTERM_MF_FAT	GO:0051540~metal cluster binding	4	0.6993006993006993	0.2709338825157782	24015,11429,67680,227197	482	50	13288	2.20548e+16	1.0	0.9167867838253471	9.90579e+15
GOTERM_MF_FAT	GO:0051536~iron-sulfur cluster binding	4	0.6993006993006993	0.2709338825157782	24015,11429,67680,227197	482	50	13288	2.20548e+16	1.0	0.9167867838253471	9.90579e+15
SP_PIR_KEYWORDS	iron-sulfur	3	0.5244755244755245	0.42622935684929625	11429,67680,227197	550	47	17854	2.07203e+15	1.0	0.8365905594502299	9.99536e+15
Annotation Cluster 77	Enrichment Score: 0.581974416481054
Category	Term	Count	%	PValue	Genes	List Total	Pop Hits	Pop Total	Fold Enrichment	Bonferroni	Benjamini	FDR
SP_PIR_KEYWORDS	cell shape	3	0.5244755244755245	0.17861460508195726	218952,17886,20430	550	25	17854	3.89542e+15	1.0	0.5254146755217499	9.34038e+15
GOTERM_BP_FAT	GO:0008360~regulation of cell shape	4	0.6993006993006993	0.22683917724714905	218952,23837,17886,20430	477	47	13588	2.42437e+15	1.0	0.9152034604491676	9.87095e+15
GOTERM_BP_FAT	GO:0022604~regulation of cell morphogenesis	5	0.8741258741258742	0.443038756498991	218952,23837,17886,22629,20430	477	97	13588	1.46837e+16	1.0	0.9883934687362887	9.9995e+15
Annotation Cluster 78	Enrichment Score: 0.571938313933574
Category	Term	Count	%	PValue	Genes	List Total	Pop Hits	Pop Total	Fold Enrichment	Bonferroni	Benjamini	FDR
GOTERM_MF_FAT	GO:0031406~carboxylic acid binding	7	1.22378e+16	0.08743105676519024	18451,17999,97212,26433,107476,69719,14104	482	85	13288	2.27034e+15	1.0	0.5982264670965725	7.40927e+15
GOTERM_MF_FAT	GO:0016597~amino acid binding	3	0.5244755244755245	0.3367438709571252	17999,69719,14104	482	33	13288	2.50622e+15	1.0	0.9462299446643109	9.97669e+15
GOTERM_MF_FAT	GO:0043176~amine binding	3	0.5244755244755245	0.6534609361775798	17999,69719,14104	482	61	13288	1.35583e+16	1.0	0.9977427735148634	999999839455995
Annotation Cluster 79	Enrichment Score: 0.5688186471223831
Category	Term	Count	%	PValue	Genes	List Total	Pop Hits	Pop Total	Fold Enrichment	Bonferroni	Benjamini	FDR
UP_SEQ_FEATURE	repeat:Solcar 2	4	0.6993006993006993	0.21126906099648898	11739,18674,56428,11740	542	47	16021	2.51566e+15	1.0	0.9802964346198134	9.81232e+15
UP_SEQ_FEATURE	repeat:Solcar 1	4	0.6993006993006993	0.21126906099648898	11739,18674,56428,11740	542	47	16021	2.51566e+15	1.0	0.9802964346198134	9.81232e+15
UP_SEQ_FEATURE	repeat:Solcar 3	3	0.5244755244755245	0.44042529562130855	11739,18674,11740	542	44	16021	2.01539e+16	1.0	0.9998062382851031	9.9994e+15
Annotation Cluster 80	Enrichment Score: 0.5136037773333729
Category	Term	Count	%	PValue	Genes	List Total	Pop Hits	Pop Total	Fold Enrichment	Bonferroni	Benjamini	FDR
GOTERM_BP_FAT	GO:0006979~response to oxidative stress	6	1.04895e+15	0.1893246488096639	19053,26395,21672,18477,14630,15926	477	87	13588	1.96458e+15	1.0	0.876812921473734	9.71246e+15
GOTERM_BP_FAT	GO:0042542~response to hydrogen peroxide	3	0.5244755244755245	0.20477314545559594	19053,21672,18477	477	24	13588	3.5608e+16	1.0	0.8929693661959277	9.79231e+15
GOTERM_BP_FAT	GO:0000302~response to reactive oxygen species	3	0.5244755244755245	0.36109552488232516	19053,21672,18477	477	36	13588	2.37386e+16	1.0	0.974925838421273	9.99487e+15
GOTERM_BP_FAT	GO:0010035~response to inorganic substance	4	0.6993006993006993	0.6302061299474608	11657,19053,21672,18477	477	92	13588	1.23854e+16	1.0	0.9985932869277543	1e+16
Annotation Cluster 81	Enrichment Score: 0.5115666315034794
Category	Term	Count	%	PValue	Genes	List Total	Pop Hits	Pop Total	Fold Enrichment	Bonferroni	Benjamini	FDR
GOTERM_MF_FAT	GO:0051059~NF-kappaB binding	4	0.6993006993006993	0.04878679804945834	18148,22321,13001,114584	482	23	13288	4.79452e+15	0.9999999999998976	0.4374054814831214	5.22111e+15
GOTERM_BP_FAT	GO:0006986~response to unfolded protein	5	0.8741258741258742	0.12008355586030774	22321,13001,234734,15519,114584	477	54	13588	2.63763e+16	1.0	0.7439739065653839	8.85036e+15
GOTERM_BP_FAT	GO:0051789~response to protein stimulus	5	0.8741258741258742	0.3636284702563807	22321,13001,234734,15519,114584	477	87	13588	163714788308152	1.0	0.9753026574741624	9.9952e+15
GOTERM_BP_FAT	GO:0009991~response to extracellular stimulus	5	0.8741258741258742	0.6898524785040274	16828,11657,22321,13001,114584	477	133	13588	1.07092e+16	1.0	0.999366074259657	999999997470933
GOTERM_BP_FAT	GO:0007584~response to nutrient	3	0.5244755244755245	0.7507693780359341	22321,13001,114584	477	76	13588	1.12446e+16	1.0	0.9997413744992193	999999999937314
GOTERM_BP_FAT	GO:0031667~response to nutrient levels	4	0.6993006993006993	0.7724914784805749	11657,22321,13001,114584	477	115	13588	0.9908303709780331	1.0	0.9998151942165394	1e+16
Annotation Cluster 82	Enrichment Score: 0.4949038760615052
Category	Term	Count	%	PValue	Genes	List Total	Pop Hits	Pop Total	Fold Enrichment	Bonferroni	Benjamini	FDR
SP_PIR_KEYWORDS	Aminopeptidase	3	0.5244755244755245	0.1675465483192799	80898,75221,22019	550	24	17854	4.05773e+15	1.0	0.5042588808535906	9.20638e+15
GOTERM_MF_FAT	GO:0004177~aminopeptidase activity	3	0.5244755244755245	0.26926680469026254	80898,75221,22019	482	28	13288	2.95376e+16	1.0	0.9180207782761007	990255927669319
GOTERM_MF_FAT	GO:0008238~exopeptidase activity	3	0.5244755244755245	0.7260559183435309	80898,75221,22019	482	70	13288	1.18151e+16	1.0	0.9989429707944415	1e+16
Annotation Cluster 83	Enrichment Score: 0.4865504399492289
Category	Term	Count	%	PValue	Genes	List Total	Pop Hits	Pop Total	Fold Enrichment	Bonferroni	Benjamini	FDR
GOTERM_BP_FAT	GO:0006820~anion transport	8	1.3986e+16	0.17159858209195789	12729,11739,22333,22335,29876,114584,12343,22334	477	130	13588	1.75301e+16	1.0	0.8504443475447564	9.58549e+15
GOTERM_BP_FAT	GO:0006821~chloride transport	4	0.6993006993006993	0.3610178345923859	12729,29876,114584,12343	477	61	13588	1.86796e+15	1.0	0.9753373225027493	9.99486e+15
GOTERM_BP_FAT	GO:0015698~inorganic anion transport	4	0.6993006993006993	0.5601525639935585	12729,29876,114584,12343	477	83	13588	1.37284e+16	1.0	0.9967405666442488	9.99999e+15
Annotation Cluster 84	Enrichment Score: 0.4849463758272361
Category	Term	Count	%	PValue	Genes	List Total	Pop Hits	Pop Total	Fold Enrichment	Bonferroni	Benjamini	FDR
GOTERM_BP_FAT	GO:0046364~monosaccharide biosynthetic process	3	0.5244755244755245	0.2963786635607846	21991,110208,74551	477	31	13588	275674579022114	1.0	0.9562552775571203	9.97378e+15
GOTERM_BP_FAT	GO:0034637~cellular carbohydrate biosynthetic process	4	0.6993006993006993	0.31270894498826607	56351,21991,110208,74551	477	56	13588	2.03474e+15	1.0	0.963284113901725	9.98237e+15
GOTERM_BP_FAT	GO:0016051~carbohydrate biosynthetic process	5	0.8741258741258742	0.3315827027705087	14583,56351,21991,110208,74551	477	83	13588	1.71605e+16	1.0	0.9680952003327098	9.98899e+15
GOTERM_BP_FAT	GO:0046165~alcohol biosynthetic process	3	0.5244755244755245	0.3737966369979177	21991,110208,74551	477	37	13588	2.30971e+15	1.0	0.9775650610631955	9.99635e+15
Annotation Cluster 85	Enrichment Score: 0.47460948466327224
Category	Term	Count	%	PValue	Genes	List Total	Pop Hits	Pop Total	Fold Enrichment	Bonferroni	Benjamini	FDR
GOTERM_MF_FAT	GO:0008308~voltage-gated anion channel activity	5	0.8741258741258742	0.004262274361065584	22333,22335,29876,114584,22334	482	19	13288	725485913955012	0.9222523909507749	0.08431135438822657	6.11094e+15
SP_PIR_KEYWORDS	Porin	3	0.5244755244755245	0.04319602306585624	22333,22335,22334	550	11	17854	8.85322e+15	0.9999999356402396	0.18086251528241615	4.56711e+15
SP_PIR_KEYWORDS	mitochondrion outer membrane	5	0.8741258741258742	0.16248809652277343	50790,22333,74205,22335,22334	550	69	17854	2.35231e+16	1.0	0.4961691586669855	9.13709e+15
GOTERM_BP_FAT	GO:0006820~anion transport	8	1.3986e+16	0.17159858209195789	12729,11739,22333,22335,29876,114584,12343,22334	477	130	13588	1.75301e+16	1.0	0.8504443475447564	9.58549e+15
GOTERM_MF_FAT	GO:0005253~anion channel activity	5	0.8741258741258742	0.2395955741942409	22333,22335,29876,114584,22334	482	69	13288	1.99771e+16	1.0	0.8939419274918388	9.82464e+15
GOTERM_MF_FAT	GO:0008509~anion transmembrane transporter activity	5	0.8741258741258742	0.6974660976690678	22333,22335,29876,114584,22334	482	130	13288	1.06033e+15	1.0	0.9984958230731709	1e+16
GOTERM_MF_FAT	GO:0005244~voltage-gated ion channel activity	5	0.8741258741258742	0.892752499635228	22333,22335,29876,114584,22334	482	179	13288	0.7700688472148172	1.0	0.9999749857912841	1e+16
GOTERM_MF_FAT	GO:0022832~voltage-gated channel activity	5	0.8741258741258742	0.892752499635228	22333,22335,29876,114584,22334	482	179	13288	0.7700688472148172	1.0	0.9999749857912841	1e+16
GOTERM_MF_FAT	GO:0022836~gated channel activity	5	0.8741258741258742	0.9922088270673655	22333,22335,29876,114584,22334	482	281	13288	0.49054207705143155	1.0	0.9999999988571123	100.0
GOTERM_MF_FAT	GO:0005216~ion channel activity	5	0.8741258741258742	0.9989027836907362	22333,22335,29876,114584,22334	482	349	13288	0.3949636780843905	1.0	0.999999999999246	100.0
GOTERM_MF_FAT	GO:0022838~substrate specific channel activity	5	0.8741258741258742	0.9992098916083871	22333,22335,29876,114584,22334	482	360	13288	0.3828953434762563	1.0	0.9999999999997603	100.0
GOTERM_MF_FAT	GO:0015267~channel activity	5	0.8741258741258742	0.9993200582396996	22333,22335,29876,114584,22334	482	365	13288	0.3776502017848008	1.0	0.999999999999841	100.0
GOTERM_MF_FAT	GO:0022803~passive transmembrane transporter activity	5	0.8741258741258742	0.9993200582396996	22333,22335,29876,114584,22334	482	365	13288	0.3776502017848008	1.0	0.999999999999841	100.0
Annotation Cluster 86	Enrichment Score: 0.4372406126585218
Category	Term	Count	%	PValue	Genes	List Total	Pop Hits	Pop Total	Fold Enrichment	Bonferroni	Benjamini	FDR
GOTERM_BP_FAT	GO:0030199~collagen fibril organization	3	0.5244755244755245	0.16647648602643123	18451,12406,12306	477	21	13588	4.06948e+15	1.0	0.8425457550633748	9.53995e+15
GOTERM_BP_FAT	GO:0043062~extracellular structure organization	7	1.22378e+16	0.4233644156423202	22288,18451,12406,12387,56348,12558,12306	477	149	13588	1.33829e+16	1.0	0.9865012878530501	9.99909e+15
GOTERM_BP_FAT	GO:0030198~extracellular matrix organization	4	0.6993006993006993	0.6921670314519281	18451,12406,56348,12306	477	101	13588	1.12817e+16	1.0	0.9993788518650537	1e+16
Annotation Cluster 87	Enrichment Score: 0.429609097998628
Category	Term	Count	%	PValue	Genes	List Total	Pop Hits	Pop Total	Fold Enrichment	Bonferroni	Benjamini	FDR
GOTERM_MF_FAT	GO:0019842~vitamin binding	8	1.3986e+16	0.1492476885843543	18451,108037,11657,26433,107476,107272,14104,18293	482	121	13288	1.82271e+16	1.0	0.7688074239658009	9.08015e+15
GOTERM_MF_FAT	GO:0030170~pyridoxal phosphate binding	3	0.5244755244755245	0.5869924915580472	108037,11657,107272	482	54	13288	1.53158e+16	1.0	0.9949484050077798	9.99998e+15
GOTERM_MF_FAT	GO:0070279~vitamin B6 binding	3	0.5244755244755245	0.5869924915580472	108037,11657,107272	482	54	13288	1.53158e+16	1.0	0.9949484050077798	9.99998e+15
Annotation Cluster 88	Enrichment Score: 0.40465345760977534
Category	Term	Count	%	PValue	Genes	List Total	Pop Hits	Pop Total	Fold Enrichment	Bonferroni	Benjamini	FDR
SP_PIR_KEYWORDS	dynein	3	0.5244755244755245	0.1897901101584238	13427,13191,13424	550	26	17854	3.74559e+15	1.0	0.5422435935840533	9.45413e+15
GOTERM_CC_FAT	GO:0005875~microtubule associated complex	5	0.8741258741258742	0.26920313042849436	16573,17755,13427,13191,13424	434	76	12504	1.89546e+16	1.0	0.6214686042668673	9.87008e+15
GOTERM_CC_FAT	GO:0030286~dynein complex	3	0.5244755244755245	0.33036639696195136	13427,13191,13424	434	34	12504	2.54215e+16	1.0	0.7025835507133796	9.96128e+15
SP_PIR_KEYWORDS	motor protein	5	0.8741258741258742	0.5259145116041327	16573,17886,16562,13427,13424	550	123	17854	1.31959e+16	1.0	0.9048212710083798	999966786906692
GOTERM_MF_FAT	GO:0003774~motor activity	6	1.04895e+15	0.5628124145988294	16573,17886,16562,13427,13191,13424	482	138	13288	1.19863e+16	1.0	0.9935828768009023	9.99995e+15
GOTERM_MF_FAT	GO:0003777~microtubule motor activity	3	0.5244755244755245	0.7472241173812739	16573,16562,13424	482	73	13288	1.13295e+16	1.0	0.9992161638218804	999999998476341
Annotation Cluster 89	Enrichment Score: 0.387992238834181
Category	Term	Count	%	PValue	Genes	List Total	Pop Hits	Pop Total	Fold Enrichment	Bonferroni	Benjamini	FDR
GOTERM_BP_FAT	GO:0006073~cellular glucan metabolic process	3	0.5244755244755245	0.3224639651413313	56351,19046,19045	477	33	13588	2.58967e+16	1.0	0.9653427383620649	9.98616e+15
GOTERM_BP_FAT	GO:0044042~glucan metabolic process	3	0.5244755244755245	0.3224639651413313	56351,19046,19045	477	33	13588	2.58967e+16	1.0	0.9653427383620649	9.98616e+15
GOTERM_BP_FAT	GO:0005977~glycogen metabolic process	3	0.5244755244755245	0.3224639651413313	56351,19046,19045	477	33	13588	2.58967e+16	1.0	0.9653427383620649	9.98616e+15
GOTERM_BP_FAT	GO:0006112~energy reserve metabolic process	3	0.5244755244755245	0.3737966369979177	56351,19046,19045	477	37	13588	2.30971e+15	1.0	0.9775650610631955	9.99635e+15
GOTERM_BP_FAT	GO:0044264~cellular polysaccharide metabolic process	3	0.5244755244755245	0.447556456413883	56351,19046,19045	477	43	13588	1.98742e+15	1.0	0.9886542318033802	9.99956e+15
GOTERM_BP_FAT	GO:0005976~polysaccharide metabolic process	3	0.5244755244755245	0.837760309193144	56351,19046,19045	477	92	13588	0.928903472791906	1.0	0.9999339896521792	999999999999956
Annotation Cluster 90	Enrichment Score: 0.38475245989629975
Category	Term	Count	%	PValue	Genes	List Total	Pop Hits	Pop Total	Fold Enrichment	Bonferroni	Benjamini	FDR
GOTERM_BP_FAT	GO:0051270~regulation of cell motion	6	1.04895e+15	0.32100043712766824	19353,66922,21825,60595,22330,29876	477	107	13588	1.59737e+16	1.0	0.966435044583972	9.98564e+15
GOTERM_BP_FAT	GO:0030334~regulation of cell migration	5	0.8741258741258742	0.4035747524795955	19353,66922,21825,22330,29876	477	92	13588	1.54817e+16	1.0	0.9833717751122097	9.9984e+15
GOTERM_BP_FAT	GO:0040012~regulation of locomotion	5	0.8741258741258742	0.5411441992460527	19353,66922,21825,22330,29876	477	110	13588	1.29484e+16	1.0	0.9957171428984277	9.99998e+15
Annotation Cluster 91	Enrichment Score: 0.3740628441702422
Category	Term	Count	%	PValue	Genes	List Total	Pop Hits	Pop Total	Fold Enrichment	Bonferroni	Benjamini	FDR
GOTERM_MF_FAT	GO:0042803~protein homodimerization activity	10	1.74825e+16	0.2656278632566256	13722,109711,15452,60595,17886,21354,19989,108000,15519,21355	482	193	13288	1.42842e+16	1.0	0.9174992559774421	9.89515e+15
GOTERM_MF_FAT	GO:0042802~identical protein binding	12	2.0979e+15	0.4919214641272288	12468,13722,109711,15452,60440,60595,17886,21354,19989,108000,15519,21355	482	290	13288	1.14076e+16	1.0	0.9865345878301682	9.99954e+15
GOTERM_MF_FAT	GO:0046983~protein dimerization activity	13	2.27273e+15	0.5776197923500807	20740,109711,60595,17886,19989,14630,13722,15452,98732,21354,108000,15519,21355	482	340	13288	1.05409e+16	1.0	0.9945159896261622	9.99997e+15
Annotation Cluster 92	Enrichment Score: 0.35912867167598966
Category	Term	Count	%	PValue	Genes	List Total	Pop Hits	Pop Total	Fold Enrichment	Bonferroni	Benjamini	FDR
GOTERM_BP_FAT	GO:0021782~glial cell development	3	0.5244755244755245	0.19188521084006002	13667,236539,224045	477	23	13588	3.71561e+15	1.0	0.8791817047753244	9.72744e+15
GOTERM_BP_FAT	GO:0010001~glial cell differentiation	4	0.6993006993006993	0.2361891001704791	13667,236539,12387,224045	477	48	13588	2.37386e+16	1.0	0.9223816968514202	9.89495e+15
GOTERM_BP_FAT	GO:0042063~gliogenesis	4	0.6993006993006993	0.274166981710929	13667,236539,12387,224045	477	52	13588	2.19126e+16	1.0	0.9473062014949745	9.95565e+15
GOTERM_BP_FAT	GO:0019226~transmission of nerve impulse	8	1.3986e+16	0.6826460173776859	13667,11739,12387,20910,22333,224045,22335,12343	477	226	13588	1.00837e+16	1.0	0.9993051374385458	1e+16
GOTERM_BP_FAT	GO:0048608~reproductive structure development	4	0.6993006993006993	0.838666066573259	13667,12387,70465,224045	477	130	13588	0.8765037897113369	1.0	0.9999340083605562	1e+16
GOTERM_BP_FAT	GO:0003006~reproductive developmental process	5	0.8741258741258742	0.9842985188198115	13667,12034,12387,70465,224045	477	264	13588	0.5395146432882283	1.0	0.9999999664706887	100.0
Annotation Cluster 93	Enrichment Score: 0.3448831299241239
Category	Term	Count	%	PValue	Genes	List Total	Pop Hits	Pop Total	Fold Enrichment	Bonferroni	Benjamini	FDR
SP_PIR_KEYWORDS	thiol protease	6	1.04895e+15	0.31570135307872416	107260,74996,22225,22284,12333,12334	550	121	17854	1.60968e+16	1.0	0.7288655617178954	9.94708e+15
GOTERM_MF_FAT	GO:0004221~ubiquitin thiolesterase activity	4	0.6993006993006993	0.47705166176806313	231915,74996,22225,22284	482	71	13288	1.55315e+16	1.0	0.9852095251487681	9.9993e+15
GOTERM_MF_FAT	GO:0008234~cysteine-type peptidase activity	6	1.04895e+15	0.6130681494711967	107260,74996,22225,22284,12333,12334	482	146	13288	1.13295e+16	1.0	0.9963819922080709	9.99999e+15
Annotation Cluster 94	Enrichment Score: 0.3372514907818526
Category	Term	Count	%	PValue	Genes	List Total	Pop Hits	Pop Total	Fold Enrichment	Bonferroni	Benjamini	FDR
GOTERM_BP_FAT	GO:0007346~regulation of mitotic cell cycle	5	0.8741258741258742	0.4352013444631208	668829,19385,108000,22629,12534	477	96	13588	1.48367e+16	1.0	0.9880552842198044	99993620520053
GOTERM_BP_FAT	GO:0051726~regulation of cell cycle	9	1.57343e+16	0.4721525466053027	26754,18148,12567,668829,15481,19385,108000,22629,12534	477	214	13588	1.19803e+16	1.0	0.9912633568640581	9.9998e+15
GOTERM_BP_FAT	GO:0010564~regulation of cell cycle process	4	0.6993006993006993	0.4736668189777125	18148,19385,108000,22629	477	73	13588	1.5609e+15	1.0	0.9912725389244748	999980644009369
Annotation Cluster 95	Enrichment Score: 0.32776537912897385
Category	Term	Count	%	PValue	Genes	List Total	Pop Hits	Pop Total	Fold Enrichment	Bonferroni	Benjamini	FDR
GOTERM_BP_FAT	GO:0007049~cell cycle	28	4.8951e+15	0.1253301963483809	22152,75786,17886,12237,19385,56327,67628,17220,17216,17215,19704,18148,11426,17219,12567,668829,22154,11636,19046,19045,23997,14208,22284,236539,26395,53860,108000,12534	477	611	13588	1.30543e+15	1.0	0.7555839094525405	8.96093e+15
GOTERM_BP_FAT	GO:0022402~cell cycle process	19	3.32168e+16	0.14566144124017322	23997,14208,22152,75786,17886,12237,19385,22284,67628,236539,18148,11426,26395,668829,22154,108000,11636,12534,19045	477	393	13588	1.3772e+16	1.0	0.8034332395559202	9.30187e+15
GOTERM_BP_FAT	GO:0000279~M phase	13	2.27273e+15	0.28683699653057965	23997,22152,75786,12237,17886,19385,22284,26395,668829,22154,108000,19045,12534	477	283	13588	1.30856e+16	1.0	0.9521964744095215	996707099048662
GOTERM_BP_FAT	GO:0022403~cell cycle phase	14	2.44755e+16	0.3584648297226982	23997,22152,75786,12237,17886,19385,22284,67628,26395,668829,22154,108000,12534,19045	477	328	13588	1.21588e+16	1.0	0.9749544371413883	9.9945e+15
GOTERM_BP_FAT	GO:0000087~M phase of mitotic cell cycle	8	1.3986e+16	0.5224985690924413	22152,26395,75786,668829,12237,108000,22284,12534	477	194	13588	1.1747e+16	1.0	0.9950213957807766	9.99996e+15
GOTERM_BP_FAT	GO:0000278~mitotic cell cycle	9	1.57343e+16	0.6258697328924543	67628,22152,26395,75786,668829,12237,108000,22284,12534	477	244	13588	1.05073e+16	1.0	0.9986256445703849	999999939706582
GOTERM_BP_FAT	GO:0007059~chromosome segregation	3	0.5244755244755245	0.661504457089708	12237,108000,22284	477	64	13588	1.3353e+16	1.0	0.9990796455282686	999999988902114
SP_PIR_KEYWORDS	cell division	8	1.3986e+16	0.6761112307686736	75786,12567,53860,12237,19046,22284,12534,19045	550	256	17854	1.01443e+16	1.0	0.9650984344350214	1e+16
GOTERM_BP_FAT	GO:0007067~mitosis	6	1.04895e+15	0.8001556937619498	22152,26395,75786,12237,22284,12534	477	190	13588	0.8995696789142669	1.0	0.9998889277341573	1e+16
GOTERM_BP_FAT	GO:0000280~nuclear division	6	1.04895e+15	0.8001556937619498	22152,26395,75786,12237,22284,12534	477	190	13588	0.8995696789142669	1.0	0.9998889277341573	1e+16
SP_PIR_KEYWORDS	mitosis	5	0.8741258741258742	0.804592589093913	75786,12237,11461,22284,12534	550	179	17854	0.9067546978161503	1.0	0.9889114651703087	1e+16
GOTERM_BP_FAT	GO:0048285~organelle fission	6	1.04895e+15	0.824685581796292	22152,26395,75786,12237,22284,12534	477	197	13588	0.8676052740797497	1.0	0.9999298895175339	1e+16
Annotation Cluster 96	Enrichment Score: 0.3236048009974576
Category	Term	Count	%	PValue	Genes	List Total	Pop Hits	Pop Total	Fold Enrichment	Bonferroni	Benjamini	FDR
GOTERM_BP_FAT	GO:0016567~protein ubiquitination	4	0.6993006993006993	0.40879416029011995	17999,59026,15185,71902	477	66	13588	1.72645e+16	1.0	0.9841944012418531	9.99862e+15
GOTERM_BP_FAT	GO:0070647~protein modification by small protein conjugation or removal	5	0.8741258741258742	0.49685240315569945	17999,59026,15185,22284,71902	477	104	13588	1.36954e+15	1.0	0.993329918002307	999990963792953
GOTERM_BP_FAT	GO:0032446~protein modification by small protein conjugation	4	0.6993006993006993	0.5265668553953791	17999,59026,15185,71902	477	79	13588	1.44235e+16	1.0	0.9951073379973377	9.99997e+15
Annotation Cluster 97	Enrichment Score: 0.31762346953100373
Category	Term	Count	%	PValue	Genes	List Total	Pop Hits	Pop Total	Fold Enrichment	Bonferroni	Benjamini	FDR
GOTERM_BP_FAT	GO:0051146~striated muscle cell differentiation	5	0.8741258741258742	0.3796412475886872	22288,68794,11464,17886,12334	477	89	13588	1.60036e+16	1.0	0.9788304275823249	9.99688e+15
GOTERM_BP_FAT	GO:0042692~muscle cell differentiation	6	1.04895e+15	0.39080133423514024	22288,13008,68794,11464,17886,12334	477	117	13588	1.46084e+15	1.0	0.9810298157969406	9.99771e+15
GOTERM_BP_FAT	GO:0055002~striated muscle cell development	3	0.5244755244755245	0.5689115765546837	22288,68794,11464	477	54	13588	1.58258e+15	1.0	0.9970314890740969	9.99999e+15
GOTERM_BP_FAT	GO:0055001~muscle cell development	3	0.5244755244755245	0.6355239489206868	22288,68794,11464	477	61	13588	1.40097e+15	1.0	0.9986888825828149	1e+16
Annotation Cluster 98	Enrichment Score: 0.31332519166946454
Category	Term	Count	%	PValue	Genes	List Total	Pop Hits	Pop Total	Fold Enrichment	Bonferroni	Benjamini	FDR
GOTERM_MF_FAT	GO:0017048~Rho GTPase binding	3	0.5244755244755245	0.21511250667777634	192176,70435,20430	482	24	13288	3.44606e+15	1.0	0.8699795401222414	9.72004e+15
GOTERM_MF_FAT	GO:0017016~Ras GTPase binding	3	0.5244755244755245	0.6165795899845952	192176,70435,20430	482	57	13288	1.45097e+15	1.0	0.996375951680513	9.99999e+15
GOTERM_MF_FAT	GO:0031267~small GTPase binding	3	0.5244755244755245	0.6353850038535798	192176,70435,20430	482	59	13288	1.40179e+16	1.0	0.9971418314614228	1e+16
GOTERM_MF_FAT	GO:0051020~GTPase binding	3	0.5244755244755245	0.6622278896979761	192176,70435,20430	482	62	13288	1.33396e+16	1.0	0.9979327155604588	999999890020691
Annotation Cluster 99	Enrichment Score: 0.29054598205128807
Category	Term	Count	%	PValue	Genes	List Total	Pop Hits	Pop Total	Fold Enrichment	Bonferroni	Benjamini	FDR
GOTERM_BP_FAT	GO:0014031~mesenchymal cell development	3	0.5244755244755245	0.4939431990017282	15384,21849,12631	477	47	13588	1.81828e+16	1.0	0.9931877461249847	9.9999e+15
GOTERM_BP_FAT	GO:0048762~mesenchymal cell differentiation	3	0.5244755244755245	0.5161943748807676	15384,21849,12631	477	49	13588	1.74406e+16	1.0	0.9946471651822397	9.99995e+15
GOTERM_BP_FAT	GO:0060485~mesenchyme development	3	0.5244755244755245	0.5270742217134068	15384,21849,12631	477	50	13588	1.70918e+15	1.0	0.9949295886450916	9.99997e+15
Annotation Cluster 100	Enrichment Score: 0.2782794685245037
Category	Term	Count	%	PValue	Genes	List Total	Pop Hits	Pop Total	Fold Enrichment	Bonferroni	Benjamini	FDR
GOTERM_BP_FAT	GO:0010564~regulation of cell cycle process	4	0.6993006993006993	0.4736668189777125	18148,19385,108000,22629	477	73	13588	1.5609e+15	1.0	0.9912725389244748	999980644009369
GOTERM_CC_FAT	GO:0005813~centrosome	7	1.22378e+16	0.48022184398790757	56420,21454,13669,18148,19385,56327,108000	434	160	12504	1.26048e+15	1.0	0.8422478407697331	9.99884e+15
GOTERM_CC_FAT	GO:0005815~microtubule organizing center	7	1.22378e+16	0.6430529287191544	56420,21454,13669,18148,19385,56327,108000	434	189	12504	1.06708e+16	1.0	0.9357332394282301	99999936335265
Annotation Cluster 101	Enrichment Score: 0.2735577042998833
Category	Term	Count	%	PValue	Genes	List Total	Pop Hits	Pop Total	Fold Enrichment	Bonferroni	Benjamini	FDR
GOTERM_BP_FAT	GO:0043066~negative regulation of apoptosis	11	1.92308e+16	0.32536134947461165	22070,11657,218397,19053,21672,23837,12385,234734,14630,108000,22629	477	239	13588	1.31109e+16	1.0	0.966035290963515	9.98712e+15
GOTERM_BP_FAT	GO:0043069~negative regulation of programmed cell death	11	1.92308e+16	0.3482484046497532	22070,11657,218397,19053,21672,23837,12385,234734,14630,108000,22629	477	244	13588	1.28422e+16	1.0	0.9728833780969994	999281666904927
GOTERM_BP_FAT	GO:0060548~negative regulation of cell death	11	1.92308e+16	0.3524817411532718	22070,11657,218397,19053,21672,23837,12385,234734,14630,108000,22629	477	245	13588	1.27898e+16	1.0	0.9738741713309396	999356613168523
GOTERM_BP_FAT	GO:0042981~regulation of apoptosis	17	2.97203e+15	0.818544587950683	11657,68349,23837,60595,18477,14827,234734,14630,22070,218397,19053,20091,21672,12385,108000,22629,269523	477	553	13588	0.8757112908056303	1.0	0.9999248861808594	1e+16
GOTERM_BP_FAT	GO:0043067~regulation of programmed cell death	17	2.97203e+15	0.8328793494750941	11657,68349,23837,60595,18477,14827,234734,14630,22070,218397,19053,20091,21672,12385,108000,22629,269523	477	560	13588	0.86476489967056	1.0	0.9999352680195523	1e+16
GOTERM_BP_FAT	GO:0010941~regulation of cell death	17	2.97203e+15	0.838759818809625	11657,68349,23837,60595,18477,14827,234734,14630,22070,218397,19053,20091,21672,12385,108000,22629,269523	477	563	13588	0.8601569161909655	1.0	0.9999322625067908	1e+16
Annotation Cluster 102	Enrichment Score: 0.2681839026970475
Category	Term	Count	%	PValue	Genes	List Total	Pop Hits	Pop Total	Fold Enrichment	Bonferroni	Benjamini	FDR
GOTERM_BP_FAT	GO:0009408~response to heat	3	0.5244755244755245	0.30944637783183687	226101,224045,13211	477	32	13588	2.6706e+16	1.0	0.9623514315287894	9.9809e+15
GOTERM_BP_FAT	GO:0009266~response to temperature stimulus	3	0.5244755244755245	0.5377874008881081	226101,224045,13211	477	51	13588	1.67567e+16	1.0	0.9955904523010962	9.99998e+15
GOTERM_BP_FAT	GO:0009628~response to abiotic stimulus	6	1.04895e+15	0.9424368627832319	19353,14688,226101,232087,224045,13211	477	251	13588	0.6809491593374928	1.0	0.9999976800788153	100.0
Annotation Cluster 103	Enrichment Score: 0.24796395239889626
Category	Term	Count	%	PValue	Genes	List Total	Pop Hits	Pop Total	Fold Enrichment	Bonferroni	Benjamini	FDR
GOTERM_CC_FAT	GO:0019897~extrinsic to plasma membrane	4	0.6993006993006993	0.29695245188946096	19353,14688,14693,14681	434	55	12504	2.09535e+15	1.0	0.6612743034152185	9.92399e+15
GOTERM_CC_FAT	GO:0005834~heterotrimeric G-protein complex	3	0.5244755244755245	0.3431288817224214	14688,14693,14681	434	35	12504	2.46952e+16	1.0	0.7137679180712203	9.97034e+15
SP_PIR_KEYWORDS	transducer	3	0.5244755244755245	1.0	14688,14693,14681	550	1467	17854	0.06638408626138688	1.0	1.0	100.0
GOTERM_BP_FAT	GO:0007186~G-protein coupled receptor protein signaling pathway	4	0.6993006993006993	1.0	14688,192176,14693,14681	477	1877	13588	0.06070617616540958	1.0	1.0	100.0
Annotation Cluster 104	Enrichment Score: 0.23740616022845182
Category	Term	Count	%	PValue	Genes	List Total	Pop Hits	Pop Total	Fold Enrichment	Bonferroni	Benjamini	FDR
GOTERM_BP_FAT	GO:0006323~DNA packaging	6	1.04895e+15	0.2798139513575384	26926,17216,23942,53605,17955,56086	477	101	13588	1.69226e+16	1.0	0.9501695545678479	9.96114e+15
GOTERM_BP_FAT	GO:0006334~nucleosome assembly	4	0.6993006993006993	0.4736668189777125	17216,53605,17955,56086	477	73	13588	1.5609e+15	1.0	0.9912725389244748	999980644009369
GOTERM_BP_FAT	GO:0031497~chromatin assembly	4	0.6993006993006993	0.4916126900097737	17216,53605,17955,56086	477	75	13588	1.51927e+16	1.0	0.9931009682605642	9.99989e+15
GOTERM_BP_FAT	GO:0065004~protein-DNA complex assembly	4	0.6993006993006993	0.5004721691625884	17216,53605,17955,56086	477	76	13588	1.49928e+16	1.0	0.9935366352373813	9.99992e+15
GOTERM_BP_FAT	GO:0034728~nucleosome organization	4	0.6993006993006993	0.5004721691625884	17216,53605,17955,56086	477	76	13588	1.49928e+16	1.0	0.9935366352373813	9.99992e+15
GOTERM_BP_FAT	GO:0006333~chromatin assembly or disassembly	4	0.6993006993006993	0.7403999381065414	17216,53605,17955,56086	477	109	13588	1.04537e+16	1.0	0.9996967676748919	1e+16
GOTERM_BP_FAT	GO:0006325~chromatin organization	10	1.74825e+16	0.7789560203452103	17216,245688,107435,27374,59026,15185,23942,53605,17955,56086	477	315	13588	0.9043293068450302	1.0	0.9998294554783376	1e+16
GOTERM_BP_FAT	GO:0051276~chromosome organization	12	2.0979e+15	0.842815479758211	26926,17216,245688,107435,27374,59026,12237,15185,23942,53605,17955,56086	477	404	13588	0.8461298960084688	1.0	0.9999314948084753	1e+16
GOTERM_BP_FAT	GO:0016568~chromatin modification	6	1.04895e+15	0.9202534767024675	245688,107435,27374,59026,15185,23942	477	236	13588	0.7242298262445369	1.0	0.9999927416162536	100.0
Annotation Cluster 105	Enrichment Score: 0.22914105745216504
Category	Term	Count	%	PValue	Genes	List Total	Pop Hits	Pop Total	Fold Enrichment	Bonferroni	Benjamini	FDR
SP_PIR_KEYWORDS	Steroid biosynthesis	3	0.5244755244755245	0.3495373198081243	15490,56348,105787	550	40	17854	2.43464e+15	1.0	0.7691881360173344	9.97374e+15
GOTERM_BP_FAT	GO:0006694~steroid biosynthetic process	3	0.5244755244755245	0.716330791168526	15490,56348,105787	477	71	13588	1.20365e+16	1.0	0.9995836018351986	1e+16
GOTERM_BP_FAT	GO:0008202~steroid metabolic process	5	0.8741258741258742	0.8202942292426884	110611,15490,56348,22629,105787	477	161	13588	0.8846699740875295	1.0	0.9999220513702628	1e+16
Annotation Cluster 106	Enrichment Score: 0.2288817133776885
Category	Term	Count	%	PValue	Genes	List Total	Pop Hits	Pop Total	Fold Enrichment	Bonferroni	Benjamini	FDR
SP_PIR_KEYWORDS	Protease	19	3.32168e+16	0.29770421292110993	74996,22225,75221,26443,22284,73677,22019,12333,12334,19072,107260,19188,26754,19167,26446,80898,66624,230598,19184	550	509	17854	1.21174e+15	1.0	0.7135633898392344	9.92425e+15
GOTERM_BP_FAT	GO:0006508~proteolysis	38	6.64336e+15	0.4711228140862812	22027,22225,217342,17886,59026,75221,15185,26443,19386,67088,73677,12333,12334,22201,22273,19167,26446,66624,67003,230598,269523,19184,117146,231915,74996,17999,22186,70790,22019,22284,13194,107260,19072,19053,69116,80898,22230,71902	477	1034	13588	1.04689e+16	1.0	0.9913140882892234	9.99979e+15
GOTERM_MF_FAT	GO:0008233~peptidase activity	22	3.84615e+16	0.6817517063604919	74996,22225,23997,75221,26443,22284,73677,22019,12333,12334,22273,19188,19072,107260,26754,19167,26446,80898,66624,67003,230598,19184	482	629	13288	0.9642388299942607	1.0	0.9983363325324636	1e+16
GOTERM_MF_FAT	GO:0070011~peptidase activity, acting on L-amino acid peptides	19	3.32168e+16	0.8326609750607536	74996,22225,23997,75221,26443,22284,73677,22019,12333,12334,22273,19072,107260,26754,19167,26446,80898,67003,230598	482	603	13288	0.8686580926625517	1.0	0.9998320059617642	1e+16
GOTERM_MF_FAT	GO:0004175~endopeptidase activity	12	2.0979e+15	0.9006952507889523	19072,19167,23997,26446,67003,26443,230598,73677,22019,12333,12334,22273	482	421	13288	0.7857994697469963	1.0	0.9999810734512449	1e+16
Annotation Cluster 107	Enrichment Score: 0.224737176628671
Category	Term	Count	%	PValue	Genes	List Total	Pop Hits	Pop Total	Fold Enrichment	Bonferroni	Benjamini	FDR
GOTERM_CC_FAT	GO:0030427~site of polarized growth	3	0.5244755244755245	0.5315315206225719	22288,22240,59069	434	51	12504	1.69477e+16	1.0	0.8748783281917496	999972510267916
GOTERM_CC_FAT	GO:0030426~growth cone	3	0.5244755244755245	0.5315315206225719	22288,22240,59069	434	51	12504	1.69477e+16	1.0	0.8748783281917496	999972510267916
GOTERM_CC_FAT	GO:0043005~neuron projection	8	1.3986e+16	0.7494288751202397	22288,29875,12934,16573,22152,22240,19045,59069	434	245	12504	0.9407693031129503	1.0	0.9716434421821037	1e+16
Annotation Cluster 108	Enrichment Score: 0.22017239837937358
Category	Term	Count	%	PValue	Genes	List Total	Pop Hits	Pop Total	Fold Enrichment	Bonferroni	Benjamini	FDR
SP_PIR_KEYWORDS	tpr repeat	6	1.04895e+15	0.43768690972125085	66736,18451,20867,71919,74148,19386	550	141	17854	1.38135e+16	1.0	0.8420032852178049	9.99649e+15
UP_SEQ_FEATURE	repeat:TPR 3	5	0.8741258741258742	0.5675472550095028	66736,20867,71919,74148,19386	542	118	16021	1.2525e+16	1.0	0.9999898649666504	9.99999e+15
UP_SEQ_FEATURE	repeat:TPR 1	5	0.8741258741258742	0.6439423508498289	66736,20867,71919,74148,19386	542	130	16021	1.13689e+16	1.0	0.9999991063294906	1e+16
UP_SEQ_FEATURE	repeat:TPR 2	5	0.8741258741258742	0.6439423508498289	66736,20867,71919,74148,19386	542	130	16021	1.13689e+16	1.0	0.9999991063294906	1e+16
UP_SEQ_FEATURE	repeat:TPR 4	3	0.5244755244755245	0.7696237214341848	20867,71919,74148	542	82	16021	1.08143e+16	1.0	0.9999999944065175	1e+16
Annotation Cluster 109	Enrichment Score: 0.21637329893374915
Category	Term	Count	%	PValue	Genes	List Total	Pop Hits	Pop Total	Fold Enrichment	Bonferroni	Benjamini	FDR
GOTERM_BP_FAT	GO:0046651~lymphocyte proliferation	3	0.5244755244755245	0.43558927760404653	15452,21672,23918	477	42	13588	2.03474e+15	1.0	0.9878823223637788	9.99937e+15
GOTERM_BP_FAT	GO:0032943~mononuclear cell proliferation	3	0.5244755244755245	0.447556456413883	15452,21672,23918	477	43	13588	1.98742e+15	1.0	0.9886542318033802	9.99956e+15
GOTERM_BP_FAT	GO:0070661~leukocyte proliferation	3	0.5244755244755245	0.447556456413883	15452,21672,23918	477	43	13588	1.98742e+15	1.0	0.9886542318033802	9.99956e+15
GOTERM_BP_FAT	GO:0046649~lymphocyte activation	7	1.22378e+16	0.6639335441160248	15510,12387,15452,21672,18518,17886,23918	477	191	13588	1.044e+16	1.0	0.9990982436371575	1e+16
GOTERM_BP_FAT	GO:0042110~T cell activation	4	0.6993006993006993	0.7775125059392612	15510,12387,21672,17886	477	116	13588	0.9822887298489121	1.0	0.9998279625403041	1e+16
GOTERM_BP_FAT	GO:0045321~leukocyte activation	7	1.22378e+16	0.7839436617430167	15510,12387,15452,21672,18518,17886,23918	477	219	13588	0.9105233431932839	1.0	0.9998415006786822	1e+16
GOTERM_BP_FAT	GO:0001775~cell activation	7	1.22378e+16	0.8659587921928571	15510,12387,15452,21672,18518,17886,23918	477	246	13588	0.8105878543062159	1.0	0.9999557183896874	1e+16
Annotation Cluster 110	Enrichment Score: 0.21126853383884073
Category	Term	Count	%	PValue	Genes	List Total	Pop Hits	Pop Total	Fold Enrichment	Bonferroni	Benjamini	FDR
GOTERM_BP_FAT	GO:0000902~cell morphogenesis	14	2.44755e+16	0.28528708687974424	22323,15384,12387,17886,21849,12631,20430,19353,110829,11426,15452,20910,668829,12385	477	309	13588	1.29064e+16	1.0	0.9520148551044856	9.96584e+15
GOTERM_BP_FAT	GO:0000904~cell morphogenesis involved in differentiation	10	1.74825e+16	0.32215598993452	22323,19353,15384,12387,20910,15452,668829,17886,21849,20430	477	212	13588	1.3437e+16	1.0	0.9663611962993622	9.98605e+15
GOTERM_BP_FAT	GO:0032989~cellular component morphogenesis	15	2.62238e+16	0.3460489019346933	22323,15384,12387,17886,21849,12631,20430,19353,110829,11426,11464,15452,20910,668829,12385	477	351	13588	1.21737e+15	1.0	0.9725853069300857	9.9924e+15
GOTERM_BP_FAT	GO:0016358~dendrite development	3	0.5244755244755245	0.39887913753102044	19353,17755,15452	477	39	13588	2.19126e+15	1.0	0.9826297567530922	9.99817e+15
GOTERM_BP_FAT	GO:0030030~cell projection organization	12	2.0979e+15	0.5648979166938556	22323,19353,236539,17755,20910,15452,668829,17886,22330,12345,12631,20430	477	319	13588	1.07159e+16	1.0	0.9969070205534208	99999922560861
GOTERM_BP_FAT	GO:0031175~neuron projection development	8	1.3986e+16	0.6459177577746666	22323,19353,236539,17755,20910,15452,668829,20430	477	218	13588	1.04537e+16	1.0	0.9988589326637586	1e+16
GOTERM_BP_FAT	GO:0048812~neuron projection morphogenesis	6	1.04895e+15	0.7431321261839232	22323,19353,20910,15452,668829,20430	477	176	13588	0.9711263579188107	1.0	0.9996990158455121	1e+16
GOTERM_BP_FAT	GO:0048667~cell morphogenesis involved in neuron differentiation	6	1.04895e+15	0.7689066657938344	22323,19353,20910,15452,668829,20430	477	182	13588	0.9391112032621467	1.0	0.9998033284809592	1e+16
GOTERM_BP_FAT	GO:0007409~axonogenesis	5	0.8741258741258742	0.8275882577213176	22323,19353,20910,668829,20430	477	163	13588	0.873815127779707	1.0	0.9999320284529334	1e+16
GOTERM_BP_FAT	GO:0048858~cell projection morphogenesis	6	1.04895e+15	0.8406747804317338	22323,19353,20910,15452,668829,20430	477	202	13588	0.8461298960084688	1.0	0.999932576225429	1e+16
GOTERM_BP_FAT	GO:0007411~axon guidance	3	0.5244755244755245	0.8625855269172209	22323,19353,668829	477	98	13588	0.8720318316005649	1.0	0.9999526614478634	1e+16
GOTERM_BP_FAT	GO:0032990~cell part morphogenesis	6	1.04895e+15	0.8690646602868802	22323,19353,20910,15452,668829,20430	477	212	13588	0.8062181084608995	1.0	0.9999594441317536	1e+16
GOTERM_BP_FAT	GO:0048666~neuron development	8	1.3986e+16	0.8905308158989208	22323,19353,236539,17755,20910,15452,668829,20430	477	292	13588	0.7804485798799575	1.0	0.9999805584535525	1e+16
GOTERM_BP_FAT	GO:0030182~neuron differentiation	11	1.92308e+16	0.8971829153416568	22323,19353,236539,17755,22152,26395,20910,15452,668829,20430,108124	477	399	13588	0.7853386085759472	1.0	0.9999842990724503	100.0
Annotation Cluster 111	Enrichment Score: 0.2108931766166354
Category	Term	Count	%	PValue	Genes	List Total	Pop Hits	Pop Total	Fold Enrichment	Bonferroni	Benjamini	FDR
UP_SEQ_FEATURE	domain:Cadherin 5	3	0.5244755244755245	0.35676645105744287	12558,12555,12552	542	37	16021	2.39668e+15	1.0	0.998745667494507	9.99384e+15
UP_SEQ_FEATURE	domain:Cadherin 4	3	0.5244755244755245	0.44042529562130855	12558,12555,12552	542	44	16021	2.01539e+16	1.0	0.9998062382851031	9.9994e+15
UP_SEQ_FEATURE	domain:Cadherin 3	3	0.5244755244755245	0.45189801772635446	12558,12555,12552	542	45	16021	1.9706e+16	1.0	0.9998324761651702	999957773702759
UP_SEQ_FEATURE	domain:Cadherin 2	3	0.5244755244755245	0.48549001348339654	12558,12555,12552	542	48	16021	1.84744e+16	1.0	0.999920426131998	9.99985e+15
UP_SEQ_FEATURE	domain:Cadherin 1	3	0.5244755244755245	0.48549001348339654	12558,12555,12552	542	48	16021	1.84744e+16	1.0	0.999920426131998	9.99985e+15
GOTERM_BP_FAT	GO:0016337~cell-cell adhesion	7	1.22378e+16	0.8391696505395423	110829,12387,12558,17886,12555,23950,12552	477	236	13588	0.8449347972852931	1.0	0.9999311937373416	1e+16
GOTERM_BP_FAT	GO:0007156~homophilic cell adhesion	3	0.5244755244755245	0.9199761597238573	12558,12555,12552	477	117	13588	0.7304198247594474	1.0	0.999992854642806	100.0
SP_PIR_KEYWORDS	cleavage on pair of basic residues	4	0.6993006993006993	0.978763505337987	11657,12558,12555,12552	550	238	17854	0.5455767761650114	1.0	0.9999206196836165	100.0
UP_SEQ_FEATURE	topological domain:Extracellular	8	1.3986e+16	1.0	72736,15490,226101,16971,12558,68090,12555,12552	542	2174	16021	0.10877291845595549	1.0	1.0	100.0
Annotation Cluster 112	Enrichment Score: 0.19399631392038535
Category	Term	Count	%	PValue	Genes	List Total	Pop Hits	Pop Total	Fold Enrichment	Bonferroni	Benjamini	FDR
GOTERM_CC_FAT	GO:0016607~nuclear speck	5	0.8741258741258742	0.37938034335061227	18148,192159,13205,53890,76479	434	90	12504	1.60061e+16	1.0	0.7529303339164171	9.98649e+15
GOTERM_CC_FAT	GO:0016604~nuclear body	5	0.8741258741258742	0.7296461159593479	18148,192159,13205,53890,76479	434	142	12504	1.01447e+16	1.0	0.9662975029587167	1e+16
GOTERM_CC_FAT	GO:0044451~nucleoplasm part	13	2.27273e+15	0.9458536802861717	230233,12387,13205,76479,20020,245688,18148,26754,12567,192159,53890,23942,19184	434	513	12504	0.7301048319724041	1.0	0.9989929708698746	100.0
Annotation Cluster 113	Enrichment Score: 0.1907191926336966
Category	Term	Count	%	PValue	Genes	List Total	Pop Hits	Pop Total	Fold Enrichment	Bonferroni	Benjamini	FDR
GOTERM_BP_FAT	GO:0006928~cell motion	14	2.44755e+16	0.5226957541958801	22323,17886,12631,12343,19353,13722,15502,11426,56431,26395,12558,668829,11947,22627	477	367	13588	1.08667e+15	1.0	0.9949265541267137	9.99996e+15
GOTERM_BP_FAT	GO:0048870~cell motility	10	1.74825e+16	0.6676813775448842	19353,13722,15502,26395,12558,11947,17886,22627,12631,12343	477	284	13588	1.00304e+15	1.0	0.999116120425575	1e+16
GOTERM_BP_FAT	GO:0051674~localization of cell	10	1.74825e+16	0.6676813775448842	19353,13722,15502,26395,12558,11947,17886,22627,12631,12343	477	284	13588	1.00304e+15	1.0	0.999116120425575	1e+16
GOTERM_BP_FAT	GO:0016477~cell migration	8	1.3986e+16	0.7408592886502811	19353,13722,12558,11947,17886,22627,12631,12343	477	240	13588	0.9495457721872816	1.0	0.999691465990496	1e+16
Annotation Cluster 114	Enrichment Score: 0.1867949825351418
Category	Term	Count	%	PValue	Genes	List Total	Pop Hits	Pop Total	Fold Enrichment	Bonferroni	Benjamini	FDR
SP_PIR_KEYWORDS	cell cycle	14	2.44755e+16	0.6210338170761238	14208,75786,12237,56327,22284,17220,17216,17215,17219,12567,53860,19046,12534,19045	550	447	17854	1.0167e+15	1.0	0.9468373988586893	9.99998e+15
GOTERM_BP_FAT	GO:0051301~cell division	10	1.74825e+16	0.655362599114654	56431,75786,12567,17886,53860,12631,19046,22284,12534,19045	477	281	13588	1.01375e+16	1.0	0.9989925738972206	999999984958547
SP_PIR_KEYWORDS	cell division	8	1.3986e+16	0.6761112307686736	75786,12567,53860,12237,19046,22284,12534,19045	550	256	17854	1.01443e+16	1.0	0.9650984344350214	1e+16
Annotation Cluster 115	Enrichment Score: 0.17677458577400398
Category	Term	Count	%	PValue	Genes	List Total	Pop Hits	Pop Total	Fold Enrichment	Bonferroni	Benjamini	FDR
GOTERM_MF_FAT	GO:0008170~N-methyltransferase activity	3	0.5244755244755245	0.4765557640192977	212528,27374,15469	482	44	13288	1.87967e+16	1.0	0.9857905568830666	9.99929e+15
SP_PIR_KEYWORDS	s-adenosyl-l-methionine	3	0.5244755244755245	0.7579706751669564	212528,27374,15469	550	88	17854	1.10665e+16	1.0	0.9833007824340028	1e+16
SP_PIR_KEYWORDS	methyltransferase	4	0.6993006993006993	0.8164133772662795	108037,212528,27374,15469	550	142	17854	0.9144174135723432	1.0	0.9896733461340592	1e+16
Annotation Cluster 116	Enrichment Score: 0.17459843287315438
Category	Term	Count	%	PValue	Genes	List Total	Pop Hits	Pop Total	Fold Enrichment	Bonferroni	Benjamini	FDR
GOTERM_BP_FAT	GO:0001894~tissue homeostasis	3	0.5244755244755245	0.5270742217134068	19353,12387,107476	477	50	13588	1.70918e+15	1.0	0.9949295886450916	9.99997e+15
GOTERM_BP_FAT	GO:0048871~multicellular organismal homeostasis	3	0.5244755244755245	0.716330791168526	19353,12387,107476	477	71	13588	1.20365e+16	1.0	0.9995836018351986	1e+16
GOTERM_BP_FAT	GO:0060249~anatomical structure homeostasis	3	0.5244755244755245	0.7929016209947586	19353,12387,107476	477	83	13588	1.02963e+15	1.0	0.9998680127852031	999999999997263
Annotation Cluster 117	Enrichment Score: 0.1722366116336559
Category	Term	Count	%	PValue	Genes	List Total	Pop Hits	Pop Total	Fold Enrichment	Bonferroni	Benjamini	FDR
GOTERM_BP_FAT	GO:0042493~response to drug	5	0.8741258741258742	0.37163847477024736	97212,232087,14630,11928,12343	477	88	13588	1.61854e+16	1.0	0.9773347376324041	9.99613e+15
GOTERM_BP_FAT	GO:0003013~circulatory system process	3	0.5244755244755245	0.9048669958551709	14630,11928,12343	477	111	13588	0.7699019774491473	1.0	0.9999865900926639	100.0
GOTERM_BP_FAT	GO:0008015~blood circulation	3	0.5244755244755245	0.9048669958551709	14630,11928,12343	477	111	13588	0.7699019774491473	1.0	0.9999865900926639	100.0
Annotation Cluster 118	Enrichment Score: 0.168370590599525
Category	Term	Count	%	PValue	Genes	List Total	Pop Hits	Pop Total	Fold Enrichment	Bonferroni	Benjamini	FDR
GOTERM_BP_FAT	GO:0032386~regulation of intracellular transport	3	0.5244755244755245	0.43558927760404653	18477,192176,108000	477	42	13588	2.03474e+15	1.0	0.9878823223637788	9.99937e+15
GOTERM_BP_FAT	GO:0070201~regulation of establishment of protein localization	3	0.5244755244755245	0.716330791168526	18477,192176,108000	477	71	13588	1.20365e+16	1.0	0.9995836018351986	1e+16
GOTERM_BP_FAT	GO:0060341~regulation of cellular localization	5	0.8741258741258742	0.8202942292426884	18477,192176,18641,108000,67151	477	161	13588	0.8846699740875295	1.0	0.9999220513702628	1e+16
GOTERM_BP_FAT	GO:0032880~regulation of protein localization	3	0.5244755244755245	0.8286233764214065	18477,192176,108000	477	90	13588	0.9495457721872816	1.0	0.9999280329351667	1e+16
Annotation Cluster 119	Enrichment Score: 0.14048438099689742
Category	Term	Count	%	PValue	Genes	List Total	Pop Hits	Pop Total	Fold Enrichment	Bonferroni	Benjamini	FDR
GOTERM_BP_FAT	GO:0019725~cellular homeostasis	16	2.7972e+15	0.22264290398070738	72736,13667,26926,14688,53382,18477,14827,14630,12729,12304,12709,18148,21672,227197,71853,224045	477	343	13588	1.32881e+16	1.0	0.9118756070765534	9.85858e+15
GOTERM_BP_FAT	GO:0042592~homeostatic process	20	3.4965e+16	0.6641890043956736	72736,13667,26926,14688,53382,12387,18477,14827,107476,14630,19353,12729,12304,12709,18148,21672,14057,227197,71853,224045	477	584	13588	0.9755607248499468	1.0	0.9990791063564481	1e+16
GOTERM_BP_FAT	GO:0042391~regulation of membrane potential	4	0.6993006993006993	0.7920315427965807	13667,227197,14630,224045	477	119	13588	0.9575251484241495	1.0	0.9998687268931112	1e+16
GOTERM_BP_FAT	GO:0006873~cellular ion homeostasis	6	1.04895e+15	0.9539668106783289	13667,14688,12709,227197,14630,224045	477	261	13588	0.654859153232608	1.0	0.9999989570182128	100.0
GOTERM_BP_FAT

## Sheet: Differentiation
Annotation Cluster 1	Enrichment Score: 16.032851045717297
Category	Term	Count	%	PValue	Genes	List Total	Pop Hits	Pop Total	Fold Enrichment	Bonferroni	Benjamini	FDR
GOTERM_CC_FAT	GO:0043292~contractile fiber	27	703125	8.2555e-06	20740,20742,12955,14359,19309,109711,286940,21956,24131,17883,11464,17885,22138,14201,68794,12387,11472,13346,22330,12345,68016,22004,11475,22003,11474,11459,11937	301	95	12504	1.18065e+15	0.00269955	0.00269955	0.111767
GOTERM_CC_FAT	GO:0044449~contractile fiber part	26	6.77083e+15	9.16195e-06	20740,20742,12955,14359,19309,109711,286940,21956,24131,11464,17885,22138,14201,68794,12387,11472,13346,22330,12345,68016,22004,11475,22003,11474,11459,11937	301	86	12504	1.25591e+16	0.0299596	0.0149798	0.124039
GOTERM_CC_FAT	GO:0030016~myofibril	26	6.77083e+15	4.26244e-05	20740,20742,12955,14359,19309,109711,286940,21956,24131,17883,11464,17885,22138,14201,68794,12387,11472,13346,22330,12345,68016,22004,22003,11474,11459,11937	301	91	12504	1.1869e+16	0.139382	0.00464605	0.0577071
GOTERM_CC_FAT	GO:0030017~sarcomere	23	5.98958e+15	0.00778116	20740,14201,20742,12955,19309,12387,68794,109711,11472,286940,13346,12345,21956,68016,22004,24131,11464,11474,17885,22003,11459,22138,11937	301	80	12504	1.19432e+16	25.4444	6.3611	105.345
GOTERM_CC_FAT	GO:0015629~actin cytoskeleton	29	7.55208e+15	71.3611	20740,20742,109711,286940,17886,21956,17901,17883,11426,17885,22138,12306,14201,68794,11472,22330,21894,12345,22388,22004,17913,12340,11475,22003,11474,16332,12385,11459,76709	301	205	12504	5.87661e+15	233437	21221.9	96644.9
GOTERM_CC_FAT	GO:0031674~I band	16	4.16667e+15	975.645	20740,14201,12955,19309,12387,68794,109711,11472,286940,13346,12345,68016,24131,11464,22138,11937	301	53	12504	1.25408e+15	3.19042e+06	26586.8	1.3209e+07
GOTERM_CC_FAT	GO:0030018~Z disc	14	3.64583e+16	33717.5	20740,14201,12955,19309,68794,12387,109711,11472,286940,13346,12345,68016,24131,22138	301	46	12504	1.26431e+16	1.10256e+08	848127	4.56486e+07
Annotation Cluster 2	Enrichment Score: 14.183724224959011
Category	Term	Count	%	PValue	Genes	List Total	Pop Hits	Pop Total	Fold Enrichment	Bonferroni	Benjamini	FDR
GOTERM_CC_FAT	GO:0005856~cytoskeleton	75	1953125	3.23265	20740,22323,20742,13669,109272,114566,53622,320502,286940,17886,11461,16905,17901,24131,17883,11426,11464,17885,56430,332131,22138,12306,30960,74117,22142,14201,227613,12387,16573,11472,13346,71888,17698,22388,12345,22352,17913,12340,19053,11475,16332,11474,12385,16678,76709,22151,22793,16661,16664,109711,22152,16561,21956,21454,18148,22154,239673,67951,68045,110308,16593,100126226,68794,21894,22…	301	1122	12504	2.77684e+15	1089.13	217.604	455.191
GOTERM_CC_FAT	GO:0043228~non-membrane-bounded organelle	100	2.60417e+16	9.92176	22323,13669,20103,20102,320502,17886,11461,16905,17901,17883,11464,17885,56430,22138,67025,22142,14201,19291,11472,13346,71888,66480,17698,12345,17913,12340,11475,16332,11474,18538,16678,76709,22151,22793,16661,16664,22152,16561,668829,22154,110308,68794,100126226,21894,22004,19983,18008,22003,77055,53860,11459,13427,13424,20740,11837,76808,20742,114566,109272,53622,286940,16898,24131,11426,43354…	301	1919	12504	2.16475e+16	3231.08	4038.99	133782
GOTERM_CC_FAT	GO:0043232~intracellular non-membrane-bounded organelle	100	2.60417e+16	9.92176	22323,13669,20103,20102,320502,17886,11461,16905,17901,17883,11464,17885,56430,22138,67025,22142,14201,19291,11472,13346,71888,66480,17698,12345,17913,12340,11475,16332,11474,18538,16678,76709,22151,22793,16661,16664,22152,16561,668829,22154,110308,68794,100126226,21894,22004,19983,18008,22003,77055,53860,11459,13427,13424,20740,11837,76808,20742,114566,109272,53622,286940,16898,24131,11426,43354…	301	1919	12504	2.16475e+16	3231.08	4038.99	133782
GOTERM_CC_FAT	GO:0044430~cytoskeletal part	57	1484375	57.8585	20740,20742,13669,114566,53622,286940,17886,16905,17901,17883,17885,56430,332131,22138,12306,30960,22142,14201,227613,16573,11472,13346,71888,12345,22352,17913,12340,19053,16332,11474,16678,76709,22151,16661,16664,22152,109711,21956,16561,21454,18148,22154,239673,67951,110308,16593,100126226,223917,22004,18008,22003,77055,53860,11459,13427,68239,13424	301	774	12504	3.05926e+15	189145	1891.49	78315.1
Annotation Cluster 3	Enrichment Score: 12.182401894976271
Category	Term	Count	%	PValue	Genes	List Total	Pop Hits	Pop Total	Fold Enrichment	Bonferroni	Benjamini	FDR
SP_PIR_KEYWORDS	nucleotide-binding	94	2.44792e+16	0.00122509	18746,18747,107045,26908,13627,19309,22321,13629,17886,11461,74551,27267,233870,17883,11464,17885,19182,11947,19181,76952,22138,11636,269523,105148,19184,11946,15526,74117,22142,98878,237823,227613,16573,14828,70223,68015,20916,17913,11475,12715,22027,22151,217342,232087,22152,16561,22201,51797,15505,21454,20226,12709,67089,24015,85305,226414,22154,15481,15482,67951,23874,13681,107271,11928,11964…	377	1631	17854	2.72941e+15	0.418981	0.000837961	1.66977
SP_PIR_KEYWORDS	atp-binding	78	203125	0.237436	18746,18747,107045,22321,17886,11461,27267,17883,11464,17885,19182,19181,11947,22138,11636,269523,19184,105148,11946,15526,74117,98878,237823,16573,14828,70223,68015,20916,17913,11475,12715,22027,217342,232087,16561,22201,51797,21454,15505,20226,12709,67089,24015,85305,226414,15481,15482,13681,23874,107271,11928,11964,27053,12469,12468,12465,12466,104458,23996,12464,353172,18655,105787,110957,155…	377	1287	17854	2.87019e+16	0.812031	13.5338	323.62
GOTERM_MF_FAT	GO:0000166~nucleotide binding	116	3.02083e+16	0.584364	18746,18747,107045,26908,22321,17886,11461,74551,27267,75705,17883,11464,17885,110842,11947,22138,269523,11946,15526,22142,237823,14828,67834,68015,20916,17913,11475,12715,20823,26926,22151,217342,22152,15926,53607,16561,22201,51797,12709,24015,226414,22154,15481,15482,13681,11928,14228,12469,12468,12465,12466,23996,12464,269951,18655,110957,104112,12462,12461,53860,11459,19139,98758,11938,67059,…	337	2183	13288	2.09524e+15	2714.5	1356.69	799.361
GOTERM_MF_FAT	GO:0017076~purine nucleotide binding	100	2.60417e+16	119.593	18746,107045,18747,26908,22321,17886,11461,74551,27267,17883,11464,17885,110842,11947,22138,269523,11946,15526,22142,237823,14828,20916,68015,17913,11475,12715,26926,22151,217342,22152,16561,22201,51797,12709,24015,226414,15481,22154,15482,13681,11928,14228,12469,12468,12465,12466,23996,12464,18655,110957,104112,12462,53860,12461,11459,19139,11938,67059,11937,13424,13627,13629,233870,19182,19181,…	337	1871	13288	2.10744e+16	58470.2	194901	1.71652e+06
GOTERM_MF_FAT	GO:0030554~adenyl nucleotide binding	86	2.23958e+16	10638.6	18746,18747,107045,22321,17886,11461,27267,17883,11464,17885,110842,19182,19181,11947,22138,11636,269523,105148,19184,11946,15526,74117,98878,237823,16573,14828,13382,70223,68015,20916,17913,11475,67273,12715,66945,26926,22027,217342,232087,16561,22201,11370,51797,15505,21454,20226,12709,11409,67089,24015,85305,226414,15481,15482,13681,23874,107271,11928,11964,27053,12469,14228,12468,12465,12466,…	337	1535	13288	2.20912e+16	520206	1.30051e+06	1.52715e+07
GOTERM_MF_FAT	GO:0001883~purine nucleoside binding	86	2.23958e+16	1733.75	18746,18747,107045,22321,17886,11461,27267,17883,11464,17885,110842,19182,19181,11947,22138,11636,269523,105148,19184,11946,15526,74117,98878,237823,16573,14828,13382,70223,68015,20916,17913,11475,67273,12715,66945,26926,22027,217342,232087,16561,22201,11370,51797,15505,21454,20226,12709,11409,67089,24015,85305,226414,15481,15482,13681,23874,107271,11928,11964,27053,12469,14228,12468,12465,12466,…	337	1548	13288	2.19057e+16	847791	1.41299e+06	2.48882e+06
GOTERM_MF_FAT	GO:0001882~nucleoside binding	86	2.23958e+16	24044.6	18746,18747,107045,22321,17886,11461,27267,17883,11464,17885,110842,19182,19181,11947,22138,11636,269523,105148,19184,11946,15526,74117,98878,237823,16573,14828,13382,70223,68015,20916,17913,11475,67273,12715,66945,26926,22027,217342,232087,16561,22201,11370,51797,15505,21454,20226,12709,11409,67089,24015,85305,226414,15481,15482,13681,23874,107271,11928,11964,27053,12469,14228,12468,12465,12466,…	337	1558	13288	2.17651e+16	1.17576e+06	1.67965e+06	3.45162e+06
GOTERM_MF_FAT	GO:0032553~ribonucleotide binding	94	2.44792e+16	3205.35	18746,18747,107045,26908,13627,22321,13629,17886,11461,74551,27267,233870,17883,11464,17885,19182,11947,19181,22138,11636,269523,105148,19184,11946,15526,74117,22142,98878,237823,227613,16573,14828,70223,68015,20916,17913,11475,67273,12715,22027,22151,217342,232087,22152,16561,22201,51797,15505,21454,20226,12709,67089,24015,85305,226414,22154,15481,15482,67951,23874,13681,107271,11928,11964,27053…	337	1796	13288	2.06372e+16	1.5674e+07	1.95925e+06	4.60136e+06
GOTERM_MF_FAT	GO:0032555~purine ribonucleotide binding	94	2.44792e+16	3205.35	18746,18747,107045,26908,13627,22321,13629,17886,11461,74551,27267,233870,17883,11464,17885,19182,11947,19181,22138,11636,269523,105148,19184,11946,15526,74117,22142,98878,237823,227613,16573,14828,70223,68015,20916,17913,11475,67273,12715,22027,22151,217342,232087,22152,16561,22201,51797,15505,21454,20226,12709,67089,24015,85305,226414,22154,15481,15482,67951,23874,13681,107271,11928,11964,27053…	337	1796	13288	2.06372e+16	1.5674e+07	1.95925e+06	4.60136e+06
GOTERM_MF_FAT	GO:0005524~ATP binding	80	2.08333e+16	15447.7	18746,18747,107045,22321,17886,11461,27267,17883,11464,17885,19182,19181,11947,22138,11636,269523,105148,19184,11946,15526,74117,98878,237823,16573,14828,70223,68015,20916,17913,11475,67273,12715,22027,217342,232087,16561,22201,51797,15505,21454,20226,12709,67089,24015,85305,226414,15481,15482,13681,23874,107271,11928,11964,27053,14228,12469,12468,12465,12466,104458,23996,12464,353172,18655,10578…	337	1443	13288	2.18602e+16	755395	686723	2.21758e+08
GOTERM_MF_FAT	GO:0032559~adenyl ribonucleotide binding	80	2.08333e+16	279429	18746,18747,107045,22321,17886,11461,27267,17883,11464,17885,19182,19181,11947,22138,11636,269523,105148,19184,11946,15526,74117,98878,237823,16573,14828,70223,68015,20916,17913,11475,67273,12715,22027,217342,232087,16561,22201,51797,15505,21454,20226,12709,67089,24015,85305,226414,15481,15482,13681,23874,107271,11928,11964,27053,14228,12469,12468,12465,12466,104458,23996,12464,353172,18655,10578…	337	1460	13288	2.16056e+15	1.36641e+08	1.13867e+07	4.0113e+07
UP_SEQ_FEATURE	nucleotide phosphate-binding region:ATP	36	9375	0.0016191985644899787	18747,232087,17886,16561,22201,20226,12709,17883,67089,85305,17885,19182,11947,19181,22138,11636,13681,269523,19184,11946,11964,98878,237823,16573,23996,353172,18655,105787,17913,110957,104112,19179,12715,19139,67059,13424	366	907	16021	1.73742e+15	0.9260348312703415	0.09892468965405954	2.67845e+15
Annotation Cluster 4	Enrichment Score: 11.867204756740426
Category	Term	Count	%	PValue	Genes	List Total	Pop Hits	Pop Total	Fold Enrichment	Bonferroni	Benjamini	FDR
GOTERM_BP_FAT	GO:0006412~translation	52	1.35417e+16	1.95112e-13	11837,76808,107045,26908,13669,20103,56347,13627,22321,13665,13629,20102,16898,55949,67160,27267,233870,75705,433546,20091,54709,67025,105148,72946,27367,19921,22186,270106,66480,70223,26961,27979,20226,85305,226414,668829,13681,23874,107271,208643,19896,104458,100044332,353172,27050,67891,13722,19983,68135,19899,66656,16785	318	319	13588	6.96532e+15	2.60084e-10	2.60084e-10	3.19556e-10
SP_PIR_KEYWORDS	ribonucleoprotein	28	7.29167e+15	152911	11837,76808,26961,23983,18521,20103,20102,16898,53607,76936,433546,20091,668829,67025,15387,27367,19921,19896,22186,270106,66480,27050,67891,19983,19899,98758,16785,11991	377	266	17854	4.98506e+15	52295.6	475414	2.08414e+08
SP_PIR_KEYWORDS	ribosomal protein	21	546875	1.0717e+07	11837,76808,26961,27367,20103,19921,19896,20102,22186,270106,66480,16898,27050,67891,19983,433546,20091,668829,19899,67025,16785	377	177	17854	561875646270737	3.66523e+09	1.92907e+08	1.46071e+10
GOTERM_MF_FAT	GO:0003735~structural constituent of ribosome	21	546875	1.34462e+07	11837,76808,26961,27367,20103,19921,19896,20102,22186,270106,66480,16898,27050,67891,19983,433546,20091,668829,19899,67025,16785	337	151	13288	5.48368e+15	6.5752e+08	4.69657e+08	1.93025e+09
GOTERM_CC_FAT	GO:0005840~ribosome	22	5.72917e+15	6.61856e+07	11837,76808,26961,27367,20103,19921,19896,20102,22186,270106,66480,16898,27050,67891,19983,18148,433546,20091,668829,19899,67025,16785	301	192	12504	4.75997e+15	2.16427e+10	1.08213e+09	8.96054e+09
GOTERM_CC_FAT	GO:0030529~ribonucleoprotein complex	32	8.33333e+15	2.20095e+09	11837,76808,26961,23983,18521,20103,13629,20102,16898,53607,76936,433546,18148,20091,668829,67025,15387,27367,19921,19896,22186,270106,66480,101943,27050,67891,19983,20823,19899,98758,16785,11991	301	462	12504	2.87734e+16	7.19686e+10	2.5704e+10	2.97976e+11
Annotation Cluster 5	Enrichment Score: 11.135408566077258
Category	Term	Count	%	PValue	Genes	List Total	Pop Hits	Pop Total	Fold Enrichment	Bonferroni	Benjamini	FDR
GOTERM_CC_FAT	GO:0042470~melanosome	22	5.72917e+15	0.485063	269378,22027,18453,11749,54401,12464,103963,18477,14828,14827,14104,12321,22631,12304,15516,15481,22627,22042,67300,15519,12306,71853	301	85	12504	1.07519e+16	1452.17	242.029	599.52
GOTERM_CC_FAT	GO:0048770~pigment granule	22	5.72917e+15	0.485063	269378,22027,18453,11749,54401,12464,103963,18477,14828,14827,14104,12321,22631,12304,15516,15481,22627,22042,67300,15519,12306,71853	301	85	12504	1.07519e+16	1452.17	242.029	599.52
GOTERM_CC_FAT	GO:0031988~membrane-bounded vesicle	35	9.11458e+15	469211	269378,68938,22027,103963,109711,66471,11674,16561,12321,22631,12304,15481,434246,22042,12306,11749,18453,54401,12464,18477,14828,14827,353172,13382,12847,14104,15516,13722,13885,15510,22627,67300,15519,23970,71853	301	420	12504	3.46179e+16	1.53432e+09	1.02288e+08	6.35243e+08
GOTERM_CC_FAT	GO:0031982~vesicle	39	1015625	742493	269378,68938,22027,103963,26903,109711,66471,11674,16561,29876,12321,22631,12304,15481,434246,22042,12306,11749,18453,226101,16593,54401,12464,18477,14828,14827,353172,13382,12847,14104,13722,15516,13885,15510,22627,67300,15519,23970,71853	301	519	12504	3.12162e+16	2.42795e+09	1.51747e+08	1.00523e+10
GOTERM_CC_FAT	GO:0016023~cytoplasmic membrane-bounded vesicle	34	8.85417e+15	1.27975e+06	269378,22027,103963,109711,66471,11674,16561,12321,22631,12304,15481,434246,22042,12306,11749,18453,54401,12464,18477,14828,14827,353172,13382,12847,14104,15516,13722,13885,15510,22627,67300,15519,23970,71853	301	414	12504	3.41162e+16	4.1848e+09	2.32489e+06	1.7326e+10
GOTERM_CC_FAT	GO:0031410~cytoplasmic vesicle	38	9.89583e+15	1.46813e+07	269378,22027,103963,26903,109711,66471,11674,16561,29876,12321,22631,12304,15481,434246,22042,12306,11749,18453,226101,16593,54401,12464,18477,14828,14827,353172,13382,12847,14104,13722,15516,13885,15510,22627,67300,15519,23970,71853	301	508	12504	310743715175138	4.80078e+08	2.52673e+08	1.98763e+09
Annotation Cluster 6	Enrichment Score: 11.00401531813634
Category	Term	Count	%	PValue	Genes	List Total	Pop Hits	Pop Total	Fold Enrichment	Bonferroni	Benjamini	FDR
SP_PIR_KEYWORDS	molecular chaperone	11	2.86458e+15	141.594	12469,15505,22027,12465,12466,15510,12406,12464,12462,15481,12461	377	14	17854	3.72099e+15	4860.11	694.333	193734
SP_PIR_KEYWORDS	Chaperone	23	5.98958e+15	799.393	12469,22027,18453,12468,12465,12466,12464,70356,68015,56445,21454,245688,15516,15510,12406,18148,24015,12462,15481,12461,15482,15519,15526	377	150	17854	726157382847038	2.73381e+06	34172.7	1.08951e+07
GOTERM_MF_FAT	GO:0051082~unfolded protein binding	18	46875	11029.4	12469,22027,12468,12465,12466,12464,320011,68015,56445,21454,15516,18148,12406,12462,15481,12461,15519,15526	337	70	13288	1.01392e+16	539316	1.07863e+06	1.58324e+07
GOTERM_CC_FAT	GO:0005832~chaperonin-containing T-complex	7	1.82292e+16	1.24554e+07	21454,12468,12465,12466,12464,12462,12461	301	7	12504	4.15415e+16	4.07292e+09	2.39583e+08	1.68628e+10
GOTERM_BP_FAT	GO:0006457~protein folding	18	46875	6.14058e+06	14228,12469,22027,12468,12465,12466,12464,68015,15505,56445,21454,15516,15510,15481,12462,12461,15519,15526	318	127	13588	6.05616e+15	8.18536e+08	4.3081e+08	1.00571e+11
Annotation Cluster 7	Enrichment Score: 10.851893337260707
Category	Term	Count	%	PValue	Genes	List Total	Pop Hits	Pop Total	Fold Enrichment	Bonferroni	Benjamini	FDR
GOTERM_BP_FAT	GO:0006006~glucose metabolic process	24	6.25	1458.9	18746,68263,17449,19309,13808,66171,11674,18655,74551,105787,100042025,18293,16828,13722,235339,18597,16332,21991,14387,239017,100044223,19046,19045,77559	318	140	13588	7.32507e+15	1.94462e+06	64820.8	2.38931e+06
GOTERM_BP_FAT	GO:0044275~cellular carbohydrate catabolic process	17	4.42708e+15	3126.57	18746,68263,17449,19309,13808,66171,11674,100042025,18293,18655,16828,235339,18597,21991,14387,239017,100044223	318	60	13588	1.21067e+16	4.16748e+06	1.04187e+06	512046
GOTERM_BP_FAT	GO:0006007~glucose catabolic process	15	390625	8463.11	18746,17449,68263,13808,66171,11674,100042025,18293,18655,16828,235339,18597,21991,239017,100044223	318	52	13588	1.23258e+16	1.12813e+08	2.25627e+07	1.3861e+08
GOTERM_BP_FAT	GO:0019320~hexose catabolic process	15	390625	8463.11	18746,17449,68263,13808,66171,11674,100042025,18293,18655,16828,235339,18597,21991,239017,100044223	318	52	13588	1.23258e+16	1.12813e+08	2.25627e+07	1.3861e+08
GOTERM_BP_FAT	GO:0019318~hexose metabolic process	24	6.25	8486.58	18746,68263,17449,19309,13808,66171,11674,18655,74551,105787,100042025,18293,16828,13722,235339,18597,16332,21991,14387,239017,100044223,19046,19045,77559	318	169	13588	6.0681e+16	1.13126e+08	1.88543e+06	1.38993e+08
GOTERM_BP_FAT	GO:0006096~glycolysis	14	3.64583e+16	128682	18746,17449,68263,13808,11674,100042025,18293,18655,16828,235339,18597,21991,239017,100044223	318	44	13588	1.35958e+15	1.71532e+07	2.14416e+07	2.10756e+08
GOTERM_BP_FAT	GO:0046365~monosaccharide catabolic process	15	390625	1488.72	18746,17449,68263,13808,66171,11674,100042025,18293,18655,16828,235339,18597,21991,239017,100044223	318	54	13588	1.18693e+16	1.98446e+07	2.20496e+06	2.43824e+08
GOTERM_BP_FAT	GO:0016052~carbohydrate catabolic process	17	4.42708e+15	450917	18746,68263,17449,19309,13808,66171,11674,100042025,18293,18655,16828,235339,18597,21991,14387,239017,100044223	318	81	13588	8.96793e+15	6.01072e+07	6.01072e+06	7.38516e+07
GOTERM_BP_FAT	GO:0005996~monosaccharide metabolic process	24	6.25	1.07474e+06	18746,68263,17449,19309,13808,66171,11674,18655,74551,105787,100042025,18293,16828,13722,235339,18597,16332,21991,14387,239017,100044223,19046,19045,77559	318	191	13588	5.36916e+15	1.43263e+09	1.19386e+08	1.76022e+09
GOTERM_BP_FAT	GO:0046164~alcohol catabolic process	15	390625	2.22018e+06	18746,17449,68263,13808,66171,11674,100042025,18293,18655,16828,235339,18597,21991,239017,100044223	318	65	13588	9.86067e+15	2.9595e+08	2.27654e+08	3.63624e+09
SP_PIR_KEYWORDS	glycolysis	12	3125	745018	18746,16828,68263,235339,18597,21991,13808,100044223,11674,18655,18293,100042025	377	42	17854	1.35309e+16	2.54796e+09	1.59248e+07	1.01544e+10
Annotation Cluster 8	Enrichment Score: 10.65176819036603
Category	Term	Count	%	PValue	Genes	List Total	Pop Hits	Pop Total	Fold Enrichment	Bonferroni	Benjamini	FDR
GOTERM_CC_FAT	GO:0015629~actin cytoskeleton	29	7.55208e+15	71.3611	20740,20742,109711,286940,17886,21956,17901,17883,11426,17885,22138,12306,14201,68794,11472,22330,21894,12345,22388,22004,17913,12340,11475,22003,11474,16332,12385,11459,76709	301	205	12504	5.87661e+15	233437	21221.9	96644.9
SP_PIR_KEYWORDS	actin-binding	27	703125	21089.8	22323,20740,20742,21952,109711,286940,17886,21953,17883,11426,17885,102866,74117,14086,68794,11472,22330,12345,22388,22004,17913,12340,22003,71994,11474,16332,76709	377	226	17854	5.65782e+15	72127.1	801.412	2.87449e+06
GOTERM_MF_FAT	GO:0008092~cytoskeletal protein binding	39	1015625	498.289	22323,20740,20742,21952,109711,320502,286940,17886,21953,16561,11426,17883,56430,17885,12306,102866,74117,14201,14086,16573,68794,11472,22330,21894,17698,22388,12345,17913,22004,12340,22003,71994,11474,16332,12385,76709,22628,22629,23970	337	414	13288	3.71445e+15	2.43664e+06	270738	7.15314e+06
GOTERM_MF_FAT	GO:0003779~actin binding	32	8.33333e+15	8948.61	22323,20740,20742,21952,109711,286940,17886,21953,17883,11426,17885,102866,74117,14201,14086,68794,11472,22330,21894,12345,22388,17913,22004,12340,22003,71994,11474,16332,12385,76709,22628,22629	337	288	13288	4.38114e+15	4.37587e+06	437588	1.28461e+08
SP_PIR_KEYWORDS	cytoskeleton	33	859375	8.21084e+08	22323,20740,20742,13669,22793,109711,286940,11461,16561,24131,11426,11464,56430,68045,74117,12387,16573,68794,22330,21894,17698,12345,22388,22004,12340,19053,11475,22003,16332,12385,53860,11459,76709	377	583	17854	2.68065e+15	2.80771e+11	1.08004e+11	0.0011191128279963714
Annotation Cluster 9	Enrichment Score: 8.508403484883452
Category	Term	Count	%	PValue	Genes	List Total	Pop Hits	Pop Total	Fold Enrichment	Bonferroni	Benjamini	FDR
UP_SEQ_FEATURE	cross-link:Glycyl lysine isopeptide (Lys-Gly) (interchain with G-Cter in ubiquitin)	23	5.98958e+15	36256.8	320528,12469,15387,11739,14977,26440,22186,22019,16211,27050,18293,11370,245688,20014,11429,19179,54709,22003,22154,18538,22138,11938,102866	366	168	16021	5.99276e+15	5.82646e+07	5.82646e+07	6.0744e+07
SP_PIR_KEYWORDS	isopeptide bond	26	6.77083e+15	1.06948e+07	320528,11739,14977,26440,16211,11370,245688,18148,11429,54709,22154,22138,102866,12469,15387,22186,22019,18293,27050,20014,19179,22003,18538,98758,11938,14268	377	277	17854	4.44516e+15	3.65762e+09	2.03201e+08	1.45768e+10
SP_PIR_KEYWORDS	ubl conjugation	31	8.07292e+15	7.69533e+08	320528,11739,14977,15184,26440,67088,16211,11370,18803,245688,76936,18148,11429,54709,22154,22138,102866,12469,15387,12387,22186,22019,18293,27050,19179,20014,22003,12385,18538,98758,11938	377	524	17854	2.80172e+15	2.63146e+12	1.05272e+11	0.0010488505995942532
Annotation Cluster 10	Enrichment Score: 8.053753740902678
Category	Term	Count	%	PValue	Genes	List Total	Pop Hits	Pop Total	Fold Enrichment	Bonferroni	Benjamini	FDR
GOTERM_CC_FAT	GO:0005739~mitochondrion	80	2.08333e+16	57.9063	19285,18746,18747,68263,11739,22321,67863,74551,22273,18673,233870,22631,11429,18674,110842,67003,11947,227197,11949,11636,11946,15526,17449,11669,67834,66445,13382,70223,215999,68015,20916,18293,14104,66736,16828,11950,235339,229663,67273,170718,78920,67300,66945,12261,26926,15926,16561,29876,11370,110826,108037,20226,12709,11409,12034,24015,85305,12974,18597,15482,71679,11964,110308,78830,12468…	301	1322	12504	2.51386e+16	1887.82	269.673	7815.97
SP_PIR_KEYWORDS	mitochondrion	49	1.27604e+16	381335	19285,68263,11739,67863,22273,74551,18673,233870,11429,110842,18674,67003,11947,227197,11949,11946,15526,11669,66445,67834,13382,20916,68015,18293,11950,235339,67273,78920,66945,12261,26926,16561,29876,110826,11370,11409,12034,24015,18597,12974,71679,78830,269951,100047429,11740,15510,52538,74205,72542	377	790	17854	2.9374e+16	1.30417e+08	1.0032e+07	5.19751e+07
SP_PIR_KEYWORDS	transit peptide	35	9.11458e+15	1.9052e+06	68263,26926,22273,74551,11370,233870,11409,11429,18597,12974,18674,110842,67003,11947,227197,11949,11946,15526,11669,66445,67834,269951,13382,100047429,68015,20916,18293,11950,235339,15510,67273,78920,52538,66945,12261	377	457	17854	3.62699e+15	6.51578e+07	4.65413e+06	2.59674e+09
GOTERM_CC_FAT	GO:0044429~mitochondrial part	40	1.04167e+16	26883	68263,26926,11739,67863,22273,18673,110826,11370,233870,108037,11409,12034,18597,12974,110842,18674,67003,11947,227197,15482,11949,71679,11946,78830,11669,66445,269951,13382,100047429,11740,18293,11950,235339,15510,229663,67273,52538,74205,66945,12261	301	524	12504	3.17111e+15	8.79074e+07	6.2791e+06	3.63956e+09
UP_SEQ_FEATURE	transit peptide:Mitochondrion	34	8.85417e+15	3.34295e+07	68263,26926,22273,74551,11370,233870,11409,11429,18597,12974,18674,110842,67003,11947,227197,11949,11946,15526,11669,67834,66445,269951,13382,100047429,68015,20916,18293,11950,235339,15510,67273,78920,66945,12261	366	449	16021	3.31468e+15	5.37211e+09	1.07442e+10	5.60072e+09
GOTERM_CC_FAT	GO:0019866~organelle inner membrane	27	703125	3.26669e+08	11739,67863,22273,16905,18673,11370,108037,233870,12034,18674,67003,11947,227197,11949,71679,11946,78830,66445,269951,11740,100047429,11950,15510,229663,52538,18538,66945	301	312	12504	3.59494e+16	1.0682e+11	4.45086e+08	4.42261e+10
SP_PIR_KEYWORDS	mitochondrion inner membrane	19	4.94792e+15	6.51893e+07	78830,11739,66445,11740,100047429,67863,22273,18673,11370,11950,12034,18674,67003,11947,227197,11949,71679,66945,11946	377	183	17854	4.91696e+15	2.22945e+10	1.0134e+10	8.88515e+09
GOTERM_CC_FAT	GO:0005743~mitochondrial inner membrane	25	6.51042e+15	1.88719e+09	11739,67863,22273,11370,18673,108037,233870,12034,18674,67003,11947,227197,11949,71679,11946,78830,66445,269951,11740,100047429,11950,229663,15510,52538,66945	301	296	12504	3.50858e+15	6.17091e+10	2.28559e+10	2.55497e+10
GOTERM_CC_FAT	GO:0031966~mitochondrial membrane	28	7.29167e+15	2.40958e+09	26926,11739,67863,22273,18673,11370,108037,233870,12034,18674,67003,11947,227197,11949,71679,11946,78830,66445,269951,11740,100047429,18293,11950,15510,229663,52538,74205,66945	301	368	12504	3.16077e+15	7.87902e+10	2.71701e+10	3.26221e+11
GOTERM_CC_FAT	GO:0031967~organelle envelope	35	9.11458e+15	2.50022e+08	26926,11739,67863,16211,16905,22273,18673,11370,108037,233870,12034,18674,67003,11947,227197,11949,70572,71679,11946,78830,75751,66445,269951,100047429,11740,18293,17913,11950,15510,229663,52538,18538,74205,66945,114584	301	540	12504	2.69251e+16	8.17537e+10	2.72523e+09	3.38492e+11
GOTERM_CC_FAT	GO:0031975~envelope	35	9.11458e+15	2.73923e+09	26926,11739,67863,16211,16905,22273,18673,11370,108037,233870,12034,18674,67003,11947,227197,11949,70572,71679,11946,78830,75751,66445,269951,100047429,11740,18293,17913,11950,15510,229663,52538,18538,74205,66945,114584	301	542	12504	2.68257e+15	8.95688e+10	2.88944e+10	3.7085e+11
GOTERM_CC_FAT	GO:0005740~mitochondrial envelope	28	7.29167e+15	8.09327e+08	26926,11739,67863,22273,18673,11370,108037,233870,12034,18674,67003,11947,227197,11949,71679,11946,78830,66445,269951,11740,100047429,18293,11950,15510,229663,52538,74205,66945	301	391	12504	2.97484e+15	2.64615e+11	8.27028e+08	0.0010957034781378105
GOTERM_CC_FAT	GO:0031090~organelle membrane	41	1.06771e+16	9.85939e+08	26926,68938,11739,109711,103963,20190,67863,16561,16905,22273,18673,11370,108037,233870,15464,12034,18674,67003,11947,227197,11949,434246,71679,11946,78830,66445,269951,12847,100047429,11740,18293,11950,15510,229663,20014,52538,18538,74205,67300,66945,11937	301	809	12504	2.10532e+15	0.0032188447750124416	8.95526e+10	0.013347327910273599
Annotation Cluster 11	Enrichment Score: 7.405546441931928
Category	Term	Count	%	PValue	Genes	List Total	Pop Hits	Pop Total	Fold Enrichment	Bonferroni	Benjamini	FDR
GOTERM_BP_FAT	GO:0015980~energy derivation by oxidation of organic compounds	19	4.94792e+15	9857.06	78830,17449,19309,67834,13382,269951,15926,20916,22273,12974,11429,170718,78920,14387,227197,66945,19046,19045,77559	318	98	13588	8.2843e+15	1.31394e+07	1.87706e+07	1.61439e+08
GOTERM_BP_FAT	GO:0006084~acetyl-CoA metabolic process	12	3125	52367	17449,235339,12974,11429,104112,78920,170718,67834,269951,15926,66945,20916	318	31	13588	1.65405e+15	6.98052e+07	6.34593e+06	8.57671e+07
GOTERM_BP_FAT	GO:0045333~cellular respiration	14	3.64583e+16	732396	78830,17449,67834,13382,269951,15926,20916,22273,12974,11429,170718,78920,227197,66945	318	59	13588	1.01392e+16	9.76283e+08	6.97345e+07	1.19952e+10
GOTERM_BP_FAT	GO:0006099~tricarboxylic acid cycle	10	2.60417e+15	1.12088e+07	17449,12974,11429,78920,170718,67834,269951,15926,66945,20916	318	23	13588	1.85781e+15	1.49413e+09	9.96085e+07	1.83578e+10
GOTERM_BP_FAT	GO:0046356~acetyl-CoA catabolic process	10	2.60417e+15	1.75687e+07	17449,12974,11429,78920,170718,67834,269951,15926,66945,20916	318	24	13588	1.7804e+15	2.3419e+10	1.46369e+08	2.87741e+10
SP_PIR_KEYWORDS	tricarboxylic acid cycle	9	234375	2.21751e+06	17449,12974,11429,78920,67834,269951,15926,66945,20916	377	19	17854	2.24328e+16	7.58387e+08	3.79194e+08	3.02241e+09
GOTERM_BP_FAT	GO:0009060~aerobic respiration	10	2.60417e+15	5.92062e+06	17449,12974,11429,78920,170718,67834,269951,15926,66945,20916	318	27	13588	1.58258e+16	7.89216e+09	4.64246e+08	9.69685e+09
GOTERM_BP_FAT	GO:0009109~coenzyme catabolic process	10	2.60417e+15	1.21416e+08	17449,12974,11429,78920,170718,67834,269951,15926,66945,20916	318	29	13588	1.47343e+15	1.61846e+10	8.09236e+08	1.98856e+11
GOTERM_BP_FAT	GO:0051187~cofactor catabolic process	10	2.60417e+15	3.19707e+08	17449,12974,11429,78920,170718,67834,269951,15926,66945,20916	318	32	13588	1.3353e+16	4.26161e+10	2.02938e+09	5.23619e+11
GOTERM_BP_FAT	GO:0006732~coenzyme metabolic process	15	390625	6.29835e+08	17449,14870,67834,269951,15926,66171,20916,235339,12974,104112,11429,170718,78920,21991,66945	318	143	13588	4.48212e+15	0.008360582840639896	3.10905e+11	0.010314995418703177
GOTERM_BP_FAT	GO:0051186~cofactor metabolic process	15	390625	9.41615e+09	17449,14870,67834,269951,15926,66171,20916,235339,12974,104112,11429,170718,78920,21991,66945	318	182	13588	3.52167e+16	0.11796466219580282	0.0030568587089311317	0.15410688953779728
GOTERM_MF_FAT	GO:0004448~isocitrate dehydrogenase activity	4	1.04167e+16	3.02819e+11	170718,67834,269951,15926	337	6	13288	2.62868e+16	0.1376560550169713	0.005470208798773024	0.4338303687468459
GOTERM_MF_FAT	GO:0051287~NAD or NADH binding	7	1.82292e+16	7.84341e+11	17449,236539,170718,67834,269951,15926,100042025	337	44	13288	627299703264095	0.3186597170039297	0.013143665069913713	112007265718862
Annotation Cluster 12	Enrichment Score: 7.35284929174196
Category	Term	Count	%	PValue	Genes	List Total	Pop Hits	Pop Total	Fold Enrichment	Bonferroni	Benjamini	FDR
SP_PIR_KEYWORDS	Intermediate filament	17	4.42708e+15	2412.97	114566,16661,16664,100126226,53622,13346,71888,223917,16905,22352,18008,332131,77055,239673,16678,68239,110308	377	74	17854	1.08796e+16	825232	82523.2	3.2888e+06
UP_SEQ_FEATURE	region of interest:Linker 1	14	3.64583e+16	2.02875e+07	114566,16661,16664,53622,13346,71888,223917,16905,22352,18008,77055,16678,68239,110308	366	65	16021	9.42808e+15	3.2602e+10	1.6301e+10	3.39894e+10
UP_SEQ_FEATURE	region of interest:Coil 1B	14	3.64583e+16	2.02875e+07	114566,16661,16664,53622,13346,71888,223917,16905,22352,18008,77055,16678,68239,110308	366	65	16021	9.42808e+15	3.2602e+10	1.6301e+10	3.39894e+10
UP_SEQ_FEATURE	region of interest:Coil 1A	14	3.64583e+16	2.02875e+07	114566,16661,16664,53622,13346,71888,223917,16905,22352,18008,77055,16678,68239,110308	366	65	16021	9.42808e+15	3.2602e+10	1.6301e+10	3.39894e+10
UP_SEQ_FEATURE	region of interest:Rod	14	3.64583e+16	2.47494e+06	114566,16661,16664,53622,13346,71888,223917,16905,22352,18008,77055,16678,68239,110308	366	66	16021	9.28523e+15	3.97722e+09	1.32574e+10	4.14647e+09
UP_SEQ_FEATURE	region of interest:Head	14	3.64583e+16	3.00825e+07	114566,16661,16664,53622,13346,71888,223917,16905,22352,18008,77055,16678,68239,110308	366	67	16021	9.14664e+15	4.83424e+09	1.20856e+10	5.03996e+09
UP_SEQ_FEATURE	region of interest:Tail	14	3.64583e+16	5.29116e+06	114566,16661,16664,53622,13346,71888,223917,16905,22352,18008,77055,16678,68239,110308	366	70	16021	875464480874317	8.50286e+09	1.41715e+10	8.86471e+08
UP_SEQ_FEATURE	region of interest:Linker 12	13	3.38542e+16	6.97632e+06	114566,16661,16664,53622,13346,71888,223917,22352,18008,77055,16678,68239,110308	366	59	16021	9.64495e+15	1.12109e+11	1.60156e+09	1.1688e+11
GOTERM_CC_FAT	GO:0005882~intermediate filament	18	46875	2.89262e+08	114566,16661,53622,16664,100126226,13346,71888,223917,16905,22352,18008,56430,332131,77055,239673,16678,68239,110308	301	137	12504	5.45801e+15	9.45881e+09	4.11255e+09	3.91617e+11
GOTERM_CC_FAT	GO:0045111~intermediate filament cytoskeleton	18	46875	4.00942e+07	114566,16661,53622,16664,100126226,13346,71888,223917,16905,22352,18008,56430,332131,77055,239673,16678,68239,110308	301	140	12504	5.34105e+15	1.31107e+11	5.24432e+08	5.42816e+10
UP_SEQ_FEATURE	region of interest:Coil 2	12	3125	7.76422e+07	114566,16661,53622,16664,77055,71888,223917,16678,68239,110308,22352,16905	366	59	16021	8.90303e+15	1.24763e+12	1.55962e+11	1.3008e+11
GOTERM_CC_FAT	GO:0045095~keratin filament	11	2.86458e+15	2.61936e+09	114566,16661,53622,100126226,16664,332131,77055,239673,223917,16678,110308	301	64	12504	7.13995e+15	8.56166e+11	2.51918e+10	0.003546171140977883
UP_SEQ_FEATURE	site:Stutter	8	2.08333e+15	4.93493e+10	16661,16664,13346,71888,223917,16678,110308,16905	366	31	16021	1.12963e+16	0.007899085523524807	6.09848e+11	0.008267569433551003
SP_PIR_KEYWORDS	keratin	12	3125	1.89348e+11	114566,16661,53622,100126226,16664,332131,77055,71888,223917,16678,68239,110308	377	109	17854	521373469934052	0.00645485547133251	2.23278e+12	0.02580466881301202
SP_PIR_KEYWORDS	coiled coil	48	12.5	0.04175958435359367	19285,22323,13669,114566,217342,16661,94186,16664,53622,219158,17886,16561,16905,18673,12034,17883,56430,17885,332131,216197,239673,22138,434246,72946,110308,30960,16593,16573,100126226,100044332,13346,75608,30948,71888,223917,215999,68016,22352,22004,18008,242702,22003,77055,19139,16678,23970,68239,13424	377	1732	17854	1.31246e+16	0.9999995383917427	0.1930854390343768	4.40885e+16
Annotation Cluster 13	Enrichment Score: 6.818067560765551
Category	Term	Count	%	PValue	Genes	List Total	Pop Hits	Pop Total	Fold Enrichment	Bonferroni	Benjamini	FDR
SP_PIR_KEYWORDS	proteasome	13	3.38542e+16	98858.3	21762,23997,23996,26440,66997,73677,67089,19179,19182,19181,19172,22123,19184	377	54	17854	1.1401e+16	3.38095e+08	1.9888e+08	1.34742e+10
GOTERM_CC_FAT	GO:0000502~proteasome complex	13	3.38542e+16	9.71619e+06	21762,23997,23996,26440,66997,73677,67089,19179,19182,19181,19172,22123,19184	301	58	12504	9.31103e+15	3.17719e+09	1.51295e+09	1.31543e+10
COG_ONTOLOGY	Posttranslational modification, protein turnover, chaperones	11	2.86458e+15	3.65838e+11	66736,21762,56445,22225,67089,19179,23996,19182,19181,19184,67160	47	127	2040	3.75942e+15	0.0051095648092504	0.0051095648092504	0.24824689423027513
Annotation Cluster 14	Enrichment Score: 6.59446392806636
Category	Term	Count	%	PValue	Genes	List Total	Pop Hits	Pop Total	Fold Enrichment	Bonferroni	Benjamini	FDR
SP_PIR_KEYWORDS	Aminoacyl-tRNA synthetase	12	3125	3.08713e+06	27267,107045,20226,104458,22321,85305,226414,353172,70223,23874,107271,105148	377	39	17854	1.45717e+16	1.0558e+09	7.03865e+06	4.20768e+09
GOTERM_MF_FAT	GO:0004812~aminoacyl-tRNA ligase activity	13	3.38542e+16	1.7285e+06	107045,104458,22321,353172,70223,27267,20226,85305,226414,23874,107271,72946,105148	337	48	13288	1.0679e+16	8.45238e+08	5.63492e+07	2.48133e+10
GOTERM_MF_FAT	GO:0016875~ligase activity, forming carbon-oxygen bonds	13	3.38542e+16	1.7285e+06	107045,104458,22321,353172,70223,27267,20226,85305,226414,23874,107271,72946,105148	337	48	13288	1.0679e+16	8.45238e+08	5.63492e+07	2.48133e+10
GOTERM_MF_FAT	GO:0016876~ligase activity, forming aminoacyl-tRNA and related compounds	13	3.38542e+16	1.7285e+06	107045,104458,22321,353172,70223,27267,20226,85305,226414,23874,107271,72946,105148	337	48	13288	1.0679e+16	8.45238e+08	5.63492e+07	2.48133e+10
GOTERM_BP_FAT	GO:0043038~amino acid activation	12	3125	6.03697e+06	27267,107045,20226,104458,22321,85305,226414,353172,70223,23874,107271,105148	318	46	13588	1.11468e+15	8.04725e+09	4.47071e+08	9.88741e+08
GOTERM_BP_FAT	GO:0043039~tRNA aminoacylation	12	3125	6.03697e+06	27267,107045,20226,104458,22321,85305,226414,353172,70223,23874,107271,105148	318	46	13588	1.11468e+15	8.04725e+09	4.47071e+08	9.88741e+08
GOTERM_BP_FAT	GO:0006418~tRNA aminoacylation for protein translation	12	3125	6.03697e+06	27267,107045,20226,104458,22321,85305,226414,353172,70223,23874,107271,105148	318	46	13588	1.11468e+15	8.04725e+09	4.47071e+08	9.88741e+08
UP_SEQ_FEATURE	short sequence motif:"HIGH" region	6	15625	2.94862e+11	27267,107045,104458,22321,107271,105148	366	17	16021	1.54494e+16	0.04627987390959276	0.0029571826120246003	0.049389183372172685
SP_PIR_KEYWORDS	ligase	19	4.94792e+15	4.63905e+09	27053,107045,217342,237823,104458,22321,353172,70223,20916,22201,27267,51797,20226,85305,226414,74205,23874,107271,105148	377	290	17854	3.10277e+16	0.01574071901934071	5.11673e+11	0.0632106599197324
GOTERM_BP_FAT	GO:0006399~tRNA metabolic process	12	3125	6.55715e+10	27267,107045,20226,104458,22321,85305,226414,353172,70223,23874,107271,105148	318	113	13588	4.53765e+15	0.0836983950469189	0.0022976118465585227	0.10733948781447289
UP_SEQ_FEATURE	short sequence motif:"KMSKS" region	5	1.30208e+16	2.96442e+12	27267,107045,22321,107271,105148	366	15	16021	1.45911e+16	0.37901777372399337	0.024764661350697215	0.4954955619670076
GOTERM_BP_FAT	GO:0034660~ncRNA metabolic process	12	3125	0.007883284493368888	27267,107045,20226,104458,22321,85305,226414,353172,70223,23874,107271,105148	318	202	13588	2.53839e+15	0.9999738080287796	0.12355008688952351	1.21575e+16
Annotation Cluster 15	Enrichment Score: 6.3960230550528125
Category	Term	Count	%	PValue	Genes	List Total	Pop Hits	Pop Total	Fold Enrichment	Bonferroni	Benjamini	FDR
GOTERM_CC_FAT	GO:0005865~striated muscle thin filament	6	15625	1.55285e+09	22004,22003,11474,11472,11459,21956	301	7	12504	3.5607e+15	5.07769e+10	1.953e+10	2.10233e+12
GOTERM_BP_FAT	GO:0003012~muscle system process	12	3125	3.75793e+09	22004,109272,11475,22003,17885,11474,11472,14387,20190,22138,434246,21956	318	67	13588	7.65306e+15	5.00806e+11	2.27694e+10	6.15475e+11
GOTERM_BP_FAT	GO:0006936~muscle contraction	11	2.86458e+15	1.11136e+09	22004,109272,11475,22003,17885,11474,11472,14387,20190,22138,21956	318	60	13588	7.83375e+15	0.001480341703939958	6.44083e+10	0.0018201732318701147
Annotation Cluster 16	Enrichment Score: 4.8593941288357385
Category	Term	Count	%	PValue	Genes	List Total	Pop Hits	Pop Total	Fold Enrichment	Bonferroni	Benjamini	FDR
SP_PIR_KEYWORDS	Initiation factor	11	2.86458e+15	1.91594e+09	27979,26908,75705,13669,56347,68135,54709,100044332,13665,13681,208643	377	55	17854	947161803713528	6.55229e+10	2.84891e+10	2.61137e+12
GOTERM_MF_FAT	GO:0003743~translation initiation factor activity	11	2.86458e+15	3.12617e+10	27979,26908,75705,13669,56347,68135,54709,100044332,13665,13681,208643	337	62	13288	6.99569e+15	0.0015275330085106065	8.04547e+10	0.0044876425030704326
GOTERM_CC_FAT	GO:0005852~eukaryotic translation initiation factor 3 complex	6	15625	5.30383e+09	27979,13669,56347,68135,54709,100044332	301	12	12504	2.07708e+16	0.0017328524890997121	4.95518e+10	0.007180355337887967
GOTERM_BP_FAT	GO:0006413~translational initiation	5	1.30208e+16	0.011493180890581066	27979,13669,56347,68135,54709	318	38	13588	5.62231e+15	0.9999997968112917	0.1573575603806473	1.72484e+15
Annotation Cluster 17	Enrichment Score: 4.355557846934775
Category	Term	Count	%	PValue	Genes	List Total	Pop Hits	Pop Total	Fold Enrichment	Bonferroni	Benjamini	FDR
GOTERM_MF_FAT	GO:0048037~cofactor binding	22	5.72917e+15	2.86468e+08	26926,11657,17449,19309,67834,13382,269951,15926,14104,100042025,18293,11370,216136,108037,236539,235339,11409,170718,78920,110842,239017,66945	337	226	13288	3.83834e+16	1.40073e+11	8.75514e+09	4.11234e+11
GOTERM_MF_FAT	GO:0050662~coenzyme binding	18	46875	6.10924e+08	26926,17449,67834,13382,269951,15926,100042025,18293,11370,216136,236539,235339,11409,170718,78920,110842,239017,66945	337	160	13288	4.43591e+15	2.98697e+12	1.65966e+10	8.77001e+11
GOTERM_BP_FAT	GO:0055114~oxidation reduction	29	7.55208e+15	0.002138324267531428	68263,26926,15926,22273,110826,11370,11409,18597,110842,67003,227197,78830,18451,17449,11669,53382,18477,67834,66445,269951,13382,14104,18293,100042025,16828,236539,67273,170718,66945	318	672	13588	1.84398e+16	0.9423542136443729	0.041694471646725684	3.44517e+16
SP_PIR_KEYWORDS	oxidoreductase	22	5.72917e+15	0.010107219638448801	18451,68263,26926,17449,11669,18477,67834,13382,269951,15926,14104,100042025,18293,11370,16828,236539,11409,18597,170718,67003,227197,66945	377	572	17854	1.82147e+16	0.9690151337519577	0.05913147383292139	1.29302e+16
Annotation Cluster 18	Enrichment Score: 3.5951862975436675
Category	Term	Count	%	PValue	Genes	List Total	Pop Hits	Pop Total	Fold Enrichment	Bonferroni	Benjamini	FDR
GOTERM_CC_FAT	GO:0001725~stress fiber	6	15625	1.81358e+12	14201,109711,286940,17886,11459,12306	301	23	12504	1.08369e+15	0.05758504931133479	0.001378342275947686	0.24525353739237588
GOTERM_CC_FAT	GO:0032432~actin filament bundle	6	15625	2.24621e+12	14201,109711,286940,17886,11459,12306	301	24	12504	1.03854e+16	0.07082617789894785	0.0016311005515616817	0.30367622813988193
GOTERM_CC_FAT	GO:0042641~actomyosin	6	15625	4.02209e+11	14201,109711,286940,17886,11459,12306	301	27	12504	9.23145e+15	0.12326359213000004	0.0026810707772999542	0.543160825286948
Annotation Cluster 19	Enrichment Score: 3.4296461797212037
Category	Term	Count	%	PValue	Genes	List Total	Pop Hits	Pop Total	Fold Enrichment	Bonferroni	Benjamini	FDR
SP_PIR_KEYWORDS	elongation factor	7	1.82292e+16	1.70614e+11	233870,21399,13627,13629,66656,55949,67160	377	27	17854	1.2278e+16	0.005818068517139285	2.08373e+12	0.023251830876103163
GOTERM_MF_FAT	GO:0003746~translation elongation factor activity	7	1.82292e+16	1.0783e+12	233870,21399,13627,13629,66656,55949,67160	337	31	13288	890360869149038	0.05136566465841841	0.0021947492741745123	0.15468298789523827
GOTERM_BP_FAT	GO:0006414~translational elongation	6	15625	0.0031165785896298676	11837,233870,13627,66656,55949,67160	318	43	13588	5.96226e+15	0.9844062720184232	0.05615195044804355	498384961193532
GOTERM_CC_FAT	GO:0005853~eukaryotic translation elongation factor 1 complex	3	0.78125	0.0033341169249355494	66656,55949,67160	301	4	12504	3.11561e+16	0.6644813734554122	0.017185189096106335	4.42075e+15
Annotation Cluster 20	Enrichment Score: 3.3721628943629556
Category	Term	Count	%	PValue	Genes	List Total	Pop Hits	Pop Total	Fold Enrichment	Bonferroni	Benjamini	FDR
GOTERM_BP_FAT	GO:0046907~intracellular transport	27	703125	9.49467e+09	20742,68938,17886,16211,16561,108124,22631,18148,22630,11426,70572,269523,15526,78830,75751,16593,54401,16573,56440,12847,30930,18538,75471,22627,67300,22628,22629	318	431	13588	2.67679e+16	0.012576695084187683	4.36334e+11	0.015549313881546567
GOTERM_BP_FAT	GO:0034613~cellular protein localization	21	546875	2.43494e+10	75751,68938,20742,54401,12387,56440,12847,16211,108124,22631,22630,11426,18538,22627,75471,67300,70572,22628,22629,269523,15526	318	299	13588	3.00107e+15	0.031937092539530365	0.0010138047140066941	0.03987227146999839
GOTERM_BP_FAT	GO:0006886~intracellular protein transport	20	5.20833e+15	2.6209e+10	75751,68938,20742,54401,56440,12847,16211,108124,22631,22630,11426,18538,22627,75471,67300,70572,22628,22629,269523,15526	318	276	13588	3.09634e+15	0.034333865287574095	0.0010270346135204944	0.04291676247871745
GOTERM_BP_FAT	GO:0070727~cellular macromolecule localization	21	546875	2.67758e+10	75751,68938,20742,54401,12387,56440,12847,16211,108124,22631,22630,11426,18538,22627,75471,67300,70572,22628,22629,269523,15526	318	301	13588	2.98113e+15	0.035063178617598334	0.0010192701867947074	0.04384465101875401
GOTERM_BP_FAT	GO:0008104~protein localization	33	859375	7.57273e+11	320528,20742,68938,17886,14569,16211,108124,22631,170625,18148,22630,11426,70572,269523,15526,75751,54401,12387,75608,56440,21894,12847,30930,271564,17913,76983,14694,18538,75471,22627,67300,22628,22629	318	753	13588	1.87261e+16	0.6357183158438368	0.01726013246620728	1.23307e+16
GOTERM_BP_FAT	GO:0006605~protein targeting	11	2.86458e+15	0.0011118558609418245	75751,20742,22631,11426,22630,54401,22627,70572,22628,16211,15526	318	133	13588	3.53402e+16	0.77302795453505	0.024017186570338467	1.80552e+15
GOTERM_BP_FAT	GO:0015031~protein transport	28	7.29167e+15	0.002747826723072987	20742,68938,17886,14569,16211,108124,22631,170625,22630,11426,70572,269523,15526,75751,54401,75608,56440,12847,30930,271564,17913,76983,18538,75471,22627,67300,22628,22629	318	651	13588	1.83783e+16	0.9744698380047425	0.0517697194363973	440657010015475
GOTERM_BP_FAT	GO:0045184~establishment of protein localization	28	7.29167e+15	0.0030783039462885043	20742,68938,17886,14569,16211,108124,22631,170625,22630,11426,70572,269523,15526,75751,54401,75608,56440,12847,30930,271564,17913,76983,18538,75471,22627,67300,22628,22629	318	656	13588	1.82382e+15	0.9835874316635247	0.05623983679370981	4.92408e+15
SP_PIR_KEYWORDS	protein transport	12	3125	0.3870517148791161	17913,75751,170625,76983,75608,56440,70572,12847,30930,16211,271564,108124	377	461	17854	1.23275e+15	1.0	0.8283175890108139	9.98733e+15
Annotation Cluster 21	Enrichment Score: 2.910733570593299
Category	Term	Count	%	PValue	Genes	List Total	Pop Hits	Pop Total	Fold Enrichment	Bonferroni	Benjamini	FDR
GOTERM_BP_FAT	GO:0009259~ribonucleotide metabolic process	15	390625	1.26558e+10	237823,100047429,100046995,11950,11947,227197,11949,19139,71679,11636,11938,11928,11946,11937,11964	318	125	13588	5.12755e+15	0.0016856009927572746	7.02902e+10	0.002072762816773821
GOTERM_BP_FAT	GO:0009150~purine ribonucleotide metabolic process	14	3.64583e+16	4.02593e+09	237823,100047429,100046995,11950,11947,227197,11949,71679,11636,11938,11946,11937,11928,11964	318	119	13588	5.02701e+15	0.0053522003501762505	2.1464e+11	0.0065934984855076095
GOTERM_BP_FAT	GO:0006119~oxidative phosphorylation	10	2.60417e+15	5.27806e+09	11950,11947,227197,13382,11949,71679,100047429,11946,22273,11964	318	56	13588	7.63028e+16	0.007010980691999902	2.70566e+11	0.008644102980348567
GOTERM_BP_FAT	GO:0046034~ATP metabolic process	12	3125	7.55078e+09	11950,11947,227197,11949,71679,100047429,11636,11938,11937,11928,11946,11964	318	90	13588	569727463312369	0.010014749436190185	3.59408e+11	0.01236602413063892
GOTERM_BP_FAT	GO:0009260~ribonucleotide biosynthetic process	13	3.38542e+16	1.05552e+10	237823,100047429,100046995,11950,11947,11949,19139,71679,11938,11946,11937,11928,11964	318	111	13588	5.00436e+15	0.013971625320380654	4.68895e+11	0.01728598588465191
GOTERM_BP_FAT	GO:0009205~purine ribonucleoside triphosphate metabolic process	12	3125	2.29722e+10	11950,11947,227197,11949,71679,100047429,11636,11938,11937,11928,11946,11964	318	101	13588	5.07678e+15	0.030158149639884835	9.87327e+11	0.03761738620474686
GOTERM_BP_FAT	GO:0009199~ribonucleoside triphosphate metabolic process	12	3125	2.52219e+11	11950,11947,227197,11949,71679,100047429,11636,11938,11937,11928,11946,11964	318	102	13588	5.02701e+15	0.03306236297197063	0.0010183077418007835	0.04130071346898356
GOTERM_MF_FAT	GO:0019829~cation-transporting ATPase activity	7	1.82292e+16	2.94788e+11	11947,11949,100047429,11938,11937,11946,11964	337	25	13288	1.10405e+15	0.014311961300989107	6.55029e+11	0.04230963145329669
GOTERM_BP_FAT	GO:0009144~purine nucleoside triphosphate metabolic process	12	3125	3.6233e+10	11950,11947,227197,11949,71679,100047429,11636,11938,11937,11928,11946,11964	318	106	13588	4.83731e+15	0.047151621625594164	0.0013407528111399891	0.05932622497357709
GOTERM_BP_FAT	GO:0009152~purine ribonucleotide biosynthetic process	12	3125	3.95586e+10	100046995,11950,237823,11947,11949,71679,100047429,11938,11937,11928,11946,11964	318	107	13588	4.7921e+15	0.05136637718826764	0.0014241908627223854	0.06476967671307232
GOTERM_CC_FAT	GO:0045259~proton-transporting ATP synthase complex	6	15625	6.78103e+10	11950,11947,11949,71679,100047429,11946	301	19	12504	1.31184e+16	0.021930672000705198	5.68421e+10	0.0917660961649025
GOTERM_BP_FAT	GO:0009141~nucleoside triphosphate metabolic process	12	3125	7.70039e+10	11950,11947,227197,11949,71679,100047429,11636,11938,11937,11928,11946,11964	318	115	13588	4.45874e+15	0.09755738081717547	0.0025629642506913575	0.12604304420946733
GOTERM_BP_FAT	GO:0006163~purine nucleotide metabolic process	14	3.64583e+16	9.61257e+10	237823,100047429,100046995,11950,11947,227197,11949,71679,11636,11938,11946,11937,11928,11964	318	160	13588	3.73884e+15	0.12027124924890564	0.0030463422829640763	0.15731913416545673
GOTERM_MF_FAT	GO:0046933~hydrogen ion transporting ATP synthase activity, rotational mechanism	5	1.30208e+16	1.15132e+12	11947,11949,100047429,11946,11964	337	11	13288	1.79228e+16	0.054747035312197156	0.002249573899901436	0.16514895884650604
GOTERM_BP_FAT	GO:0006754~ATP biosynthetic process	10	2.60417e+15	1.20067e+12	11950,11947,11949,71679,100047429,11938,11937,11928,11946,11964	318	82	13588	5.21092e+15	0.1479064634611349	0.0037153825322469025	0.19646541475054624
GOTERM_BP_FAT	GO:0015986~ATP synthesis coupled proton transport	7	1.82292e+16	1.94197e+12	11950,11947,11949,71679,100047429,11946,11964	318	37	13588	8.08397e+15	0.22809174701643053	0.00573658436300295	0.3175828808421488
GOTERM_BP_FAT	GO:0015985~energy coupled proton transport, down electrochemical gradient	7	1.82292e+16	1.94197e+12	11950,11947,11949,71679,100047429,11946,11964	318	37	13588	8.08397e+15	0.22809174701643053	0.00573658436300295	0.3175828808421488
GOTERM_BP_FAT	GO:0009165~nucleotide biosynthetic process	14	3.64583e+16	2.22809e+12	237823,100047429,100046995,51797,11950,11947,11949,19139,71679,11938,11946,11937,11928,11964	318	174	13588	3.43801e+15	0.2569840023713257	0.006436537551939514	0.3642942957002071
GOTERM_CC_FAT	GO:0045261~proton-transporting ATP synthase complex, catalytic core F(1)	4	1.04167e+16	2.59178e+12	11947,11949,100047429,11946	301	6	12504	2.76944e+15	0.08126928621563712	0.0018018262579689859	0.35031915353688214
GOTERM_BP_FAT	GO:0034654~nucleobase, nucleoside, nucleotide and nucleic acid biosynthetic process	14	3.64583e+16	294090308629	237823,100047429,100046995,51797,11950,11947,11949,19139,71679,11938,11946,11937,11928,11964	318	179	13588	3.34198e+15	0.32434996567725827	0.007969705568784513	0.4805760559460137
GOTERM_BP_FAT	GO:0034404~nucleobase, nucleoside and nucleotide biosynthetic process	14	3.64583e+16	294090308629	237823,100047429,100046995,51797,11950,11947,11949,19139,71679,11938,11946,11937,11928,11964	318	179	13588	3.34198e+15	0.32434996567725827	0.007969705568784513	0.4805760559460137
GOTERM_BP_FAT	GO:0009201~ribonucleoside triphosphate biosynthetic process	10	2.60417e+15	3.15066e+11	11950,11947,11949,71679,100047429,11938,11937,11928,11946,11964	318	93	13588	4.59458e+15	0.34298580702055514	0.008365803429254082	0.5147702879796157
GOTERM_BP_FAT	GO:0009206~purine ribonucleoside triphosphate biosynthetic process	10	2.60417e+15	3.15066e+11	11950,11947,11949,71679,100047429,11938,11937,11928,11946,11964	318	93	13588	4.59458e+15	0.34298580702055514	0.008365803429254082	0.5147702879796157
SP_PIR_KEYWORDS	Hydrogen ion transport	7	1.82292e+16	3.41116e+12	11950,11947,11949,71679,100047429,11946,11964	377	45	17854	7.36681e+15	0.11013150117743353	0.003235908163428336	0.4639330414268339
GOTERM_BP_FAT	GO:0009145~purine nucleoside triphosphate biosynthetic process	10	2.60417e+15	3.41419e+12	11950,11947,11949,71679,100047429,11938,11937,11928,11946,11964	318	94	13588	4.5457e+15	0.3656723306399239	0.008885574713740296	0.5577139732374281
GOTERM_BP_FAT	GO:0006164~purine nucleotide biosynthetic process	12	3125	3.64057e+11	100046995,11950,237823,11947,11949,71679,100047429,11938,11937,11928,11946,11964	318	137	13588	3.74274e+15	0.3845345553467491	0.009290734943262047	0.5945897667061772
GOTERM_BP_FAT	GO:0009142~nucleoside triphosphate biosynthetic process	10	2.60417e+15	3.69566e+11	11950,11947,11949,71679,100047429,11938,11937,11928,11946,11964	318	95	13588	4.49785e+15	0.3890393833142466	0.00925357590408915	0.6035618286181821
GOTERM_BP_FAT	GO:0034220~ion transmembrane transport	7	1.82292e+16	3.9735e+11	11950,11947,11949,71679,100047429,11946,11964	318	42	13588	7.12159e+15	0.4112615513333967	0.00976264871286503	0.6487993503452194
GOTERM_MF_FAT	GO:0046961~proton-transporting ATPase activity, rotational mechanism	5	1.30208e+16	4.39512e+11	11947,11949,100047429,11946,11964	337	15	13288	1.31434e+16	0.1934333112049761	0.007648057049898904	0.6290875118517003
GOTERM_CC_FAT	GO:0016469~proton-transporting two-sector ATPase complex	7	1.82292e+16	4.59821e+12	11950,11947,11949,71679,100047429,11946,11964	301	42	12504	6.92359e+15	0.13963294093400647	0.0030034040893922587	0.6207385728055792
GOTERM_CC_FAT	GO:0033178~proton-transporting two-sector ATPase complex, catalytic domain	5	1.30208e+16	6.03762e+11	11947,11949,100047429,11946,11964	301	17	12504	1.22181e+16	0.17921139559347887	0.0037192867869108026	0.8143170099838559
GOTERM_BP_FAT	GO:0044271~nitrogen compound biosynthetic process	18	46875	7.45583e+11	27053,237823,232087,100047429,51797,100046995,236539,11950,11947,11949,19139,71679,15519,11938,11928,11946,11937,11964	318	302	13588	254679495189304	0.6299928827078274	0.0172914418804887	1.21415e+15
GOTERM_BP_FAT	GO:0015992~proton transport	7	1.82292e+16	0.0012687874838200274	11950,11947,11949,71679,100047429,11946,11964	318	52	13588	5.75206e+15	0.815916822245746	0.02692707514118753	2.05788e+16
SP_PIR_KEYWORDS	atp synthesis	4	1.04167e+16	0.0013482185229880094	11947,11949,100047429,11946	377	11	17854	1.72211e+16	0.36960069319680955	0.010431614792347887	1.82203e+16
GOTERM_BP_FAT	GO:0006818~hydrogen transport	7	1.82292e+16	0.00140318641267614	11950,11947,11949,71679,100047429,11946,11964	318	53	13588	5.64353e+15	0.846147512690283	0.029273474252501486	2.27352e+16
GOTERM_MF_FAT	GO:0022890~inorganic cation transmembrane transporter activity	11	2.86458e+15	0.0014291193627924634	11950,11947,11949,22042,71679,100047429,11938,11937,11928,11946,11964	337	127	13288	3.41522e+16	0.503086447734431	0.021617274099528294	2.03209e+16
GOTERM_MF_FAT	GO:0042625~ATPase activity, coupled to transmembrane movement of ions	8	2.08333e+15	0.0017465718462317704	11947,11949,100047429,11938,11937,11928,11946,11964	337	69	13288	4.57163e+15	0.5746404011549557	0.025571025814963066	2.47824e+15
SP_PIR_KEYWORDS	cf(1)	3	0.78125	0.004241105491272899	11947,11949,11946	377	5	17854	2.84149e+16	0.7662592245909282	0.029228472229710034	5.62823e+15
GOTERM_MF_FAT	GO:0015077~monovalent inorganic cation transmembrane transporter activity	8	2.08333e+15	0.006437555764145159	11950,11947,11949,71679,100047429,11928,11946,11964	337	87	13288	3.62577e+15	0.9574953188834749	0.08398829930030849	8.85442e+15
GOTERM_MF_FAT	GO:0043492~ATPase activity, coupled to movement of substances	8	2.08333e+15	0.011442824772729305	11947,11949,100047429,11938,11937,11928,11946,11964	337	97	13288	3.25198e+16	0.9964035284962409	0.1312458032299425	1.52287e+16
GOTERM_MF_FAT	GO:0042626~ATPase activity, coupled to transmembrane movement of substances	8	2.08333e+15	0.011442824772729305	11947,11949,100047429,11938,11937,11928,11946,11964	337	97	13288	3.25198e+16	0.9964035284962409	0.1312458032299425	1.52287e+16
GOTERM_MF_FAT	GO:0016820~hydrolase activity, acting on acid anhydrides, catalyzing transmembrane movement of substances	8	2.08333e+15	0.011442824772729305	11947,11949,100047429,11938,11937,11928,11946,11964	337	97	13288	3.25198e+16	0.9964035284962409	0.1312458032299425	1.52287e+16
GOTERM_MF_FAT	GO:0016887~ATPase activity	15	390625	0.012416886289780906	17886,100047429,16561,110957,24015,15481,11947,11949,13681,11938,11928,11946,11937,11964,13424	337	281	13288	2.10482e+16	0.9977791586389279	0.1384491494040616	1.64199e+16
GOTERM_MF_FAT	GO:0015078~hydrogen ion transmembrane transporter activity	7	1.82292e+16	0.017534185893633657	11950,11947,11949,71679,100047429,11946,11964	337	82	13288	3.366e+15	0.9998249218804579	0.18222599860971	2.24264e+16
GOTERM_MF_FAT	GO:0015405~P-P-bond-hydrolysis-driven transmembrane transporter activity	8	2.08333e+15	0.018798334199665756	11947,11949,100047429,11938,11937,11928,11946,11964	337	107	13288	2.94806e+16	0.9999067181015321	0.18634566673831465	2.3847e+15
GOTERM_MF_FAT	GO:0015399~primary active transmembrane transporter activity	8	2.08333e+15	0.01968148890353601	11947,11949,100047429,11938,11937,11928,11946,11964	337	108	13288	2.92076e+16	0.9999399431631247	0.1904762055084097	2.48251e+16
GOTERM_MF_FAT	GO:0042623~ATPase activity, coupled	12	3125	0.02657777159832072	110957,15481,11947,17886,11949,100047429,13681,11938,11937,11928,11946,11964	337	223	13288	2.12181e+16	0.9999980975389077	0.2316018409894216	3.20702e+16
UP_SEQ_FEATURE	active site:4-aspartylphosphate intermediate	3	0.78125	0.17286493699042285	11938,11937,11928	366	33	16021	3.97938e+16	1.0	0.9828628866552207	9.584e+15
GOTERM_MF_FAT	GO:0015662~ATPase activity, coupled to transmembrane movement of ions, phosphorylative mechanism	4	1.04167e+16	0.17447093674231645	11947,11938,11937,11928	337	57	13288	2.76704e+15	1.0	0.7584191300748178	9.36223e+15
GOTERM_BP_FAT	GO:0055085~transmembrane transport	15	390625	0.18871445376113447	78830,11739,20539,14977,11740,100047429,67863,17913,11950,18674,11947,11949,71679,11946,11964	318	460	13588	1.39336e+15	1.0	0.8383098295109904	9.67458e+15
SP_PIR_KEYWORDS	ion transport	14	3.64583e+16	0.35497975792083486	14977,20190,100047429,29876,11950,11947,11949,71679,11938,11946,11937,11928,114584,11964	377	543	17854	1.22102e+15	1.0	0.8006017560662011	9.97462e+15
GOTERM_BP_FAT	GO:0006812~cation transport	14	3.64583e+16	0.42249259672298234	14228,11749,14977,20190,100047429,11950,11947,11949,71679,11938,11946,11937,11928,11964	318	515	13588	1.16158e+16	1.0	0.9836182309702911	999875614811619
GOTERM_BP_FAT	GO:0006811~ion transport	18	46875	0.49585367864988245	78830,14228,11749,11739,14977,20190,100047429,29876,11950,11947,11949,71679,11938,11946,11937,11928,114584,11964	318	712	13588	1.08024e+15	1.0	0.9920171407480044	9.99987e+15
GOTERM_BP_FAT	GO:0015672~monovalent inorganic cation transport	8	2.08333e+15	0.564116336570352	11950,11947,11949,71679,100047429,11928,11946,11964	318	303	13588	1.12817e+16	1.0	0.9959415221331314	9.99999e+15
GOTERM_BP_FAT	GO:0016310~phosphorylation	17	4.42708e+15	0.6119882997122672	18747,20742,13665,21849,13382,100047429,22273,105787,18655,11950,11947,22138,227197,11949,71679,11946,11964	318	718	13588	1.0117e+16	1.0	0.9974012479438605	1e+16
GOTERM_BP_FAT	GO:0006793~phosphorus metabolic process	20	5.20833e+15	0.6437455821851202	18747,20742,13665,21849,13382,100047429,22273,105787,18655,67895,11950,11947,227197,22138,11949,71679,19046,19045,11946,11964	318	866	13588	0.9868258602408239	1.0	0.9980213730831209	1e+16
GOTERM_BP_FAT	GO:0006796~phosphate metabolic process	20	5.20833e+15	0.6437455821851202	18747,20742,13665,21849,13382,100047429,22273,105787,18655,67895,11950,11947,227197,22138,11949,71679,19046,19045,11946,11964	318	866	13588	0.9868258602408239	1.0	0.9980213730831209	1e+16
Annotation Cluster 22	Enrichment Score: 2.9034180464427903
Category	Term	Count	%	PValue	Genes	List Total	Pop Hits	Pop Total	Fold Enrichment	Bonferroni	Benjamini	FDR
UP_SEQ_FEATURE	short sequence motif:Prevents secretion from ER	11	2.86458e+15	7.75111e+08	12321,19672,22027,18453,12304,12406,14828,14827,19089,320011,71853	366	59	16021	8.16111e+15	0.0012448290066100487	1.03795e+12	0.0012985999523262848
SP_PIR_KEYWORDS	Redox-active center	7	1.82292e+16	1.51951e+12	18453,12304,53382,18477,14827,13382,71853	377	39	17854	8.50017e+15	0.050643793867524045	0.001527397100797967	0.2069071258663624
GOTERM_BP_FAT	GO:0045454~cell redox homeostasis	8	2.08333e+15	5.76245e+11	26926,18453,12304,53382,18477,14827,13382,71853	318	62	13588	551349158044228	0.5362247979785271	0.013872967798263192	0.9396081788341504
UP_SEQ_FEATURE	domain:Thioredoxin 1	4	1.04167e+16	6.03202e+11	18453,12304,14827,71853	366	8	16021	2.18866e+16	0.6207797709699419	0.04311729655467156	1.00581e+16
UP_SEQ_FEATURE	domain:Thioredoxin 2	4	1.04167e+16	6.03202e+11	18453,12304,14827,71853	366	8	16021	2.18866e+16	0.6207797709699419	0.04311729655467156	1.00581e+16
GOTERM_MF_FAT	GO:0016864~intramolecular oxidoreductase activity, transposing S-S bonds	4	1.04167e+16	8.16448e+10	18453,12304,14827,71853	337	8	13288	1.97151e+15	0.32928179519669076	0.013225306603811493	1.16567e+16
GOTERM_MF_FAT	GO:0003756~protein disulfide isomerase activity	4	1.04167e+16	8.16448e+10	18453,12304,14827,71853	337	8	13288	1.97151e+15	0.32928179519669076	0.013225306603811493	1.16567e+16
GOTERM_MF_FAT	GO:0016862~intramolecular oxidoreductase activity, interconverting keto- and enol-groups	4	1.04167e+16	0.0012017905355440298	18453,12304,14827,71853	337	9	13288	1.75246e+16	0.4445790512630512	0.018789903779915518	1.71144e+15
GOTERM_MF_FAT	GO:0016860~intramolecular oxidoreductase activity	5	1.30208e+16	0.015065484287440058	18453,12304,21991,14827,71853	337	38	13288	5.18819e+15	0.999402693053366	0.16200235300558008	1.95807e+16
SP_PIR_KEYWORDS	Isomerase	7	1.82292e+16	0.0387375607340899	14583,14228,18453,12304,21991,14827,71853	377	118	17854	2.80938e+15	0.9999986449518841	0.18768891408109933	4.16367e+15
UP_SEQ_FEATURE	disulfide bond	19	4.94792e+15	0.9999999997151101	22027,11657,18453,53382,18477,14827,13382,11287,12304,16971,12462,14387,22138,22042,434246,71853,11937,114584,14268	366	2379	16021	0.349596997406726	1.0	1.0	100.0
Annotation Cluster 23	Enrichment Score: 2.8962810541147115
Category	Term	Count	%	PValue	Genes	List Total	Pop Hits	Pop Total	Fold Enrichment	Bonferroni	Benjamini	FDR
UP_SEQ_FEATURE	domain:KH 2	5	1.30208e+16	9.61546e+11	15387,110611,23983,18521,14359	366	20	16021	1.09433e+16	0.7868900454419352	0.06238368499532754	1.59881e+16
UP_SEQ_FEATURE	domain:KH 1	5	1.30208e+16	9.61546e+11	15387,110611,23983,18521,14359	366	20	16021	1.09433e+16	0.7868900454419352	0.06238368499532754	1.59881e+16
UP_SEQ_FEATURE	domain:KH 3	4	1.04167e+16	0.0022142014720631493	15387,110611,23983,18521	366	12	16021	1.45911e+16	0.9716227326613659	0.128035371233582	3.64563e+16
Annotation Cluster 24	Enrichment Score: 2.5550593340573555
Category	Term	Count	%	PValue	Genes	List Total	Pop Hits	Pop Total	Fold Enrichment	Bonferroni	Benjamini	FDR
UP_SEQ_FEATURE	domain:CH 1	8	2.08333e+15	2.65619e+09	20742,11426,68794,109711,11474,11472,286940,102866	366	21	16021	1.66755e+15	4.26758e+11	4.2684e+10	4.45012e+11
UP_SEQ_FEATURE	domain:CH 2	8	2.08333e+15	2.65619e+09	20742,11426,68794,109711,11474,11472,286940,102866	366	21	16021	1.66755e+15	4.26758e+11	4.2684e+10	4.45012e+11
UP_SEQ_FEATURE	domain:Actin-binding	7	1.82292e+16	3.454e+08	20742,11426,68794,109711,11474,11472,286940	366	14	16021	2.18866e+16	5.54904e+10	5.04585e+10	5.78675e+11
UP_SEQ_FEATURE	repeat:Spectrin 4	6	15625	1.00935e+10	20740,20742,11426,109711,11474,11472	366	14	16021	1.876e+16	0.01608956791221361	0.0011579298222866852	0.01690920419024078
UP_SEQ_FEATURE	repeat:Spectrin 3	6	15625	2.12089e+11	20740,20742,11426,109711,11474,11472	366	16	16021	1.6415e+16	0.033508711564345095	0.002269620101351233	0.035527007757474305
UP_SEQ_FEATURE	repeat:Spectrin 2	6	15625	4.00669e+10	20740,20742,11426,109711,11474,11472	366	18	16021	1.45911e+16	0.062359670548378765	0.0037804154390647104	0.06710624585378744
UP_SEQ_FEATURE	repeat:Spectrin 1	6	15625	4.00669e+10	20740,20742,11426,109711,11474,11472	366	18	16021	1.45911e+16	0.062359670548378765	0.0037804154390647104	0.06710624585378744
UP_SEQ_FEATURE	domain:EF-hand 2	11	2.86458e+15	0.003698107015846869	78830,20740,12321,19672,17901,11426,109711,11474,11472,19089,102866	366	160	16021	3.00941e+16	0.9974042344694074	0.18000944749353642	6.0185e+15
UP_SEQ_FEATURE	domain:EF-hand 1	11	2.86458e+15	0.003865473020187516	78830,20740,12321,19672,17901,11426,109711,11474,11472,19089,102866	366	161	16021	2.99072e+16	0.9980184025647482	0.18189895124090016	6.28266e+15
UP_SEQ_FEATURE	repeat:Spectrin 8	3	0.78125	0.010077007171904923	20740,20742,11426	366	7	16021	1.876e+16	0.9999999145978968	0.37188095887257744	156069215995723
UP_SEQ_FEATURE	repeat:Spectrin 9	3	0.78125	0.010077007171904923	20740,20742,11426	366	7	16021	1.876e+16	0.9999999145978968	0.37188095887257744	156069215995723
UP_SEQ_FEATURE	repeat:Spectrin 17	3	0.78125	0.010077007171904923	20740,20742,11426	366	7	16021	1.876e+16	0.9999999145978968	0.37188095887257744	156069215995723
UP_SEQ_FEATURE	repeat:Spectrin 16	3	0.78125	0.010077007171904923	20740,20742,11426	366	7	16021	1.876e+16	0.9999999145978968	0.37188095887257744	156069215995723
UP_SEQ_FEATURE	repeat:Spectrin 7	3	0.78125	0.010077007171904923	20740,20742,11426	366	7	16021	1.876e+16	0.9999999145978968	0.37188095887257744	156069215995723
UP_SEQ_FEATURE	repeat:Spectrin 11	3	0.78125	0.010077007171904923	20740,20742,11426	366	7	16021	1.876e+16	0.9999999145978968	0.37188095887257744	156069215995723
UP_SEQ_FEATURE	repeat:Spectrin 10	3	0.78125	0.010077007171904923	20740,20742,11426	366	7	16021	1.876e+16	0.9999999145978968	0.37188095887257744	156069215995723
UP_SEQ_FEATURE	repeat:Spectrin 15	3	0.78125	0.010077007171904923	20740,20742,11426	366	7	16021	1.876e+16	0.9999999145978968	0.37188095887257744	156069215995723
UP_SEQ_FEATURE	repeat:Spectrin 14	3	0.78125	0.010077007171904923	20740,20742,11426	366	7	16021	1.876e+16	0.9999999145978968	0.37188095887257744	156069215995723
UP_SEQ_FEATURE	repeat:Spectrin 13	3	0.78125	0.010077007171904923	20740,20742,11426	366	7	16021	1.876e+16	0.9999999145978968	0.37188095887257744	156069215995723
UP_SEQ_FEATURE	repeat:Spectrin 12	3	0.78125	0.010077007171904923	20740,20742,11426	366	7	16021	1.876e+16	0.9999999145978968	0.37188095887257744	156069215995723
UP_SEQ_FEATURE	repeat:Spectrin 6	3	0.78125	0.0132349422133808	20740,20742,11426	366	8	16021	1.6415e+16	0.9999999994970601	0.42246629410172554	2.00058e+16
UP_SEQ_FEATURE	repeat:Spectrin 5	3	0.78125	0.01676219656248903	20740,20742,11426	366	9	16021	1.45911e+16	0.9999999999984066	0.4762755797101583	2.46639e+15
UP_SEQ_FEATURE	calcium-binding region:1	8	2.08333e+15	0.019978665761287463	78830,20740,12321,19672,11426,109711,19089,102866	366	120	16021	2.91821e+15	0.9999999999999918	0.4984321187493739	2.86882e+16
SP_PIR_KEYWORDS	calcium	22	5.72917e+15	0.09610833048090656	78830,20740,22027,98878,11749,109711,11472,19089,12321,22070,18803,19672,16971,11426,107513,11474,22138,12306,106393,11938,11937,102866	377	731	17854	1.42528e+16	0.999999999999999	0.35792283992650287	7.47724e+15
UP_SEQ_FEATURE	calcium-binding region:2	6	15625	0.10661725781354797	78830,20740,12321,11426,109711,102866	366	110	16021	2.38763e+15	1.0	0.9276111228603691	8.48751e+15
UP_SEQ_FEATURE	domain:EF-hand 3	5	1.30208e+16	0.11720373277941783	78830,20740,12321,19672,17901	366	82	16021	2.6691e+15	1.0	0.9428374634567782	8.76133e+15
UP_SEQ_FEATURE	domain:EF-hand 4	3	0.78125	0.35763337131540673	78830,12321,19672	366	55	16021	2.38763e+15	1.0	0.999789764926252	9.99398e+15
GOTERM_MF_FAT	GO:0005509~calcium ion binding	24	6.25	0.37348373511396404	78830,20740,22027,98878,11749,109711,11472,19089,20190,12321,22070,18803,19672,17901,16971,11426,107513,11474,22138,12306,106393,11938,11937,102866	337	840	13288	1.12658e+16	1.0	0.9466760833188829	9.98784e+15
GOTERM_MF_FAT	GO:0046983~protein dimerization activity	7	1.82292e+16	0.8642088020927692	20740,13722,109711,11474,11472,17886,15519	337	340	13288	0.8117996159888287	1.0	0.9999574793175398	1e+16
Annotation Cluster 25	Enrichment Score: 2.365257645399977
Category	Term	Count	%	PValue	Genes	List Total	Pop Hits	Pop Total	Fold Enrichment	Bonferroni	Benjamini	FDR
UP_SEQ_FEATURE	active site:For GATase activity	4	1.04167e+16	3.83472e+12	27053,14583,51797,237823	366	7	16021	2.50133e+15	0.4600928348949246	0.030347872773556772	0.6405256536279991
SP_PIR_KEYWORDS	glutamine amidotransferase	4	1.04167e+16	4.79641e+11	27053,14583,51797,237823	377	8	17854	2.3679e+16	0.15132294982807026	0.004308495726294881	0.6517630708411604
GOTERM_BP_FAT	GO:0006541~glutamine metabolic process	5	1.30208e+16	8.5382e+11	27053,14583,51797,236539,237823	318	19	13588	1.12446e+16	0.6797421457233358	0.019113763921356552	1.38925e+16
GOTERM_BP_FAT	GO:0009064~glutamine family amino acid metabolic process	5	1.30208e+16	0.01755467006866095	27053,14583,51797,236539,237823	318	43	13588	4.96855e+15	0.9999999999441418	0.21407981735776338	2.51785e+16
GOTERM_MF_FAT	GO:0016879~ligase activity, forming carbon-nitrogen bonds	6	15625	0.5411309569729423	27053,51797,237823,217342,223723,14897	337	193	13288	1.22581e+16	1.0	0.9892713450214399	9.99986e+15
Annotation Cluster 26	Enrichment Score: 2.3509136132927964
Category	Term	Count	%	PValue	Genes	List Total	Pop Hits	Pop Total	Fold Enrichment	Bonferroni	Benjamini	FDR
GOTERM_MF_FAT	GO:0003924~GTPase activity	14	3.64583e+16	2.12052e+11	22142,98878,26908,22151,13627,227613,14696,22152,13629,233870,14469,22154,75471,67951	337	128	13288	4.31269e+15	0.01031587067318851	5.18338e+10	0.030436521923848936
GOTERM_BP_FAT	GO:0043623~cellular protein complex assembly	10	2.60417e+15	9.45142e+11	22142,14228,75751,22151,227613,22152,22154,70572,67951,16211	318	108	13588	3.95644e+15	0.7164792065195995	0.020788702895449984	1.53676e+16
GOTERM_BP_FAT	GO:0051258~protein polymerization	6	15625	0.0022550362973962563	22142,22151,227613,22152,22154,67951	318	40	13588	640943396226415	0.9506766543108621	0.04329028463916029	3.62997e+16
SP_PIR_KEYWORDS	gtp-binding	14	3.64583e+16	0.015836517290407616	22142,26908,22151,13627,227613,22152,13629,74551,233870,14469,22154,53860,75471,67951	377	313	17854	2.11825e+15	0.9957440323565242	0.08838065864820543	1.95533e+15
GOTERM_MF_FAT	GO:0005525~GTP binding	17	4.42708e+15	0.01824964642486083	22142,14228,98878,26908,22151,227613,13627,22152,13629,74551,233870,14469,22154,53860,75471,67951,67059	337	354	13288	1.89354e+15	0.9998773912551845	0.1851029227469867	2.32334e+16
GOTERM_MF_FAT	GO:0032561~guanyl ribonucleotide binding	17	4.42708e+15	0.02249153378469789	22142,14228,98878,26908,22151,227613,13627,22152,13629,74551,233870,14469,22154,53860,75471,67951,67059	337	363	13288	1.8466e+16	0.9999852450427719	0.20685448264390305	278599343994417
GOTERM_MF_FAT	GO:0019001~guanyl nucleotide binding	17	4.42708e+15	0.02249153378469789	22142,14228,98878,26908,22151,227613,13627,22152,13629,74551,233870,14469,22154,53860,75471,67951,67059	337	363	13288	1.8466e+16	0.9999852450427719	0.20685448264390305	278599343994417
UP_SEQ_FEATURE	nucleotide phosphate-binding region:GTP	13	3.38542e+16	0.02358555592532562	22142,26908,22151,13627,227613,13629,22152,74551,233870,14469,22154,53860,67951	366	274	16021	2.07683e+15	1.0	0.521748031474366	3.29601e+15
Annotation Cluster 27	Enrichment Score: 2.3414810490286215
Category	Term	Count	%	PValue	Genes	List Total	Pop Hits	Pop Total	Fold Enrichment	Bonferroni	Benjamini	FDR
UP_SEQ_FEATURE	metal ion-binding site:Magnesium	11	2.86458e+15	1.19841e+11	18746,216136,104112,232087,76952,19139,13808,100044223,11938,11937,11928	366	103	16021	467481033476577	0.17518433746039297	0.010642703427433342	0.20058937523784737
SP_PIR_KEYWORDS	magnesium	20	5.20833e+15	9.59306e+10	18746,11544,18747,232087,67834,13808,269951,15926,105787,67895,216136,104112,76952,22138,100044223,19139,74205,11938,11928,11937	377	403	17854	2.35028e+15	0.27981002530961474	0.00838109773763529	1.29962e+15
GOTERM_MF_FAT	GO:0000287~magnesium ion binding	21	546875	0.0037643490983623423	18746,11544,232087,67834,13808,269951,15926,105787,67895,216136,104112,170718,76952,22138,100044223,19139,74205,23874,11938,11928,11937	337	409	13288	2.02454e+15	0.841854545718389	0.05279748066038625	5.27011e+15
SP_PIR_KEYWORDS	metal-binding	41	1.06771e+16	0.9950036357588813	18746,11657,22793,22225,232087,21849,15926,74551,216136,16993,27267,24131,21399,16971,11429,85305,22138,76952,227197,434246,19046,19045,11928,18451,14201,66445,67834,22186,13808,269951,67895,105787,19070,56445,19053,104112,14199,100044223,19139,11938,11937	377	2682	17854	0.7239678216303996	1.0	0.9999986621246062	100.0
Annotation Cluster 28	Enrichment Score: 2.3397565705165513
Category	Term	Count	%	PValue	Genes	List Total	Pop Hits	Pop Total	Fold Enrichment	Bonferroni	Benjamini	FDR
GOTERM_BP_FAT	GO:0007018~microtubule-based movement	10	2.60417e+15	5.81527e+11	22142,16593,22151,227613,16573,22152,22154,67951,16561,13424	318	101	13588	4.23065e+15	0.5394806353988129	0.013751014267515016	0.9481824733803657
GOTERM_BP_FAT	GO:0043623~cellular protein complex assembly	10	2.60417e+15	9.45142e+11	22142,14228,75751,22151,227613,22152,22154,70572,67951,16211	318	108	13588	3.95644e+15	0.7164792065195995	0.020788702895449984	1.53676e+16
GOTERM_BP_FAT	GO:0034622~cellular macromolecular complex assembly	14	3.64583e+16	0.001774094700329097	14228,22142,75751,13669,22151,27374,227613,22152,16211,668829,22154,67951,70572,17955	318	217	13588	275674579022114	0.9062354541110207	0.03575985231379786	2.86633e+16
GOTERM_BP_FAT	GO:0034621~cellular macromolecular complex subunit organization	15	390625	0.0018633408946950346	19285,14228,22142,75751,13669,22151,27374,227613,22152,16211,668829,22154,70572,67951,17955	318	245	13588	2.6161e+16	0.9167702485468956	0.03696829593281903	3.00846e+15
GOTERM_BP_FAT	GO:0051258~protein polymerization	6	15625	0.0022550362973962563	22142,22151,227613,22152,22154,67951	318	40	13588	640943396226415	0.9506766543108621	0.04329028463916029	3.62997e+16
GOTERM_BP_FAT	GO:0065003~macromolecular complex assembly	17	4.42708e+15	0.005942174052465754	22142,19285,14228,75751,13669,22151,27374,227613,22152,16211,18148,668829,22154,70572,434246,67951,17955	318	338	13588	2.14912e+15	0.9996454089462773	0.10179658971677163	9.2999e+15
GOTERM_BP_FAT	GO:0070271~protein complex biogenesis	13	3.38542e+16	0.007097574178070783	19285,14228,22142,75751,22151,227613,22152,16211,18148,22154,67951,434246,70572	318	227	13588	2.44707e+16	0.9999247580328551	0.11461103600609224	1.10112e+16
GOTERM_BP_FAT	GO:0006461~protein complex assembly	13	3.38542e+16	0.007097574178070783	19285,14228,22142,75751,22151,227613,22152,16211,18148,22154,67951,434246,70572	318	227	13588	2.44707e+16	0.9999247580328551	0.11461103600609224	1.10112e+16
SP_PIR_KEYWORDS	microtubule	12	3125	0.007380225327807401	22142,16593,22151,227613,16573,22152,56430,22154,13427,67951,16561,13424	377	221	17854	2.57148e+16	0.920611132199782	0.04667551538033188	9.60342e+15
GOTERM_BP_FAT	GO:0007017~microtubule-based process	12	3125	0.010785437538573407	22142,16593,22151,227613,18148,16573,22152,22154,17886,67951,16561,13424	318	211	13588	2.43012e+15	0.9999994724811897	0.15148056347456684	1.62726e+15
GOTERM_BP_FAT	GO:0043933~macromolecular complex subunit organization	17	4.42708e+15	0.012520120784285552	22142,19285,14228,75751,13669,22151,27374,227613,22152,16211,18148,668829,22154,70572,434246,67951,17955	318	367	13588	1.9793e+16	0.9999999491648336	0.16685771582558284	1.86452e+16
GOTERM_CC_FAT	GO:0005874~microtubule	13	3.38542e+16	0.01317174130485511	22142,22151,16593,227613,16573,22152,16561,56430,22154,67951,13427,13424,30960	301	240	12504	2.25017e+16	0.9869083070807739	0.06006041478530255	1.64321e+16
GOTERM_CC_FAT	GO:0015630~microtubule cytoskeleton	19	4.94792e+15	0.02378762318390186	22142,13669,22151,16593,227613,16573,22152,17886,16561,21454,19053,18148,11426,56430,22154,13427,67951,13424,30960	301	450	12504	1.75398e+16	0.9996189436422689	0.10357545579917704	2.78153e+16
Annotation Cluster 29	Enrichment Score: 2.2708315647372275
Category	Term	Count	%	PValue	Genes	List Total	Pop Hits	Pop Total	Fold Enrichment	Bonferroni	Benjamini	FDR
GOTERM_CC_FAT	GO:0031974~membrane-enclosed lumen	47	1.22396e+16	5.83688e+11	83701,18747,68263,26926,11737,22027,15184,21849,320011,11674,16905,12321,110826,19672,245688,12304,11409,21399,12406,18148,18597,12974,110842,227197,15482,106393,19045,19184,15387,18451,18453,11669,12387,14828,14827,213464,13382,18293,17913,235339,19983,15510,67273,18538,98758,71853,12261	301	1174	12504	1.66308e+16	0.1738027989704236	0.003664840936677183	0.7873422425281218
GOTERM_CC_FAT	GO:0043233~organelle lumen	45	1171875	9.84583e+11	83701,18747,68263,11737,22027,15184,21849,320011,11674,16905,12321,110826,19672,245688,12304,11409,21399,12406,18148,18597,12974,110842,15482,106393,19045,19184,15387,18451,18453,11669,12387,14828,14827,213464,13382,18293,17913,235339,19983,15510,67273,18538,98758,71853,12261	301	1136	12504	1.64557e+16	0.27538686045073035	0.005635243988534988	1.32478e+16
GOTERM_CC_FAT	GO:0070013~intracellular organelle lumen	44	1.14583e+16	0.0016722983609278345	83701,18747,68263,11737,22027,15184,21849,320011,16905,12321,110826,19672,245688,12304,11409,21399,12406,18148,18597,12974,110842,15482,106393,19045,19184,15387,18451,18453,11669,12387,14828,14827,213464,13382,18293,17913,235339,19983,15510,67273,18538,98758,71853,12261	301	1133	12504	1.61326e+16	0.4214899242953132	0.009233367817188642	2.24046e+15
GOTERM_CC_FAT	GO:0031981~nuclear lumen	18	46875	0.858868163210195	15387,83701,18747,11737,12387,15184,213464,21849,16905,17913,245688,21399,19983,18148,18538,98758,19045,19184	301	883	12504	0.8468261702215717	1.0	0.9951835383344236	1e+16
Annotation Cluster 30	Enrichment Score: 2.245711176124392
Category	Term	Count	%	PValue	Genes	List Total	Pop Hits	Pop Total	Fold Enrichment	Bonferroni	Benjamini	FDR
GOTERM_BP_FAT	GO:0022900~electron transport chain	11	2.86458e+15	2.86398e+12	110826,78830,53382,67273,110842,67003,66445,227197,13382,66945,22273	318	112	13588	4.19665e+15	0.3173845497136255	0.00792310393431972	0.4680341233100682
SP_PIR_KEYWORDS	electron transport	9	234375	0.0012397756382517859	110826,53382,67273,110842,67003,66445,227197,66945,22273	377	100	17854	4.26223e+15	0.34575038117306633	0.009818142826845344	1.67662e+16
SP_PIR_KEYWORDS	respiratory chain	5	1.30208e+16	0.041560861812778994	67273,67003,66445,227197,22273	377	62	17854	3.8192e+16	0.9999995044668996	0.19481327335698806	4.39302e+15
GOTERM_CC_FAT	GO:0070469~respiratory chain	5	1.30208e+16	0.0704948227212307	67273,67003,66445,227197,22273	301	65	12504	3.1955e+16	0.9999999999584718	0.252873010298462	6.28314e+15
Annotation Cluster 31	Enrichment Score: 2.241517552936659
Category	Term	Count	%	PValue	Genes	List Total	Pop Hits	Pop Total	Fold Enrichment	Bonferroni	Benjamini	FDR
GOTERM_CC_FAT	GO:0033279~ribosomal subunit	9	234375	1.71547e+11	20103,433546,19921,18148,20102,668829,16898,16785,27050	301	66	12504	5.66475e+15	0.05455594818589593	0.0013348360688234528	0.23199912789518828
GOTERM_CC_FAT	GO:0022626~cytosolic ribosome	4	1.04167e+16	0.008540798156974342	20103,433546,19921,668829	301	18	12504	9.23145e+15	0.9394832981909181	0.040999058382784725	1.09637e+16
GOTERM_CC_FAT	GO:0022625~cytosolic large ribosomal subunit	3	0.78125	0.011125073132549818	433546,19921,668829	301	7	12504	1.78035e+16	0.9742233492845506	0.05163766581409357	1.40549e+16
GOTERM_CC_FAT	GO:0015934~large ribosomal subunit	4	1.04167e+16	0.06633553261787169	433546,19921,18148,668829	301	39	12504	4.26067e+15	0.9999999998211859	0.24201732161729406	6.05154e+15
Annotation Cluster 32	Enrichment Score: 2.239630285533637
Category	Term	Count	%	PValue	Genes	List Total	Pop Hits	Pop Total	Fold Enrichment	Bonferroni	Benjamini	FDR
SP_PIR_KEYWORDS	calmodulin-binding	9	234375	0.0015002570758517759	20740,17913,29875,20742,94186,17883,71994,17886,22138	377	103	17854	4.13809e+15	0.40158643704576924	0.01134566224523148	2.02556e+16
GOTERM_MF_FAT	GO:0005516~calmodulin binding	9	234375	0.008318297344594813	20740,17913,29875,20742,94186,17883,71994,17886,22138	337	114	13288	3.11292e+16	0.9831711358062081	0.10452073259977279	1.13001e+16
GOTERM_CC_FAT	GO:0016459~myosin complex	6	15625	0.015307667458544186	17913,17901,17883,17885,17886,22138	301	61	12504	408605195795436	0.9935541248742755	0.06858159521430729	1.8848e+16
Annotation Cluster 33	Enrichment Score: 2.0985075171726573
Category	Term	Count	%	PValue	Genes	List Total	Pop Hits	Pop Total	Fold Enrichment	Bonferroni	Benjamini	FDR
UP_SEQ_FEATURE	short sequence motif:Prevents secretion from ER	11	2.86458e+15	7.75111e+08	12321,19672,22027,18453,12304,12406,14828,14827,19089,320011,71853	366	59	16021	8.16111e+15	0.0012448290066100487	1.03795e+12	0.0012985999523262848
GOTERM_CC_FAT	GO:0005788~endoplasmic reticulum lumen	12	3125	1.03795e+10	12321,18451,19672,22027,18453,12304,12406,14828,14827,320011,71853,106393	301	72	12504	6.92359e+15	3.39352e+11	1.02851e+11	0.00140521912198599
GOTERM_CC_FAT	GO:0044432~endoplasmic reticulum part	18	46875	4.20767e+10	18451,22027,18453,103963,14828,14827,19089,20190,320011,12321,15464,19672,12304,12406,20014,71853,106393,11937	301	231	12504	323700220045735	0.01366514860969037	3.71806e+11	0.05695061606401097
GOTERM_CC_FAT	GO:0005783~endoplasmic reticulum	29	7.55208e+15	0.046824123902229335	19285,22027,19309,103963,20190,320011,108124,12321,15464,19672,12304,107513,12406,216197,269523,106393,30960,18451,18453,14828,14827,19089,13722,20014,76983,74205,11938,71853,11937	301	838	12504	1.43759e+16	0.9999998452663319	0.1842575749758416	4.77563e+15
SP_PIR_KEYWORDS	endoplasmic reticulum	21	546875	0.08191830913616208	19285,18451,22027,18453,103963,14828,14827,19089,320011,12321,19672,12304,13722,12406,107513,20014,76983,74205,71853,11938,11937	377	678	17854	146684350132626	0.9999999999997979	0.31928398396472657	6.88053e+15
SP_PIR_KEYWORDS	signal	22	5.72917e+15	0.9999999999854593	18451,11657,22027,18453,103963,14828,14827,19089,320011,11287,12321,19672,12304,16971,107513,12406,20014,14387,11949,106393,71853,14268	377	2970	17854	0.3508006680420474	1.0	1.0	100.0
UP_SEQ_FEATURE	signal peptide	22	5.72917e+15	0.9999999999998231	18451,11657,22027,18453,103963,14828,14827,19089,320011,11287,12321,19672,12304,16971,107513,12406,20014,14387,11949,106393,71853,14268	366	2963	16021	0.32501212587301676	1.0	1.0	100.0
UP_SEQ_FEATURE	glycosylation site:N-linked (GlcNAc...)	18	46875	1.0	18451,22027,20539,14977,103963,19089,320011,11287,12321,12304,16971,107513,12406,20014,14387,22042,106393,14268	366	3444	16021	0.22877991660478664	1.0	1.0	100.0
SP_PIR_KEYWORDS	glycoprotein	21	546875	1.0	18451,22027,20742,20539,14977,103963,18477,19089,320011,11287,12321,19672,12304,16971,107513,12406,20014,14387,22042,106393,14268	377	3600	17854	0.27625552608311227	1.0	1.0	100.0
Annotation Cluster 34	Enrichment Score: 2.053562667798266
Category	Term	Count	%	PValue	Genes	List Total	Pop Hits	Pop Total	Fold Enrichment	Bonferroni	Benjamini	FDR
GOTERM_MF_FAT	GO:0004448~isocitrate dehydrogenase activity	4	1.04167e+16	3.02819e+11	170718,67834,269951,15926	337	6	13288	2.62868e+16	0.1376560550169713	0.005470208798773024	0.4338303687468459
GOTERM_MF_FAT	GO:0051287~NAD or NADH binding	7	1.82292e+16	7.84341e+11	17449,236539,170718,67834,269951,15926,100042025	337	44	13288	627299703264095	0.3186597170039297	0.013143665069913713	112007265718862
UP_SEQ_FEATURE	site:Critical for catalysis	3	0.78125	0.003012894172769716	67834,269951,15926	366	4	16021	3.28299e+16	0.9921640206604772	0.15397630448043031	4.92971e+15
UP_SEQ_FEATURE	metal ion-binding site:Magnesium or manganese	3	0.78125	0.04469638130135127	67834,269951,15926	366	15	16021	8.75464e+15	1.0	0.700193920671581	5.35171e+15
SP_PIR_KEYWORDS	manganese	7	1.82292e+16	0.08642523586508702	19053,67834,269951,15926,19046,19045,74551	377	145	17854	2.28625e+15	0.9999999999999625	0.33066643915706306	7.0829e+15
GOTERM_MF_FAT	GO:0030145~manganese ion binding	7	1.82292e+16	0.17259907461503032	19053,67834,269951,15926,19046,19045,74551	337	148	13288	186494506375812	1.0	0.7595796884207494	9.34116e+15
Annotation Cluster 35	Enrichment Score: 2.047820164682856
Category	Term	Count	%	PValue	Genes	List Total	Pop Hits	Pop Total	Fold Enrichment	Bonferroni	Benjamini	FDR
GOTERM_BP_FAT	GO:0022900~electron transport chain	11	2.86458e+15	2.86398e+12	110826,78830,53382,67273,110842,67003,66445,227197,13382,66945,22273	318	112	13588	4.19665e+15	0.3173845497136255	0.00792310393431972	0.4680341233100682
SP_PIR_KEYWORDS	Flavoprotein	8	2.08333e+15	0.006111685040254616	110826,11370,26926,11409,67273,110842,13382,66945	377	103	17854	3.6783e+15	0.8771277079668512	0.040276440540945146	8.01608e+15
SP_PIR_KEYWORDS	FAD	8	2.08333e+15	0.008264191513386874	110826,11370,26926,11409,67273,110842,13382,66945	377	109	17854	3.47582e+16	0.9414630444873899	0.051200096042125276	1.06945e+15
UP_SEQ_FEATURE	nucleotide phosphate-binding region:FAD	6	15625	0.01019148204792156	11370,26926,11409,110842,13382,66945	366	58	16021	4.52826e+15	0.9999999290818633	0.36699094069571947	1.57703e+16
UP_SEQ_FEATURE	binding site:FAD	4	1.04167e+16	0.013098305360100352	11370,26926,11409,13382	366	22	16021	7.95877e+15	0.9999999993717265	0.42740701742125786	1.982e+15
GOTERM_MF_FAT	GO:0050660~FAD binding	6	15625	0.03363458333183322	11370,26926,11409,110842,13382,66945	337	71	13288	3.33214e+15	0.9999999457831161	0.2751104845452088	3.88074e+15
GOTERM_MF_FAT	GO:0009055~electron carrier activity	10	2.60417e+15	0.07123420345763803	110826,11370,26926,11409,24015,110842,66445,227197,13382,66945	337	202	13288	1.95199e+16	0.9999999999999998	0.4816094683825428	65383602481295
Annotation Cluster 36	Enrichment Score: 1.9306964090251182
Category	Term	Count	%	PValue	Genes	List Total	Pop Hits	Pop Total	Fold Enrichment	Bonferroni	Benjamini	FDR
GOTERM_BP_FAT	GO:0030029~actin filament-based process	15	390625	6.5619e+09	22323,14201,68794,109711,17886,21894,12345,21956,68016,12340,11464,71994,11459,22138,102866	318	176	13588	3.64172e+16	0.08375643335069416	0.002240385228404862	0.10741722995255554
GOTERM_BP_FAT	GO:0030036~actin cytoskeleton organization	14	3.64583e+16	1.31269e+11	22323,14201,109711,17886,21894,12345,21956,68016,12340,11464,71994,11459,22138,102866	318	165	13588	3.62554e+15	0.16053762931894067	0.003969229586619383	0.21477735141210985
GOTERM_BP_FAT	GO:0031032~actomyosin structure organization	6	15625	2.42303e+12	11464,71994,22138,11459,21956,68016	318	25	13588	1.02551e+15	0.27604715487326403	0.00684939310970345	0.39610746852543066
GOTERM_BP_FAT	GO:0030239~myofibril assembly	5	1.30208e+16	8.5382e+11	11464,22138,11459,21956,68016	318	19	13588	1.12446e+16	0.6797421457233358	0.019113763921356552	1.38925e+16
GOTERM_BP_FAT	GO:0007010~cytoskeleton organization	18	46875	0.0016977409162419862	22323,14201,16664,109711,17886,21894,12345,21956,68016,12340,18148,11464,71994,22154,11459,22138,22629,102866	318	326	13588	2.3593e+15	0.8961711997348331	0.0347718789820014	274457104921757
GOTERM_BP_FAT	GO:0007517~muscle organ development	12	3125	0.0028244677327420747	21952,12955,14359,11464,22003,286940,13346,22138,11459,434246,21956,68016	318	176	13588	2.91338e+15	0.9769558330737507	0.052437174085948945	4.52682e+15
GOTERM_BP_FAT	GO:0055003~cardiac myofibril assembly	3	0.78125	0.007648483060513127	11464,22138,68016	318	6	13588	2.13648e+16	0.9999640944132369	0.12151120155299622	1.18164e+16
GOTERM_BP_FAT	GO:0060415~muscle tissue morphogenesis	4	1.04167e+16	0.00791357493688511	21952,11464,22003,21956	318	18	13588	9.49546e+15	0.9999748526051808	0.12256296148058154	1.22014e+16
GOTERM_BP_FAT	GO:0055008~cardiac muscle tissue morphogenesis	4	1.04167e+16	0.00791357493688511	21952,11464,22003,21956	318	18	13588	9.49546e+15	0.9999748526051808	0.12256296148058154	1.22014e+16
GOTERM_BP_FAT	GO:0055002~striated muscle cell development	6	15625	0.008320037473649039	68794,11464,22138,11459,21956,68016	318	54	13588	4.74773e+15	0.9999854366813757	0.12699773569045314	1.27887e+16
GOTERM_BP_FAT	GO:0010927~cellular component assembly involved in morphogenesis	5	1.30208e+16	0.009510362381210717	11464,22138,11459,21956,68016	318	36	13588	593466107617051	0.9999970625859255	0.140704687861943	1.44874e+16
GOTERM_BP_FAT	GO:0048738~cardiac muscle tissue development	6	15625	0.010411951107832149	21952,11464,22003,22138,21956,68016	318	57	13588	4.49785e+15	0.9999991274891362	0.1513767011514584	1.57534e+15
GOTERM_BP_FAT	GO:0055001~muscle cell development	6	15625	0.01372503362547989	68794,11464,22138,11459,21956,68016	318	61	13588	4.20291e+16	0.9999999900150169	0.1779718807566837	2.02558e+16
GOTERM_BP_FAT	GO:0051146~striated muscle cell differentiation	7	1.82292e+16	0.017736092676390963	68794,11464,17886,22138,11459,21956,68016	318	89	13588	3.36075e+15	0.999999999956331	0.21036307067518922	2.54045e+16
GOTERM_BP_FAT	GO:0042692~muscle cell differentiation	8	2.08333e+15	0.019723138166715122	68794,11464,17886,22138,30948,11459,21956,68016	318	117	13588	292167929903779	0.9999999999970631	0.22725228488382443	2.78379e+16
GOTERM_BP_FAT	GO:0003007~heart morphogenesis	6	15625	0.02916791209145175	21952,11464,22003,14387,22138,21956	318	74	13588	3.46456e+16	1.0	0.3014296715340574	3.84192e+15
GOTERM_BP_FAT	GO:0014706~striated muscle tissue development	8	2.08333e+15	0.02927421113908016	21952,11464,22003,286940,22138,11459,21956,68016	318	127	13588	2.69163e+16	1.0	0.30008941299395553	3.85295e+16
GOTERM_BP_FAT	GO:0060537~muscle tissue development	8	2.08333e+15	0.040189935299376346	21952,11464,22003,286940,22138,11459,21956,68016	318	136	13588	2.5135e+15	1.0	0.38099661801299667	489225425576197
GOTERM_BP_FAT	GO:0055013~cardiac muscle cell development	3	0.78125	0.04103859759720106	11464,22138,68016	318	14	13588	915633423180593	1.0	0.38216877674488114	496572119502273
GOTERM_BP_FAT	GO:0055006~cardiac cell development	3	0.78125	0.04103859759720106	11464,22138,68016	318	14	13588	915633423180593	1.0	0.38216877674488114	496572119502273
GOTERM_BP_FAT	GO:0055010~ventricular cardiac muscle morphogenesis	3	0.78125	0.04663736665100508	21952,22003,21956	318	15	13588	8.54591e+15	1.0	0.41965738752421833	5.42609e+15
GOTERM_BP_FAT	GO:0055007~cardiac muscle cell differentiation	3	0.78125	0.13816510048017028	11464,22138,68016	318	28	13588	4.57817e+15	1.0	0.7646680036065303	9.12427e+15
GOTERM_BP_FAT	GO:0007507~heart development	9	234375	0.1524773102759528	21952,12387,11464,22003,14387,15184,22138,21956,68016	318	223	13588	1.72451e+16	1.0	0.7930344520520353	9.33433e+15
GOTERM_BP_FAT	GO:0035051~cardiac cell differentiation	3	0.78125	0.17931391612392125	11464,22138,68016	318	33	13588	3.88451e+15	1.0	0.8272889110636966	9.60701e+15
GOTERM_BP_FAT	GO:0048729~tissue morphogenesis	9	234375	0.1929750670652752	22323,18747,21952,11426,12034,12387,11464,22003,21956	318	238	13588	1.61582e+16	1.0	0.8417922366893056	9.70147e+15
GOTERM_BP_FAT	GO:0032989~cellular component morphogenesis	12	3125	0.19920411792469545	22323,11426,12387,11464,668829,17886,12385,22138,21849,11459,21956,68016	318	351	13588	1.46084e+15	1.0	0.8501673651857667	9.73705e+15
Annotation Cluster 37	Enrichment Score: 1.848933038285545
Category	Term	Count	%	PValue	Genes	List Total	Pop Hits	Pop Total	Fold Enrichment	Bonferroni	Benjamini	FDR
GOTERM_CC_FAT	GO:0030863~cortical cytoskeleton	8	2.08333e+15	6.55092e+10	20740,12340,20742,109711,16332,17886,11461,12345	301	43	12504	7.72866e+15	0.021194375148938738	5.63583e+11	0.08865329549443413
GOTERM_CC_FAT	GO:0044448~cell cortex part	9	234375	3.47332e+11	20740,12340,20742,109711,16332,17886,53860,11461,12345	301	73	12504	5.12156e+15	0.10738256324220352	0.002363809961220098	0.46921306337427415
GOTERM_CC_FAT	GO:0005938~cell cortex	11	2.86458e+15	9.01686e+11	20740,12340,20742,11426,109711,16332,286940,17886,53860,11461,12345	301	126	12504	3.62664e+15	0.2554567857966479	0.00525372892243281	1.21387e+16
GOTERM_BP_FAT	GO:0030833~regulation of actin filament polymerization	6	15625	0.003808763500333388	20740,12340,20742,76709,12345,74117	318	45	13588	569727463312369	0.9938220888646825	0.06730949204525183	605863379663476
SP_PIR_KEYWORDS	actin capping	4	1.04167e+16	0.00423177638251614	20740,12340,20742,12345	377	16	17854	1.18395e+16	0.7655090877981174	0.029763462662896978	5.61618e+15
GOTERM_BP_FAT	GO:0008064~regulation of actin polymerization or depolymerization	6	15625	0.006010100540696253	20740,12340,20742,76709,12345,74117	318	50	13588	512754716981132	0.9996762813460128	0.10160173815623685	9.40136e+15
GOTERM_BP_FAT	GO:0030832~regulation of actin filament length	6	15625	0.006538975067822854	20740,12340,20742,76709,12345,74117	318	51	13588	5.02701e+15	0.9998407566381297	0.10869339909956377	1.01876e+16
GOTERM_BP_FAT	GO:0051693~actin filament capping	4	1.04167e+16	0.009237278904758003	20740,12340,20742,12345	318	19	13588	8.9957e+15	0.999995758171384	0.13846738272442516	1.41005e+16
GOTERM_BP_FAT	GO:0032271~regulation of protein polymerization	6	15625	0.010411951107832149	20740,12340,20742,76709,12345,74117	318	57	13588	4.49785e+15	0.9999991274891362	0.1513767011514584	1.57534e+15
GOTERM_BP_FAT	GO:0030835~negative regulation of actin filament depolymerization	4	1.04167e+16	0.012251091106039214	20740,12340,20742,12345	318	21	13588	8.13896e+15	0.9999999269092137	0.1652029454333388	1.82814e+16
GOTERM_BP_FAT	GO:0032956~regulation of actin cytoskeleton organization	6	15625	0.012838179839723343	20740,12340,20742,76709,12345,74117	318	60	13588	4.27296e+15	0.9999999669119896	0.16906634169759305	1.90733e+16
GOTERM_BP_FAT	GO:0032970~regulation of actin filament-based process	6	15625	0.01372503362547989	20740,12340,20742,76709,12345,74117	318	61	13588	4.20291e+16	0.9999999900150169	0.1779718807566837	2.02558e+16
GOTERM_BP_FAT	GO:0043254~regulation of protein complex assembly	6	15625	0.01768314686308094	20740,12340,20742,76709,12345,74117	318	65	13588	3.94427e+15	0.999999999953078	0.21355117619881048	2.53386e+16
GOTERM_BP_FAT	GO:0030834~regulation of actin filament depolymerization	4	1.04167e+16	0.017711567561823717	20740,12340,20742,12345	318	24	13588	7.12159e+15	0.9999999999548532	0.21196362097963228	2.5374e+16
GOTERM_BP_FAT	GO:0030837~negative regulation of actin filament polymerization	4	1.04167e+16	0.019786426056713362	20740,12340,20742,12345	318	25	13588	6.83673e+15	0.9999999999973053	0.22597515862669248	2.79142e+16
GOTERM_BP_FAT	GO:0032272~negative regulation of protein polymerization	4	1.04167e+16	0.024320893920866834	20740,12340,20742,12345	318	27	13588	6.33031e+15	0.9999999999999944	0.26844012038818366	3.31857e+15
GOTERM_BP_FAT	GO:0031333~negative regulation of protein complex assembly	4	1.04167e+16	0.024320893920866834	20740,12340,20742,12345	318	27	13588	6.33031e+15	0.9999999999999944	0.26844012038818366	3.31857e+15
GOTERM_BP_FAT	GO:0051493~regulation of cytoskeleton organization	7	1.82292e+16	0.02826420188066482	20740,12340,20742,18148,76709,12345,74117	318	99	13588	3.02128e+16	1.0	0.29575704865353714	3.74736e+16
GOTERM_BP_FAT	GO:0043242~negative regulation of protein complex disassembly	4	1.04167e+16	0.04753350542791357	20740,12340,20742,12345	318	35	13588	4.88338e+15	1.0	0.42046299242866014	5.496e+15
GOTERM_BP_FAT	GO:0044087~regulation of cellular component biogenesis	6	15625	0.05698587632285623	20740,12340,20742,76709,12345,74117	318	89	13588	2.88064e+16	1.0	0.476063103424345	6.17478e+15
GOTERM_BP_FAT	GO:0051129~negative regulation of cellular component organization	6	15625	0.06630937887380803	20740,12340,20742,22629,12345,23970	318	93	13588	275674579022114	1.0	0.5217200106467417	6.74926e+15
GOTERM_BP_FAT	GO:0033043~regulation of organelle organization	8	2.08333e+15	0.06921678378510042	20740,12340,20742,18148,76709,22629,12345,74117	318	154	13588	2.21972e+16	1.0	0.5346273370700634	6.91114e+15
GOTERM_BP_FAT	GO:0043244~regulation of protein complex disassembly	4	1.04167e+16	0.07839697148610983	20740,12340,20742,12345	318	43	13588	3.97484e+15	1.0	0.5755266098434519	7.37399e+15
GOTERM_BP_FAT	GO:0051494~negative regulation of cytoskeleton organization	4	1.04167e+16	0.1011301567134763	20740,12340,20742,12345	318	48	13588	3.5608e+16	1.0	0.6676974253764922	8.25562e+15
GOTERM_BP_FAT	GO:0032535~regulation of cellular component size	7	1.82292e+16	0.17473172920603747	20740,12340,20742,18148,76709,12345,74117	318	161	13588	1.85781e+16	1.0	0.8247401107221112	9.56949e+15
GOTERM_BP_FAT	GO:0010639~negative regulation of organelle organization	4	1.04167e+16	0.17586857193385272	20740,12340,20742,12345	318	62	13588	275674579022114	1.0	0.8248538100851217	9.5791e+15
Annotation Cluster 38	Enrichment Score: 1.7790642715251066
Category	Term	Count	%	PValue	Genes	List Total	Pop Hits	Pop Total	Fold Enrichment	Bonferroni	Benjamini	FDR
GOTERM_CC_FAT	GO:0005912~adherens junction	11	2.86458e+15	2.26911e+12	22323,20740,22793,12387,109711,286940,17886,12385,22330,21894,76709	301	106	12504	4.31091e+15	0.07152185658053356	0.0016119263648520787	0.3067677345330755
GOTERM_CC_FAT	GO:0070161~anchoring junction	11	2.86458e+15	7.47711e+11	22323,20740,22793,12387,109711,286940,17886,12385,22330,21894,76709	301	123	12504	3.7151e+16	0.21697683944082335	0.004519257362386342	1.00756e+16
GOTERM_CC_FAT	GO:0005913~cell-cell adherens junction	6	15625	7.82651e+11	20740,22793,12387,17886,12385,22330	301	31	12504	8.0403e+15	0.22587892182605596	0.004644218218678109	1.05441e+16
GOTERM_CC_FAT	GO:0031252~cell leading edge	10	2.60417e+15	0.0014792758565496014	22323,29875,12387,17886,12385,21894,76709,12345,74117,22352	301	112	12504	370906502135738	0.3837369259478415	0.008311496891441728	1.98425e+16
GOTERM_CC_FAT	GO:0014704~intercalated disc	4	1.04167e+16	0.0019554141917329975	20740,12387,22330,12345	301	11	12504	1.5106e+16	0.4727320537626791	0.010610745014568157	2.61513e+16
GOTERM_CC_FAT	GO:0005925~focal adhesion	7	1.82292e+16	0.0023558579097610124	22323,22793,109711,286940,22330,21894,76709	301	57	12504	5.10159e+15	0.5375766197507075	0.012564245072246072	3.1428e+15
GOTERM_CC_FAT	GO:0005924~cell-substrate adherens junction	7	1.82292e+16	0.0033285478388744997	22323,22793,109711,286940,22330,21894,76709	301	61	12504	476706061761342	0.6638677607566116	0.017430979208434838	4.41352e+15
GOTERM_CC_FAT	GO:0030055~cell-substrate junction	7	1.82292e+16	0.004931161198311662	22323,22793,109711,286940,22330,21894,76709	301	66	12504	4.40592e+15	0.8014031827998331	0.024941175907137403	6.47354e+15
GOTERM_CC_FAT	GO:0016323~basolateral plasma membrane	10	2.60417e+15	0.006910711531016327	22323,22793,12387,109711,286940,22330,21894,17698,76709,11928	301	141	12504	2.94621e+16	0.8964444665217111	0.03377474791508983	8.96131e+15
GOTERM_CC_FAT	GO:0005916~fascia adherens	3	0.78125	0.011125073132549818	20740,12387,22330	301	7	12504	1.78035e+16	0.9742233492845506	0.05163766581409357	1.40549e+16
GOTERM_CC_FAT	GO:0005911~cell-cell junction	8	2.08333e+15	0.12297285546556154	20740,22793,12387,17886,12385,66395,22330,12345	301	173	12504	1.921e+16	1.0	0.3792062134988444	8.30769e+15
GOTERM_CC_FAT	GO:0030054~cell junction	14	3.64583e+16	0.34037020976312227	20740,22323,22793,12387,109711,286940,17886,21894,22330,12345,12385,66395,76709,12306	301	470	12504	1.23741e+15	1.0	0.7331162151663282	9.96422e+15
SP_PIR_KEYWORDS	cell adhesion	7	1.82292e+16	0.8148644811752199	13722,22793,12387,16332,12385,22330,14268	377	380	17854	0.8723858718414071	1.0	0.993075989722878	999999999896234
GOTERM_BP_FAT	GO:0007155~cell adhesion	9	234375	0.9536346401311617	13722,22793,12387,16332,17886,12385,22330,21894,14268	318	561	13588	0.6855009585309253	1.0	0.9999983119318142	100.0
GOTERM_BP_FAT	GO:0022610~biological adhesion	9	234375	0.9542293404743882	13722,22793,12387,16332,17886,12385,22330,21894,14268	318	562	13588	0.6842812059356744	1.0	0.9999983331913161	100.0
SP_PIR_KEYWORDS	cell junction	5	1.30208e+16	0.9670878036679803	22323,22793,12387,12385,22330	377	392	17854	0.6040572727764846	1.0	0.999912201239898	100.0
Annotation Cluster 39	Enrichment Score: 1.7661965240353061
Category	Term	Count	%	PValue	Genes	List Total	Pop Hits	Pop Total	Fold Enrichment	Bonferroni	Benjamini	FDR
SP_PIR_KEYWORDS	nad	10	2.60417e+15	0.009708402256452357	269378,16828,17449,236539,11669,67834,227197,13382,14104,100042025	377	169	17854	2.80225e+16	0.9644386508250701	0.05886017859508852	1.24508e+16
UP_SEQ_FEATURE	binding site:NAD	5	1.30208e+16	0.020389143158099695	16828,17449,236539,13382,100042025	366	46	16021	4.75796e+15	0.9999999999999958	0.4982566352383534	2.91869e+16
UP_SEQ_FEATURE	nucleotide phosphate-binding region:NAD	6	15625	0.02540175308410125	16828,17449,236539,11669,13382,100042025	366	73	16021	3.5978e+15	1.0	0.5416633963771026	3.5019e+15
Annotation Cluster 40	Enrichment Score: 1.691487056347585
Category	Term	Count	%	PValue	Genes	List Total	Pop Hits	Pop Total	Fold Enrichment	Bonferroni	Benjamini	FDR
UP_SEQ_FEATURE	repeat:Solcar 3	5	1.30208e+16	0.017569666630001566	78830,11739,18674,11740,67863	366	44	16021	4.97423e+15	0.9999999999995745	0.4765931556512505	2.56938e+16
UP_SEQ_FEATURE	repeat:Solcar 1	5	1.30208e+16	0.021897153100594396	78830,11739,18674,11740,67863	366	47	16021	4.65673e+15	0.9999999999999997	0.5091389539058184	3.09913e+16
UP_SEQ_FEATURE	repeat:Solcar 2	5	1.30208e+16	0.021897153100594396	78830,11739,18674,11740,67863	366	47	16021	4.65673e+15	0.9999999999999997	0.5091389539058184	3.09913e+16
Annotation Cluster 41	Enrichment Score: 1.6566473332918548
Category	Term	Count	%	PValue	Genes	List Total	Pop Hits	Pop Total	Fold Enrichment	Bonferroni	Benjamini	FDR
UP_SEQ_FEATURE	repeat:WD 5	12	3125	0.00671683728933255	27979,245688,94186,14696,54709,14694,213464,22138,70465,13427,12847,22388	366	202	16021	2.60039e+16	0.9999802107421575	0.2797760471545663	1.06771e+15
UP_SEQ_FEATURE	repeat:WD 4	12	3125	0.011534722715171223	27979,245688,94186,14696,54709,14694,213464,22138,70465,13427,12847,22388	366	218	16021	2.40954e+15	0.9999999920016791	0.3958258629792595	1.7665e+16
UP_SEQ_FEATURE	repeat:WD 3	12	3125	0.016982551863955628	27979,245688,94186,14696,54709,14694,213464,22138,70465,13427,12847,22388	366	231	16021	2.27393e+16	0.9999999999988886	0.47277321900779723	2.49463e+15
UP_SEQ_FEATURE	repeat:WD 1	12	3125	0.019124753807931015	27979,245688,94186,14696,54709,14694,213464,22138,70465,13427,12847,22388	366	235	16021	2.23523e+15	0.9999999999999666	0.4906350709193189	2.764e+16
UP_SEQ_FEATURE	repeat:WD 2	12	3125	0.019124753807931015	27979,245688,94186,14696,54709,14694,213464,22138,70465,13427,12847,22388	366	235	16021	2.23523e+15	0.9999999999999666	0.4906350709193189	2.764e+16
SP_PIR_KEYWORDS	wd repeat	12	3125	0.024157328739145247	27979,245688,94186,14696,54709,14694,213464,22138,70465,13427,12847,22388	377	263	17854	2.16083e+16	0.9997667115390166	0.12618874717816841	2.83446e+16
UP_SEQ_FEATURE	repeat:WD 6	9	234375	0.03131056653059578	245688,94186,14696,14694,213464,22138,13427,12847,22388	366	161	16021	2.44695e+16	1.0	0.592148924858819	4.13134e+15
UP_SEQ_FEATURE	repeat:WD 7	6	15625	0.15336097315141314	245688,14696,14694,22138,13427,22388	366	124	16021	2.11806e+16	1.0	0.9743922269645761	9.38529e+15
Annotation Cluster 42	Enrichment Score: 1.6131041817646572
Category	Term	Count	%	PValue	Genes	List Total	Pop Hits	Pop Total	Fold Enrichment	Bonferroni	Benjamini	FDR
GOTERM_BP_FAT	GO:0006073~cellular glucan metabolic process	5	1.30208e+16	0.006976781469951475	19309,14387,19046,19045,77559	318	33	13588	6.47418e+15	0.9999115119988571	0.11414603195143314	1.08337e+16
GOTERM_BP_FAT	GO:0044042~glucan metabolic process	5	1.30208e+16	0.006976781469951475	19309,14387,19046,19045,77559	318	33	13588	6.47418e+15	0.9999115119988571	0.11414603195143314	1.08337e+16
GOTERM_BP_FAT	GO:0005977~glycogen metabolic process	5	1.30208e+16	0.006976781469951475	19309,14387,19046,19045,77559	318	33	13588	6.47418e+15	0.9999115119988571	0.11414603195143314	1.08337e+16
GOTERM_BP_FAT	GO:0006112~energy reserve metabolic process	5	1.30208e+16	0.010471449661357421	19309,14387,19046,19045,77559	318	37	13588	5.77426e+15	0.9999991946905228	0.15054749296090653	1.58363e+16
GOTERM_BP_FAT	GO:0044264~cellular polysaccharide metabolic process	5	1.30208e+16	0.01755467006866095	19309,14387,19046,19045,77559	318	43	13588	4.96855e+15	0.9999999999441418	0.21407981735776338	2.51785e+16
SP_PIR_KEYWORDS	glycogen metabolism	3	0.78125	0.05975762477351882	19309,19046,19045	377	19	17854	7.47759e+15	0.9999999992952768	0.24781516250583757	5.68218e+16
GOTERM_BP_FAT	GO:0005976~polysaccharide metabolic process	5	1.30208e+16	0.16765446145052137	19309,14387,19046,19045,77559	318	92	13588	2.32226e+15	1.0	0.817082451886967	9.50486e+15
SP_PIR_KEYWORDS	carbohydrate metabolism	4	1.04167e+16	0.1990642459407566	13722,19309,19046,19045	377	73	17854	2.59496e+15	1.0	0.6037841980639903	9.51465e+15
Annotation Cluster 43	Enrichment Score: 1.4262072645518746
Category	Term	Count	%	PValue	Genes	List Total	Pop Hits	Pop Total	Fold Enrichment	Bonferroni	Benjamini	FDR
SP_PIR_KEYWORDS	motor protein	10	2.60417e+15	0.001182861269859589	17913,17901,16593,17883,16573,17885,17886,13427,16561,13424	377	123	17854	3.85025e+15	0.33287510360249684	0.00959127886350919	1.60022e+15
GOTERM_MF_FAT	GO:0003774~motor activity	10	2.60417e+15	0.008401998737591532	17913,17901,16593,17883,16573,17885,17886,13427,16561,13424	337	138	13288	2.85727e+16	0.9838516080956495	0.1028903932095584	1.14075e+16
GOTERM_CC_FAT	GO:0016459~myosin complex	6	15625	0.015307667458544186	17913,17901,17883,17885,17886,22138	301	61	12504	408605195795436	0.9935541248742755	0.06858159521430729	1.8848e+16
SP_PIR_KEYWORDS	myosin	5	1.30208e+16	0.016942571520013508	17913,17901,17883,17885,17886	377	47	17854	5.03809e+15	0.997102788920841	0.09280704500116366	2.07769e+16
UP_SEQ_FEATURE	domain:Myosin head-like	4	1.04167e+16	0.027657822361141934	17913,17883,17885,17886	366	29	16021	6.03769e+15	1.0	0.5659835661259361	3.74937e+16
GOTERM_BP_FAT	GO:0030705~cytoskeleton-dependent intracellular transport	4	1.04167e+16	0.04098244183083214	16593,16573,17886,16561	318	33	13588	5.17934e+15	1.0	0.3843326697945406	4.96089e+16
GOTERM_BP_FAT	GO:0010970~microtubule-based transport	3	0.78125	0.06493790140942754	16593,16573,16561	318	18	13588	7.12159e+15	1.0	0.5169563448969868	6.67017e+15
UP_SEQ_FEATURE	region of interest:Actin-binding	3	0.78125	0.10290817139801128	17883,17885,17886	366	24	16021	5.47165e+15	1.0	0.926075304173365	8.3788e+15
GOTERM_CC_FAT	GO:0005875~microtubule associated complex	5	1.30208e+16	0.10955429806141943	16593,16573,13427,16561,13424	301	76	12504	2.733e+15	1.0	0.347095269997604	7.92145e+15
GOTERM_MF_FAT	GO:0003777~microtubule motor activity	4	1.04167e+16	0.28100686485897597	16593,16573,16561,13424	337	73	13288	2.16056e+15	1.0	0.890288525730768	9.91225e+15
UP_SEQ_FEATURE	domain:IQ	3	0.78125	0.3410397837845035	17883,17885,17886	366	53	16021	2.47773e+16	1.0	0.9997181084626454	9.99077e+15
Annotation Cluster 44	Enrichment Score: 1.4122911722792457
Category	Term	Count	%	PValue	Genes	List Total	Pop Hits	Pop Total	Fold Enrichment	Bonferroni	Benjamini	FDR
GOTERM_BP_FAT	GO:0006605~protein targeting	11	2.86458e+15	0.0011118558609418245	75751,20742,22631,11426,22630,54401,22627,70572,22628,16211,15526	318	133	13588	3.53402e+16	0.77302795453505	0.024017186570338467	1.80552e+15
COG_ONTOLOGY	Intracellular trafficking and secretion	6	15625	0.0019079043981242165	320528,75751,76983,70572,16211,271564	47	41	2040	6.35184e+15	0.02638192730002553	0.008872463561070854	1.28888e+16
UP_SEQ_FEATURE	repeat:HEAT 6	5	1.30208e+16	0.0026641638554372716	75751,67088,70572,51792,16211	366	26	16021	8.41793e+15	0.9862542352796243	0.14196296721042911	4.37104e+15
UP_SEQ_FEATURE	repeat:HEAT 5	5	1.30208e+16	0.004546769983785462	75751,67088,70572,51792,16211	366	30	16021	7.29554e+15	0.9993400330081107	0.2045551594980468	7.35076e+15
UP_SEQ_FEATURE	repeat:HEAT 4	5	1.30208e+16	0.009674461397256372	75751,67088,70572,51792,16211	366	37	16021	5.9153e+15	0.9999998358609324	0.36839230763757946	1.50301e+16
UP_SEQ_FEATURE	repeat:HEAT 3	5	1.30208e+16	0.013819879178664103	75751,67088,70572,51792,16211	366	41	16021	5.3382e+15	0.9999999998060526	0.4282685299548161	2.07966e+16
UP_SEQ_FEATURE	repeat:HEAT 1	5	1.30208e+16	0.02347157842189867	75751,67088,70572,51792,16211	366	48	16021	4.55971e+15	1.0	0.5268783324466937	3.28289e+15
UP_SEQ_FEATURE	repeat:HEAT 2	5	1.30208e+16	0.02347157842189867	75751,67088,70572,51792,16211	366	48	16021	4.55971e+15	1.0	0.5268783324466937	3.28289e+15
GOTERM_BP_FAT	GO:0006913~nucleocytoplasmic transport	7	1.82292e+16	0.024757370161970868	75751,20742,18148,75471,70572,16211,15526	318	96	13588	3.1157e+16	0.9999999999999969	0.27039672167552853	3.36736e+16
GOTERM_BP_FAT	GO:0051169~nuclear transport	7	1.82292e+16	0.027060931101224622	75751,20742,18148,75471,70572,16211,15526	318	98	13588	3.05211e+16	0.9999999999999999	0.2872356880807725	3.61934e+16
UP_SEQ_FEATURE	domain:Importin N-terminal	3	0.78125	0.03931725871745679	75751,70572,16211	366	14	16021	9.37998e+15	1.0	0.658465933366754	4.89321e+16
GOTERM_BP_FAT	GO:0000059~protein import into nucleus, docking	3	0.78125	0.04663736665100508	75751,70572,16211	318	15	13588	8.54591e+15	1.0	0.41965738752421833	5.42609e+15
UP_SEQ_FEATURE	repeat:HEAT 8	3	0.78125	0.05032902003706895	67088,51792,16211	366	16	16021	8.20748e+15	1.0	0.7377527404325177	5.79017e+16
UP_SEQ_FEATURE	repeat:HEAT 7	3	0.78125	0.08181307640039386	67088,51792,16211	366	21	16021	6.25332e+15	1.0	0.8866428442755182	7.60694e+15
GOTERM_BP_FAT	GO:0006606~protein import into nucleus	4	1.04167e+16	0.14211441923289234	75751,20742,70572,16211	318	56	13588	3.05211e+15	1.0	0.7700716983469006	9.18773e+15
GOTERM_BP_FAT	GO:0051170~nuclear import	4	1.04167e+16	0.15311444392088455	75751,20742,70572,16211	318	58	13588	2.94687e+15	1.0	0.7921920658928423	9.34248e+15
GOTERM_CC_FAT	GO:0005635~nuclear envelope	7	1.82292e+16	0.16228054944037415	17913,75751,18538,70572,16211,114584,16905	301	153	12504	1.90059e+15	1.0	0.45291525682296097	90903611719547
GOTERM_CC_FAT	GO:0005643~nuclear pore	4	1.04167e+16	0.16816681762407173	17913,75751,70572,16211	301	59	12504	2.81637e+15	1.0	0.4624344234913358	9.17318e+15
GOTERM_BP_FAT	GO:0034504~protein localization in nucleus	4	1.04167e+16	0.17009245902692036	75751,20742,70572,16211	318	61	13588	2.80194e+15	1.0	0.8198510415950659	9.52809e+15
GOTERM_BP_FAT	GO:0033365~protein localization in organelle	5	1.30208e+16	0.19084270103171602	75751,20742,11426,70572,16211	318	97	13588	2.20255e+15	1.0	0.8400634955852243	9.68829e+15
GOTERM_MF_FAT	GO:0008565~protein transporter activity	4	1.04167e+16	0.23321054337596703	75751,56440,70572,16211	337	66	13288	238971315529179	1.0	0.8435482545800368	9.77895e+15
GOTERM_CC_FAT	GO:0046930~pore complex	4	1.04167e+16	0.2553745878052684	17913,75751,70572,16211	301	73	12504	2.27625e+16	1.0	0.6224218541361897	981540144121292
GOTERM_BP_FAT	GO:0017038~protein import	4	1.04167e+16	0.29940919858791354	75751,20742,70572,16211	318	82	13588	2.08437e+15	1.0	0.9405935162950909	9.97056e+15
Annotation Cluster 45	Enrichment Score: 1.3435039540105933
Category	Term	Count	%	PValue	Genes	List Total	Pop Hits	Pop Total	Fold Enrichment	Bonferroni	Benjamini	FDR
SP_PIR_KEYWORDS	tpr repeat	9	234375	0.010075007755756043	14228,66736,18451,20867,16593,22138,74148,70356,271564	377	141	17854	3.02286e+16	0.9686683845743832	0.05996819062575964	1.28916e+16
UP_SEQ_FEATURE	repeat:TPR 3	8	2.08333e+15	0.018392702356458145	14228,66736,20867,16593,22138,74148,70356,271564	366	118	16021	2.96768e+15	0.9999999999998893	0.48466562806301483	2.67299e+16
UP_SEQ_FEATURE	repeat:TPR 1	8	2.08333e+15	0.029351236120133056	14228,66736,20867,16593,22138,74148,70356,271564	366	130	16021	2.69374e+16	1.0	0.581227403175523	3.92927e+15
UP_SEQ_FEATURE	repeat:TPR 2	8	2.08333e+15	0.029351236120133056	14228,66736,20867,16593,22138,74148,70356,271564	366	130	16021	2.69374e+16	1.0	0.581227403175523	3.92927e+15
UP_SEQ_FEATURE	repeat:TPR 4	5	1.30208e+16	0.11720373277941783	20867,16593,22138,74148,271564	366	82	16021	2.6691e+15	1.0	0.9428374634567782	8.76133e+15
UP_SEQ_FEATURE	repeat:TPR 6	4	1.04167e+16	0.12996262252490925	20867,16593,22138,271564	366	55	16021	3.18351e+16	1.0	0.9571931775230684	9.02943e+15
UP_SEQ_FEATURE	repeat:TPR 5	4	1.04167e+16	0.162020022289971	20867,16593,22138,271564	366	61	16021	2.87038e+15	1.0	0.9784758916265589	9.48255e+15
Annotation Cluster 46	Enrichment Score: 1.1525961266789198
Category	Term	Count	%	PValue	Genes	List Total	Pop Hits	Pop Total	Fold Enrichment	Bonferroni	Benjamini	FDR
GOTERM_CC_FAT	GO:0044433~cytoplasmic vesicle part	7	1.82292e+16	0.02663072615582936	109711,13382,67300,434246,12847,11674,16561	301	95	12504	3.06095e+15	0.9998531797574319	0.11388473467579108	3.06101e+15
GOTERM_CC_FAT	GO:0012506~vesicle membrane	6	15625	0.08375682468248866	68938,109711,67300,434246,12847,16561	301	97	12504	2.56958e+15	0.999999999999622	0.2857452597001199	6.94028e+15
GOTERM_CC_FAT	GO:0030659~cytoplasmic vesicle membrane	5	1.30208e+16	0.15624581971315704	109711,67300,434246,12847,16561	301	87	12504	2.38744e+15	1.0	0.44277898096646906	8.99753e+15
Annotation Cluster 47	Enrichment Score: 1.1101393275180305
Category	Term	Count	%	PValue	Genes	List Total	Pop Hits	Pop Total	Fold Enrichment	Bonferroni	Benjamini	FDR
GOTERM_CC_FAT	GO:0000267~cell fraction	23	5.98958e+15	0.030337418149172776	19285,68938,26926,17449,18453,12955,12387,13346,11461,20190,12847,29876,16905,16971,74205,11938,16785,269523,12306,11928,114584,69253,30960	301	596	12504	1.60311e+15	0.9999578353689929	0.1272744717362948	3.41034e+15
GOTERM_CC_FAT	GO:0005792~microsome	9	234375	0.061808321547308184	19285,68938,26926,18453,74205,12847,11938,269523,11928	301	176	12504	2.12428e+15	0.999999999130348	0.23209380500142163	5.78431e+15
GOTERM_CC_FAT	GO:0042598~vesicular fraction	9	234375	0.07218083306892162	19285,68938,26926,18453,74205,12847,11938,269523,11928	301	182	12504	2.05425e+16	0.9999999999770643	0.25558794141776087	6.37338e+16
GOTERM_CC_FAT	GO:0005626~insoluble fraction	19	4.94792e+15	0.08517218321472715	19285,68938,26926,18453,12955,12387,13346,20190,12847,16905,16971,74205,11938,16785,269523,12306,11928,114584,30960	301	528	12504	1.49487e+16	0.999999999999772	0.2871475190691004	7.00365e+15
GOTERM_CC_FAT	GO:0005624~membrane fraction	16	4.16667e+15	0.24409457362545722	19285,68938,26926,18453,12387,20190,12847,16971,74205,11938,16785,269523,12306,11928,114584,30960	301	510	12504	1.30326e+16	1.0	0.6069225161991123	9.77373e+15
Annotation Cluster 48	Enrichment Score: 1.0852863636070385
Category	Term	Count	%	PValue	Genes	List Total	Pop Hits	Pop Total	Fold Enrichment	Bonferroni	Benjamini	FDR
UP_SEQ_FEATURE	domain:LIM zinc-binding 3	4	1.04167e+16	0.02068587256956985	14201,24131,22793,14199	366	26	16021	6.73434e+15	0.9999999999999974	0.4961754840195439	2.95454e+16
UP_SEQ_FEATURE	domain:LIM zinc-binding 2	4	1.04167e+16	0.10521889068097409	14201,24131,22793,14199	366	50	16021	3.50186e+16	1.0	0.9277305858716598	8.44736e+15
UP_SEQ_FEATURE	domain:LIM zinc-binding 1	4	1.04167e+16	0.10521889068097409	14201,24131,22793,14199	366	50	16021	3.50186e+16	1.0	0.9277305858716598	8.44736e+15
SP_PIR_KEYWORDS	LIM domain	4	1.04167e+16	0.1990642459407566	14201,24131,22793,14199	377	73	17854	2.59496e+15	1.0	0.6037841980639903	9.51465e+15
Annotation Cluster 49	Enrichment Score: 1.0629883397386672
Category	Term	Count	%	PValue	Genes	List Total	Pop Hits	Pop Total	Fold Enrichment	Bonferroni	Benjamini	FDR
SP_PIR_KEYWORDS	threonine protease	3	0.78125	0.07141360529300837	26440,19172,73677	377	21	17854	6.76544e+15	0.9999999999901091	0.28670404345589295	6.35728e+16
GOTERM_CC_FAT	GO:0005839~proteasome core complex	3	0.78125	0.08211122512839845	26440,19172,73677	301	20	12504	6.23123e+15	0.9999999999993202	0.28361412457589963	6.86504e+15
GOTERM_MF_FAT	GO:0004298~threonine-type endopeptidase activity	3	0.78125	0.09770832652937043	26440,19172,73677	337	21	13288	5.6329e+15	1.0	0.5735093997379519	7.71446e+15
GOTERM_MF_FAT	GO:0070003~threonine-type peptidase activity	3	0.78125	0.09770832652937043	26440,19172,73677	337	21	13288	5.6329e+15	1.0	0.5735093997379519	7.71446e+15
Annotation Cluster 50	Enrichment Score: 1.0317255418369422
Category	Term	Count	%	PValue	Genes	List Total	Pop Hits	Pop Total	Fold Enrichment	Bonferroni	Benjamini	FDR
GOTERM_MF_FAT	GO:0051015~actin filament binding	8	2.08333e+15	2.13957e+12	17883,14086,109711,17885,11474,11472,17886,12385	337	49	13288	64375946224187	0.09934794210820008	0.004016384558747865	0.3067050137079974
GOTERM_MF_FAT	GO:0042803~protein homodimerization activity	6	15625	0.5411309569729423	13722,109711,11474,11472,17886,15519	337	193	13288	1.22581e+16	1.0	0.9892713450214399	9.99986e+15
GOTERM_MF_FAT	GO:0042802~identical protein binding	7	1.82292e+16	0.7461907214341119	12468,13722,109711,11474,11472,17886,15519	337	290	13288	0.9517650670213854	1.0	0.9993689761587828	1e+16
GOTERM_MF_FAT	GO:0046983~protein dimerization activity	7	1.82292e+16	0.8642088020927692	20740,13722,109711,11474,11472,17886,15519	337	340	13288	0.8117996159888287	1.0	0.9999574793175398	1e+16
Annotation Cluster 51	Enrichment Score: 1.0094792157970498
Category	Term	Count	%	PValue	Genes	List Total	Pop Hits	Pop Total	Fold Enrichment	Bonferroni	Benjamini	FDR
GOTERM_BP_FAT	GO:0009057~macromolecule catabolic process	26	6.77083e+15	0.010562618923140286	22027,26926,22225,217342,19309,26440,17886,14479,67088,73677,22201,67089,19182,19181,269523,19184,231915,74996,23996,22186,19053,234664,19179,14387,19172,14897	318	654	13588	1.69873e+15	0.9999992877661378	0.15015350058358945	1.59632e+16
GOTERM_BP_FAT	GO:0030163~protein catabolic process	23	5.98958e+15	0.011188985955037372	231915,22027,22225,217342,74996,23996,26440,17886,22186,67088,14479,73677,22201,19053,234664,67089,19179,19182,19181,19172,14897,269523,19184	318	556	13588	1.76759e+16	0.9999996937877569	0.15509235037540237	1.68303e+16
GOTERM_BP_FAT	GO:0006511~ubiquitin-dependent protein catabolic process	9	234375	0.01755396918436027	231915,22027,19053,74996,22225,26440,14479,73677,19184	318	141	13588	2.72742e+16	0.9999999999440886	0.21602154685529718	251776660805322
GOTERM_BP_FAT	GO:0051603~proteolysis involved in cellular protein catabolic process	18	46875	0.1217963680625288	231915,22027,22225,217342,74996,26440,17886,22186,67088,14479,73677,22201,19053,234664,19172,14897,269523,19184	318	534	13588	1.44032e+16	1.0	0.7252746049972502	8.80822e+15
GOTERM_BP_FAT	GO:0044257~cellular protein catabolic process	18	46875	0.12784166122433258	231915,22027,22225,217342,74996,26440,17886,22186,67088,14479,73677,22201,19053,234664,19172,14897,269523,19184	318	537	13588	1.43228e+15	1.0	0.7409199561728492	8.9357e+15
GOTERM_BP_FAT	GO:0044265~cellular macromolecule catabolic process	19	4.94792e+15	0.1800516864428945	231915,26926,22027,22225,217342,74996,26440,17886,22186,67088,14479,73677,22201,19053,234664,19172,14897,269523,19184	318	609	13588	1.33311e+16	1.0	0.8266503355850074	9.61275e+15
GOTERM_BP_FAT	GO:0043632~modification-dependent macromolecule catabolic process	16	4.16667e+15	0.20880098196480307	231915,22027,217342,74996,22225,26440,22186,67088,14479,73677,22201,19053,234664,14897,269523,19184	318	508	13588	1.34581e+16	1.0	0.8631009044963847	9.78417e+15
GOTERM_BP_FAT	GO:0019941~modification-dependent protein catabolic process	16	4.16667e+15	0.20880098196480307	231915,22027,217342,74996,22225,26440,22186,67088,14479,73677,22201,19053,234664,14897,269523,19184	318	508	13588	1.34581e+16	1.0	0.8631009044963847	9.78417e+15
GOTERM_BP_FAT	GO:0006508~proteolysis	26	6.77083e+15	0.4566433569210026	22027,22225,217342,26440,17886,14479,67088,73677,22273,22201,16993,67003,22138,269523,19184,231915,74996,22186,13382,22019,19072,19053,234664,235606,19172,14897	318	1034	13588	1.07444e+16	1.0	0.9879550259518521	9.99954e+15
SP_PIR_KEYWORDS	ubl conjugation pathway	10	2.60417e+15	0.6942629919665262	74996,22225,217342,234664,22186,14479,67088,14897,269523,22201	377	484	17854	0.9784729377205866	1.0	0.978928039145035	1e+16
Annotation Cluster 52	Enrichment Score: 1.0062777311633124
Category	Term	Count	%	PValue	Genes	List Total	Pop Hits	Pop Total	Fold Enrichment	Bonferroni	Benjamini	FDR
GOTERM_MF_FAT	GO:0016417~S-acyltransferase activity	3	0.78125	0.00893964356016202	235339,78920,14104	337	6	13288	1.97151e+15	0.9876134330203036	0.1064861133153	1.20946e+16
GOTERM_MF_FAT	GO:0031406~carboxylic acid binding	5	1.30208e+16	0.16810127626594312	18451,11409,235339,78920,14104	337	85	13288	2.31943e+16	1.0	0.7549310199403765	9.28783e+15
SP_PIR_KEYWORDS	Acyltransferase	4	1.04167e+16	0.6371997441609025	235339,78920,52538,14104	377	155	17854	1.22214e+15	1.0	0.9688065694621547	9.99999e+15
Annotation Cluster 53	Enrichment Score: 0.9311043385846552
Category	Term	Count	%	PValue	Genes	List Total	Pop Hits	Pop Total	Fold Enrichment	Bonferroni	Benjamini	FDR
GOTERM_CC_FAT	GO:0016529~sarcoplasmic reticulum	7	1.82292e+16	1.38474e+12	12321,15464,19309,20190,11938,106393,11937	301	34	12504	855266757865937	0.04427407171433806	0.0011314617370903335	0.18731044446377298
GOTERM_CC_FAT	GO:0016528~sarcoplasm	7	1.82292e+16	1.92629e+11	12321,15464,19309,20190,11938,106393,11937	301	36	12504	8.07752e+15	0.06105262749895102	0.001430699383088152	0.2604768131721058
SP_PIR_KEYWORDS	sarcoplasmic reticulum	4	1.04167e+16	0.0069884609275621176	12321,11938,106393,11937	377	19	17854	9.97012e+15	0.9091407932800702	0.04507638495999666	9.11593e+15
GOTERM_BP_FAT	GO:0019725~cellular homeostasis	16	4.16667e+15	0.01481519967964478	26926,18453,19309,53382,18477,14827,20190,13382,12304,12709,18148,14387,227197,22042,71853,11938	318	343	13588	1.99322e+15	0.9999999977138861	0.1889583913551034	2.16873e+16
GOTERM_BP_FAT	GO:0042592~homeostatic process	21	546875	0.055166204291259326	68938,26926,18453,19309,53382,12387,18477,14827,20190,13382,15464,12304,21399,12709,18148,14387,227197,15482,22042,71853,11938	318	584	13588	1.53651e+16	1.0	0.46759787412799225	6.05208e+15
GOTERM_BP_FAT	GO:0055074~calcium ion homeostasis	4	1.04167e+16	0.3825110253716364	15464,19309,20190,11938	318	95	13588	1.79914e+16	1.0	0.9745789921841543	9.99628e+15
GOTERM_BP_FAT	GO:0055066~di-, tri-valent inorganic cation homeostasis	5	1.30208e+16	0.44447518421401955	15464,19309,20190,22042,11938	318	146	13588	1.46334e+16	1.0	0.9868225100503331	9.99934e+15
GOTERM_BP_FAT	GO:0055065~metal ion homeostasis	4	1.04167e+16	0.45111779743260594	15464,19309,20190,11938	318	106	13588	1.61244e+15	1.0	0.9873431317118089	9.99946e+15
GOTERM_BP_FAT	GO:0050801~ion homeostasis	8	2.08333e+15	0.5268762680916546	15464,12709,19309,20190,227197,13382,22042,11938	318	293	13588	1.16668e+15	1.0	0.993841193991705	9.99995e+15
GOTERM_BP_FAT	GO:0006873~cellular ion homeostasis	7	1.82292e+16	0.5721955481185852	12709,19309,20190,227197,13382,22042,11938	318	261	13588	1.146e+16	1.0	0.9962105921358532	9.99999e+15
GOTERM_BP_FAT	GO:0055082~cellular chemical homeostasis	7	1.82292e+16	0.5981166961557641	12709,19309,20190,227197,13382,22042,11938	318	268	13588	1.11607e+16	1.0	0.9971780015405581	1e+16
GOTERM_BP_FAT	GO:0030005~cellular di-, tri-valent inorganic cation homeostasis	4	1.04167e+16	0.6085064826381141	19309,20190,22042,11938	318	134	13588	1.27551e+16	1.0	0.9973268518635828	1e+16
GOTERM_BP_FAT	GO:0048878~chemical homeostasis	9	234375	0.6213400276609683	68938,15464,12709,19309,20190,227197,13382,22042,11938	318	365	13588	1.05361e+16	1.0	0.9975725724716589	1e+16
GOTERM_BP_FAT	GO:0055080~cation homeostasis	5	1.30208e+16	0.6258446656035868	15464,19309,20190,22042,11938	318	184	13588	1.16113e+16	1.0	0.997615929638417	999999898279819
GOTERM_BP_FAT	GO:0006874~cellular calcium ion homeostasis	3	0.78125	0.63057354838761	19309,20190,11938	318	91	13588	140866680489322	1.0	0.9977323683139685	1e+16
GOTERM_BP_FAT	GO:0006875~cellular metal ion homeostasis	3	0.78125	0.6813331270974694	19309,20190,11938	318	100	13588	128188679245283	1.0	0.998559293252291	1e+16
GOTERM_BP_FAT	GO:0030003~cellular cation homeostasis	4	1.04167e+16	0.6924638020940966	19309,20190,22042,11938	318	152	13588	1.12446e+16	1.0	0.9987549891252092	999999995900607
Annotation Cluster 54	Enrichment Score: 0.8305907607902838
Category	Term	Count	%	PValue	Genes	List Total	Pop Hits	Pop Total	Fold Enrichment	Bonferroni	Benjamini	FDR
GOTERM_BP_FAT	GO:0009156~ribonucleoside monophosphate biosynthetic process	3	0.78125	0.058601865133773176	100046995,237823,19139	318	17	13588	7.54051e+15	1.0	0.4830584711391832	6.28073e+16
GOTERM_BP_FAT	GO:0009161~ribonucleoside monophosphate metabolic process	3	0.78125	0.07149091582362024	100046995,237823,19139	318	19	13588	6.74677e+15	1.0	0.5437551292628673	703244453042486
GOTERM_BP_FAT	GO:0009124~nucleoside monophosphate biosynthetic process	3	0.78125	0.28277985486696205	100046995,237823,19139	318	45	13588	2.84864e+15	1.0	0.9317901647542348	9.95676e+15
GOTERM_BP_FAT	GO:0009123~nucleoside monophosphate metabolic process	3	0.78125	0.401815041831441	100046995,237823,19139	318	59	13588	2.17269e+16	1.0	0.9795928470817922	9.99779e+15
Annotation Cluster 55	Enrichment Score: 0.8108457184482395
Category	Term	Count	%	PValue	Genes	List Total	Pop Hits	Pop Total	Fold Enrichment	Bonferroni	Benjamini	FDR
GOTERM_BP_FAT	GO:0009408~response to heat	4	1.04167e+16	0.037891018161372754	226101,12955,15482,69253	318	32	13588	5.34119e+15	1.0	0.36597591207705216	4.68815e+15
GOTERM_BP_FAT	GO:0009266~response to temperature stimulus	4	1.04167e+16	0.1158867415296081	226101,12955,15482,69253	318	51	13588	3.35134e+16	1.0	0.7090137646467596	8.66985e+15
GOTERM_BP_FAT	GO:0009628~response to abiotic stimulus	5	1.30208e+16	0.8411875140473459	226101,12955,232087,15482,69253	318	251	13588	0.8511864491718659	1.0	0.9999256574716339	1e+16
Annotation Cluster 56	Enrichment Score: 0.7684714750479524
Category	Term	Count	%	PValue	Genes	List Total	Pop Hits	Pop Total	Fold Enrichment	Bonferroni	Benjamini	FDR
GOTERM_BP_FAT	GO:0006769~nicotinamide metabolic process	3	0.78125	0.10705563304175741	17449,21991,66171	318	24	13588	5.34119e+15	1.0	0.6868438228848116	8.4347e+15
GOTERM_BP_FAT	GO:0046496~nicotinamide nucleotide metabolic process	3	0.78125	0.10705563304175741	17449,21991,66171	318	24	13588	5.34119e+15	1.0	0.6868438228848116	8.4347e+15
GOTERM_BP_FAT	GO:0009820~alkaloid metabolic process	3	0.78125	0.10705563304175741	17449,21991,66171	318	24	13588	5.34119e+15	1.0	0.6868438228848116	8.4347e+15
GOTERM_BP_FAT	GO:0019362~pyridine nucleotide metabolic process	3	0.78125	0.13816510048017028	17449,21991,66171	318	28	13588	4.57817e+15	1.0	0.7646680036065303	9.12427e+15
GOTERM_BP_FAT	GO:0006733~oxidoreduction coenzyme metabolic process	3	0.78125	0.22200564653741145	17449,21991,66171	318	38	13588	3.37339e+16	1.0	0.8781052747258972	983616653314113
GOTERM_BP_FAT	GO:0043603~cellular amide metabolic process	3	0.78125	0.23065114467398548	17449,21991,66171	318	39	13588	3.28689e+16	1.0	0.8874709006939355	9.86357e+15
GOTERM_BP_FAT	GO:0019748~secondary metabolic process	3	0.78125	0.4810088987791593	17449,21991,66171	318	69	13588	1.85781e+16	1.0	0.9906768566288273	9.99978e+15
Annotation Cluster 57	Enrichment Score: 0.7566069075933683
Category	Term	Count	%	PValue	Genes	List Total	Pop Hits	Pop Total	Fold Enrichment	Bonferroni	Benjamini	FDR
GOTERM_MF_FAT	GO:0019842~vitamin binding	8	2.08333e+15	0.03390821466952665	216136,18451,108037,11657,19309,239017,14104,18293	337	121	13288	2.60696e+16	0.9999999527945242	0.2725997581510782	3.90556e+15
GOTERM_MF_FAT	GO:0070279~vitamin B6 binding	3	0.78125	0.39804958606170904	108037,11657,19309	337	54	13288	2.19057e+15	1.0	0.9567975133525018	9.99315e+15
GOTERM_MF_FAT	GO:0030170~pyridoxal phosphate binding	3	0.78125	0.39804958606170904	108037,11657,19309	337	54	13288	2.19057e+15	1.0	0.9567975133525018	9.99315e+15
Annotation Cluster 58	Enrichment Score: 0.6647711828734332
Category	Term	Count	%	PValue	Genes	List Total	Pop Hits	Pop Total	Fold Enrichment	Bonferroni	Benjamini	FDR
GOTERM_BP_FAT	GO:0006937~regulation of muscle contraction	5	1.30208e+16	0.014934948991151227	11749,20190,11938,11937,11928	318	41	13588	5.21092e+15	0.9999999980558648	0.18855784246749663	2.1843e+16
GOTERM_BP_FAT	GO:0044057~regulation of system process	11	2.86458e+15	0.019645754289089074	18747,15464,11749,22003,14387,20190,22628,11938,11937,11928,21956	318	201	13588	2.33843e+16	0.9999999999967373	0.22840735034921245	2.77446e+16
GOTERM_BP_FAT	GO:0006816~calcium ion transport	4	1.04167e+16	0.5391360188010653	11749,20190,11938,11937	318	121	13588	1.41255e+16	1.0	0.9944224340148253	9.99997e+15
GOTERM_BP_FAT	GO:0015674~di-, tri-valent inorganic cation transport	4	1.04167e+16	0.7290568459215208	11749,20190,11938,11937	318	161	13588	1.0616e+16	1.0	0.9993337438250081	1e+16
GOTERM_MF_FAT	GO:0046873~metal ion transmembrane transporter activity	5	1.30208e+16	0.9383734760269851	14977,20190,22042,11938,11937	337	290	13288	0.679832190729561	1.0	0.9999976891318922	100.0
GOTERM_BP_FAT	GO:0030001~metal ion transport	7	1.82292e+16	0.9485603953433497	14228,11749,14977,20190,11938,11937,11928	318	442	13588	0.6767124847036057	1.0	0.99999746236539	100.0
Annotation Cluster 59	Enrichment Score: 0.639512525387139
Category	Term	Count	%	PValue	Genes	List Total	Pop Hits	Pop Total	Fold Enrichment	Bonferroni	Benjamini	FDR
GOTERM_MF_FAT	GO:0005543~phospholipid binding	7	1.82292e+16	0.08132934832596717	17913,11749,170625,16332,56440,434246,12306	337	119	13288	2.31943e+16	1.0	0.5232326778929905	7.04099e+15
GOTERM_MF_FAT	GO:0035091~phosphoinositide binding	4	1.04167e+16	0.29484447507343026	170625,16332,56440,12306	337	75	13288	2.10295e+16	1.0	0.9005853693577581	9.93361e+15
GOTERM_MF_FAT	GO:0008289~lipid binding	10	2.60417e+15	0.5030627229891641	17913,11657,11749,170625,11409,16332,56440,434246,12306,269523	337	345	13288	1.14291e+15	1.0	0.9845502885197988	9.99956e+15
Annotation Cluster 60	Enrichment Score: 0.6282290521437889
Category	Term	Count	%	PValue	Genes	List Total	Pop Hits	Pop Total	Fold Enrichment	Bonferroni	Benjamini	FDR
GOTERM_BP_FAT	GO:0006937~regulation of muscle contraction	5	1.30208e+16	0.014934948991151227	11749,20190,11938,11937,11928	318	41	13588	5.21092e+15	0.9999999980558648	0.18855784246749663	2.1843e+16
UP_SEQ_FEATURE	active site:4-aspartylphosphate intermediate	3	0.78125	0.17286493699042285	11938,11937,11928	366	33	16021	3.97938e+16	1.0	0.9828628866552207	9.584e+15
GOTERM_MF_FAT	GO:0015662~ATPase activity, coupled to transmembrane movement of ions, phosphorylative mechanism	4	1.04167e+16	0.17447093674231645	11947,11938,11937,11928	337	57	13288	2.76704e+15	1.0	0.7584191300748178	9.36223e+15
GOTERM_BP_FAT	GO:0051241~negative regulation of multicellular organismal process	4	1.04167e+16	0.4140150406915447	11938,12306,11937,11928	318	100	13588	1.70918e+15	1.0	0.9821377587839546	9.99842e+15
GOTERM_BP_FAT	GO:0030001~metal ion transport	7	1.82292e+16	0.9485603953433497	14228,11749,14977,20190,11938,11937,11928	318	442	13588	0.6767124847036057	1.0	0.99999746236539	100.0
UP_SEQ_FEATURE	topological domain:Lumenal	6	15625	0.9614148628591787	107513,20014,103963,11938,11937,11928	366	414	16021	0.6343945513582008	1.0	1.0	100.0
Annotation Cluster 61	Enrichment Score: 0.6106684661699123
Category	Term	Count	%	PValue	Genes	List Total	Pop Hits	Pop Total	Fold Enrichment	Bonferroni	Benjamini	FDR
SP_PIR_KEYWORDS	fatty acid metabolism	4	1.04167e+16	0.1373178632523162	11370,11409,52538,74205	377	61	17854	3.10545e+15	1.0	0.46818302810931733	8.66445e+15
GOTERM_BP_FAT	GO:0006631~fatty acid metabolic process	8	2.08333e+15	0.13935045498472173	11370,16993,11409,21991,52538,74205,14104,105787	318	184	13588	1.85781e+15	1.0	0.7653285482504613	9.14379e+15
SP_PIR_KEYWORDS	lipid metabolism	5	1.30208e+16	0.32188700285045513	11370,110611,11409,52538,74205	377	136	17854	1.74111e+15	1.0	0.7714675581743436	9.9498e+15
COG_ONTOLOGY	Lipid metabolism	3	0.78125	0.5858511223355626	11370,11409,74205	47	86	2040	1.5141e+16	0.9999956329230674	0.9152698122881527	9.97492e+15
Annotation Cluster 62	Enrichment Score: 0.590378098294811
Category	Term	Count	%	PValue	Genes	List Total	Pop Hits	Pop Total	Fold Enrichment	Bonferroni	Benjamini	FDR
UP_SEQ_FEATURE	metal ion-binding site:Manganese	4	1.04167e+16	0.03291474927632708	19053,19046,19045,74551	366	31	16021	5.64816e+15	1.0	0.59811714901528	4.29206e+16
SP_PIR_KEYWORDS	manganese	7	1.82292e+16	0.08642523586508702	19053,67834,269951,15926,19046,19045,74551	377	145	17854	2.28625e+15	0.9999999999999625	0.33066643915706306	7.0829e+15
UP_SEQ_FEATURE	metal ion-binding site:Iron	4	1.04167e+16	0.0913719323501984	18451,19053,19046,19045	366	47	16021	3.72538e+16	1.0	0.9064211856160622	7.99179e+15
UP_SEQ_FEATURE	active site:Proton donor	8	2.08333e+15	0.10111427240709166	16993,236539,19053,76952,13808,100044223,19046,19045	366	173	16021	2.0242e+16	1.0	0.9253938980006472	8.32362e+15
GOTERM_MF_FAT	GO:0030145~manganese ion binding	7	1.82292e+16	0.17259907461503032	19053,67834,269951,15926,19046,19045,74551	337	148	13288	186494506375812	1.0	0.7595796884207494	9.34116e+15
SP_PIR_KEYWORDS	iron	7	1.82292e+16	0.6723473712823059	18451,19053,11429,66445,227197,19046,19045	377	321	17854	1.03273e+15	1.0	0.9753971651684986	1e+16
SP_PIR_KEYWORDS	protein phosphatase	3	0.78125	0.7225398181047242	19053,19046,19045	377	120	17854	1.18395e+16	1.0	0.9833917594621061	999999974239513
GOTERM_MF_FAT	GO:0016791~phosphatase activity	6	15625	0.7232078058963431	19053,16332,76952,19046,19045,11928	337	238	13288	0.9940403461087699	1.0	0.9992053968068179	1e+16
GOTERM_MF_FAT	GO:0005506~iron ion binding	7	1.82292e+16	0.8695563031262076	18451,19053,11429,66445,227197,19046,19045	337	343	13288	0.8046993278023375	1.0	0.9999572706571177	1e+16
GOTERM_MF_FAT	GO:0004721~phosphoprotein phosphatase activity	3	0.78125	0.9005500394039259	19053,19046,19045	337	152	13288	0.7782289551772607	1.0	0.9999859777280581	1e+16
Annotation Cluster 63	Enrichment Score: 0.5826349794919427
Category	Term	Count	%	PValue	Genes	List Total	Pop Hits	Pop Total	Fold Enrichment	Bonferroni	Benjamini	FDR
GOTERM_BP_FAT	GO:0016053~organic acid biosynthetic process	7	1.82292e+16	0.1123510619487065	27053,16993,236539,232087,21991,14104,105787	318	141	13588	2.12133e+15	1.0	0.7026109578432743	8.57999e+15
GOTERM_BP_FAT	GO:0046394~carboxylic acid biosynthetic process	7	1.82292e+16	0.1123510619487065	27053,16993,236539,232087,21991,14104,105787	318	141	13588	2.12133e+15	1.0	0.7026109578432743	8.57999e+15
GOTERM_BP_FAT	GO:0006631~fatty acid metabolic process	8	2.08333e+15	0.13935045498472173	11370,16993,11409,21991,52538,74205,14104,105787	318	184	13588	1.85781e+15	1.0	0.7653285482504613	9.14379e+15
SP_PIR_KEYWORDS	Fatty acid biosynthesis	3	0.78125	0.2525829195708139	21991,14104,105787	377	46	17854	3.08857e+15	1.0	0.6858099202605866	9.8109e+15
GOTERM_BP_FAT	GO:0008652~cellular amino acid biosynthetic process	3	0.78125	0.2740872291744952	27053,236539,232087	318	44	13588	2.91338e+15	1.0	0.9259948544434491	9.94733e+15
GOTERM_BP_FAT	GO:0006633~fatty acid biosynthetic process	4	1.04167e+16	0.2930182090812834	16993,21991,14104,105787	318	81	13588	2.1101e+16	1.0	0.9371983481273013	996583395494585
SP_PIR_KEYWORDS	lipid synthesis	4	1.04167e+16	0.3465765407087102	104112,21991,14104,105787	377	99	17854	1.91346e+16	1.0	0.7944078782900138	9.96972e+15
GOTERM_BP_FAT	GO:0009309~amine biosynthetic process	3	0.78125	0.510849637348165	27053,236539,232087	318	73	13588	1.75601e+16	1.0	0.9928375668419283	9.99992e+15
GOTERM_BP_FAT	GO:0008610~lipid biosynthetic process	5	1.30208e+16	0.9031144456558089	16993,104112,21991,14104,105787	318	285	13588	0.7496413990952223	1.0	0.9999850765623693	100.0
Annotation Cluster 64	Enrichment Score: 0.5619118134030461
Category	Term	Count	%	PValue	Genes	List Total	Pop Hits	Pop Total	Fold Enrichment	Bonferroni	Benjamini	FDR
UP_SEQ_FEATURE	metal ion-binding site:Calcium 2; via carbonyl oxygen	3	0.78125	0.20596898360000707	16971,11938,11937	366	37	16021	3.54918e+16	1.0	0.992377637455348	9.79016e+15
UP_SEQ_FEATURE	metal ion-binding site:Calcium 1	3	0.78125	0.2736095775974219	16971,11938,11937	366	45	16021	2.91821e+16	1.0	0.9986204155918682	9.95279e+15
UP_SEQ_FEATURE	metal ion-binding site:Calcium 2	3	0.78125	0.3658739072053738	16971,11938,11937	366	56	16021	2.34499e+16	1.0	0.9997988849810425	999515062940268
Annotation Cluster 65	Enrichment Score: 0.5156372948349521
Category	Term	Count	%	PValue	Genes	List Total	Pop Hits	Pop Total	Fold Enrichment	Bonferroni	Benjamini	FDR
GOTERM_MF_FAT	GO:0005080~protein kinase C binding	3	0.78125	0.030154742902524793	24131,14694,22628	337	11	13288	1.07537e+16	0.9999996855900878	0.25441025490084024	3.55669e+15
GOTERM_MF_FAT	GO:0019901~protein kinase binding	3	0.78125	0.5394253335013482	24131,14694,22628	337	71	13288	1.66607e+16	1.0	0.9896173094253403	9.99985e+15
GOTERM_MF_FAT	GO:0019900~kinase binding	3	0.78125	0.6375013794777808	24131,14694,22628	337	85	13288	1.39166e+16	1.0	0.9970844841822708	1e+16
GOTERM_MF_FAT	GO:0019899~enzyme binding	5	1.30208e+16	0.8349927852688195	24131,12387,14694,22628,15526	337	229	13288	0.8609228616225882	1.0	0.9998966868583885	1e+16
Annotation Cluster 66	Enrichment Score: 0.46690306665342596
Category	Term	Count	%	PValue	Genes	List Total	Pop Hits	Pop Total	Fold Enrichment	Bonferroni	Benjamini	FDR
GOTERM_BP_FAT	GO:0030199~collagen fibril organization	3	0.78125	0.08519438983489137	18451,12406,12306	318	21	13588	6.10422e+15	1.0	0.6043821236534657	7.67384e+15
GOTERM_BP_FAT	GO:0043062~extracellular structure organization	4	1.04167e+16	0.6794716501818866	18451,12406,12387,12306	318	149	13588	1.1471e+16	1.0	0.9985921015876498	1e+16
GOTERM_BP_FAT	GO:0030198~extracellular matrix organization	3	0.78125	0.6866073718451077	18451,12406,12306	318	101	13588	1.26919e+15	1.0	0.9986528101587627	1e+16
Annotation Cluster 67	Enrichment Score: 0.4285108321448
Category	Term	Count	%	PValue	Genes	List Total	Pop Hits	Pop Total	Fold Enrichment	Bonferroni	Benjamini	FDR
GOTERM_MF_FAT	GO:0016790~thiolester hydrolase activity	6	15625	0.13844843328464446	231915,13885,74996,22225,14479,14104	337	108	13288	2.19057e+15	1.0	0.6971767267192314	8.82256e+15
GOTERM_MF_FAT	GO:0004221~ubiquitin thiolesterase activity	4	1.04167e+16	0.26723167231640077	231915,74996,22225,14479	337	71	13288	2.22142e+16	1.0	0.8789684020853605	9.88477e+15
GOTERM_MF_FAT	GO:0008234~cysteine-type peptidase activity	4	1.04167e+16	0.7184219944765519	74996,22225,22138,14479	337	146	13288	1.08028e+16	1.0	0.9991939439044111	1e+16
SP_PIR_KEYWORDS	thiol protease	3	0.78125	0.7267768355348118	74996,22225,14479	377	121	17854	1.17417e+15	1.0	0.9835699530715912	1e+16
Annotation Cluster 68	Enrichment Score: 0.41285943386393825
Category	Term	Count	%	PValue	Genes	List Total	Pop Hits	Pop Total	Fold Enrichment	Bonferroni	Benjamini	FDR
GOTERM_BP_FAT	GO:0001704~formation of primary germ layer	3	0.78125	0.23931786774379615	18747,11426,12387	318	40	13588	3.20472e+15	1.0	0.8961463771393227	9.88667e+15
GOTERM_BP_FAT	GO:0007369~gastrulation	4	1.04167e+16	0.24866145511763252	18747,11426,12387,13382	318	74	13588	2.30971e+15	1.0	0.9048679543897467	9.90744e+15
GOTERM_BP_FAT	GO:0048598~embryonic morphogenesis	5	1.30208e+16	0.9701482462581257	22323,18747,11426,12387,13382	318	359	13588	0.5951192165519175	1.0	0.9999995560886159	100.0
Annotation Cluster 69	Enrichment Score: 0.3604754843732795
Category	Term	Count	%	PValue	Genes	List Total	Pop Hits	Pop Total	Fold Enrichment	Bonferroni	Benjamini	FDR
GOTERM_BP_FAT	GO:0043413~biopolymer glycosylation	4	1.04167e+16	0.3570415058145871	20014,103963,19089,320011	318	91	13588	1.87822e+16	1.0	0.9686722958814473	9.99278e+15
GOTERM_BP_FAT	GO:0070085~glycosylation	4	1.04167e+16	0.3570415058145871	20014,103963,19089,320011	318	91	13588	1.87822e+16	1.0	0.9686722958814473	9.99278e+15
GOTERM_BP_FAT	GO:0006486~protein amino acid glycosylation	4	1.04167e+16	0.3570415058145871	20014,103963,19089,320011	318	91	13588	1.87822e+16	1.0	0.9686722958814473	9.99278e+15
GOTERM_BP_FAT	GO:0009101~glycoprotein biosynthetic process	4	1.04167e+16	0.5164293635572064	20014,103963,19089,320011	318	117	13588	1.46084e+15	1.0	0.9932098114737907	999993207074876
GOTERM_BP_FAT	GO:0009100~glycoprotein metabolic process	4	1.04167e+16	0.6705876238704693	20014,103963,19089,320011	318	147	13588	1.16271e+15	1.0	0.9984847976883057	1e+16
Annotation Cluster 70	Enrichment Score: 0.34349299430956154
Category	Term	Count	%	PValue	Genes	List Total	Pop Hits	Pop Total	Fold Enrichment	Bonferroni	Benjamini	FDR
SP_PIR_KEYWORDS	Spliceosome	5	1.30208e+16	0.20643783913592448	15387,76936,98758,101943,53607	377	111	17854	2.13325e+15	1.0	0.6143217705242647	9.57213e+15
UP_SEQ_FEATURE	domain:RRM 2	4	1.04167e+16	0.3246305072622244	76936,98758,53607,11991	366	88	16021	1.98969e+16	1.0	0.999623371085491	9.98606e+15
UP_SEQ_FEATURE	domain:RRM 1	4	1.04167e+16	0.3246305072622244	76936,98758,53607,11991	366	88	16021	1.98969e+16	1.0	0.999623371085491	9.98606e+15
GOTERM_CC_FAT	GO:0005681~spliceosome	5	1.30208e+16	0.34704138348780966	15387,76936,98758,101943,53607	301	124	12504	1.67506e+16	1.0	0.7382071460076318	9.96882e+15
GOTERM_BP_FAT	GO:0008380~RNA splicing	6	15625	0.5050533964881816	15387,76936,27374,98758,101943,53607	318	201	13588	1.27551e+16	1.0	0.99242456284699	9.9999e+15
GOTERM_BP_FAT	GO:0016071~mRNA metabolic process	8	2.08333e+15	0.560595734214904	15387,23983,76936,27374,98758,101943,53607,11991	318	302	13588	1.13191e+16	1.0	0.9958342773519363	9.99999e+15
SP_PIR_KEYWORDS	mrna splicing	5	1.30208e+16	0.5740680022972539	15387,76936,98758,101943,53607	377	191	17854	1.23974e+16	1.0	0.9475749196265594	9.99991e+15
GOTERM_BP_FAT	GO:0006397~mRNA processing	7	1.82292e+16	0.5759484226397386	15387,23983,76936,27374,98758,101943,53607	318	262	13588	1.14163e+15	1.0	0.9963234812386503	9.99999e+15
GOTERM_BP_FAT	GO:0006396~RNA processing	10	2.60417e+15	0.6953821264649305	83701,15387,23983,76936,27374,19896,20823,98758,101943,53607	318	437	13588	0.9777931292546379	1.0	0.9987863515664147	1e+16
SP_PIR_KEYWORDS	mrna processing	5	1.30208e+16	0.7474175363164758	15387,76936,98758,101943,53607	377	240	17854	0.9866268788682582	1.0	0.9861318922796921	1e+16
Annotation Cluster 71	Enrichment Score: 0.33650931556638414
Category	Term	Count	%	PValue	Genes	List Total	Pop Hits	Pop Total	Fold Enrichment	Bonferroni	Benjamini	FDR
GOTERM_BP_FAT	GO:0010608~posttranscriptional regulation of gene expression	6	15625	0.26384273985600276	83701,14359,13665,208643,19045,11991	318	148	13588	1.73228e+16	1.0	0.9183235244731041	9.93374e+15
GOTERM_BP_FAT	GO:0006417~regulation of translation	4	1.04167e+16	0.4140150406915447	14359,13665,208643,19045	318	100	13588	1.70918e+15	1.0	0.9821377587839546	9.99842e+15
GOTERM_BP_FAT	GO:0032268~regulation of cellular protein metabolic process	5	1.30208e+16	0.8955931975495814	14359,13665,22627,208643,19045	318	280	13588	0.7630278526504942	1.0	0.9999810393276516	1e+16
Annotation Cluster 72	Enrichment Score: 0.327128798324117
Category	Term	Count	%	PValue	Genes	List Total	Pop Hits	Pop Total	Fold Enrichment	Bonferroni	Benjamini	FDR
UP_SEQ_FEATURE	domain:Fibronectin type-III 5	3	0.78125	0.21435357752634257	242702,22138,14268	366	38	16021	3.45578e+15	1.0	0.9934930608217699	9.82435e+15
UP_SEQ_FEATURE	domain:Fibronectin type-III 4	3	0.78125	0.3658739072053738	242702,22138,14268	366	56	16021	2.34499e+16	1.0	0.9997988849810425	999515062940268
UP_SEQ_FEATURE	domain:Fibronectin type-III 3	3	0.78125	0.5053214340550567	242702,22138,14268	366	74	16021	1.77459e+16	1.0	0.9999977418070782	999992436145874
UP_SEQ_FEATURE	domain:Fibronectin type-III 2	3	0.78125	0.7621154234181604	242702,22138,14268	366	120	16021	1.09433e+16	1.0	0.9999999999717679	1e+16
UP_SEQ_FEATURE	domain:Fibronectin type-III 1	3	0.78125	0.7661351059704851	242702,22138,14268	366	121	16021	1.08529e+16	1.0	0.9999999999726639	1e+16
Annotation Cluster 73	Enrichment Score: 0.3238750143538326
Category	Term	Count	%	PValue	Genes	List Total	Pop Hits	Pop Total	Fold Enrichment	Bonferroni	Benjamini	FDR
GOTERM_BP_FAT	GO:0032989~cellular component morphogenesis	12	3125	0.19920411792469545	22323,11426,12387,11464,668829,17886,12385,22138,21849,11459,21956,68016	318	351	13588	1.46084e+15	1.0	0.8501673651857667	9.73705e+15
GOTERM_BP_FAT	GO:0000902~cell morphogenesis	7	1.82292e+16	0.7313294615309883	22323,11426,12387,668829,17886,12385,21849	318	309	13588	0.9679835541715006	1.0	0.9993242391864627	1e+16
GOTERM_BP_FAT	GO:0000904~cell morphogenesis involved in differentiation	5	1.30208e+16	0.7327630738339328	22323,12387,668829,17886,21849	318	212	13588	1.00777e+16	1.0	0.9993237684948595	999999999589172
Annotation Cluster 74	Enrichment Score: 0.2660384656139927
Category	Term	Count	%	PValue	Genes	List Total	Pop Hits	Pop Total	Fold Enrichment	Bonferroni	Benjamini	FDR
GOTERM_BP_FAT	GO:0009991~response to extracellular stimulus	5	1.30208e+16	0.37613882412125	16828,11657,11409,22321,114584	318	133	13588	1.60637e+16	1.0	0.9736299306786361	9.9956e+15
GOTERM_BP_FAT	GO:0031667~response to nutrient levels	4	1.04167e+16	0.5048547700130253	11657,11409,22321,114584	318	115	13588	1.48625e+16	1.0	0.992595065322007	9.9999e+15
GOTERM_BP_FAT	GO:0010033~response to organic substance	10	2.60417e+15	0.8382430796245628	83701,11657,11409,19309,22321,232087,16332,15184,15519,114584	318	505	13588	0.8461298960084688	1.0	0.9999211950805521	1e+16
Annotation Cluster 75	Enrichment Score: 0.2428105281310304
Category	Term	Count	%	PValue	Genes	List Total	Pop Hits	Pop Total	Fold Enrichment	Bonferroni	Benjamini	FDR
GOTERM_BP_FAT	GO:0001701~in utero embryonic development	8	2.08333e+15	0.4315332216966999	18803,23996,22003,19182,17886,22138,100044223,15469	318	267	13588	1.28029e+16	1.0	0.9850958705456954	9.99904e+15
GOTERM_BP_FAT	GO:0043009~chordate embryonic development	10	2.60417e+15	0.6525976529593219	22323,18803,236539,23996,22003,19182,17886,22138,100044223,15469	318	421	13588	1.01495e+16	1.0	0.9982504427097934	1e+16
GOTERM_BP_FAT	GO:0009792~embryonic development ending in birth or egg hatching	10	2.60417e+15	0.6636035069283255	22323,18803,236539,23996,22003,19182,17886,22138,100044223,15469	318	425	13588	1.0054e+16	1.0	0.998380947084993	1e+16
Annotation Cluster 76	Enrichment Score: 0.22318772350385066
Category	Term	Count	%	PValue	Genes	List Total	Pop Hits	Pop Total	Fold Enrichment	Bonferroni	Benjamini	FDR
SP_PIR_KEYWORDS	Endocytosis	4	1.04167e+16	0.31193094353870077	16971,30948,22042,23970	377	93	17854	2.03691e+15	1.0	0.7622781294331888	9.93877e+15
GOTERM_BP_FAT	GO:0016044~membrane organization	7	1.82292e+16	0.6125489974738718	16971,26903,30948,22042,434246,23970,16905	318	272	13588	1.09966e+16	1.0	0.9972772113988547	1e+16
GOTERM_BP_FAT	GO:0010324~membrane invagination	4	1.04167e+16	0.8185117285320374	16971,30948,22042,23970	318	188	13588	0.9091395691154824	1.0	0.9998664428321313	1e+16
GOTERM_BP_FAT	GO:0006897~endocytosis	4	1.04167e+16	0.8185117285320374	16971,30948,22042,23970	318	188	13588	0.9091395691154824	1.0	0.9998664428321313	1e+16
Annotation Cluster 77	Enrichment Score: 0.21340699851359848
Category	Term	Count	%	PValue	Genes	List Total	Pop Hits	Pop Total	Fold Enrichment	Bonferroni	Benjamini	FDR
GOTERM_CC_FAT	GO:0005741~mitochondrial outer membrane	3	0.78125	0.5756978860364391	26926,11739,74205	301	80	12504	1.55781e+16	1.0	0.9236119213536245	9.99991e+15
GOTERM_CC_FAT	GO:0031968~organelle outer membrane	3	0.78125	0.6215057212919808	26926,11739,74205	301	87	12504	1.43247e+16	1.0	0.9428540362007002	9.99998e+15
GOTERM_CC_FAT	GO:0019867~outer membrane	3	0.78125	0.6399399732630044	26926,11739,74205	301	90	12504	1.38472e+16	1.0	0.9479722125568985	999999013780328
Annotation Cluster 78	Enrichment Score: 0.20933862475380507
Category	Term	Count	%	PValue	Genes	List Total	Pop Hits	Pop Total	Fold Enrichment	Bonferroni	Benjamini	FDR
GOTERM_BP_FAT	GO:0006865~amino acid transport	3	0.78125	0.4960694151435655	78830,11739,20539	318	71	13588	1.80547e+16	1.0	0.9918361387764235	9.99987e+15
GOTERM_BP_FAT	GO:0015837~amine transport	3	0.78125	0.6365101752784634	78830,11739,20539	318	92	13588	1.39336e+16	1.0	0.9978873734201944	999999936656286
GOTERM_BP_FAT	GO:0046942~carboxylic acid transport	3	0.78125	0.6759867653706577	78830,11739,20539	318	99	13588	1.29484e+16	1.0	0.9985841899142609	1e+16
GOTERM_BP_FAT	GO:0015849~organic acid transport	3	0.78125	0.6813331270974694	78830,11739,20539	318	100	13588	128188679245283	1.0	0.998559293252291	1e+16
Annotation Cluster 79	Enrichment Score: 0.20451972914665545
Category	Term	Count	%	PValue	Genes	List Total	Pop Hits	Pop Total	Fold Enrichment	Bonferroni	Benjamini	FDR
GOTERM_BP_FAT	GO:0008217~regulation of blood pressure	3	0.78125	0.45007836968910536	11475,22003,11928	318	65	13588	1.97213e+15	1.0	0.9874709709916364	9.99944e+15
GOTERM_BP_FAT	GO:0008015~blood circulation	3	0.78125	0.735489260207669	11475,22003,11928	318	111	13588	1.15485e+16	1.0	0.9993413343577	1e+16
GOTERM_BP_FAT	GO:0003013~circulatory system process	3	0.78125	0.735489260207669	11475,22003,11928	318	111	13588	1.15485e+16	1.0	0.9993413343577	1e+16
Annotation Cluster 80	Enrichment Score: 0.1967207750219927
Category	Term	Count	%	PValue	Genes	List Total	Pop Hits	Pop Total	Fold Enrichment	Bonferroni	Benjamini	FDR
GOTERM_CC_FAT	GO:0005789~endoplasmic reticulum membrane	5	1.30208e+16	0.4971632534766342	15464,20014,103963,20190,11937	301	152	12504	1.3665e+15	1.0	0.8824673859258166	9.99909e+15
GOTERM_CC_FAT	GO:0042175~nuclear envelope-endoplasmic reticulum network	5	1.30208e+16	0.5375610849068586	15464,20014,103963,20190,11937	301	160	12504	1.29817e+16	1.0	0.9052932086208714	9.99971e+15
UP_SEQ_FEATURE	topological domain:Lumenal	6	15625	0.9614148628591787	107513,20014,103963,11938,11937,11928	366	414	16021	0.6343945513582008	1.0	1.0	100.0
Annotation Cluster 81	Enrichment Score: 0.1925719378929798
Category	Term	Count	%	PValue	Genes	List Total	Pop Hits	Pop Total	Fold Enrichment	Bonferroni	Benjamini	FDR
GOTERM_BP_FAT	GO:0030850~prostate gland development	3	0.78125	0.23065114467398548	14228,12387,70465	318	39	13588	3.28689e+16	1.0	0.8874709006939355	9.86357e+15
GOTERM_BP_FAT	GO:0050678~regulation of epithelial cell proliferation	3	0.78125	0.43422759787454407	12034,12387,70465	318	63	13588	2.03474e+15	1.0	0.985270947669074	9.99911e+15
GOTERM_BP_FAT	GO:0048608~reproductive structure development	3	0.78125	0.8106063341636028	14228,12387,70465	318	130	13588	0.986066763425254	1.0	0.9998441878343272	1e+16
GOTERM_BP_FAT	GO:0048732~gland development	4	1.04167e+16	0.8421740686065398	14228,12034,12387,70465	318	197	13588	0.8676052740797497	1.0	0.9999253121393264	1e+16
GOTERM_BP_FAT	GO:0001655~urogenital system development	3	0.78125	0.8584868855024416	14228,12387,70465	318	146	13588	0.8780046523649521	1.0	0.9999484573650591	1e+16
GOTERM_BP_FAT	GO:0003006~reproductive developmental process	5	1.30208e+16	0.8679988058801748	14228,12034,12387,70465,13382	318	264	13588	0.8092719649323423	1.0	0.9999593110266872	999999999999996
GOTERM_BP_FAT	GO:0060429~epithelium development	5	1.30208e+16	0.8807623621735301	22323,12034,12387,16664,70465	318	271	13588	0.7883682610411009	1.0	0.9999713552964582	1e+16
Annotation Cluster 82	Enrichment Score: 0.1704893665968433
Category	Term	Count	%	PValue	Genes	List Total	Pop Hits	Pop Total	Fold Enrichment	Bonferroni	Benjamini	FDR
GOTERM_BP_FAT	GO:0006508~proteolysis	26	6.77083e+15	0.4566433569210026	22027,22225,217342,26440,17886,14479,67088,73677,22273,22201,16993,67003,22138,269523,19184,231915,74996,22186,13382,22019,19072,19053,234664,235606,19172,14897	318	1034	13588	1.07444e+16	1.0	0.9879550259518521	9.99954e+15
GOTERM_MF_FAT	GO:0008233~peptidase activity	15	390625	0.7266110370800642	74996,22225,23997,26440,14479,73677,22019,22273,16993,19072,235606,67003,19172,22138,19184	337	629	13288	0.9403084355082959	1.0	0.9991956232145384	1e+16
GOTERM_MF_FAT	GO:0004175~endopeptidase activity	10	2.60417e+15	0.7424448522826798	19072,23997,235606,26440,67003,19172,22138,73677,22019,22273	337	421	13288	0.9365859159694665	1.0	0.9993704045114559	999999996510002
SP_PIR_KEYWORDS	Protease	10	2.60417e+15	0.7486648621296293	16993,19072,74996,22225,26440,19172,14479,73677,22019,19184	377	509	17854	0.9304143454946247	1.0	0.985805127049863	1e+16
GOTERM_MF_FAT	GO:0070011~peptidase activity, acting on L-amino acid peptides	14	3.64583e+16	0.7615920144544318	74996,22225,23997,26440,14479,73677,22019,22273,16993,19072,235606,67003,19172,22138	337	603	13288	0.9154622535197405	1.0	0.9995098548867982	1e+16
Annotation Cluster 83	Enrichment Score: 0.16308073853705113
Category	Term	Count	%	PValue	Genes	List Total	Pop Hits	Pop Total	Fold Enrichment	Bonferroni	Benjamini	FDR
GOTERM_BP_FAT	GO:0022402~cell cycle process	10	2.60417e+15	0.5703107193704999	236539,11426,23997,18148,22152,22154,668829,17886,11636,19045	318	393	13588	1.08727e+16	1.0	0.9962052511112055	9.99999e+15
GOTERM_BP_FAT	GO:0051327~M phase of meiotic cell cycle	3	0.78125	0.6123125560260796	23997,17886,19045	318	88	13588	1.45669e+15	1.0	0.9973415418385563	1e+16
GOTERM_BP_FAT	GO:0007126~meiosis	3	0.78125	0.6123125560260796	23997,17886,19045	318	88	13588	1.45669e+15	1.0	0.9973415418385563	1e+16
GOTERM_BP_FAT	GO:0051321~meiotic cell cycle	3	0.78125	0.6245618551480892	23997,17886,19045	318	90	13588	1.42432e+16	1.0	0.9976321707872621	1e+16
GOTERM_BP_FAT	GO:0007049~cell cycle	13	3.38542e+16	0.7698483112326567	23997,22152,17886,236539,234664,18148,11426,668829,22154,53860,11636,19046,19045	318	611	13588	0.9091395691154824	1.0	0.9996277573409105	1e+16
GOTERM_BP_FAT	GO:0000279~M phase	6	15625	0.7937535326004572	23997,22152,22154,668829,17886,19045	318	283	13588	0.9059270618041202	1.0	0.9997715067242793	1e+16
GOTERM_BP_FAT	GO:0022403~cell cycle phase	6	15625	0.8845261493879195	23997,22152,22154,668829,17886,19045	318	328	13588	0.781638288080994	1.0	0.999973557027875	1e+16
Annotation Cluster 84	Enrichment Score: 0.10702368760543506
Category	Term	Count	%	PValue	Genes	List Total	Pop Hits	Pop Total	Fold Enrichment	Bonferroni	Benjamini	FDR
GOTERM_BP_FAT	GO:0043066~negative regulation of apoptosis	6	15625	0.659123696698559	22070,11657,19053,12385,15482,22629	318	239	13588	1.07271e+16	1.0	0.9983460068609377	1e+16
GOTERM_BP_FAT	GO:0043069~negative regulation of programmed cell death	6	15625	0.6768629964586437	22070,11657,19053,12385,15482,22629	318	244	13588	1.05073e+16	1.0	0.9985659115988533	1e+16
GOTERM_BP_FAT	GO:0060548~negative regulation of cell death	6	15625	0.6803365929049368	22070,11657,19053,12385,15482,22629	318	245	13588	1.04644e+16	1.0	0.9985740008802928	1e+16
GOTERM_BP_FAT	GO:0042981~regulation of apoptosis	10	2.60417e+15	0.9030947431340405	22070,11657,19053,20091,18477,14827,12385,15482,22629,269523	318	553	13588	0.7726864330637915	1.0	0.9999856453425688	100.0
GOTERM_BP_FAT	GO:0043067~regulation of programmed cell death	10	2.60417e+15	0.9104408387210559	22070,11657,19053,20091,18477,14827,12385,15482,22629,269523	318	560	13588	0.7630278526504942	1.0	0.9999879341300593	100.0
GOTERM_BP_FAT	GO:0010941~regulation of cell death	10	2.60417e+15	0.9134426830412288	22070,11657,19053,20091,18477,14827,12385,15482,22629,269523	318	563	13588	0.7589619848743814	1.0	0.9999888584947354	100.0
Annotation Cluster 85	Enrichment Score: 0.10202158502965222
Category	Term	Count	%	PValue	Genes	List Total	Pop Hits	Pop Total	Fold Enrichment	Bonferroni	Benjamini	FDR
GOTERM_MF_FAT	GO:0016566~specific transcriptional repressor activity	3	0.78125	0.11396481670300425	12034,19291,15184	337	23	13288	514307831247581	1.0	0.6269857827148299	8.23949e+15
GOTERM_MF_FAT	GO:0008134~transcription factor binding	10	2.60417e+15	0.30591920912079484	18148,12387,22321,19291,11472,15184,21849,70465,19184,114584	337	288	13288	1.36911e+16	1.0	0.9045889413308372	9.94711e+15
GOTERM_MF_FAT	GO:0003713~transcription coactivator activity	4	1.04167e+16	0.46571708151169	12387,11472,21849,70465	337	100	13288	1.57721e+16	1.0	0.9783228587373254	999876389155336
GOTERM_MF_FAT	GO:0003712~transcription cofactor activity	5	1.30208e+16	0.6713542398113141	12387,11472,15184,21849,70465	337	180	13288	1.09529e+15	1.0	0.9982131293193778	1e+16
GOTERM_CC_FAT	GO:0005654~nucleoplasm	14	3.64583e+16	0.6852014836040111	15387,83701,18747,12387,15184,213464,21849,17913,245688,21399,18148,98758,19045,19184	301	599	12504	0.9709205264588268	1.0	0.9626176302188392	1e+16
UP_SEQ_FEATURE	compositionally biased region:Poly-Gly	5	1.30208e+16	0.7118031371016734	76936,94186,19291,15184,21849	366	211	16021	1.03728e+16	1.0	0.9999999995390406	999999999113397
GOTERM_BP_FAT	GO:0010605~negative regulation of macromolecule metabolic process	11	2.86458e+15	0.748033140563543	83701,245688,14359,18148,12387,19291,16332,15184,21849,22627,19184	318	506	13588	0.9289034727919059	1.0	0.9994636226615837	1e+16
GOTERM_MF_FAT	GO:0016564~transcription repressor activity	5	1.30208e+16	0.7848372208884781	245688,12034,19291,15184,21849	337	211	13288	0.9343665180643256	1.0	0.9996897965655593	1e+16
GOTERM_BP_FAT	GO:0010629~negative regulation of gene expression	8	2.08333e+15	0.8471224794192045	83701,245688,12387,19291,16332,15184,21849,19184	318	410	13588	0.8337475072863937	1.0	0.9999317323760468	1e+16
GOTERM_BP_FAT	GO:0051253~negative regulation of RNA metabolic process	6	15625	0.8533192128918609	245688,18148,12387,19291,15184,21849	318	310	13588	0.8270237370663421	1.0	0.9999404595852782	1e+16
GOTERM_BP_FAT	GO:0031327~negative regulation of cellular biosynthetic process	8	2.08333e+15	0.8787625281318223	245688,14359,12387,19291,15184,21849,19184,11928	318	430	13588	0.7949685534591194	1.0	0.9999712218408243	999999999999999
GOTERM_BP_FAT	GO:0009890~negative regulation of biosynthetic process	8	2.08333e+15	0.8843939638267948	245688,14359,12387,19291,15184,21849,19184,11928	318	434	13588	0.7876416543488972	1.0	0.999974419117837	1e+16
GOTERM_MF_FAT	GO:0016563~transcription activator activity	5	1.30208e+16	0.8968034600652157	12387,11472,21849,70465,22629	337	259	13288	0.7612020668400491	1.0	0.9999849747220168	1e+16
GOTERM_BP_FAT	GO:0045934~negative regulation of nucleobase, nucleoside, nucleotide and nucleic acid metabolic process	7	1.82292e+16	0.9053392257089679	245688,18148,12387,19291,15184,21849,19184	318	397	13588	0.753417930073032	1.0	0.9999860945862831	100.0
GOTERM_BP_FAT	GO:0000122~negative regulation of transcription from RNA polymerase II promoter	4	1.04167e+16	0.9090415529307422	245688,12387,15184,21849	318	231	13588	0.7399057965095702	1.0	0.9999880187335979	100.0
GOTERM_BP_FAT	GO:0051172~negative regulation of nitrogen compound metabolic process	7	1.82292e+16	0.9101662083706543	245688,18148,12387,19291,15184,21849,19184	318	401	13588	0.7459025392493608	1.0	0.9999882390537893	100.0
SP_PIR_KEYWORDS	repressor	6	15625	0.9176302002938511	11737,245688,12034,19291,15184,21849	377	391	17854	0.7267226115449062	1.0	0.9992344528787523	1e+16
GOTERM_BP_FAT	GO:0010558~negative regulation of macromolecule biosynthetic process	7	1.82292e+16	0.9283829043070644	245688,14359,12387,19291,15184,21849,19184	318	418	13588	0.7155667900454394	1.0	0.999993821085631	100.0
GOTERM_BP_FAT	GO:0045892~negative regulation of transcription, DNA-dependent	5	1.30208e+16	0.9318854464659754	245688,12387,19291,15184,21849	318	308	13588	0.693661684227722	1.0	0.9999939618759257	100.0
GOTERM_BP_FAT	GO:0016481~negative regulation of transcription	6	15625	0.9379081406557417	245688,12387,19291,15184,21849,19184	318	372	13588	0.689186447555285	1.0	0.9999952949210471	100.0
GOTERM_CC_FAT	GO:0044451~nucleoplasm part	6	15625	0.9949780108896829	245688,18148,12387,15184,213464,19184	301	513	12504	0.4858658273590954	1.0	0.9999979842241394	100.0
GOTERM_BP_FAT	GO:0006357~regulation of transcription from RNA polymerase II promoter	7	1.82292e+16	0.9965769940375697	245688,21399,12387,15184,21849,70465,68016	318	616	13588	0.4855631789594054	1.0	0.9999999997699748	100.0
SP_PIR_KEYWORDS	transcription regulation	14	3.64583e+16	0.9999846847648283	19285,11737,27374,12387,19291,15184,213464,21849,67088,68016,245688,21399,12034,11991	377	1546	17854	0.4288572203101355	1.0	0.9999999999985766	100.0
GOTERM_MF_FAT	GO:0030528~transcription regulator activity	11	2.86458e+15	0.9999981020138019	19285,245688,21399,12034,12387,19291,11472,15184,21849,70465,22629	337	1206	13288	0.3596458853113267	1.0	1.0	100.0
SP_PIR_KEYWORDS	Transcription	14	3.64583e+16	0.999999541772628	19285,11737,27374,12387,19291,15184,213464,21849,67088,68016,245688,21399,12034,11991	377	1769	17854	0.3747955130579251	1.0	0.9999999999999993	100.0
GOTERM_BP_FAT	GO:0051252~regulation of RNA metabolic process	11	2.86458e+15	0.9999999446723924	245688,21399,18148,229663,12387,19291,15184,21849,70465,11991,68016	318	1488	13588	0.31587712179617233	1.0	1.0	100.0
GOTERM_MF_FAT	GO:0003700~transcription factor activity	3	0.78125	0.9999999715727667	12387,19291,21849	337	776	13288	0.15243659946771088	1.0	1.0	100.0
GOTERM_BP_FAT	GO:0006355~regulation of transcription, DNA-dependent	9	234375	0.9999999959565643	245688,21399,229663,12387,19291,15184,21849,70465,68016	318	1465	13588	0.26250241483675707	1.0	1.0	100.0
GOTERM_BP_FAT	GO:0006350~transcription	13	3.38542e+16	0.9999999967260289	19285,11737,27374,12387,19291,15184,21849,67088,68016,245688,21399,12034,11991	318	1772	13588	0.3134787114726635	1.0	1.0	100.0
GOTERM_BP_FAT	GO:0045449~regulation of transcription	17	4.42708e+15	0.9999999999098867	19285,11737,27374,12387,19291,15184,21849,67088,68016,245688,21399,229663,12034,70465,22629,19184,11991	318	2227	13588	0.32617984540784484	1.0	1.0	100.0
Annotation Cluster 86	Enrichment Score: 0.09773991000013564
Category	Term	Count	%	PValue	Genes	List Total	Pop Hits	Pop Total	Fold Enrichment	Bonferroni	Benjamini	FDR
GOTERM_BP_FAT	GO:0060284~regulation of cell development	4	1.04167e+16	0.7212313123008125	15184,12385,22628,22629	318	159	13588	1.07496e+16	1.0	0.9992417890708447	1e+16
GOTERM_BP_FAT	GO:0050767~regulation of neurogenesis	3	0.78125	0.8172962954466663	12385,22628,22629	318	132	13588	0.9711263579188107	1.0	0.9998664552380794	1e+16
GOTERM_BP_FAT	GO:0051960~regulation of nervous system development	3	0.78125	0.8636269100779008	12385,22628,22629	318	148	13588	0.8661397246302907	1.0	0.9999538804878305	1e+16
Annotation Cluster 87	Enrichment Score: 0.09099821951954232
Category	Term	Count	%	PValue	Genes	List Total	Pop Hits	Pop Total	Fold Enrichment	Bonferroni	Benjamini	FDR
GOTERM_BP_FAT	GO:0046649~lymphocyte activation	5	1.30208e+16	0.6549095721012561	15510,12387,15184,18518,17886	318	191	13588	1.11857e+16	1.0	0.9982703520092114	1e+16
GOTERM_BP_FAT	GO:0030099~myeloid cell differentiation	3	0.78125	0.6595108488000359	21399,12387,17886	318	96	13588	1.3353e+16	1.0	0.9983096685593177	1e+16
GOTERM_BP_FAT	GO:0045321~leukocyte activation	5	1.30208e+16	0.7555885700410965	15510,12387,15184,18518,17886	318	219	13588	0.9755607248499469	1.0	0.9995313144842914	999999999904808
GOTERM_BP_FAT	GO:0042110~T cell activation	3	0.78125	0.7574062928980361	15510,12387,17886	318	116	13588	1.10507e+15	1.0	0.9995356481127443	999999999915763
GOTERM_BP_FAT	GO:0001775~cell activation	5	1.30208e+16	0.8297246458975214	15510,12387,15184,18518,17886	318	246	13588	0.8684869867566599	1.0	0.999900783625107	1e+16
GOTERM_BP_FAT	GO:0002521~leukocyte differentiation	3	0.78125	0.8476737147322105	12387,15184,17886	318	142	13588	0.9027371777836831	1.0	0.9999304762615533	1e+16
GOTERM_BP_FAT	GO:0030097~hemopoiesis	4	1.04167e+16	0.9352044115093479	21399,12387,15184,17886	318	251	13588	0.6809491593374928	1.0	0.9999945443803467	100.0
GOTERM_BP_FAT	GO:0048534~hemopoietic or lymphoid organ development	4	1.04167e+16	0.9617183286408022	21399,12387,15184,17886	318	281	13588	0.6082499608317107	1.0	0.9999990351041537	100.0
GOTERM_BP_FAT	GO:0002520~immune system development	4	1.04167e+16	0.9702447619615275	21399,12387,15184,17886	318	295	13588	0.5793838609956296	1.0	0.9999995415982531	100.0
Annotation Cluster 88	Enrichment Score: 0.08881702918853088
Category	Term	Count	%	PValue	Genes	List Total	Pop Hits	Pop Total	Fold Enrichment	Bonferroni	Benjamini	FDR
GOTERM_BP_FAT	GO:0001525~angiogenesis	4	1.04167e+16	0.6034229710642613	13722,12387,17886,12306	318	133	13588	1.2851e+16	1.0	0.9972575609242317	1e+16
GOTERM_BP_FAT	GO:0048514~blood vessel morphogenesis	4	1.04167e+16	0.8446316774194149	13722,12387,17886,12306	318	198	13588	0.8632234292611651	1.0	0.9999285211392182	1e+16
GOTERM_BP_FAT	GO:0001568~blood vessel development	4	1.04167e+16	0.9269542043779997	13722,12387,17886,12306	318	244	13588	0.700484586039798	1.0	0.9999935101544571	100.0
GOTERM_BP_FAT	GO:0001944~vasculature development	4	1.04167e+16	0.9340807035741747	13722,12387,17886,12306	318	250	13588	0.6836729559748428	1.0	0.9999943443938692	100.0
Annotation Cluster 89	Enrichment Score: 0.08763112163414413
Category	Term	Count	%	PValue	Genes	List Total	Pop Hits	Pop Total	Fold Enrichment	Bonferroni	Benjamini	FDR
GOTERM_BP_FAT	GO:0048754~branching morphogenesis of a tube	3	0.78125	0.6423719548023048	12034,12387,19045	318	93	13588	137837289511057	1.0	0.9980312014607337	999999951464117
GOTERM_BP_FAT	GO:0035239~tube morphogenesis	4	1.04167e+16	0.76562380155841	22323,12034,12387,19045	318	171	13588	0.9995218654602965	1.0	0.9996022834191866	1e+16
GOTERM_BP_FAT	GO:0001763~morphogenesis of a branching structure	3	0.78125	0.7929204826600453	12034,12387,19045	318	125	13588	1.02551e+16	1.0	0.9997742419463899	1e+16
GOTERM_BP_FAT	GO:0060429~epithelium development	5	1.30208e+16	0.8807623621735301	22323,12034,12387,16664,70465	318	271	13588	0.7883682610411009	1.0	0.9999713552964582	1e+16
GOTERM_BP_FAT	GO:0002009~morphogenesis of an epithelium	3	0.78125	0.9149148707274415	22323,12034,12387	318	173	13588	0.7409750245392082	1.0	0.99998886071269	100.0
GOTERM_BP_FAT	GO:0035295~tube development	4	1.04167e+16	0.9482922501055394	22323,12034,12387,19045	318	264	13588	0.6474175719458739	1.0	0.9999975112612757	100.0
Annotation Cluster 90	Enrichment Score: 0.08508852372477468
Category	Term	Count	%	PValue	Genes	List Total	Pop Hits	Pop Total	Fold Enrichment	Bonferroni	Benjamini	FDR
SP_PIR_KEYWORDS	potassium	3	0.78125	0.7138997394662308	18746,232087,11928	377	118	17854	1.20402e+16	1.0	0.9823598493843122	1e+16
GOTERM_MF_FAT	GO:0030955~potassium ion binding	3	0.78125	0.8035525941928493	18746,232087,11928	337	118	13288	1.00246e+16	1.0	0.999769814314191	1e+16
GOTERM_MF_FAT	GO:0031420~alkali metal ion binding	3	0.78125	0.9684626981562897	18746,232087,11928	337	206	13288	0.5742271902278816	1.0	0.9999997208994502	100.0
Annotation Cluster 91	Enrichment Score: 0.07334079770221064
Category	Term	Count	%	PValue	Genes	List Total	Pop Hits	Pop Total	Fold Enrichment	Bonferroni	Benjamini	FDR
GOTERM_CC_FAT	GO:0044454~nuclear chromosome part	3	0.78125	0.7117265511943685	21454,19291,21849	301	103	12504	1.20995e+15	1.0	0.9690811568958827	1e+16
GOTERM_CC_FAT	GO:0000228~nuclear chromosome	3	0.78125	0.791025550999213	21454,19291,21849	301	121	12504	1.02996e+16	1.0	0.9869427576814203	1e+16
GOTERM_CC_FAT	GO:0044427~chromosomal part	5	1.30208e+16	0.9497713656497538	21454,19053,19291,18538,21849	301	318	12504	0.6531686830063311	1.0	0.9996247825311587	100.0
GOTERM_CC_FAT	GO:0005694~chromosome	6	15625	0.9517306540296149	21454,19053,19291,18538,21849,11991	301	378	12504	0.6593893371302009	1.0	0.9996398491700406	100.0
Annotation Cluster 92	Enrichment Score: 0.071729281728593
Category	Term	Count	%	PValue	Genes	List Total	Pop Hits	Pop Total	Fold Enrichment	Bonferroni	Benjamini	FDR
GOTERM_BP_FAT	GO:0006887~exocytosis	3	0.78125	0.7309090865949598	76983,353172,434246	318	110	13588	1.16535e+16	1.0	0.9993388263663742	999999999539917
GOTERM_BP_FAT	GO:0046903~secretion	4	1.04167e+16	0.8926560674189262	76983,353172,434246,12847	318	221	13588	0.7733856968041208	1.0	0.9999799592385915	1e+16
GOTERM_BP_FAT	GO:0032940~secretion by cell	3	0.78125	0.9338231422759093	76983,353172,434246	318	186	13588	0.689186447555285	1.0	0.99999447313037	100.0
Annotation Cluster 93	Enrichment Score: 0.058971171811670005
Category	Term	Count	%	PValue	Genes	List Total	Pop Hits	Pop Total	Fold Enrichment	Bonferroni	Benjamini	FDR
GOTERM_CC_FAT	GO:0005604~basement membrane	3	0.78125	0.5259888538950451	11657,12306,14268	301	73	12504	1.70719e+15	1.0	0.9000372316186207	9.99959e+15
GOTERM_CC_FAT	GO:0044420~extracellular matrix part	3	0.78125	0.6518336761652531	11657,12306,14268	301	92	12504	1.35462e+16	1.0	0.9515100762265924	9.99999e+15
GOTERM_CC_FAT	GO:0005578~proteinaceous extracellular matrix	3	0.78125	0.9942722196195195	11657,12306,14268	301	297	12504	0.41961139635558237	1.0	0.9999977066339653	100.0
GOTERM_CC_FAT	GO:0005615~extracellular space	6	15625	0.9947952258887764	22070,11657,110611,13722,12847,11287	301	511	12504	0.4877674548634362	1.0	0.9999980060202766	100.0
GOTERM_CC_FAT	GO:0031012~extracellular matrix	3	0.78125	0.9955960209736745	11657,12306,14268	301	309	12504	0.4033158081475986	1.0	0.9999982205775697	100.0
GOTERM_CC_FAT	GO:0044421~extracellular region part	8	2.08333e+15	0.9995284130436344	22070,11657,110611,13722,12847,12306,14268,11287	301	774	12504	0.42936980092199134	1.0	0.9999999899567836	100.0
SP_PIR_KEYWORDS	Secreted	7	1.82292e+16	0.9999999920487788	12321,11657,13722,12847,12306,14268,11287	377	1420	17854	0.2334553741547428	1.0	1.0	100.0
GOTERM_CC_FAT	GO:0005576~extracellular region	11	2.86458e+15	0.9999999996489517	22070,12321,11657,110611,13722,14828,12847,11674,12306,14268,11287	301	1680	12504	0.2719981015662079	1.0	1.0	100.0
Annotation Cluster 94	Enrichment Score: 0.056939682759453346
Category	Term	Count	%	PValue	Genes	List Total	Pop Hits	Pop Total	Fold Enrichment	Bonferroni	Benjamini	FDR
GOTERM_MF_FAT	GO:0004867~serine-type endopeptidase inhibitor activity	3	0.78125	0.7918320552943987	20719,12406,11287	337	115	13288	1.02862e+15	1.0	0.9997153561143874	1e+16
GOTERM_MF_FAT	GO:0004857~enzyme inhibitor activity	5	1.30208e+16	0.8669268289763865	20719,12406,66471,12306,11287	337	243	13288	0.8113223675373362	1.0	0.9999574018850264	1e+16
GOTERM_MF_FAT	GO:0004866~endopeptidase inhibitor activity	3	0.78125	0.9174663275336437	20719,12406,11287	337	161	13288	0.7347254732108299	1.0	0.999993599669884	1e+16
GOTERM_MF_FAT	GO:0030414~peptidase inhibitor activity	3	0.78125	0.9398003720164897	20719,12406,11287	337	176	13288	0.6721068249258161	1.0	0.9999976557013259	100.0
Annotation Cluster 95	Enrichment Score: 0.05143705468748759
Category	Term	Count	%	PValue	Genes	List Total	Pop Hits	Pop Total	Fold Enrichment	Bonferroni	Benjamini	FDR
GOTERM_MF_FAT	GO:0005099~Ras GTPase activator activity	3	0.78125	0.4921400778009169	29875,14569,68016	337	65	13288	1.81986e+16	1.0	0.9832673287572071	9.9994e+15
GOTERM_MF_FAT	GO:0005083~small GTPase regulator activity	4	1.04167e+16	0.9241410050976032	29875,22138,14569,68016	337	223	13288	0.7072693643464492	1.0	0.999995183272478	1e+16
GOTERM_BP_FAT	GO:0007264~small GTPase mediated signal transduction	4	1.04167e+16	0.9425896634480481	29875,22630,14569,68016	318	258	13588	0.6624737945492662	1.0	0.9999963831137735	100.0
GOTERM_MF_FAT	GO:0008047~enzyme activator activity	4	1.04167e+16	0.9534335520347055	29875,14569,14268,68016	337	249	13288	0.6334179447761372	1.0	0.9999989415794295	100.0
GOTERM_MF_FAT	GO:0005096~GTPase activator activity	3	0.78125	0.9572565918384298	29875,14569,68016	337	192	13288	0.6160979228486647	1.0	0.9999990701272022	100.0
GOTERM_MF_FAT	GO:0030695~GTPase regulator activity	4	1.04167e+16	0.9951851987839294	29875,22138,14569,68016	337	361	13288	0.43690046606442706	1.0	0.9999999998298355	100.0
GOTERM_MF_FAT	GO:0060589~nucleoside-triphosphatase regulator activity	4	1.04167e+16	0.9957617146870721	29875,22138,14569,68016	337	367	13288	0.429757679153292	1.0	0.9999999998789759	100.0
GOTERM_BP_FAT	GO:0007242~intracellular signaling cascade	8	2.08333e+15	0.9999442466868146	14228,29875,18803,22630,14694,22629,14569,68016	318	915	13588	0.3735917792212256	1.0	0.9999999999999999	100.0
Annotation Cluster 96	Enrichment Score: 0.0504468880832456
Category	Term	Count	%	PValue	Genes	List Total	Pop Hits	Pop Total	Fold Enrichment	Bonferroni	Benjamini	FDR
GOTERM_BP_FAT	GO:0043010~camera-type eye development	3	0.78125	0.8106063341636028	12955,12387,668829	318	130	13588	0.986066763425254	1.0	0.9998441878343272	1e+16
GOTERM_BP_FAT	GO:0001654~eye development	3	0.78125	0.8847070606373211	12955,12387,668829	318	157	13588	0.8164884028361975	1.0	0.9999727287884419	1e+16
GOTERM_BP_FAT	GO:0007423~sensory organ development	3	0.78125	0.9841240595331261	12955,12387,668829	318	257	13588	0.49878863519565375	1.0	0.9999999460392613	100.0
Annotation Cluster 97	Enrichment Score: 0.03717610493295611
Category	Term	Count	%	PValue	Genes	List Total	Pop Hits	Pop Total	Fold Enrichment	Bonferroni	Benjamini	FDR
SP_PIR_KEYWORDS	chromatin regulator	4	1.04167e+16	0.7728814759537378	245688,27374,15184,213464	377	192	17854	0.9866268788682581	1.0	0.9891789052064186	1e+16
GOTERM_BP_FAT	GO:0051276~chromosome organization	6	15625	0.9615514949650539	26926,245688,27374,15184,15482,17955	318	404	13588	0.6345974220063515	1.0	0.9999990596175201	100.0
GOTERM_BP_FAT	GO:0016568~chromatin modification	3	0.78125	0.9755814299855539	245688,27374,15184	318	236	13588	0.5431723696834027	1.0	0.9999997883772722	100.0
GOTERM_BP_FAT	GO:0006325~chromatin organization	4	1.04167e+16	0.9793695777910816	245688,27374,15184,17955	318	315	13588	0.5425975841070181	1.0	0.9999998778509169	100.0
Annotation Cluster 98	Enrichment Score: 0.03417186772142993
Category	Term	Count	%	PValue	Genes	List Total	Pop Hits	Pop Total	Fold Enrichment	Bonferroni	Benjamini	FDR
UP_SEQ_FEATURE	repeat:LRR 4	4	1.04167e+16	0.8828407189781684	11737,66471,107702,72946	366	221	16021	0.7922755483025492	1.0	0.9999999999999979	1e+16
UP_SEQ_FEATURE	repeat:LRR 3	4	1.04167e+16	0.9205322698008878	11737,66471,107702,72946	366	245	16021	0.7146648823463811	1.0	1.0	100.0
SP_PIR_KEYWORDS	leucine-rich repeat	4	1.04167e+16	0.9315728689804786	11737,66471,107702,72946	377	275	17854	0.688844948155293	1.0	0.9994896883896192	1e+16
UP_SEQ_FEATURE	repeat:LRR 1	4	1.04167e+16	0.9440635460790824	11737,66471,107702,72946	366	266	16021	0.6582439705821931	1.0	1.0	100.0
UP_SEQ_FEATURE	repeat:LRR 2	4	1.04167e+16	0.9440635460790824	11737,66471,107702,72946	366	266	16021	0.6582439705821931	1.0	1.0	100.0
Annotation Cluster 99	Enrichment Score: 0.03303695604254765
Category	Term	Count	%	PValue	Genes	List Total	Pop Hits	Pop Total	Fold Enrichment	Bonferroni	Benjamini	FDR
GOTERM_BP_FAT	GO:0006928~cell motion	7	1.82292e+16	0.8616006038883832	22323,13722,11426,668829,11947,17886,22627	318	367	13588	0.8150052268092471	1.0	0.9999521653113677	1e+16
GOTERM_BP_FAT	GO:0016477~cell migration	4	1.04167e+16	0.9218187306681579	13722,11947,17886,22627	318	240	13588	0.7121593291404612	1.0	0.9999918324954227	100.0
GOTERM_BP_FAT	GO:0048870~cell motility	4	1.04167e+16	0.9637187893112116	13722,11947,17886,22627	318	284	13588	0.6018247851891222	1.0	0.9999991601007046	100.0
GOTERM_BP_FAT	GO:0051674~localization of cell	4	1.04167e+16	0.9637187893112116	13722,11947,17886,22627	318	284	13588	0.6018247851891222	1.0	0.9999991601007046	100.0
Annotation Cluster 100	Enrichment Score: 0.030980106244126646
Category	Term	Count	%	PValue	Genes	List Total	Pop Hits	Pop Total	Fold Enrichment	Bonferroni	Benjamini	FDR
UP_SEQ_FEATURE	active site:Charge relay system	4	1.04167e+16	0.8326006583532216	19072,13885,235606,22019	366	198	16021	0.884307556438704	1.0	0.9999999999998133	1e+16
GOTERM_MF_FAT	GO:0004252~serine-type endopeptidase activity	3	0.78125	0.9544025681325897	19072,235606,22019	337	189	13288	0.6258772549573737	1.0	0.9999989076031724	100.0
GOTERM_MF_FAT	GO:0008236~serine-type peptidase activity	3	0.78125	0.9723473782488519	19072,235606,22019	337	212	13288	0.5579754772969039	1.0	0.9999998194001772	100.0
GOTERM_MF_FAT	GO:0017171~serine hydrolase activity	3	0.78125	0.9729483328688158	19072,235606,22019	337	213	13288	0.5553558741171063	1.0	0.9999998116621664	100.0
Annotation Cluster 101	Enrichment Score: 0.026308479888815513
Category	Term	Count	%	PValue	Genes	List Total	Pop Hits	Pop Total	Fold Enrichment	Bonferroni	Benjamini	FDR
GOTERM_BP_FAT	GO:0006915~apoptosis	8	2.08333e+15	0.921043885172716	26926,13722,234664,12387,11464,19291,227197,269523	318	465	13588	0.7351322107256374	1.0	0.9999917919582854	100.0
GOTERM_BP_FAT	GO:0012501~programmed cell death	8	2.08333e+15	0.9286927305552072	26926,13722,234664,12387,11464,19291,227197,269523	318	473	13588	0.722698684962836	1.0	0.999993689074191	100.0
GOTERM_BP_FAT	GO:0008219~cell death	8	2.08333e+15	0.9544392904017366	26926,13722,234664,12387,11464,19291,227197,269523	318	507	13588	0.6742336843933361	1.0	0.9999982941569836	100.0
GOTERM_BP_FAT	GO:0016265~death	8	2.08333e+15	0.9613142975448437	26926,13722,234664,12387,11464,19291,227197,269523	318	519	13588	0.6586444662570741	1.0	0.9999990765784657	100.0
Annotation Cluster 102	Enrichment Score: 0.021524183972100125
Category	Term	Count	%	PValue	Genes	List Total	Pop Hits	Pop Total	Fold Enrichment	Bonferroni	Benjamini	FDR
GOTERM_BP_FAT	GO:0030030~cell projection organization	6	15625	0.8697064043630314	22323,236539,668829,17886,22330,12345	318	319	13588	0.8036907789672916	1.0	0.9999603965493988	1e+16
GOTERM_BP_FAT	GO:0031175~neuron projection development	3	0.78125	0.9648642221771326	22323,236539,668829	318	218	13588	0.5880214644279037	1.0	0.9999992329774394	100.0
GOTERM_BP_FAT	GO:0030182~neuron differentiation	5	1.30208e+16	0.9849173068089871	22323,236539,22152,668829,108124	318	399	13588	0.5354581422108731	1.0	0.9999999514171442	100.0
GOTERM_BP_FAT	GO:0048666~neuron development	3	0.78125	0.9923494294301322	22323,236539,668829	318	292	13588	0.43900232618247603	1.0	0.9999999954945388	100.0
Annotation Cluster 103	Enrichment Score: 0.012899124012023215
Category	Term	Count	%	PValue	Genes	List Total	Pop Hits	Pop Total	Fold Enrichment	Bonferroni	Benjamini	FDR
GOTERM_BP_FAT	GO:0007268~synaptic transmission	3	0.78125	0.9227199493610733	11739,12387,16561	318	178	13588	0.7201611193555226	1.0	0.9999919367885958	100.0
GOTERM_BP_FAT	GO:0019226~transmission of nerve impulse	3	0.78125	0.97009205302917	11739,12387,16561	318	226	13588	0.5672065453331108	1.0	0.999999572639088	100.0
GOTERM_BP_FAT	GO:0007267~cell-cell signaling	3	0.78125	0.9920204998904842	11739,12387,16561	318	290	13588	0.4420299284320104	1.0	0.9999999949732579	100.0
GOTERM_BP_FAT	GO:0050877~neurological system process	5	1.30208e+16	0.9999999999999933	11739,12387,14387,22388,16561	318	1681	13588	0.1270956565985356	1.0	1.0	100.0
Annotation Cluster 104	Enrichment Score: 0.01267095838609145
Category	Term	Count	%	PValue	Genes	List Total	Pop Hits	Pop Total	Fold Enrichment	Bonferroni	Benjamini	FDR
GOTERM_BP_FAT	GO:0009611~response to wounding	5	1.30208e+16	0.9635743206500835	13722,26903,15184,434246,14268	318	347	13588	0.6156997081906005	1.0	0.9999991829613997	100.0
GOTERM_BP_FAT	GO:0006954~inflammatory response	3	0.78125	0.9694819784526283	13722,15184,14268	318	225	13588	0.5697274633123689	1.0	0.9999995558525265	100.0
GOTERM_BP_FAT	GO:0006952~defense response	6	15625	0.9807586945481823	13722,22321,15184,18477,14268,114584	318	448	13588	0.5722708894878706	1.0	0.9999999035485652	100.0
Annotation Cluster 105	Enrichment Score: 0.01102848918933239
Category	Term	Count	%	PValue	Genes	List Total	Pop Hits	Pop Total	Fold Enrichment	Bonferroni	Benjamini	FDR
GOTERM_BP_FAT	GO:0007283~spermatogenesis	4	1.04167e+16	0.9395252070645558	110957,15482,13382,16905	318	255	13588	0.6702676038969048	1.0	0.9999956375390001	100.0
GOTERM_BP_FAT	GO:0048232~male gamete generation	4	1.04167e+16	0.9395252070645558	110957,15482,13382,16905	318	255	13588	0.6702676038969048	1.0	0.9999956375390001	100.0
GOTERM_BP_FAT	GO:0007276~gamete generation	4	1.04167e+16	0.9846844275105693	110957,15482,13382,16905	318	331	13588	0.5163693020958028	1.0	0.9999999508881707	100.0
GOTERM_BP_FAT	GO:0019953~sexual reproduction	4	1.04167e+16	0.9946568243898168	110957,15482,13382,16905	318	386	13588	0.44279336526868057	1.0	0.9999999988375912	100.0
GOTERM_BP_FAT	GO:0032504~multicellular organism reproduction	4	1.04167e+16	0.9966001029228625	110957,15482,13382,16905	318	409	13588	0.4178930048745983	1.0	0.9999999997609489	100.0
GOTERM_BP_FAT	GO:0048609~reproductive process in a multicellular organism	4	1.04167e+16	0.9966001029228625	110957,15482,13382,16905	318	409	13588	0.4178930048745983	1.0	0.9999999997609489	100.0
Annotation Cluster 106	Enrichment Score: 0.010210129426412388
Category	Term	Count	%	PValue	Genes	List Total	Pop Hits	Pop Total	Fold Enrichment	Bonferroni	Benjamini	FDR
GOTERM_BP_FAT	GO:0051301~cell division	4	1.04167e+16	0.9617183286408022	17886,53860,19046,19045	318	281	13588	0.6082499608317107	1.0	0.9999990351041537	100.0
SP_PIR_KEYWORDS	cell division	3	0.78125	0.9727636896131251	53860,19046,19045	377	256	17854	0.5549776193633953	1.0	0.9999434353222516	100.0
SP_PIR_KEYWORDS	cell cycle	4	1.04167e+16	0.9961262100852284	234664,53860,19046,19045	377	447	17854	0.4237860419299901	1.0	0.9999992238517263	100.0
Annotation Cluster 107	Enrichment Score: 0.008042657368725226
Category	Term	Count	%	PValue	Genes	List Total	Pop Hits	Pop Total	Fold Enrichment	Bonferroni	Benjamini	FDR
GOTERM_BP_FAT	GO:0043065~positive regulation of apoptosis	3	0.78125	0.980892771462305	20091,18477,14827	318	248	13588	0.5168898356664637	1.0	0.9999999015118707	100.0
GOTERM_BP_FAT	GO:0043068~positive regulation of programmed cell death	3	0.78125	0.981661708253653	20091,18477,14827	318	250	13588	0.5127547169811321	1.0	0.9999999124516185	100.0
GOTERM_BP_FAT	GO:0010942~positive regulation of cell death	3	0.78125	0.9824006542941888	20091,18477,14827	318	252	13588	0.5086852351003295	1.0	0.9999999221375877	100.0
Annotation Cluster 108	Enrichment Score: 0.007482817905722689
Category	Term	Count	%	PValue	Genes	List Total	Pop Hits	Pop Total	Fold Enrichment	Bonferroni	Benjamini	FDR
GOTERM_MF_FAT	GO:0005244~voltage-gated ion channel activity	3	0.78125	0.9435195164515048	20190,29876,114584	337	179	13288	0.6608424647315286	1.0	0.9999980227614406	100.0
GOTERM_MF_FAT	GO:0022832~voltage-gated channel activity	3	0.78125	0.9435195164515048	20190,29876,114584	337	179	13288	0.6608424647315286	1.0	0.9999980227614406	100.0
SP_PIR_KEYWORDS	ionic channel	3	0.78125	0.9881458275962173	20190,29876,114584	377	301	17854	0.47200754337883455	1.0	0.9999906355852628	100.0
GOTERM_MF_FAT	GO:0022836~gated channel activity	3	0.78125	0.9941446193301372	20190,29876,114584	337	281	13288	0.4209637052916143	1.0	0.9999999996784443	100.0
GOTERM_MF_FAT	GO:0005216~ion channel activity	3	0.78125	0.9988012619975548	20190,29876,114584	337	349	13288	0.33894212374482413	1.0	0.9999999999990097	100.0
GOTERM_MF_FAT	GO:0022838~substrate specific channel activity	3	0.78125	0.999076342046809	20190,29876,114584	337	360	13288	0.3285855588526212	1.0	0.999999999999569	100.0
GOTERM_MF_FAT	GO:0022803~passive transmembrane transporter activity	3	0.78125	0.9991798288057265	20190,29876,114584	337	365	13288	0.3240843868135442	1.0	0.9999999999996626	100.0
GOTERM_MF_FAT	GO:0015267~channel activity	3	0.78125	0.9991798288057265	20190,29876,114584	337	365	13288	0.3240843868135442	1.0	0.9999999999996626	100.0
Annotation Cluster 109	Enrichment Score: 0.005981705691119712
Category	Term	Count	%	PValue	Genes	List Total	Pop Hits	Pop Total	Fold Enrichment	Bonferroni	Benjamini	FDR
GOTERM_MF_FAT	GO:0016563~transcription activator activity	5	1.30208e+16	0.8968034600652157	12387,11472,21849,70465,22629	337	259	13288	0.7612020668400491	1.0	0.9999849747220168	1e+16
GOTERM_BP_FAT	GO:0031328~positive regulation of cellular biosynthetic process	8	2.08333e+15	0.9756644159369979	15516,21399,18148,12387,21849,15519,22629,68016	318	552	13588	0.6192689818612707	1.0	0.9999997811610006	100.0
GOTERM_BP_FAT	GO:0009891~positive regulation of biosynthetic process	8	2.08333e+15	0.9773529012601786	15516,21399,18148,12387,21849,15519,22629,68016	318	557	13588	0.6137100143400743	1.0	0.9999998293144359	100.0
GOTERM_BP_FAT	GO:0051173~positive regulation of nitrogen compound metabolic process	7	1.82292e+16	0.9852187688547042	15516,21399,12387,21849,15519,22629,68016	318	526	13588	0.5686443312528398	1.0	0.9999999528647224	100.0
GOTERM_BP_FAT	GO:0045941~positive regulation of transcription	5	1.30208e+16	0.9961548626896275	21399,12387,21849,22629,68016	318	475	13588	0.4497848394571334	1.0	0.9999999996600353	100.0
GOTERM_BP_FAT	GO:0006357~regulation of transcription from RNA polymerase II promoter	7	1.82292e+16	0.9965769940375697	245688,21399,12387,15184,21849,70465,68016	318	616	13588	0.4855631789594054	1.0	0.9999999997699748	100.0
GOTERM_BP_FAT	GO:0010628~positive regulation of gene expression	5	1.30208e+16	0.9969802536089265	21399,12387,21849,22629,68016	318	488	13588	0.43780286627487375	1.0	0.9999999998391519	100.0
GOTERM_BP_FAT	GO:0045893~positive regulation of transcription, DNA-dependent	4	1.04167e+16	0.997040765483472	21399,12387,21849,68016	318	416	13588	0.41086115142718915	1.0	0.9999999998412111	100.0
GOTERM_BP_FAT	GO:0051254~positive regulation of RNA metabolic process	4	1.04167e+16	0.997212150989447	21399,12387,21849,68016	318	419	13588	0.40791942480599214	1.0	0.999999999865379	100.0
GOTERM_BP_FAT	GO:0045935~positive regulation of nucleobase, nucleoside, nucleotide and nucleic acid metabolic process	5	1.30208e+16	0.9980030656934139	21399,12387,21849,22629,68016	318	510	13588	0.41891725243556543	1.0	0.9999999999602462	100.0
GOTERM_BP_FAT	GO:0045944~positive regulation of transcription from RNA polymerase II promoter	3	0.78125	0.9981343110690135	21399,12387,68016	318	358	13588	0.358068936439338	1.0	0.9999999999671956	100.0
GOTERM_BP_FAT	GO:0010557~positive regulation of macromolecule biosynthetic process	5	1.30208e+16	0.9986354055078829	21399,12387,21849,22629,68016	318	530	13588	0.40310905423044974	1.0	0.9999999999893893	100.0
GOTERM_BP_FAT	GO:0010604~positive regulation of macromolecule metabolic process	5	1.30208e+16	0.999819787808118	21399,12387,21849,22629,68016	318	633	13588	0.33751626973481574	1.0	0.999999999999994	100.0
GOTERM_BP_FAT	GO:0006355~regulation of transcription, DNA-dependent	9	234375	0.9999999959565643	245688,21399,229663,12387,19291,15184,21849,70465,68016	318	1465	13588	0.26250241483675707	1.0	1.0	100.0
Annotation Cluster 110	Enrichment Score: 4.909273948356528E-4
Category	Term	Count	%	PValue	Genes	List Total	Pop Hits	Pop Total	Fold Enrichment	Bonferroni	Benjamini	FDR
SP_PIR_KEYWORDS	metal-binding	41	1.06771e+16	0.9950036357588813	18746,11657,22793,22225,232087,21849,15926,74551,216136,16993,27267,24131,21399,16971,11429,85305,22138,76952,227197,434246,19046,19045,11928,18451,14201,66445,67834,22186,13808,269951,67895,105787,19070,56445,19053,104112,14199,100044223,19139,11938,11937	377	2682	17854	0.7239678216303996	1.0	0.9999986621246062	100.0
GOTERM_MF_FAT	GO:0043167~ion binding	73	1.90104e+16	0.9997535866124428	20740,18746,269378,22225,20190,74551,22273,216136,27267,16993,18803,24131,17901,11426,107513,11429,56430,67003,227197,22138,76952,434246,19046,12306,19045,105148,14201,18451,98878,11472,66445,67834,22186,13808,14104,22070,56445,19053,170718,11474,100044223,22027,11657,22793,14977,109711,232087,21849,15926,29876,12321,19672,21399,16971,23874,106393,11928,102866,78830,11544,11749,19089,269951,67895…	337	3934	13288	0.7316750115782821	1.0	0.9999999999999966	100.0
GOTERM_MF_FAT	GO:0046872~metal ion binding	71	1.84896e+16	0.9997630777623719	20740,18746,269378,22225,20190,74551,22273,216136,16993,27267,18803,24131,17901,11426,107513,11429,56430,67003,22138,76952,227197,434246,19046,12306,19045,105148,14201,18451,98878,11472,66445,67834,22186,13808,14104,22070,56445,19053,170718,11474,100044223,22027,11657,22793,14977,109711,232087,21849,15926,12321,19672,21399,16971,23874,106393,11928,102866,78830,11544,11749,19089,269951,67895,10578…	337	3850	13288	0.7271555743959305	1.0	0.9999999999999961	100.0
GOTERM_MF_FAT	GO:0043169~cation binding	71	1.84896e+16	0.9998403872324991	20740,18746,269378,22225,20190,74551,22273,216136,16993,27267,18803,24131,17901,11426,107513,11429,56430,67003,22138,76952,227197,434246,19046,12306,19045,105148,14201,18451,98878,11472,66445,67834,22186,13808,14104,22070,56445,19053,170718,11474,100044223,22027,11657,22793,14977,109711,232087,21849,15926,12321,19672,21399,16971,23874,106393,11928,102866,78830,11544,11749,19089,269951,67895,10578…	337	3885	13288	0.7206046232752464	1.0	0.9999999999999986	100.0
GOTERM_MF_FAT	GO:0046914~transition metal ion binding	33	859375	0.999999896863178	269378,11657,22225,22793,14977,232087,21849,15926,22273,74551,16993,27267,24131,21399,11429,56430,67003,227197,434246,19046,19045,105148,18451,14201,66445,22186,67834,269951,14104,19070,56445,19053,14199	337	2608	13288	0.49892592525167934	1.0	1.0	100.0
Annotation Cluster 111	Enrichment Score: 3.0691539212907725E-4
Category	Term	Count	%	PValue	Genes	List Total	Pop Hits	Pop Total	Fold Enrichment	Bonferroni	Benjamini	FDR
SP_PIR_KEYWORDS	serine/threonine-protein kinase	3	0.78125	0.9975645319651893	18747,22138,105787	377	384	17854	0.3699850795755968	1.0	0.9999997007775979	100.0
GOTERM_BP_FAT	GO:0006468~protein amino acid phosphorylation	6	15625	0.9993331556326228	18747,20742,13665,22138,21849,105787	318	640	13588	0.4005896226415094	1.0	0.9999999999991982	100.0
GOTERM_MF_FAT	GO:0004674~protein serine/threonine kinase activity	3	0.78125	0.9997861184671089	18747,22138,105787	337	421	13288	0.28097577479083996	1.0	0.9999999999999967	100.0
UP_SEQ_FEATURE	domain:Protein kinase	3	0.78125	0.9998189167373082	18747,22138,105787	366	476	16021	0.2758816641410663	1.0	1.0	100.0
[truncated: 14 more rows]

## Sheet: Tissue
Annotation Cluster 1	Enrichment Score: 21.670963262351474
[truncated: 1,182 more rows]

[truncated: 1 more sheets: Core set]
